# Supplementary material for: Resolving the single-cell and spatial transcriptomic architecture of inflammatory tertiary lymphoid structures to decode gastric cancer immunotherapy prognosis
Source: Research Square preprint supplement (doi:10.21203/rs.3.rs-4482880/v1), 2024-06-12
Supplement: Supplementary file 1 [file cf57d122c06ac2c43eac7857.xlsx]

## Sheet: Supplemental table S1
Supplemental table S1, the clinical characteristics and TLS associated features in 25 GC patients for scRNA-seq
Sample	Age	Sex	Histopathological diagnosis	Site of origin	Lauren's classification	Stage	TLS	Number of TLS	Measured area (mm2)	TLS density (/cm2)	CD20 density (/cm2)	CD8 density (/cm2)
dTLS1	67	F	Signet ring cell carcinoma	Gastric antrum	Diffuse	III	dTLS	0	38.7	0	83.6404	37.954
dTLS2	74	M	Moderately poorly differentiated adenocarcinoma	Greater curvature	Intestinal	III	dTLS	0	241	0	48.1869	123.275
dTLS3	73	M	Moderately poorly differentiated adenocarcinoma	Gtomach angle	Intestinal	I	dTLS	1	127.6	0.783699	21.7697	33.5406
dTLS4	65	M	Large cell neuroendocrine carcinoma	Gastric pylorus	N/A	III	dTLS	0	123	0	24.5	56.1
dTLS5	54	F	Poorly differentiated adenocarcinoma	Cardia	Diffuse	I	dTLS	1	121	0	22.7129	73.3982
dTLS6	63	M	Poorly differentiated adenocarcinoma	Angular incisure	Mixed	II	dTLS	1	101.9	0.981354	81.111	121.092
iTLS1	75	M	Poorly differentiated adenocarcinoma	Gastric antrum	Diffuse	III	iTLS	33	185.2	17.8186	379.108	1262.51
iTLS2	62	M	Poorly differentiated adenocarcinoma, partial signet ring cell carcinoma	Angular incisure	Mixed	II	iTLS	10	16.2	15.7284	366.667	1155.33
iTLS4	62	F	Moderately differentiated adenocarcinoma	Gastric antrum and corpus	Intestinal	III	iTLS	12	147.6	8.13008	233.494	777.922
iTLS5	45	F	Poorly differentiated adenocarcinoma, partially signet ring cell carcinoma	Gastric antrum	Diffuse	III	iTLS	17	100.2	16.9661	512.2	1410.2
iTLS6	56	M	Poorly differentiated adenocarcinoma	Antrum	Mixed	I	iTLS	23	194.9	11.8009	359.312	819.312
iTLS7	47	M	Poorly differentiated adenocarcinoma, mostly signet ring cell carcinoma	Gastric antrum	Diffuse	III	iTLS	17	271.2	9.26844	129.053	818.599
iTLS8	64	M	Moderately poorly differentiated adenocarcinoma	Cardia	Intestinal	III	iTLS	7	43.9	15.9453	380.3	1321.3
iTLS9	58	M	Moderately poorly differentiated adenocarcinoma	Greater curvature	Mixed	I	iTLS	11	158.4	7.94444	359.339	652.442
pTLS1	67	F	Moderately poorly differentiated adenocarcinoma	Angular incisure	Intestinal	III	pTLS	14	132	10.6061	139.129	198.3
pTLS1	65	M	Moderately differentiated adenocarcinoma	Gastric antrum	Intestinal	I	pTLS	3	12.9	13.2558	376.3	347.3
pTLS10	48	M	Poorly differentiated adenocarcinoma	Gastric antrum	Diffuse	III	pTLS	32	276	11.5942	199.2	187.2
pTLS2	49	F	Moderately-well differentiated adenocarcinoma	Gastric antrum and gastric angle	Intestinal	II	pTLS	5	250	12	346.361	122.173
pTLS3	55	M	Poorly differentiated adenocarcinoma	Gastric antrum and corpus	Diffuse	II	pTLS	22	181.4	16.1279	413.145	57.2707
pTLS4	61	M	Moderately differentiated adenocarcinoma	Gastric antrum	Mixed	III	pTLS	29	276.3	10.4958	149.274	62.8302
pTLS5	67	F	Signet ring cell carcinoma	Gastric body	Diffuse	II	pTLS	14	158.8	8.81612	270.3	104.3
pTLS6	65	M	Moderately differentiated adenocarcinoma	Cardia	Intestinal	III	pTLS	13	200.7	6.47733	118.289	68.8571
pTLS8	72	M	Moderately differentiated adenocarcinoma	Gastric antrum	Intestinal	I	pTLS	11	432	2.5463	126.3	57.2
pTLS9	72	M	Moderately poorly differentiated adenocarcinoma	Angular incisure	Intestinal	III	pTLS	2	32	6.25	165.079	122.112
pTLS9	56	M	Moderately differentiated adenocarcinoma	Cardia	Intestinal	III	pTLS	11	157.6	6.9797	254.898	61.1047

## Sheet: Supplemental table S2
Supplementary Table S2, the top 30 DEGs of 11 main cell types
	p_val	avg_log2FC	pct.1	pct.2	p_val_adj	cluster	gene
1	0	3.24089	0.276	0.017	0	EPI	KRT17
2	0	2.93862	0.808	0.171	0	EPI	KRT18
3	0	2.8402	0.26	0.034	0	EPI	REG4
4	0	2.76894	0.27	0.034	0	EPI	FABP1
5	0	2.76523	0.515	0.14	0	EPI	PHGR1
6	0	2.73431	0.848	0.206	0	EPI	KRT8
7	0	2.63651	0.522	0.107	0	EPI	LGALS4
8	0	2.62311	0.688	0.148	0	EPI	KRT19
9	0	2.60973	0.551	0.039	0	EPI	CLDN4
10	0	2.21317	0.321	0.023	0	EPI	PRAP1
11	0	2.04042	0.573	0.084	0	EPI	EPCAM
12	0	2.03499	0.4	0.018	0	EPI	CLDN3
13	0	2.02771	0.49	0.146	0	EPI	MDK
14	0	1.8403	0.498	0.032	0	EPI	CLDN7
15	0	1.78148	0.487	0.066	0	EPI	S100A14
16	0	1.7813	0.564	0.117	0	EPI	C19orf33
17	0	1.76357	0.628	0.143	0	EPI	ELF3
18	0	1.73428	0.471	0.108	0	EPI	TSPAN8
19	0	1.72937	0.432	0.067	0	EPI	ASS1
20	1.72271e-283	2.45399	0.327	0.076	5.66616e-279	EPI	TFF3
21	3.65938e-283	2.1493	0.136	0.006	1.20361e-278	EPI	SERPINB3
22	1.57597e-272	2.53284	0.141	0.008	5.18352e-268	EPI	NTS
23	1.10863e-219	2.90768	0.165	0.021	3.64638e-215	EPI	SPINK4
24	2.78143e-215	3.00641	0.363	0.119	9.14839e-211	EPI	SERPINA1
25	1.70596e-209	2.14793	0.14	0.015	5.61108e-205	EPI	PCSK1N
26	4.90972e-197	1.71086	0.646	0.446	1.61486e-192	EPI	LGALS3
27	1.67056e-105	2.30374	0.26	0.106	5.49463e-101	EPI	S100A9
28	1.88091e-100	1.85692	0.182	0.059	6.18651e-96	EPI	ANPEP
29	1.87013e-78	3.38975	0.14	0.045	6.15105e-74	EPI	APOA1
30	5.47359e-08	2.46692	0.11	0.08	0.00180032	EPI	IGLV2-23
31	0	6.7567	0.786	0.166	0	EPI_B	PGC
32	0	6.26686	0.438	0.069	0	EPI_B	GKN1
33	0	5.8542	0.899	0.141	0	EPI_B	TFF2
34	0	5.48803	0.462	0.086	0	EPI_B	MUC6
35	0	5.13211	0.858	0.189	0	EPI_B	TFF1
36	0	5.12598	0.817	0.154	0	EPI_B	MUC5AC
37	0	4.4501	0.507	0.025	0	EPI_B	GKN2
38	0	4.24423	0.893	0.218	0	EPI_B	LYZ
39	0	4.14004	0.583	0.067	0	EPI_B	PSCA
40	0	3.80227	0.678	0.047	0	EPI_B	MSMB
41	0	3.44548	0.296	0.021	0	EPI_B	PRR4
42	0	3.42016	0.448	0.029	0	EPI_B	MUCL3
43	0	3.31244	0.766	0.105	0	EPI_B	SPINK1
44	0	3.11631	0.844	0.107	0	EPI_B	MUC1
45	0	3.06921	0.622	0.051	0	EPI_B	CAPN8
46	0	3.04836	0.879	0.18	0	EPI_B	AGR2
47	0	3.04585	0.801	0.093	0	EPI_B	CA2
48	0	3.02462	0.348	0.021	0	EPI_B	BPIFB1
49	0	2.98764	0.234	0.014	0	EPI_B	C6orf58
50	0	2.91402	0.904	0.296	0	EPI_B	CYSTM1
51	0	2.82663	0.763	0.061	0	EPI_B	CLDN18
52	0	2.72152	0.223	0.012	0	EPI_B	LTF
53	0	2.64547	0.752	0.154	0	EPI_B	S100P
54	0	2.61886	0.769	0.049	0	EPI_B	VSIG2
55	0	2.4757	0.673	0.054	0	EPI_B	CTSE
56	0	2.46433	0.528	0.097	0	EPI_B	LCN2
57	1.63201e-274	2.83813	0.374	0.089	5.36785e-270	EPI_B	REG1A
58	1.64695e-215	2.43809	0.607	0.333	5.41698e-211	EPI_B	FP671120.1
59	2.5057e-150	3.10558	0.146	0.022	8.24151e-146	EPI_B	REG3A
60	3.99893e-73	4.2373	0.159	0.05	1.31529e-68	EPI_B	LIPF
61	0	4.28165	0.884	0.022	0	Endo	PLVAP
62	0	3.90153	0.681	0.042	0	Endo	SERPINE1
63	0	3.68459	0.874	0.095	0	Endo	HSPG2
64	0	3.67951	0.881	0.034	0	Endo	RAMP2
65	0	3.5773	0.913	0.109	0	Endo	PECAM1
66	0	3.52924	0.813	0.013	0	Endo	VWF
67	0	3.52892	0.966	0.148	0	Endo	IGFBP7
68	0	3.38282	0.912	0.08	0	Endo	SPARCL1
69	0	3.371	0.771	0.061	0	Endo	COL4A1
70	0	3.29838	0.795	0.08	0	Endo	COL4A2
71	0	3.27013	0.912	0.11	0	Endo	CRIP2
72	0	3.14627	0.411	0.008	0	Endo	ACKR1
73	0	3.13026	0.842	0.055	0	Endo	GNG11
74	0	2.93138	0.697	0.033	0	Endo	COL15A1
75	0	2.90147	0.866	0.093	0	Endo	A2M
76	0	2.86323	0.668	0.104	0	Endo	SLC9A3R2
77	0	2.83919	0.806	0.065	0	Endo	ENG
78	0	2.80647	0.787	0.025	0	Endo	EGFL7
79	0	2.80446	0.759	0.018	0	Endo	CALCRL
80	0	2.79702	0.737	0.107	0	Endo	SPRY1
81	0	2.78791	0.744	0.01	0	Endo	RAMP3
82	0	2.73678	0.843	0.103	0	Endo	SPARC
83	0	2.73364	0.582	0.008	0	Endo	CLDN5
84	0	2.70244	0.783	0.131	0	Endo	TCF4
85	0	2.69226	0.736	0.053	0	Endo	HYAL2
86	0	2.63336	0.766	0.095	0	Endo	PRSS23
87	0	2.58171	0.299	0.007	0	Endo	SELE
88	0	2.54683	0.792	0.138	0	Endo	TM4SF1
89	0	2.50782	0.797	0.11	0	Endo	EPAS1
90	1.48518e-194	2.63335	0.503	0.148	4.88491e-190	Endo	CD320
91	0	4.93521	0.432	0.02	0	Fib	CXCL14
92	0	4.8539	0.737	0.028	0	Fib	DCN
93	0	4.79545	0.507	0.097	0	Fib	CFD
94	0	4.58843	0.841	0.042	0	Fib	COL1A1
95	0	4.49178	0.609	0.052	0	Fib	TAGLN
96	0	4.45972	0.623	0.019	0	Fib	LUM
97	0	4.35505	0.863	0.027	0	Fib	COL1A2
98	0	4.28005	0.827	0.025	0	Fib	COL3A1
99	0	4.11269	0.378	0.025	0	Fib	APOD
100	0	4.04196	0.637	0.087	0	Fib	MGP
101	0	3.92061	0.581	0.06	0	Fib	ACTA2
102	0	3.79515	0.909	0.067	0	Fib	CALD1
103	0	3.77188	0.799	0.075	0	Fib	MYL9
104	0	3.74219	0.633	0.03	0	Fib	IGFBP5
105	0	3.73796	0.353	0.026	0	Fib	RGS5
106	0	3.67404	0.731	0.035	0	Fib	RARRES2
107	0	3.58489	0.605	0.009	0	Fib	MFAP4
108	0	3.55736	0.603	0.064	0	Fib	CTGF
109	0	3.50859	0.778	0.032	0	Fib	C1S
110	0	3.50682	0.877	0.06	0	Fib	COL6A2
111	0	3.46491	0.393	0.017	0	Fib	POSTN
112	0	3.4263	0.787	0.062	0	Fib	TPM2
113	0	3.37962	0.239	0.009	0	Fib	SFRP2
114	0	3.36173	0.797	0.057	0	Fib	SERPING1
115	0	3.33791	0.5	0.015	0	Fib	FBLN1
116	0	3.30299	0.926	0.143	0	Fib	IGFBP7
117	0	3.26846	0.714	0.018	0	Fib	SOD3
118	0	3.19306	0.88	0.093	0	Fib	SPARC
119	0	3.12953	0.531	0.025	0	Fib	IGFBP6
120	0	3.12154	0.632	0.03	0	Fib	SERPINF1
121	0	6.12216	0.41	0.067	0	Plasma	IGLV6-57
122	0	5.91643	0.892	0.171	0	Plasma	JCHAIN
123	0	5.45973	0.671	0.121	0	Plasma	IGKC
124	0	5.35214	0.73	0.1	0	Plasma	IGHA1
125	0	5.31466	0.44	0.077	0	Plasma	IGHG1
126	0	5.28529	0.779	0.082	0	Plasma	IGLL5
127	4.78623e-234	6.33069	0.338	0.067	1.57424e-229	Plasma	IGHV4-34
128	7.07938e-195	5.97373	0.269	0.048	2.32848e-190	Plasma	IGKV1-12
129	4.92603e-170	4.97609	0.187	0.026	1.62022e-165	Plasma	IGKV1-9
130	9.40693e-149	5.5189	0.189	0.032	3.09403e-144	Plasma	IGKV1-39
131	1.22389e-142	5.45493	0.47	0.158	4.02549e-138	Plasma	IGKV4-1
132	2.4965e-142	5.6919	0.174	0.027	8.21125e-138	Plasma	IGKV1-17
133	2.34351e-128	5.89265	0.45	0.162	7.70802e-124	Plasma	IGKV1-5
134	2.0055e-110	5.02133	0.16	0.031	6.59629e-106	Plasma	IGHV4-59
135	8.32012e-110	5.13859	0.326	0.101	2.73657e-105	Plasma	IGKV3-11
136	4.58315e-108	5.04833	0.154	0.029	1.50744e-103	Plasma	IGKV1D-39
137	6.29346e-108	5.25805	0.322	0.099	2.06998e-103	Plasma	IGKV3-15
138	6.88973e-103	4.91014	0.498	0.2	2.2661e-98	Plasma	IGKV3-20
139	4.45957e-90	5.73873	0.204	0.054	1.4668e-85	Plasma	IGLV2-11
140	2.4663e-88	4.94076	0.164	0.038	8.11192e-84	Plasma	IGHV3-7
141	4.5659e-81	5.57507	0.197	0.056	1.50177e-76	Plasma	IGHV3-30
142	8.5804e-80	4.87527	0.125	0.025	2.82218e-75	Plasma	IGHV1-3
143	5.44661e-75	5.34928	0.133	0.03	1.79144e-70	Plasma	IGHV3-48
144	8.83798e-68	5.1273	0.156	0.043	2.9069e-63	Plasma	IGHV1-69D
145	1.40851e-60	5.1438	0.159	0.046	4.63273e-56	Plasma	IGKV2-30
146	4.18659e-53	5.81235	0.311	0.132	1.37701e-48	Plasma	IGLV2-14
147	1.80621e-36	5.61586	0.121	0.041	5.94082e-32	Plasma	IGLV7-46
148	5.56771e-31	5.23991	0.134	0.052	1.83128e-26	Plasma	IGHV5-51
149	5.44887e-22	5.80231	0.127	0.055	1.79219e-17	Plasma	IGLV3-19
150	1.01164e-20	5.42698	0.105	0.045	3.32738e-16	Plasma	IGLV3-21
151	0	4.95564	0.549	0.071	0	Mono/Mac	G0S2
152	0	4.32443	0.479	0.058	0	Mono/Mac	CXCL8
153	0	4.25189	0.96	0.101	0	Mono/Mac	TYROBP
154	0	4.06847	0.439	0.022	0	Mono/Mac	IL1B
155	0	3.98347	0.416	0.025	0	Mono/Mac	C1QB
156	0	3.97711	0.434	0.023	0	Mono/Mac	C1QA
157	0	3.95154	0.54	0.063	0	Mono/Mac	S100A8
158	0	3.85777	0.406	0.023	0	Mono/Mac	C1QC
159	0	3.71784	0.846	0.071	0	Mono/Mac	FCER1G
160	0	3.59012	0.802	0.033	0	Mono/Mac	AIF1
161	0	3.58146	0.993	0.921	0	Mono/Mac	FTL
162	0	3.57971	0.998	0.948	0	Mono/Mac	FTH1
163	0	3.3988	0.793	0.283	0	Mono/Mac	SOD2
164	0	3.32614	0.401	0.064	0	Mono/Mac	CCL3
165	0	3.22468	0.73	0.305	0	Mono/Mac	CTSB
166	0	3.20658	0.752	0.251	0	Mono/Mac	NAMPT
167	0	3.10123	0.645	0.118	0	Mono/Mac	BCL2A1
168	0	2.9685	0.689	0.135	0	Mono/Mac	PLAUR
169	0	2.84563	0.975	0.74	0	Mono/Mac	SAT1
170	0	2.78289	0.671	0.086	0	Mono/Mac	S100A9
171	0	2.7551	0.727	0.059	0	Mono/Mac	SPI1
172	0	2.71865	0.345	0.037	0	Mono/Mac	IL1RN
173	6.56643e-303	3.34103	0.335	0.05	2.15977e-298	Mono/Mac	APOC1
174	8.35725e-272	2.70209	0.457	0.108	2.74878e-267	Mono/Mac	C15orf48
175	9.63942e-254	2.68846	0.301	0.046	3.1705e-249	Mono/Mac	CCL3L1
176	7.44154e-250	2.70645	0.709	0.415	2.4476e-245	Mono/Mac	GPX1P1
177	4.88642e-192	2.8879	0.703	0.367	1.60719e-187	Mono/Mac	TIMP1
178	5.34235e-192	3.22956	0.339	0.08	1.75715e-187	Mono/Mac	APOE
179	9.52961e-183	2.6412	0.274	0.054	3.13438e-178	Mono/Mac	IL1R2
180	1.59674e-67	2.67465	0.104	0.02	5.25184e-63	Mono/Mac	CXCL5
181	0	7.40897	1	0.024	0	Mast	TPSAB1
182	0	6.32204	0.775	0.011	0	Mast	TPSB2
183	0	6.02229	0.969	0.01	0	Mast	CPA3
184	0	5.08137	0.675	0.003	0	Mast	TPSD1
185	0	4.19319	0.917	0.013	0	Mast	GATA2
186	0	4.03821	0.882	0.012	0	Mast	KIT
187	0	3.60649	0.896	0.044	0	Mast	LTC4S
188	0	3.29733	0.83	0.005	0	Mast	HPGDS
189	0	3.18429	0.792	0.043	0	Mast	VWA5A
190	0	3.10234	0.74	0.003	0	Mast	HDC
191	0	3.00136	0.92	0.147	0	Mast	CLU
192	0	2.8458	0.747	0.004	0	Mast	SLC18A2
193	0	2.7064	0.616	0.002	0	Mast	MS4A2
194	0	2.70058	0.616	0.015	0	Mast	SLC24A3
195	0	2.54036	0.709	0.008	0	Mast	IL1RL1
196	0	2.42568	0.727	0.064	0	Mast	ALOX5
197	0	2.26658	0.564	0.005	0	Mast	RHEX
198	0	2.23666	0.644	0.035	0	Mast	PTGS1
199	0	2.23287	0.201	0.002	0	Mast	CTSG
200	0	2.22977	0.633	0.018	0	Mast	MAOB
201	4.38562e-227	2.50307	0.54	0.064	1.44247e-222	Mast	CSF1
202	4.47663e-224	2.55173	0.931	0.242	1.47241e-219	Mast	ALOX5AP
203	8.85173e-207	2.56684	0.879	0.234	2.91142e-202	Mast	CD9
204	6.49827e-157	2.31212	0.886	0.293	2.13735e-152	Mast	GLUL
205	4.15812e-141	2.38603	0.993	0.668	1.36765e-136	Mast	VIM
206	5.53578e-136	2.32422	0.92	0.391	1.82077e-131	Mast	ANXA1
207	1.83531e-132	3.19513	0.734	0.218	6.03653e-128	Mast	AREG
208	8.84963e-121	2.51788	0.882	0.398	2.91073e-116	Mast	LMNA
209	6.50318e-120	2.57163	0.723	0.233	2.13896e-115	Mast	SOCS1
210	2.97292e-110	2.30849	0.83	0.369	9.77823e-106	Mast	NFKBIZ
211	0	3.06841	0.879	0.027	0	B	MS4A1
212	0	2.89918	0.997	0.329	0	B	HLA-DRA
213	0	2.88369	0.819	0.148	0	B	CD83
214	0	2.79671	0.927	0.128	0	B	CD79A
215	0	2.69221	1	0.765	0	B	CD74
216	0	2.55735	0.738	0.029	0	B	BANK1
217	0	2.50978	0.702	0.026	0	B	VPREB3
218	0	2.33847	0.937	0.37	0	B	CD37
219	0	2.31601	0.896	0.184	0	B	HLA-DQA1
220	0	2.31541	0.897	0.214	0	B	HLA-DQB1
221	0	2.14749	0.962	0.319	0	B	HLA-DPB1
222	0	2.07361	0.97	0.367	0	B	HLA-DPA1
223	0	2.04692	0.927	0.376	0	B	CXCR4
224	0	2.01052	0.982	0.404	0	B	HLA-DRB1
225	0	1.93747	0.656	0.134	0	B	MEF2C
226	0	1.89389	0.592	0.087	0	B	IRF8
227	0	1.84682	0.467	0.018	0	B	LINC00926
228	0	1.80833	0.538	0.089	0	B	CD79B
229	0	1.7475	0.898	0.347	0	B	CD52
230	0	1.74645	0.506	0.044	0	B	CD19
231	0	1.72265	0.541	0.118	0	B	ADAM28
232	0	1.71399	0.581	0.16	0	B	SMIM14
233	0	1.63386	0.998	0.923	0	B	RPS27
234	0	1.60892	0.431	0.082	0	B	LY9
235	0	1.60008	0.758	0.192	0	B	LTB
236	0	1.59023	0.412	0.025	0	B	TNFRSF13C
237	0	1.58605	0.47	0.035	0	B	LY86
238	0	1.58119	0.385	0.019	0	B	NAPSB
239	0	1.5694	0.444	0.024	0	B	FCRLA
240	6.66035e-290	1.61647	0.971	0.818	2.19066e-285	B	RPL21
241	0	3.38039	0.903	0.021	0	B_MKI67	TCL1A
242	0	3.0997	0.918	0.088	0	B_MKI67	MS4A1
243	0	3.08413	0.913	0.073	0	B_MKI67	VPREB3
244	0	2.76511	0.643	0.015	0	B_MKI67	KIAA0101
245	0	2.75666	0.821	0.016	0	B_MKI67	RGS13
246	0	2.30196	0.872	0.078	0	B_MKI67	LRMP
247	4.56445e-290	3.02805	0.918	0.117	1.50129e-285	B_MKI67	CD79B
248	1.08979e-281	1.99925	0.628	0.049	3.58444e-277	B_MKI67	TK1
249	2.31025e-214	2.00238	0.791	0.102	7.59864e-210	B_MKI67	HLA-DMB
250	8.8617e-205	2.84389	0.959	0.186	2.9147e-200	B_MKI67	CD79A
251	1.01644e-174	3.26686	0.893	0.197	3.34319e-170	B_MKI67	STMN1
252	7.09759e-173	2.79387	0.73	0.119	2.33447e-168	B_MKI67	ATP5L
253	8.42848e-143	2.56003	0.73	0.137	2.77221e-138	B_MKI67	GNB2L1
254	1.37789e-142	2.32756	0.913	0.274	4.53201e-138	B_MKI67	PARP1
255	8.09853e-126	2.70095	0.985	0.516	2.66369e-121	B_MKI67	HMGN1
256	2.49357e-114	2.21253	0.964	0.43	8.20161e-110	B_MKI67	ANP32B
257	9.00674e-114	2.20699	0.969	0.428	2.96241e-109	B_MKI67	CORO1A
258	9.37706e-107	2.08493	0.98	0.378	3.08421e-102	B_MKI67	HLA-DRA
259	1.22843e-106	3.20694	0.944	0.483	4.04042e-102	B_MKI67	HMGN2
260	3.79646e-102	3.11994	0.872	0.346	1.24869e-97	B_MKI67	HMGB2
261	2.97479e-99	2.11263	0.99	0.703	9.78437e-95	B_MKI67	HNRNPA1
262	3.88739e-98	2.7907	0.939	0.45	1.2786e-93	B_MKI67	TUBB
263	5.67818e-98	2.73857	0.99	0.719	1.86761e-93	B_MKI67	HMGB1
264	4.92869e-97	2.72669	0.959	0.524	1.6211e-92	B_MKI67	H2AFZ
265	1.67975e-92	2.01529	0.985	0.803	5.52485e-88	B_MKI67	H3F3A
266	4.96579e-85	2.126	0.796	0.288	1.6333e-80	B_MKI67	DUT
267	3.35643e-67	2.36591	0.857	0.46	1.10396e-62	B_MKI67	RPS20
268	3.47692e-67	2.76067	0.878	0.563	1.1436e-62	B_MKI67	TUBA1B
269	8.76821e-62	3.51053	0.832	0.456	2.88395e-57	B_MKI67	HIST1H4C
270	1.02308e-55	2.15309	0.893	0.645	3.36501e-51	B_MKI67	RPL27A
271	0	2.43541	0.761	0.053	0	T_MKI67	TYMS
272	0	1.66695	0.601	0.031	0	T_MKI67	RRM2
273	2.94224e-265	2.08146	0.558	0.033	9.67734e-261	T_MKI67	HIST1H1B
274	3.51213e-263	1.98905	0.675	0.05	1.15517e-258	T_MKI67	UBE2C
275	1.61466e-257	1.98029	0.693	0.054	5.31078e-253	T_MKI67	MKI67
276	3.44378e-219	1.73877	0.626	0.052	1.13269e-214	T_MKI67	NUSAP1
277	2.67995e-210	1.67343	0.577	0.045	8.81461e-206	T_MKI67	TOP2A
278	1.50241e-184	1.59005	0.552	0.047	4.94159e-180	T_MKI67	CENPF
279	5.3178e-163	2.15887	0.558	0.054	1.74908e-158	T_MKI67	HIST1H2AI
280	1.84427e-154	3.21274	0.908	0.199	6.06598e-150	T_MKI67	STMN1
281	1.9611e-113	1.62781	0.73	0.132	6.45025e-109	T_MKI67	PTTG1
282	3.21944e-100	2.84313	0.969	0.451	1.05891e-95	T_MKI67	TUBB
283	3.17346e-99	2.92164	0.994	0.562	1.04378e-94	T_MKI67	TUBA1B
284	3.06463e-90	2.55583	0.89	0.347	1.00799e-85	T_MKI67	HMGB2
285	3.14974e-79	2.30335	0.92	0.484	1.03598e-74	T_MKI67	HMGN2
286	3.13159e-77	1.73705	1	0.87	1.03001e-72	T_MKI67	PFN1
287	1.00457e-73	2.10859	0.926	0.525	3.30412e-69	T_MKI67	H2AFZ
288	5.54633e-72	1.67597	1	0.964	1.82424e-67	T_MKI67	ACTB
289	7.6324e-70	3.03326	0.914	0.456	2.51037e-65	T_MKI67	HIST1H4C
290	1.8747e-65	1.74187	0.92	0.43	6.16608e-61	T_MKI67	CORO1A
291	1.55837e-64	1.6394	0.951	0.72	5.12564e-60	T_MKI67	HMGB1
292	6.07159e-64	1.78058	0.865	0.438	1.99701e-59	T_MKI67	H2AFV
293	1.90429e-62	1.73028	0.779	0.29	6.26341e-58	T_MKI67	DUT
294	7.9384e-57	1.99482	0.626	0.166	2.61102e-52	T_MKI67	GZMA
295	4.17967e-48	2.22203	0.748	0.319	1.37474e-43	T_MKI67	HIST1H1E
296	5.0327e-48	1.72904	0.742	0.314	1.65531e-43	T_MKI67	UBE2S
297	1.09185e-47	1.70444	0.534	0.139	3.5912e-43	T_MKI67	GZMB
298	4.17621e-47	1.57319	0.877	0.465	1.3736e-42	T_MKI67	COTL1
299	5.10637e-40	1.94021	0.227	0.033	1.67953e-35	T_MKI67	CXCL13
300	3.35474e-37	2.15913	0.356	0.081	1.10341e-32	T_MKI67	GNLY
301	0	3.75344	0.586	0.087	0	T	CCL5
302	0	3.27986	0.469	0.141	0	T	CCL4
303	0	3.24492	0.868	0.05	0	T	CD3E
304	0	3.24316	0.762	0.058	0	T	CD7
305	0	3.21768	0.614	0.067	0	T	IL7R
306	0	3.11426	0.784	0.033	0	T	CD3D
307	0	3.06089	0.479	0.059	0	T	NKG7
308	0	2.80439	0.895	0.289	0	T	IL32
309	0	2.80294	0.469	0.038	0	T	GZMA
310	0	2.72588	0.733	0.036	0	T	CD2
311	0	2.50123	0.377	0.039	0	T	GZMB
312	0	2.45887	0.423	0.022	0	T	KLRB1
313	0	2.37899	0.552	0.056	0	T	CST7
314	0	2.25355	0.685	0.237	0	T	DUSP2
315	0	2.18523	0.225	0.012	0	T	GZMK
316	0	2.17385	0.851	0.243	0	T	PTPRC
317	0	2.11752	0.719	0.488	0	T	DNAJB1
318	0	2.10145	0.702	0.158	0	T	FYN
319	0	2.09361	0.58	0.024	0	T	CD3G
320	0	2.05538	0.719	0.184	0	T	EVL
321	0	2.03985	0.689	0.144	0	T	HCST
322	0	1.99734	0.361	0.023	0	T	PRF1
323	0	1.97789	0.757	0.469	0	T	SARAF
324	0	1.97719	0.697	0.222	0	T	LEPROTL1
325	0	1.95522	0.535	0.053	0	T	SPOCK2
326	0	1.95203	0.328	0.016	0	T	CD8A
327	0	1.94618	0.606	0.051	0	T	LCK
328	4.08005e-236	2.93074	0.295	0.095	1.34197e-231	T	CCL4L2
329	4.44549e-186	2.87626	0.18	0.041	1.46217e-181	T	GNLY
330	4.08758e-44	2.19856	0.502	0.494	1.34444e-39	T	HSPA1A

## Sheet: Supplemental table S3
Supplementary Table S3, the top 30 DEGs of 11 T and NK subclusters
	p_val	avg_log2FC	pct.1	pct.2	p_val_adj	cluster	gene
FCER1G	1.22349e-40	3.32837	1	0.021	4.02418e-36	NK1	FCER1G
KLRF2	5.58875e-23	0.883922	0.333	0	1.8382e-18	NK1	KLRF2
ADGRG3	5.58875e-23	0.814496	0.333	0	1.8382e-18	NK1	ADGRG3
LAT2	8.30188e-21	2.22297	0.778	0.038	2.73057e-16	NK1	LAT2
TYROBP	1.08328e-18	3.15564	0.889	0.065	3.56302e-14	NK1	TYROBP
CXXC5	2.17843e-17	1.01985	0.333	0.003	7.16508e-13	NK1	CXXC5
B3GNT7	2.17843e-17	0.87512	0.333	0.003	7.16508e-13	NK1	B3GNT7
FES	3.45874e-17	1.07655	0.444	0.01	1.13761e-12	NK1	FES
KRT86	6.06882e-17	1.95169	0.556	0.021	1.9961e-12	NK1	KRT86
KRT81	8.89958e-16	1.35976	0.222	0	2.92716e-11	NK1	KRT81
TPTE2P6	8.89958e-16	1.06288	0.222	0	2.92716e-11	NK1	TPTE2P6
NKIRAS1	8.89958e-16	0.771542	0.222	0	2.92716e-11	NK1	NKIRAS1
BANK1	8.89958e-16	0.699504	0.222	0	2.92716e-11	NK1	BANK1
RASSF1-AS1	8.89958e-16	0.643472	0.222	0	2.92716e-11	NK1	RASSF1-AS1
NCR2	8.89958e-16	0.558174	0.222	0	2.92716e-11	NK1	NCR2
NCR1	2.97978e-15	1.29301	0.444	0.014	9.8008e-11	NK1	NCR1
PRKAR2B	4.65757e-15	1.19899	0.444	0.014	1.53192e-10	NK1	PRKAR2B
SH2D1B	6.49774e-15	1.02041	0.444	0.014	2.13717e-10	NK1	SH2D1B
MICAL3	8.64184e-14	0.922253	0.333	0.007	2.84239e-09	NK1	MICAL3
KIR2DL4	2.11174e-12	2.41362	0.778	0.086	6.94571e-08	NK1	KIR2DL4
SPECC1	2.66063e-12	1.48218	0.444	0.021	8.75109e-08	NK1	SPECC1
TRDC	6.71409e-12	1.906	0.556	0.038	2.20833e-07	NK1	TRDC
C8orf82	9.00376e-12	1.38823	0.333	0.01	2.96143e-07	NK1	C8orf82
ADAMTS17	3.73022e-11	1.34624	0.444	0.024	1.22691e-06	NK1	ADAMTS17
SIGLEC17P	1.10351e-10	0.560955	0.222	0.003	3.62956e-06	NK1	SIGLEC17P
NCAM1	1.33884e-10	0.818101	0.444	0.024	4.40357e-06	NK1	NCAM1
EXO5	7.88953e-10	0.695879	0.333	0.014	2.59495e-05	NK1	EXO5
BCL3	1.20113e-09	1.82693	0.889	0.144	3.95063e-05	NK1	BCL3
NFIL3	4.21009e-09	1.59234	0.889	0.144	0.000138474	NK1	NFIL3
CYSLTR1	6.03773e-09	0.99238	0.333	0.017	0.000198587	NK1	CYSLTR1
ERLIN1	8.42191e-09	0.96273	0.333	0.017	0.000277005	NK1	ERLIN1
MVK	9.93534e-09	0.94959	0.333	0.017	0.000326783	NK1	MVK
PTPN12	9.93534e-09	0.863293	0.333	0.017	0.000326783	NK1	PTPN12
LANCL3	1.45574e-08	0.807974	0.111	0	0.000478806	NK1	LANCL3
AGRN	1.45574e-08	0.745609	0.111	0	0.000478806	NK1	AGRN
CNR2	1.45574e-08	0.552725	0.111	0	0.000478806	NK1	CNR2
ZBTB47	1.45574e-08	0.552725	0.111	0	0.000478806	NK1	ZBTB47
CPNE5	1.45574e-08	0.552725	0.111	0	0.000478806	NK1	CPNE5
SLC16A2	1.45574e-08	0.552725	0.111	0	0.000478806	NK1	SLC16A2
ZG16B	1.45574e-08	0.552725	0.111	0	0.000478806	NK1	ZG16B
RP11-782C8.1	1.45574e-08	0.552725	0.111	0	0.000478806	NK1	RP11-782C8.1
RP11-440L14.4	1.45574e-08	0.552725	0.111	0	0.000478806	NK1	RP11-440L14.4
SEPP1	1.45574e-08	0.552725	0.111	0	0.000478806	NK1	SEPP1
RP11-37B2.1	1.45574e-08	0.552725	0.111	0	0.000478806	NK1	RP11-37B2.1
RN7SL1	1.45574e-08	0.552725	0.111	0	0.000478806	NK1	RN7SL1
EIF3J-AS1	1.45574e-08	0.552725	0.111	0	0.000478806	NK1	EIF3J-AS1
RP5-1112D6.4	1.45574e-08	0.552725	0.111	0	0.000478806	NK1	RP5-1112D6.4
FAM188B	1.45574e-08	0.552725	0.111	0	0.000478806	NK1	FAM188B
AC022182.3	1.45574e-08	0.552725	0.111	0	0.000478806	NK1	AC022182.3
RP11-452L6.5	1.45574e-08	0.552725	0.111	0	0.000478806	NK1	RP11-452L6.5
LINC00176	1.45574e-08	0.552725	0.111	0	0.000478806	NK1	LINC00176
KB-1208A12.3	1.45574e-08	0.552725	0.111	0	0.000478806	NK1	KB-1208A12.3
AC132872.3	1.45574e-08	0.53373	0.111	0	0.000478806	NK1	AC132872.3
SOST	1.45574e-08	0.533551	0.111	0	0.000478806	NK1	SOST
AC009303.2	1.45574e-08	0.459825	0.111	0	0.000478806	NK1	AC009303.2
SHROOM1	1.45574e-08	0.459825	0.111	0	0.000478806	NK1	SHROOM1
HLA-L	1.45574e-08	0.459825	0.111	0	0.000478806	NK1	HLA-L
AC009630.1	1.45574e-08	0.459825	0.111	0	0.000478806	NK1	AC009630.1
AP002518.2	1.45574e-08	0.459825	0.111	0	0.000478806	NK1	AP002518.2
LRRC43	1.45574e-08	0.459825	0.111	0	0.000478806	NK1	LRRC43
ADCK1	1.45574e-08	0.459825	0.111	0	0.000478806	NK1	ADCK1
TEX22	1.45574e-08	0.459825	0.111	0	0.000478806	NK1	TEX22
IGHG2	1.45574e-08	0.459825	0.111	0	0.000478806	NK1	IGHG2
MEX3B	1.45574e-08	0.459825	0.111	0	0.000478806	NK1	MEX3B
AC104971.1	1.45574e-08	0.459825	0.111	0	0.000478806	NK1	AC104971.1
AC020917.4	1.45574e-08	0.459825	0.111	0	0.000478806	NK1	AC020917.4
AC254562.3	1.45574e-08	0.459825	0.111	0	0.000478806	NK1	AC254562.3
ANO7	1.45574e-08	0.457312	0.111	0	0.000478806	NK1	ANO7
C3orf86	1.45574e-08	0.457312	0.111	0	0.000478806	NK1	C3orf86
WDR41	1.45574e-08	0.457312	0.111	0	0.000478806	NK1	WDR41
LINC01232	1.45574e-08	0.457312	0.111	0	0.000478806	NK1	LINC01232
MUC5B-AS1	1.45574e-08	0.457312	0.111	0	0.000478806	NK1	MUC5B-AS1
GOT2P3	1.45574e-08	0.457312	0.111	0	0.000478806	NK1	GOT2P3
TAL1	1.45574e-08	0.420446	0.111	0	0.000478806	NK1	TAL1
RPL23AP7	1.45574e-08	0.420446	0.111	0	0.000478806	NK1	RPL23AP7
WASF1	1.45574e-08	0.420446	0.111	0	0.000478806	NK1	WASF1
PPP1R9A	1.45574e-08	0.420446	0.111	0	0.000478806	NK1	PPP1R9A
AC004917.1	1.45574e-08	0.420446	0.111	0	0.000478806	NK1	AC004917.1
AL359644.1	1.45574e-08	0.420446	0.111	0	0.000478806	NK1	AL359644.1
TMSB4XP4	1.45574e-08	0.420446	0.111	0	0.000478806	NK1	TMSB4XP4
PYCARD-AS1	1.45574e-08	0.420446	0.111	0	0.000478806	NK1	PYCARD-AS1
ZFP3	1.45574e-08	0.420446	0.111	0	0.000478806	NK1	ZFP3
AC005562.1	1.45574e-08	0.420446	0.111	0	0.000478806	NK1	AC005562.1
CPXM1	1.45574e-08	0.420446	0.111	0	0.000478806	NK1	CPXM1
AL139099.4	1.45574e-08	0.420446	0.111	0	0.000478806	NK1	AL139099.4
CEBPD	2.21771e-08	2.36692	0.889	0.175	0.000729429	NK1	CEBPD
GTF2E1	2.58371e-08	0.842297	0.222	0.007	0.000849807	NK1	GTF2E1
EPS8L1	2.8913e-08	0.750809	0.222	0.007	0.000950977	NK1	EPS8L1
NCR3	3.03218e-08	1.33926	0.556	0.062	0.000997315	NK1	NCR3
PTGDR	3.61663e-08	0.699677	0.222	0.007	0.00118954	NK1	PTGDR
AC092821.3	3.61663e-08	0.645246	0.222	0.007	0.00118954	NK1	AC092821.3
ZNF419	4.04264e-08	0.640981	0.222	0.007	0.00132966	NK1	ZNF419
HDGFL3	4.04264e-08	0.541189	0.222	0.007	0.00132966	NK1	HDGFL3
HES6	4.04264e-08	0.503764	0.222	0.007	0.00132966	NK1	HES6
RFC2	1.0634e-07	0.90917	0.444	0.041	0.00349764	NK1	RFC2
ETS2	1.93659e-07	1.22348	0.444	0.041	0.00636965	NK1	ETS2
HOPX	2.17312e-07	1.81261	1	0.244	0.00714762	NK1	HOPX
GFOD1	2.35621e-07	1.20557	0.556	0.069	0.00774982	NK1	GFOD1
CDKAL1	4.11949e-07	0.928867	0.444	0.045	0.0135494	NK1	CDKAL1
FUCA1	4.27763e-07	0.856831	0.333	0.024	0.0140696	NK1	FUCA1
ERICH6-AS1	4.27763e-07	0.792884	0.333	0.024	0.0140696	NK1	ERICH6-AS1
SCYL3	4.27763e-07	0.767423	0.333	0.024	0.0140696	NK1	SCYL3
FARSA	4.97284e-07	1.24182	0.667	0.113	0.0163562	NK1	FARSA
GNLY	5.23287e-07	3.59731	0.778	0.189	0.0172114	NK1	GNLY
CCDC159	5.44865e-07	0.961323	0.444	0.045	0.0179211	NK1	CCDC159
AREG	6.2265e-07	2.24193	0.778	0.165	0.0204796	NK1	AREG
ZBTB16	6.65725e-07	1.40905	0.556	0.076	0.0218964	NK1	ZBTB16
SLC39A7	6.86418e-07	1.04617	0.556	0.072	0.022577	NK1	SLC39A7
NFYA	7.55564e-07	0.856673	0.444	0.045	0.0248512	NK1	NFYA
CYSLTR2	8.37071e-07	0.676048	0.222	0.01	0.0275321	NK1	CYSLTR2
ITGA1	8.86394e-07	1.47839	0.778	0.137	0.0291544	NK1	ITGA1
TBC1D24	1.09507e-06	0.615891	0.222	0.01	0.0360181	NK1	TBC1D24
PEX5	1.09507e-06	0.603152	0.222	0.01	0.0360181	NK1	PEX5
AL354733.3	1.09507e-06	0.602642	0.222	0.01	0.0360181	NK1	AL354733.3
FBP1	1.19696e-06	0.720866	0.222	0.01	0.0393691	NK1	FBP1
ZNF836	1.19696e-06	0.505808	0.222	0.01	0.0393691	NK1	ZNF836
C1RL-AS1	1.30792e-06	0.888615	0.222	0.01	0.0430189	NK1	C1RL-AS1
ICAM1	1.50943e-06	1.28356	0.556	0.076	0.0496465	NK1	ICAM1
PLPP1	1.57868e-06	1.31217	0.556	0.079	0.0519244	NK1	PLPP1
KLRC1	2.66256e-06	2.35585	0.667	0.131	0.0875742	NK1	KLRC1
CLIC3	4.27783e-06	1.69346	0.778	0.192	0.140702	NK1	CLIC3
MEX3C	5.64429e-06	0.753379	0.333	0.031	0.185646	NK1	MEX3C
MPND	5.96004e-06	0.84064	0.333	0.031	0.196032	NK1	MPND
SERTAD3	6.85757e-06	0.850419	0.444	0.055	0.225552	NK1	SERTAD3
DGKD	8.12099e-06	0.80387	0.444	0.055	0.267107	NK1	DGKD
CD3D	9.35737e-06	-3.61899	0	0.866	0.307773	NK1	CD3D
TNFRSF18	9.37407e-06	1.74075	0.778	0.206	0.308322	NK1	TNFRSF18
KIFC3	1.08127e-05	0.778934	0.222	0.014	0.355641	NK1	KIFC3
INTS9	1.08127e-05	0.640434	0.222	0.014	0.355641	NK1	INTS9
SYNGR1	1.11932e-05	1.25153	0.444	0.058	0.368156	NK1	SYNGR1
NUDT3	1.16212e-05	1.04769	0.667	0.131	0.382232	NK1	NUDT3
GPR55	1.16434e-05	0.619626	0.222	0.014	0.382965	NK1	GPR55
SART1	1.24587e-05	0.873173	0.556	0.086	0.40978	NK1	SART1
OSGEPL1	1.25349e-05	0.799844	0.222	0.014	0.412285	NK1	OSGEPL1
NACC1	1.25349e-05	0.594709	0.222	0.014	0.412285	NK1	NACC1
RAB39B	1.31539e-05	0.899569	0.333	0.034	0.432646	NK1	RAB39B
ATAD3A	1.34912e-05	0.492219	0.222	0.014	0.44374	NK1	ATAD3A
KMT2D	1.38347e-05	0.797928	0.333	0.034	0.455036	NK1	KMT2D
GUSBP1	1.56167e-05	0.530933	0.222	0.014	0.51365	NK1	GUSBP1
HSCB	1.56167e-05	0.498184	0.222	0.014	0.51365	NK1	HSCB
ZSCAN29	1.56167e-05	0.489221	0.222	0.014	0.51365	NK1	ZSCAN29
CYB561D2.1	1.56167e-05	0.46797	0.222	0.014	0.51365	NK1	CYB561D2.1
PHLDA3	1.56167e-05	0.434003	0.222	0.014	0.51365	NK1	PHLDA3
DUSP6	1.60843e-05	0.848854	0.333	0.034	0.529029	NK1	DUSP6
MTG2	1.77734e-05	0.706019	0.333	0.034	0.584585	NK1	MTG2
PARP3	1.96306e-05	0.719891	0.333	0.034	0.645672	NK1	PARP3
TAF6	1.96477e-05	0.8334	0.444	0.062	0.646233	NK1	TAF6
WARS	2.06272e-05	0.753512	0.333	0.034	0.67845	NK1	WARS
MFN1	2.06272e-05	0.711484	0.333	0.034	0.67845	NK1	MFN1
NTMT1	2.11775e-05	0.965887	0.667	0.134	0.696549	NK1	NTMT1
MCTP2	2.44063e-05	1.04102	0.444	0.065	0.802748	NK1	MCTP2
ATP8B4	2.56583e-05	1.26007	0.444	0.069	0.843929	NK1	ATP8B4
CTSW	3.16433e-05	1.87447	0.889	0.292	1	NK1	CTSW
NFU1	4.09917e-05	0.923049	0.444	0.065	1	NK1	NFU1
HIP1	4.69337e-05	1.16782	0.333	0.041	1	NK1	HIP1
MATK	5.14435e-05	1.79786	0.667	0.148	1	NK1	MATK
ABHD15	5.26857e-05	0.595873	0.222	0.017	1	NK1	ABHD15
CTNNB1	5.41384e-05	1.40719	0.667	0.158	1	NK1	CTNNB1
IFITM3	5.44538e-05	0.960629	0.667	0.137	1	NK1	IFITM3
ISYNA1	5.45275e-05	0.767219	0.333	0.038	1	NK1	ISYNA1
PRADC1	5.6143e-05	0.779918	0.222	0.017	1	NK1	PRADC1
TNKS	5.88827e-05	0.739678	0.444	0.065	1	NK1	TNKS
FGR	5.98145e-05	1.12715	0.222	0.017	1	NK1	FGR
GSTP1	6.33592e-05	1.32811	1	0.485	1	NK1	GSTP1
ZNF668	6.37125e-05	0.697942	0.222	0.017	1	NK1	ZNF668
POLR3H	6.37125e-05	0.602657	0.222	0.017	1	NK1	POLR3H
MMP25-AS1	6.67039e-05	1.21843	0.333	0.041	1	NK1	MMP25-AS1
PXN-AS1	6.78502e-05	0.613408	0.222	0.017	1	NK1	PXN-AS1
GORAB	6.78502e-05	0.494578	0.222	0.017	1	NK1	GORAB
ZDHHC8	6.78502e-05	0.472981	0.222	0.017	1	NK1	ZDHHC8
SLC25A42	6.78502e-05	0.471253	0.222	0.017	1	NK1	SLC25A42
SIPA1L1	6.98447e-05	0.841839	0.556	0.1	1	NK1	SIPA1L1
SPAG4	7.22413e-05	0.671408	0.222	0.017	1	NK1	SPAG4
DPYSL2	7.22413e-05	0.495003	0.222	0.017	1	NK1	DPYSL2
PUDP	7.69002e-05	0.562843	0.222	0.017	1	NK1	PUDP
CLNK	7.69002e-05	0.488694	0.222	0.017	1	NK1	CLNK
FOSL2	8.51942e-05	1.45535	0.778	0.23	1	NK1	FOSL2
CHKA	8.70834e-05	0.463979	0.222	0.017	1	NK1	CHKA
FCGR3A	9.02433e-05	1.35368	0.333	0.041	1	NK1	FCGR3A
ACOT7	9.34056e-05	0.83051	0.444	0.072	1	NK1	ACOT7
CCNJL	9.5033e-05	0.732104	0.111	0.003	1	NK1	CCNJL
KIR3DX1	9.5033e-05	0.55286	0.111	0.003	1	NK1	KIR3DX1
RP11-977G19.11	9.5033e-05	0.547152	0.111	0.003	1	NK1	RP11-977G19.11
RP11-134P9.3	9.5033e-05	0.54388	0.111	0.003	1	NK1	RP11-134P9.3
RP11-473M20.7	9.5033e-05	0.541696	0.111	0.003	1	NK1	RP11-473M20.7
CTC-459F4.3	9.5033e-05	0.541367	0.111	0.003	1	NK1	CTC-459F4.3
LRRC37B	9.5033e-05	0.540819	0.111	0.003	1	NK1	LRRC37B
PGBD4	9.5033e-05	0.537573	0.111	0.003	1	NK1	PGBD4
RP11-390E23.6	9.5033e-05	0.534937	0.111	0.003	1	NK1	RP11-390E23.6
CASC5	9.5033e-05	0.53435	0.111	0.003	1	NK1	CASC5
SLC9B2	9.5033e-05	0.522183	0.111	0.003	1	NK1	SLC9B2
PTOV1-AS2	9.5033e-05	0.45209	0.111	0.003	1	NK1	PTOV1-AS2
AP4B1-AS1	9.5033e-05	0.450084	0.111	0.003	1	NK1	AP4B1-AS1
MELK	9.5033e-05	0.450084	0.111	0.003	1	NK1	MELK
TIE1	9.5033e-05	0.449109	0.111	0.003	1	NK1	TIE1
URB1	9.5033e-05	0.448796	0.111	0.003	1	NK1	URB1
MAGI1	9.5033e-05	0.448642	0.111	0.003	1	NK1	MAGI1
RNU6-6P	9.5033e-05	0.448642	0.111	0.003	1	NK1	RNU6-6P
LINC01146	9.5033e-05	0.448505	0.111	0.003	1	NK1	LINC01146
AL357793.1	9.5033e-05	0.447894	0.111	0.003	1	NK1	AL357793.1
TMEM51	9.5033e-05	0.447088	0.111	0.003	1	NK1	TMEM51
PLTP	9.5033e-05	0.44705	0.111	0.003	1	NK1	PLTP
CCNF	9.5033e-05	0.446965	0.111	0.003	1	NK1	CCNF
ZEB2-AS1	9.5033e-05	0.44671	0.111	0.003	1	NK1	ZEB2-AS1
P2RY1	9.5033e-05	0.446183	0.111	0.003	1	NK1	P2RY1
ACVR1B	9.5033e-05	0.445553	0.111	0.003	1	NK1	ACVR1B
Z95115.1	9.5033e-05	0.444992	0.111	0.003	1	NK1	Z95115.1
ARMC9	9.5033e-05	0.444162	0.111	0.003	1	NK1	ARMC9
CDAN1	9.5033e-05	0.443766	0.111	0.003	1	NK1	CDAN1
TLR6	9.5033e-05	0.442727	0.111	0.003	1	NK1	TLR6
TMEM38A	9.5033e-05	0.409731	0.111	0.003	1	NK1	TMEM38A
CTPS2	9.5033e-05	0.407904	0.111	0.003	1	NK1	CTPS2
CYGB	9.5033e-05	0.406886	0.111	0.003	1	NK1	CYGB
CCDC92	0.000102126	0.721673	0.444	0.069	1	NK1	CCDC92
CEP112	0.000106513	0.531457	0.111	0.003	1	NK1	CEP112
ZNF837	0.000106513	0.530129	0.111	0.003	1	NK1	ZNF837
EP400NL	0.000106513	0.527237	0.111	0.003	1	NK1	EP400NL
DGUOK-AS1	0.000106513	0.522843	0.111	0.003	1	NK1	DGUOK-AS1
C4orf29	0.000106513	0.520659	0.111	0.003	1	NK1	C4orf29
PPM1L	0.000106513	0.51304	0.111	0.003	1	NK1	PPM1L
CDKL4	0.000106513	0.442683	0.111	0.003	1	NK1	CDKL4
AC004817.3	0.000106513	0.436621	0.111	0.003	1	NK1	AC004817.3
TMEM169	0.000106513	0.43488	0.111	0.003	1	NK1	TMEM169
SERPINB8	0.000106513	0.434488	0.111	0.003	1	NK1	SERPINB8
B3GNT8	0.000106513	0.426406	0.111	0.003	1	NK1	B3GNT8
NUP133	0.000111648	0.738665	0.333	0.041	1	NK1	NUP133
INO80	0.00013477	0.859285	0.333	0.045	1	NK1	INO80
GBA	0.00014035	0.828823	0.333	0.045	1	NK1	GBA
ZNF767P	0.000143655	0.555232	0.333	0.041	1	NK1	ZNF767P
ZMPSTE24	0.000146144	0.866689	0.333	0.045	1	NK1	ZMPSTE24
SLC1A5	0.00015556	1.25371	0.444	0.086	1	NK1	SLC1A5
ARHGEF7	0.000155954	0.820191	0.556	0.107	1	NK1	ARHGEF7
AC243829.4	0.000158068	1.46098	0.333	0.048	1	NK1	AC243829.4
CD247	0.000159769	1.54305	0.889	0.436	1	NK1	CD247
ENG	0.000164909	0.859415	0.333	0.045	1	NK1	ENG
CTSZ	0.000176108	0.888877	0.556	0.12	1	NK1	CTSZ
WDR83OS	0.000176365	0.965424	0.556	0.124	1	NK1	WDR83OS
PDHA1	0.000178717	0.871132	0.556	0.113	1	NK1	PDHA1
SLC16A3	0.000186701	1.41166	0.444	0.086	1	NK1	SLC16A3
DLGAP1-AS1	0.000193471	0.755896	0.333	0.045	1	NK1	DLGAP1-AS1
RP2	0.000193471	0.705177	0.333	0.045	1	NK1	RP2
DBN1	0.000193471	0.648285	0.333	0.045	1	NK1	DBN1
SMG9	0.000194783	0.748366	0.222	0.021	1	NK1	SMG9
TNPO2	0.000205865	0.467772	0.222	0.021	1	NK1	TNPO2
RPL41P2	0.000212626	1.04408	0.667	0.162	1	NK1	RPL41P2
PTTG1IP	0.000217399	0.651865	0.444	0.076	1	NK1	PTTG1IP
ZNF789	0.000217537	0.690797	0.222	0.021	1	NK1	ZNF789
C2orf76	0.000223599	0.567008	0.222	0.021	1	NK1	C2orf76
HKR1	0.000229829	0.682353	0.222	0.021	1	NK1	HKR1
FANCG	0.000229829	0.644792	0.222	0.021	1	NK1	FANCG
2024-09-08	0.000229829	0.598288	0.222	0.021	1	NK1	2024-09-08
GSTM2	0.000232624	1.07749	0.333	0.048	1	NK1	GSTM2
PPP3CA	0.000242206	0.829938	0.444	0.079	1	NK1	PPP3CA
RNF40	0.00024277	0.636018	0.222	0.021	1	NK1	RNF40
KIF18A	0.00024277	0.599624	0.222	0.021	1	NK1	KIF18A
DONSON	0.00024277	0.596795	0.222	0.021	1	NK1	DONSON
CRAMP1	0.00024277	0.579714	0.222	0.021	1	NK1	CRAMP1
RCN1	0.00024277	0.569668	0.222	0.021	1	NK1	RCN1
F8A3	0.00024277	0.562836	0.222	0.021	1	NK1	F8A3
TRIB3	0.00024277	0.491444	0.222	0.021	1	NK1	TRIB3
PVRIG	0.000245151	0.622236	0.333	0.045	1	NK1	PVRIG
SDHAP3	0.000256393	0.595324	0.222	0.021	1	NK1	SDHAP3
P2RY11	0.000256393	0.544481	0.222	0.021	1	NK1	P2RY11
PPFIA1	0.000265079	0.664385	0.333	0.045	1	NK1	PPFIA1
ACAD8	0.000270729	0.669755	0.222	0.021	1	NK1	ACAD8
SERPINE2	0.000285815	0.438663	0.222	0.021	1	NK1	SERPINE2
AP4B1	0.000292058	0.819878	0.333	0.048	1	NK1	AP4B1
PLCG2	0.000303251	1.09908	0.333	0.048	1	NK1	PLCG2
NUGGC	0.000318378	0.457945	0.222	0.021	1	NK1	NUGGC
SCPEP1	0.000339287	0.684232	0.333	0.048	1	NK1	SCPEP1
TENT2	0.000359455	0.703805	0.444	0.079	1	NK1	TENT2
LYRM7	0.000379299	0.598177	0.333	0.048	1	NK1	LYRM7
OTUD5	0.000392534	1.20828	0.444	0.093	1	NK1	OTUD5
SMG6	0.000421609	0.807434	0.333	0.052	1	NK1	SMG6
KIAA0513	0.000442787	0.711203	0.444	0.079	1	NK1	KIAA0513
RPL26	0.000452302	-0.938962	1	0.983	1	NK1	RPL26
ZBTB44	0.000452821	0.790961	0.333	0.052	1	NK1	ZBTB44
ABTB2	0.000467491	0.871844	0.222	0.024	1	NK1	ABTB2
DHX15	0.000468051	0.973871	0.556	0.137	1	NK1	DHX15
PAK1IP1	0.000469223	0.752037	0.333	0.052	1	NK1	PAK1IP1
CHD9	0.000478836	0.948131	0.556	0.127	1	NK1	CHD9
NAA40	0.00049118	0.714519	0.222	0.024	1	NK1	NAA40
ARAP1	0.000521815	0.738623	0.333	0.052	1	NK1	ARAP1
CD7	0.000525747	1.85813	0.889	0.77	1	NK1	CD7
SEC11A	0.000541773	0.972919	0.889	0.309	1	NK1	SEC11A
GPR89A	0.000559875	0.905846	0.333	0.052	1	NK1	GPR89A
RAB3GAP1	0.000562581	0.958908	0.444	0.093	1	NK1	RAB3GAP1
IRF8	0.000569134	0.994502	0.222	0.024	1	NK1	IRF8
MFN2	0.000569134	0.539337	0.222	0.024	1	NK1	MFN2
ZNF121	0.00057986	0.685502	0.333	0.052	1	NK1	ZNF121
SLC35E2A	0.000597581	0.670403	0.222	0.024	1	NK1	SLC35E2A
SFXN5	0.000597581	0.594684	0.222	0.024	1	NK1	SFXN5
SPRY2	0.000627346	0.72163	0.222	0.024	1	NK1	SPRY2
ARFGAP1	0.000627346	0.662792	0.222	0.024	1	NK1	ARFGAP1
EPS15L1	0.000627398	0.78109	0.333	0.055	1	NK1	EPS15L1
CD3G	0.000627987	-2.37985	0	0.653	1	NK1	CD3G
RNF122	0.000658487	0.650141	0.222	0.024	1	NK1	RNF122
SLC25A16	0.000658487	0.609089	0.222	0.024	1	NK1	SLC25A16
GCFC2	0.000658487	0.519593	0.222	0.024	1	NK1	GCFC2
KLRD1	0.000697352	1.25762	0.778	0.265	1	NK1	KLRD1
SIRT3	0.000725124	0.441477	0.222	0.024	1	NK1	SIRT3
DOP1A	0.000725124	0.432191	0.222	0.024	1	NK1	DOP1A
RPAP2	0.000728275	0.68952	0.444	0.086	1	NK1	RPAP2
PLRG1	0.000754794	0.794688	0.444	0.089	1	NK1	PLRG1
ZNF322	0.000760744	0.538739	0.222	0.024	1	NK1	ZNF322
ZNF254	0.000760744	0.485235	0.222	0.024	1	NK1	ZNF254
FAM160B2	0.000768121	0.768394	0.333	0.055	1	NK1	FAM160B2
ZBTB17	0.000836907	0.509613	0.222	0.024	1	NK1	ZBTB17
KLRC2	0.000864086	1.01837	0.444	0.096	1	NK1	KLRC2
RBKS	0.000869832	1.11731	0.333	0.058	1	NK1	RBKS
KLHL6	0.000869838	0.998446	0.333	0.058	1	NK1	KLHL6
TGFB1	0.00087455	1.3029	0.889	0.471	1	NK1	TGFB1
WDR6	0.000877654	0.657704	0.333	0.055	1	NK1	WDR6
MEF2A	0.000907214	0.728927	0.333	0.055	1	NK1	MEF2A
AGK	0.000927932	1.02566	0.333	0.058	1	NK1	AGK
AP2A2	0.000939117	0.518814	0.333	0.052	1	NK1	AP2A2
CDC16	0.00106935	0.708068	0.333	0.055	1	NK1	CDC16
CD81	0.00111716	1.36941	0.889	0.536	1	NK1	CD81
RPS10-NUDT3	0.00113085	0.699934	0.222	0.027	1	NK1	RPS10-NUDT3
ATP1B3	0.00115643	1.59778	0.667	0.258	1	NK1	ATP1B3
IARS	0.00117854	0.745794	0.444	0.096	1	NK1	IARS
RGL2	0.00118185	0.752088	0.222	0.027	1	NK1	RGL2
EFCAB14	0.00120448	0.800293	0.556	0.144	1	NK1	EFCAB14
SERPINH1	0.00122782	1.78011	0.444	0.1	1	NK1	SERPINH1
UAP1	0.00127619	0.798014	0.333	0.058	1	NK1	UAP1
EIF4H	0.00128912	0.767775	0.667	0.189	1	NK1	EIF4H
ICE1	0.00131492	0.615289	0.444	0.093	1	NK1	ICE1
RNF130	0.00131697	0.707859	0.333	0.058	1	NK1	RNF130
SQLE	0.00134788	0.639299	0.222	0.027	1	NK1	SQLE
SNRK-AS1	0.00134788	0.624327	0.222	0.027	1	NK1	SNRK-AS1
TFRC	0.00137268	0.69909	0.444	0.096	1	NK1	TFRC
GEM	0.00140273	2.02775	0.333	0.065	1	NK1	GEM
CBR4	0.00140784	0.65208	0.222	0.027	1	NK1	CBR4
DHX57	0.00140784	0.565173	0.222	0.027	1	NK1	DHX57
DUSP28	0.00140784	0.531949	0.222	0.027	1	NK1	DUSP28
YIPF4	0.00143023	0.796272	0.556	0.144	1	NK1	YIPF4
GIPC1	0.00144369	0.992558	0.444	0.096	1	NK1	GIPC1
TMEM205	0.00144526	1.11105	0.333	0.065	1	NK1	TMEM205
LMO4	0.00146233	0.78516	0.444	0.1	1	NK1	LMO4
HDAC1	0.00148201	0.890715	0.667	0.196	1	NK1	HDAC1
FAM3C	0.00150947	0.75971	0.556	0.148	1	NK1	FAM3C
DMTN	0.0015352	0.461268	0.222	0.027	1	NK1	DMTN
ZNF773	0.0015352	0.42114	0.222	0.027	1	NK1	ZNF773
ERGIC1	0.00153946	0.658815	0.333	0.058	1	NK1	ERGIC1
VEZF1	0.00158947	0.851435	0.333	0.062	1	NK1	VEZF1
ZNF880	0.00160278	0.544629	0.222	0.027	1	NK1	ZNF880
ZNF701	0.00160278	0.485125	0.222	0.027	1	NK1	ZNF701
EP400	0.00163824	0.732516	0.333	0.062	1	NK1	EP400
SYNGR3	0.00167309	0.490032	0.222	0.027	1	NK1	SYNGR3
ZNF841	0.00167309	0.436105	0.222	0.027	1	NK1	ZNF841
IVNS1ABP	0.00170794	1.1111	0.778	0.265	1	NK1	IVNS1ABP
IRF4	0.00171166	0.7607	0.556	0.148	1	NK1	IRF4
ACO2	0.00171559	0.808813	0.444	0.107	1	NK1	ACO2
BAZ2B	0.00173993	0.82264	0.333	0.062	1	NK1	BAZ2B
ZNF429	0.00174623	0.516324	0.222	0.027	1	NK1	ZNF429
FAM110A	0.0017629	0.558941	0.444	0.096	1	NK1	FAM110A
ZCCHC2	0.00177788	1.01667	0.333	0.065	1	NK1	ZCCHC2
SEC22B	0.00179293	0.770659	0.333	0.062	1	NK1	SEC22B
ATP7A	0.00179612	0.517033	0.333	0.058	1	NK1	ATP7A
ACTR5	0.0018223	0.496794	0.222	0.027	1	NK1	ACTR5
ATN1	0.0018223	0.416668	0.222	0.027	1	NK1	ATN1
FMR1	0.0018474	0.659512	0.333	0.062	1	NK1	FMR1
AOAH	0.00186645	1.2994	0.556	0.172	1	NK1	AOAH
KIAA1671	0.00190141	0.421278	0.222	0.027	1	NK1	KIAA1671
GDF15	0.00192537	0.704971	0.111	0.007	1	NK1	GDF15
CLUH	0.00192537	0.554708	0.111	0.007	1	NK1	CLUH
HDAC9	0.00192537	0.52675	0.111	0.007	1	NK1	HDAC9
ANGPT2	0.00192537	0.521489	0.111	0.007	1	NK1	ANGPT2
PRR4	0.00192537	0.521431	0.111	0.007	1	NK1	PRR4
ZNF234	0.00192537	0.505001	0.111	0.007	1	NK1	ZNF234
AL390719.1	0.00192537	0.436605	0.111	0.007	1	NK1	AL390719.1
MACROD1	0.00192537	0.435706	0.111	0.007	1	NK1	MACROD1
AC011450.1	0.00192537	0.434914	0.111	0.007	1	NK1	AC011450.1
RAD51AP1	0.00192537	0.434248	0.111	0.007	1	NK1	RAD51AP1
PRF1	0.00193204	1.48339	0.778	0.375	1	NK1	PRF1
COIL	0.00196093	0.684993	0.333	0.062	1	NK1	COIL
EHBP1L1	0.00197304	0.923832	0.444	0.103	1	NK1	EHBP1L1
TNKS2	0.00201687	0.688225	0.667	0.192	1	NK1	TNKS2
RASD1	0.00207787	0.817389	0.111	0.007	1	NK1	RASD1
AC008735.2	0.00207787	0.515759	0.111	0.007	1	NK1	AC008735.2
CCSER1	0.00207787	0.513819	0.111	0.007	1	NK1	CCSER1
SMCR5	0.00207787	0.51317	0.111	0.007	1	NK1	SMCR5
AC115618.1	0.00207787	0.425718	0.111	0.007	1	NK1	AC115618.1
ZNF571-AS1	0.00207787	0.424447	0.111	0.007	1	NK1	ZNF571-AS1
ZNF321P	0.00207787	0.405561	0.111	0.007	1	NK1	ZNF321P
MAP3K8	0.00210589	0.922555	0.667	0.216	1	NK1	MAP3K8
UBE3C	0.00210988	0.580792	0.444	0.1	1	NK1	UBE3C
PRR14	0.00217013	0.674978	0.444	0.103	1	NK1	PRR14
CCL3	0.0022121	1.49438	0.444	0.113	1	NK1	CCL3
CCDC112	0.00224138	0.422784	0.111	0.007	1	NK1	CCDC112
CXCL3	0.00224138	0.418318	0.111	0.007	1	NK1	CXCL3
PLXNA3	0.00224138	0.417946	0.111	0.007	1	NK1	PLXNA3
AC019163.1	0.00224138	0.417829	0.111	0.007	1	NK1	AC019163.1
AQP11	0.00224138	0.413696	0.111	0.007	1	NK1	AQP11
L3MBTL4	0.00224138	0.406453	0.111	0.007	1	NK1	L3MBTL4
AK3	0.00224336	0.732842	0.333	0.065	1	NK1	AK3
MGRN1	0.00227335	0.52185	0.333	0.062	1	NK1	MGRN1
ATG4B	0.00227529	0.836257	0.444	0.103	1	NK1	ATG4B
WASF2	0.00229867	1.00607	0.667	0.241	1	NK1	WASF2
KIF21A	0.00241062	0.571741	0.333	0.062	1	NK1	KIF21A
EPS8L2	0.00241062	0.539431	0.333	0.062	1	NK1	EPS8L2
MCUR1	0.00243255	0.815402	0.222	0.031	1	NK1	MCUR1
CCRL2	0.00243255	0.691981	0.222	0.031	1	NK1	CCRL2
CUL1	0.00243475	0.907512	0.444	0.11	1	NK1	CUL1
TBCD	0.00243475	0.778623	0.444	0.11	1	NK1	TBCD
SLC4A1AP	0.00248206	0.640815	0.333	0.062	1	NK1	SLC4A1AP
NDFIP2	0.00249975	0.703804	0.444	0.103	1	NK1	NDFIP2
ULBP2	0.00253088	0.715641	0.222	0.031	1	NK1	ULBP2
PISD	0.00253088	0.652542	0.222	0.031	1	NK1	PISD
BHLHE40	0.00256158	1.13659	0.667	0.223	1	NK1	BHLHE40
NAA16	0.00258847	0.728431	0.333	0.065	1	NK1	NAA16
QDPR	0.00258847	0.619229	0.333	0.065	1	NK1	QDPR
CD63	0.00259394	1.08487	0.778	0.351	1	NK1	CD63
MRPL14	0.00265727	0.783803	0.556	0.162	1	NK1	MRPL14
ITPK1	0.00273961	0.543027	0.333	0.065	1	NK1	ITPK1
FMNL3	0.00275433	0.809571	0.333	0.069	1	NK1	FMNL3
AC020915.3	0.00284808	0.526958	0.222	0.031	1	NK1	AC020915.3
ACSL5	0.0028549	0.705222	0.444	0.11	1	NK1	ACSL5
UPF1	0.00291094	0.76651	0.333	0.069	1	NK1	UPF1
HSPA9	0.00293264	0.889261	0.667	0.23	1	NK1	HSPA9
ZMYM6	0.00296162	0.602449	0.222	0.031	1	NK1	ZMYM6
ACSL4	0.00299226	0.752381	0.333	0.069	1	NK1	ACSL4
CSTF2	0.00307927	0.504104	0.222	0.031	1	NK1	CSTF2
RASGEF1B	0.00309933	0.849994	0.444	0.113	1	NK1	RASGEF1B
USP37	0.00320118	0.497312	0.222	0.031	1	NK1	USP37
DDAH2	0.00321774	0.542405	0.333	0.062	1	NK1	DDAH2
IFITM2	0.00322856	1.00768	1	0.777	1	NK1	IFITM2
GMEB2	0.00332746	0.432863	0.222	0.031	1	NK1	GMEB2
EID2B	0.00332746	0.421076	0.222	0.031	1	NK1	EID2B
DTYMK	0.00332746	0.410018	0.222	0.031	1	NK1	DTYMK
MT-CO2	0.00338874	0.589478	1	1	1	NK1	MT-CO2
XPR1	0.00345827	0.532312	0.222	0.031	1	NK1	XPR1
IQGAP1	0.00349566	0.800706	1	0.502	1	NK1	IQGAP1
CSNK1D	0.00355228	1.12761	0.556	0.189	1	NK1	CSNK1D
ARID3B	0.00359375	0.427596	0.222	0.031	1	NK1	ARID3B
SLC2A1	0.00359375	0.427165	0.222	0.031	1	NK1	SLC2A1
TOX4	0.00361074	0.938887	0.556	0.175	1	NK1	TOX4
RPS6KA1	0.0036155	0.731697	0.444	0.113	1	NK1	RPS6KA1
TP53I13	0.00366902	0.90732	0.556	0.165	1	NK1	TP53I13
PBX3	0.00371143	1.13063	0.222	0.034	1	NK1	PBX3
TRIM39	0.00371143	0.930988	0.222	0.034	1	NK1	TRIM39
CCDC127	0.00371143	0.723249	0.222	0.034	1	NK1	CCDC127
BIN2	0.00413493	0.663383	0.778	0.251	1	NK1	BIN2
SMIM4	0.00414326	0.706688	0.333	0.069	1	NK1	SMIM4
NOL11	0.00414326	0.607216	0.333	0.069	1	NK1	NOL11
NFKB1	0.0041941	0.689718	0.667	0.216	1	NK1	NFKB1
SDF4	0.00419506	0.669417	0.667	0.21	1	NK1	SDF4
DUSP10	0.00420871	0.96649	0.444	0.113	1	NK1	DUSP10
FLOT2	0.00425427	0.720987	0.444	0.113	1	NK1	FLOT2
CLPX	0.00425533	0.63418	0.333	0.069	1	NK1	CLPX
BCL2L11	0.00433484	0.782895	0.444	0.117	1	NK1	BCL2L11
OGT	0.00433895	0.669485	0.667	0.21	1	NK1	OGT
INTS11	0.00435001	0.679254	0.444	0.11	1	NK1	INTS11
SFMBT2	0.00448948	0.602773	0.444	0.107	1	NK1	SFMBT2
BET1L	0.00456306	0.603401	0.333	0.072	1	NK1	BET1L
CD300A	0.00461496	0.974372	0.222	0.034	1	NK1	CD300A
SCAMP1-AS1	0.00461496	0.832954	0.222	0.034	1	NK1	SCAMP1-AS1
RELB	0.00465562	0.89015	0.556	0.175	1	NK1	RELB
SLAMF7	0.00473165	0.618244	0.333	0.069	1	NK1	SLAMF7
LPCAT3	0.00473165	0.589543	0.333	0.069	1	NK1	LPCAT3
PYCR2	0.00474364	0.638724	0.444	0.11	1	NK1	PYCR2
GPR35	0.00478358	0.652526	0.222	0.034	1	NK1	GPR35
HLCS	0.00478358	0.547214	0.222	0.034	1	NK1	HLCS
PITPNC1	0.00479041	0.9843	0.667	0.244	1	NK1	PITPNC1
IL7R	0.0047944	-2.89483	0.111	0.619	1	NK1	IL7R
IGLV3-1	0.00483545	0.422041	0.444	0.103	1	NK1	IGLV3-1
WDR18	0.00485803	0.576632	0.333	0.069	1	NK1	WDR18
MIDN	0.00490614	0.627681	0.556	0.155	1	NK1	MIDN
RPS12	0.00490764	-0.765479	1	0.993	1	NK1	RPS12
SLK	0.00494216	0.765441	0.444	0.12	1	NK1	SLK
CENPC	0.00494932	0.966198	0.556	0.203	1	NK1	CENPC
ZNHIT6	0.00495776	0.623628	0.222	0.034	1	NK1	ZNHIT6
MTRF1L	0.00495776	0.613498	0.222	0.034	1	NK1	MTRF1L
FADS3	0.00495776	0.546763	0.222	0.034	1	NK1	FADS3
TRIM65	0.00495776	0.533273	0.222	0.034	1	NK1	TRIM65
TOB2	0.00500986	1.12892	0.333	0.079	1	NK1	TOB2
C20orf27	0.00519166	0.614517	0.333	0.072	1	NK1	C20orf27
ACTN4	0.0052317	0.859462	0.889	0.395	1	NK1	ACTN4
GLT8D1	0.00525572	0.604679	0.333	0.069	1	NK1	GLT8D1
SSRP1	0.00526062	0.838045	0.444	0.131	1	NK1	SSRP1
ECHDC2	0.00533751	0.595619	0.444	0.11	1	NK1	ECHDC2
TMIGD2	0.00537599	1.09473	0.444	0.127	1	NK1	TMIGD2
GMPS	0.00537666	0.745045	0.444	0.124	1	NK1	GMPS
HMCES	0.00546473	0.791626	0.556	0.175	1	NK1	HMCES
NSF	0.00551525	0.513329	0.222	0.034	1	NK1	NSF
KIAA1328	0.00551525	0.512284	0.222	0.034	1	NK1	KIAA1328
CENPB	0.00551525	0.499776	0.222	0.034	1	NK1	CENPB
CLIP4	0.00553695	0.526461	0.333	0.069	1	NK1	CLIP4
CDKN2C	0.00554943	0.756572	0.444	0.113	1	NK1	CDKN2C
RANGAP1	0.00560538	0.630741	0.333	0.072	1	NK1	RANGAP1
TBC1D20	0.00560538	0.616566	0.333	0.072	1	NK1	TBC1D20
COX20	0.00560702	0.874749	0.667	0.254	1	NK1	COX20
STARD3	0.00560794	0.640363	0.444	0.113	1	NK1	STARD3
PACS1	0.00569346	0.623838	0.444	0.117	1	NK1	PACS1
SUPT4H1	0.00569913	1.08719	0.556	0.189	1	NK1	SUPT4H1
KLF16	0.00571329	0.536903	0.222	0.034	1	NK1	KLF16
ATP6V1D	0.00578689	0.600343	0.444	0.113	1	NK1	ATP6V1D
PLCL2	0.00581047	0.935884	0.444	0.131	1	NK1	PLCL2
MAFF	0.00583168	0.470545	0.333	0.069	1	NK1	MAFF
HIP1R	0.00591772	0.42249	0.222	0.034	1	NK1	HIP1R
MPHOSPH9	0.00593668	0.681022	0.333	0.076	1	NK1	MPHOSPH9
MTFP1	0.00594696	0.732332	0.444	0.12	1	NK1	MTFP1
ILF3-DT	0.00598429	0.412772	0.333	0.069	1	NK1	ILF3-DT
PIK3AP1	0.00604861	0.613145	0.333	0.072	1	NK1	PIK3AP1
CTSD	0.00607775	0.600503	0.556	0.168	1	NK1	CTSD
DCTN1	0.00608587	0.666602	0.333	0.076	1	NK1	DCTN1
CCL5	0.00614067	1.21026	0.889	0.564	1	NK1	CCL5
TMEM18	0.00620323	0.507601	0.333	0.072	1	NK1	TMEM18
ENO1	0.0062166	0.736275	0.889	0.526	1	NK1	ENO1
ZNF652	0.00623843	0.641338	0.333	0.076	1	NK1	ZNF652
XCL2	0.00634616	0.685902	0.556	0.196	1	NK1	XCL2
MRTO4	0.00634646	0.410906	0.222	0.034	1	NK1	MRTO4
MAPK9	0.00639442	0.823291	0.333	0.076	1	NK1	MAPK9
HECTD4	0.00639442	0.707057	0.333	0.076	1	NK1	HECTD4
IRF1	0.00641227	0.809135	0.889	0.402	1	NK1	IRF1
PTOV1	0.00643529	0.577199	0.556	0.158	1	NK1	PTOV1
TRAFD1	0.00655392	0.577255	0.333	0.076	1	NK1	TRAFD1
SMG1P5	0.00657115	0.448644	0.222	0.034	1	NK1	SMG1P5
SQSTM1	0.00657872	1.28786	0.778	0.457	1	NK1	SQSTM1
CHD4	0.00668866	0.475907	0.333	0.072	1	NK1	CHD4
PRDM2	0.00674054	0.731739	0.556	0.175	1	NK1	PRDM2
MYADM	0.00674232	1.48494	0.778	0.409	1	NK1	MYADM
IARS2	0.00703098	0.491598	0.333	0.072	1	NK1	IARS2
DNAJB11	0.00718522	0.653544	0.556	0.165	1	NK1	DNAJB11
CCNT2	0.0071896	0.729821	0.333	0.082	1	NK1	CCNT2
RAB2B	0.00719867	0.601071	0.222	0.038	1	NK1	RAB2B
SETD1B	0.00719867	0.555007	0.222	0.038	1	NK1	SETD1B
RPL36	0.00735349	-0.831678	1	0.976	1	NK1	RPL36
XKR6	0.00744063	0.61022	0.222	0.038	1	NK1	XKR6
DDX3Y	0.00757216	0.633988	0.444	0.12	1	NK1	DDX3Y
NUP62	0.00757399	0.488862	0.333	0.072	1	NK1	NUP62
ARL4A	0.00761906	1.3476	0.444	0.151	1	NK1	ARL4A
MRPS10	0.00770604	0.647994	0.444	0.124	1	NK1	MRPS10
HSPA5	0.00774533	0.888054	0.889	0.502	1	NK1	HSPA5
ZFAND5	0.00776615	1.72309	0.556	0.22	1	NK1	ZFAND5
GLRX3	0.00787877	0.600153	0.444	0.12	1	NK1	GLRX3
ERCC5	0.00788029	0.897399	0.444	0.134	1	NK1	ERCC5
TOMM7	0.0078857	-1.30852	0.556	0.732	1	NK1	TOMM7
RIN3	0.00794294	0.758732	0.333	0.079	1	NK1	RIN3
CDK16	0.00794656	0.549444	0.222	0.038	1	NK1	CDK16
AC012146.1	0.00794656	0.494518	0.222	0.038	1	NK1	AC012146.1
DAPK2	0.00795659	0.463356	0.333	0.072	1	NK1	DAPK2
ZNF683	0.00796427	0.604443	0.333	0.076	1	NK1	ZNF683
SERPINB1	0.00811583	0.76692	0.667	0.292	1	NK1	SERPINB1
GBP4	0.0081298	0.836523	0.556	0.196	1	NK1	GBP4
TMEM184C	0.00821089	0.49424	0.222	0.038	1	NK1	TMEM184C
SYTL3	0.00847845	1.02733	0.889	0.522	1	NK1	SYTL3
CPSF3	0.00848307	0.430299	0.222	0.038	1	NK1	CPSF3
NR1H2	0.00849983	0.544399	0.667	0.213	1	NK1	NR1H2
ECE1	0.00852595	0.554028	0.333	0.079	1	NK1	ECE1
RPS25	0.00864546	-0.756958	1	0.983	1	NK1	RPS25
CMC1	0.00867374	0.703574	0.556	0.192	1	NK1	CMC1
PREB	0.00872862	0.656359	0.333	0.079	1	NK1	PREB
SH2B3	0.00876329	0.522204	0.222	0.038	1	NK1	SH2B3
YTHDC2	0.00876667	0.549485	0.333	0.076	1	NK1	YTHDC2
PRRC2A	0.00879426	0.720449	0.556	0.186	1	NK1	PRRC2A
MAPK1	0.00894247	0.938708	0.556	0.203	1	NK1	MAPK1
RHEBL1	0.00900329	0.530189	0.111	0.01	1	NK1	RHEBL1
MMP24-AS1	0.00900329	0.510072	0.111	0.01	1	NK1	MMP24-AS1
NOCT	0.00900329	0.494826	0.111	0.01	1	NK1	NOCT
FRG1BP	0.00900329	0.428762	0.111	0.01	1	NK1	FRG1BP
KIAA0930	0.00900329	0.426629	0.111	0.01	1	NK1	KIAA0930
TPCN2	0.00900329	0.424917	0.111	0.01	1	NK1	TPCN2
IFT46	0.00900329	0.422245	0.111	0.01	1	NK1	IFT46
NDST2	0.00905175	0.464357	0.222	0.038	1	NK1	NDST2
MICAL1	0.00912938	0.674425	0.444	0.127	1	NK1	MICAL1
EHMT1	0.00912938	0.587089	0.444	0.127	1	NK1	EHMT1
TRIP12	0.00914645	0.793564	0.444	0.141	1	NK1	TRIP12
ZNF160	0.00914693	0.620687	0.333	0.079	1	NK1	ZNF160
LMBR1	0.00919435	0.470731	0.333	0.076	1	NK1	LMBR1
UBE4B	0.00934866	0.503412	0.222	0.038	1	NK1	UBE4B
AC017104.1	0.00953392	0.680014	0.111	0.01	1	NK1	AC017104.1
KLF7	0.00953392	0.507264	0.111	0.01	1	NK1	KLF7
KIAA0753	0.00953392	0.50452	0.111	0.01	1	NK1	KIAA0753
AMER1	0.00953392	0.502149	0.111	0.01	1	NK1	AMER1
RNF207	0.00953392	0.501833	0.111	0.01	1	NK1	RNF207
CTD-2020K17.1	0.00953392	0.499668	0.111	0.01	1	NK1	CTD-2020K17.1
GIN1	0.00953392	0.49278	0.111	0.01	1	NK1	GIN1
C14orf159	0.00953392	0.489905	0.111	0.01	1	NK1	C14orf159
RP11-277L2.4	0.00953392	0.476924	0.111	0.01	1	NK1	RP11-277L2.4
TUFT1	0.00953392	0.423373	0.111	0.01	1	NK1	TUFT1
AL162586.1	0.00953392	0.423198	0.111	0.01	1	NK1	AL162586.1
SMPD3	0.00953392	0.421527	0.111	0.01	1	NK1	SMPD3
E2F7	0.00953392	0.419471	0.111	0.01	1	NK1	E2F7
FOXO4	0.00953392	0.419046	0.111	0.01	1	NK1	FOXO4
FAM86DP	0.00953392	0.418949	0.111	0.01	1	NK1	FAM86DP
E2F5	0.00953392	0.414555	0.111	0.01	1	NK1	E2F5
ARFGAP2	0.00958304	0.617161	0.333	0.079	1	NK1	ARFGAP2
CD38	0.00958481	0.456181	0.444	0.12	1	NK1	CD38
BABAM2	0.00961486	0.531632	0.444	0.117	1	NK1	BABAM2
FLOT1	0.00964348	0.442706	0.556	0.165	1	NK1	FLOT1
DNAJC24	0.00965423	0.410395	0.222	0.038	1	NK1	DNAJC24
ATAD2	0.00971648	0.695486	0.333	0.082	1	NK1	ATAD2
GPR65	0.00974282	0.991122	0.556	0.213	1	NK1	GPR65
PPP1R12C	0.00993389	0.615128	0.222	0.041	1	NK1	PPP1R12C
S1PR5	1.51788e-22	1.80224	0.5	0.007	4.99246e-18	NK2	S1PR5
FGFBP2	2.17907e-19	1.93464	0.375	0.003	7.16719e-15	NK2	FGFBP2
COL6A2	1.93086e-15	1.02694	0.375	0.007	6.35078e-11	NK2	COL6A2
FCGR3A.1	3.03006e-14	1.89864	0.625	0.034	9.96616e-10	NK2	FCGR3A
TTC38	4.48601e-13	1.00682	0.375	0.01	1.47549e-08	NK2	TTC38
AL353708.3	4.65899e-12	0.869546	0.25	0.003	1.53239e-07	NK2	AL353708.3
TDRKH-AS1	4.65899e-12	0.851835	0.25	0.003	1.53239e-07	NK2	TDRKH-AS1
TTC16	6.5266e-12	0.898354	0.25	0.003	2.14666e-07	NK2	TTC16
KIR2DL3	6.5266e-12	0.597561	0.25	0.003	2.14666e-07	NK2	KIR2DL3
DNAJC27	2.7583e-11	1.05843	0.375	0.014	9.07232e-07	NK2	DNAJC27
FGR.1	3.07089e-11	1.28098	0.375	0.014	1.01005e-06	NK2	FGR
MYO6	8.09176e-10	1.02655	0.375	0.017	2.66146e-05	NK2	MYO6
CATSPER1	1.73522e-09	0.918867	0.125	0	5.70731e-05	NK2	CATSPER1
CLC	1.73522e-09	0.918867	0.125	0	5.70731e-05	NK2	CLC
AL356599.1	1.73522e-09	0.668432	0.125	0	5.70731e-05	NK2	AL356599.1
AL121985.1	1.73522e-09	0.556611	0.125	0	5.70731e-05	NK2	AL121985.1
AC104695.2	1.73522e-09	0.556611	0.125	0	5.70731e-05	NK2	AC104695.2
TMEM163	1.73522e-09	0.556611	0.125	0	5.70731e-05	NK2	TMEM163
AC000123.3	1.73522e-09	0.556611	0.125	0	5.70731e-05	NK2	AC000123.3
AC009652.2	1.73522e-09	0.556611	0.125	0	5.70731e-05	NK2	AC009652.2
NEK5	1.73522e-09	0.556611	0.125	0	5.70731e-05	NK2	NEK5
AC091045.1	1.73522e-09	0.556611	0.125	0	5.70731e-05	NK2	AC091045.1
AC009093.3	1.73522e-09	0.556611	0.125	0	5.70731e-05	NK2	AC009093.3
GPR153	1.73522e-09	0.536663	0.125	0	5.70731e-05	NK2	GPR153
PITX1	1.73522e-09	0.536663	0.125	0	5.70731e-05	NK2	PITX1
AL133406.2	1.73522e-09	0.536663	0.125	0	5.70731e-05	NK2	AL133406.2
MTFR2	1.73522e-09	0.536663	0.125	0	5.70731e-05	NK2	MTFR2
AC007161.3	1.73522e-09	0.536663	0.125	0	5.70731e-05	NK2	AC007161.3
SHB	1.73522e-09	0.536663	0.125	0	5.70731e-05	NK2	SHB
AL392086.1	1.73522e-09	0.536663	0.125	0	5.70731e-05	NK2	AL392086.1
AL355075.4	1.73522e-09	0.536663	0.125	0	5.70731e-05	NK2	AL355075.4
THSD4-AS1	1.73522e-09	0.536663	0.125	0	5.70731e-05	NK2	THSD4-AS1
AC093525.2	1.73522e-09	0.536663	0.125	0	5.70731e-05	NK2	AC093525.2
KCNE1	1.73522e-09	0.536663	0.125	0	5.70731e-05	NK2	KCNE1
PRRX1	1.73522e-09	0.531384	0.125	0	5.70731e-05	NK2	PRRX1
SYK	1.73522e-09	0.531384	0.125	0	5.70731e-05	NK2	SYK
AP001267.5	1.73522e-09	0.531384	0.125	0	5.70731e-05	NK2	AP001267.5
GLT1D1	1.73522e-09	0.531384	0.125	0	5.70731e-05	NK2	GLT1D1
AC118553.2	1.73522e-09	0.503209	0.125	0	5.70731e-05	NK2	AC118553.2
AC105760.2	1.73522e-09	0.503209	0.125	0	5.70731e-05	NK2	AC105760.2
CCDC80	1.73522e-09	0.503209	0.125	0	5.70731e-05	NK2	CCDC80
CFB	1.73522e-09	0.503209	0.125	0	5.70731e-05	NK2	CFB
ITGBL1	1.73522e-09	0.503209	0.125	0	5.70731e-05	NK2	ITGBL1
SERPINF1	1.73522e-09	0.503209	0.125	0	5.70731e-05	NK2	SERPINF1
PMP22	1.73522e-09	0.503209	0.125	0	5.70731e-05	NK2	PMP22
C21orf62-AS1	1.73522e-09	0.503209	0.125	0	5.70731e-05	NK2	C21orf62-AS1
C21orf58	1.73522e-09	0.503209	0.125	0	5.70731e-05	NK2	C21orf58
AC024267.6	1.73522e-09	0.503209	0.125	0	5.70731e-05	NK2	AC024267.6
WDR63	1.73522e-09	0.4849	0.125	0	5.70731e-05	NK2	WDR63
GPR141	1.73522e-09	0.4849	0.125	0	5.70731e-05	NK2	GPR141
PTGDS	1.73522e-09	0.4849	0.125	0	5.70731e-05	NK2	PTGDS
GATA6	1.73522e-09	0.4849	0.125	0	5.70731e-05	NK2	GATA6
AC091588.3	1.73522e-09	0.4849	0.125	0	5.70731e-05	NK2	AC091588.3
SERPINB3	1.73522e-09	0.4849	0.125	0	5.70731e-05	NK2	SERPINB3
LINC02608	1.73522e-09	0.416292	0.125	0	5.70731e-05	NK2	LINC02608
RN7SL336P	1.73522e-09	0.416292	0.125	0	5.70731e-05	NK2	RN7SL336P
RPL10P19	1.73522e-09	0.416292	0.125	0	5.70731e-05	NK2	RPL10P19
FABP5P7	1.73522e-09	0.416292	0.125	0	5.70731e-05	NK2	FABP5P7
HOXC4	1.73522e-09	0.416292	0.125	0	5.70731e-05	NK2	HOXC4
AVPR1A	1.73522e-09	0.416292	0.125	0	5.70731e-05	NK2	AVPR1A
CMKLR1	1.73522e-09	0.416292	0.125	0	5.70731e-05	NK2	CMKLR1
FAM222A	1.73522e-09	0.416292	0.125	0	5.70731e-05	NK2	FAM222A
TMEM231	1.73522e-09	0.416292	0.125	0	5.70731e-05	NK2	TMEM231
SNORD3B-1	1.73522e-09	0.416292	0.125	0	5.70731e-05	NK2	SNORD3B-1
ITGA2B	1.73522e-09	0.416292	0.125	0	5.70731e-05	NK2	ITGA2B
RPL21P123	1.73522e-09	0.416292	0.125	0	5.70731e-05	NK2	RPL21P123
GTF2H3	2.76012e-09	1.25757	0.5	0.038	9.07833e-05	NK2	GTF2H3
IFIT3	3.74363e-09	0.951157	0.25	0.007	0.000123132	NK2	IFIT3
CX3CR1	4.24515e-09	0.672847	0.25	0.007	0.000139627	NK2	CX3CR1
C1orf21	6.8505e-09	1.30803	0.375	0.021	0.00022532	NK2	C1orf21
GNLY.1	9.36037e-09	2.3705	1	0.185	0.000307872	NK2	GNLY
TRAK2	1.25041e-08	1.33406	0.625	0.068	0.000411271	NK2	TRAK2
AC068775.1	3.34731e-08	0.993245	0.5	0.041	0.00110096	NK2	AC068775.1
TYROBP.1	4.25364e-08	2.13583	0.625	0.075	0.00139907	NK2	TYROBP
TMEM191A	1.41737e-07	1.15337	0.25	0.01	0.00466186	NK2	TMEM191A
ZNF252P	1.73476e-07	0.891236	0.25	0.01	0.00570579	NK2	ZNF252P
SV2C	2.12037e-07	0.885901	0.25	0.01	0.0069741	NK2	SV2C
PRSS23	2.12037e-07	0.676502	0.25	0.01	0.0069741	NK2	PRSS23
ADGRG1	2.31944e-07	1.34833	0.5	0.051	0.00762888	NK2	ADGRG1
CEP78	2.33784e-07	0.965896	0.375	0.027	0.00768938	NK2	CEP78
AC004865.2	2.34303e-07	0.632483	0.25	0.01	0.00770647	NK2	AC004865.2
ZNF827	8.83711e-07	0.942243	0.375	0.031	0.0290661	NK2	ZNF827
TOGARAM2	1.00033e-06	1.05046	0.375	0.031	0.0329018	NK2	TOGARAM2
RAP2A	1.73507e-06	0.784175	0.375	0.031	0.0570683	NK2	RAP2A
GTPBP2	1.92272e-06	0.843216	0.25	0.014	0.0632403	NK2	GTPBP2
TP53I11	2.09181e-06	0.993147	0.25	0.014	0.0688017	NK2	TP53I11
GZMH	2.24486e-06	2.09132	1	0.284	0.0738356	NK2	GZMH
ZNF28	2.47382e-06	0.821927	0.25	0.014	0.0813665	NK2	ZNF28
FOXP4	2.47382e-06	0.682695	0.25	0.014	0.0813665	NK2	FOXP4
NKG7	2.88068e-06	2.14097	1	0.486	0.0947486	NK2	NKG7
RPL10P9	2.92233e-06	0.811435	0.25	0.014	0.0961184	NK2	RPL10P9
ADAM28	2.92233e-06	0.746041	0.25	0.014	0.0961184	NK2	ADAM28
RXRA	3.17488e-06	0.576139	0.25	0.014	0.104425	NK2	RXRA
GK5	3.63023e-06	1.01081	0.375	0.034	0.119402	NK2	GK5
HLA-DRB1	4.71005e-06	2.2249	1	0.377	0.154918	NK2	HLA-DRB1
TNFSF9	7.327e-06	0.845556	0.75	0.137	0.240992	NK2	TNFSF9
RABEP2	7.59709e-06	0.858121	0.375	0.038	0.249876	NK2	RABEP2
DPM2	7.73607e-06	1.17195	0.625	0.106	0.254447	NK2	DPM2
NCR3.1	8.38478e-06	0.904939	0.5	0.065	0.275784	NK2	NCR3
EOMES	8.89924e-06	1.04079	0.375	0.038	0.292705	NK2	EOMES
ITGA5	9.88303e-06	0.964422	0.375	0.038	0.325063	NK2	ITGA5
PIGBOS1	1.25278e-05	0.947361	0.25	0.017	0.412052	NK2	PIGBOS1
PDCD10	1.35366e-05	1.62092	0.75	0.205	0.445231	NK2	PDCD10
RDH13	1.66984e-05	0.67536	0.25	0.017	0.549229	NK2	RDH13
PI4K2A	1.79315e-05	0.834897	0.25	0.017	0.589785	NK2	PI4K2A
RRM2B	1.79315e-05	0.764473	0.25	0.017	0.589785	NK2	RRM2B
PILRB	1.79315e-05	0.752323	0.25	0.017	0.589785	NK2	PILRB
NOL4L	1.9251e-05	0.747431	0.25	0.017	0.633185	NK2	NOL4L
ZNF589	1.9251e-05	0.709814	0.25	0.017	0.633185	NK2	ZNF589
PRICKLE3	1.9251e-05	0.637979	0.25	0.017	0.633185	NK2	PRICKLE3
MUC12	2.21725e-05	0.727915	0.25	0.017	0.729277	NK2	MUC12
CA11	2.37871e-05	0.551699	0.25	0.017	0.78238	NK2	CA11
PRF1.1	2.46615e-05	1.69279	1	0.37	0.81114	NK2	PRF1
ACBD5	2.59945e-05	0.844156	0.375	0.041	0.854986	NK2	ACBD5
STAP1	3.15606e-05	0.906189	0.125	0.003	1	NK2	STAP1
RARRES1	3.15606e-05	0.862039	0.125	0.003	1	NK2	RARRES1
NOS1AP	3.15606e-05	0.829283	0.125	0.003	1	NK2	NOS1AP
UHRF1	3.15606e-05	0.703611	0.125	0.003	1	NK2	UHRF1
AC231981.1	3.15606e-05	0.656209	0.125	0.003	1	NK2	AC231981.1
PRSS8	3.15606e-05	0.655444	0.125	0.003	1	NK2	PRSS8
ZNF793-AS1	3.15606e-05	0.654689	0.125	0.003	1	NK2	ZNF793-AS1
SAP25	3.15606e-05	0.654511	0.125	0.003	1	NK2	SAP25
AC087241.3	3.15606e-05	0.654511	0.125	0.003	1	NK2	AC087241.3
SLC13A2	3.15606e-05	0.652349	0.125	0.003	1	NK2	SLC13A2
ZNF853	3.15606e-05	0.547834	0.125	0.003	1	NK2	ZNF853
ZSWIM3	3.15606e-05	0.547299	0.125	0.003	1	NK2	ZSWIM3
AC011476.3	3.15606e-05	0.544726	0.125	0.003	1	NK2	AC011476.3
SBK1	3.15606e-05	0.543916	0.125	0.003	1	NK2	SBK1
ABHD15-AS1	3.15606e-05	0.542717	0.125	0.003	1	NK2	ABHD15-AS1
VPS9D1	3.15606e-05	0.542474	0.125	0.003	1	NK2	VPS9D1
NONOP2	3.15606e-05	0.541074	0.125	0.003	1	NK2	NONOP2
TTC30A	3.15606e-05	0.541074	0.125	0.003	1	NK2	TTC30A
AC018761.2	3.15606e-05	0.540996	0.125	0.003	1	NK2	AC018761.2
ZFP30	3.15606e-05	0.540009	0.125	0.003	1	NK2	ZFP30
AC026471.1	3.15606e-05	0.525517	0.125	0.003	1	NK2	AC026471.1
MYH7B	3.15606e-05	0.523014	0.125	0.003	1	NK2	MYH7B
AL161421.1	3.15606e-05	0.520243	0.125	0.003	1	NK2	AL161421.1
PRSS36	3.15606e-05	0.519005	0.125	0.003	1	NK2	PRSS36
THSD1	3.15606e-05	0.517859	0.125	0.003	1	NK2	THSD1
INGX	3.15606e-05	0.496328	0.125	0.003	1	NK2	INGX
CYP1B1	3.15606e-05	0.495034	0.125	0.003	1	NK2	CYP1B1
AC025171.1	3.15606e-05	0.491504	0.125	0.003	1	NK2	AC025171.1
LOXL1	3.15606e-05	0.489924	0.125	0.003	1	NK2	LOXL1
C8orf58	3.15606e-05	0.489477	0.125	0.003	1	NK2	C8orf58
CCND1	3.15606e-05	0.489466	0.125	0.003	1	NK2	CCND1
AC005920.1	3.15606e-05	0.477303	0.125	0.003	1	NK2	AC005920.1
TNK2-AS1	3.15606e-05	0.476725	0.125	0.003	1	NK2	TNK2-AS1
AC072061.1	3.15606e-05	0.474698	0.125	0.003	1	NK2	AC072061.1
RAB25	3.15606e-05	0.474673	0.125	0.003	1	NK2	RAB25
SLC6A8	3.15606e-05	0.472206	0.125	0.003	1	NK2	SLC6A8
SMYD5	3.15606e-05	0.471386	0.125	0.003	1	NK2	SMYD5
VSIG10L	3.15606e-05	0.408433	0.125	0.003	1	NK2	VSIG10L
MCM8	3.15606e-05	0.406787	0.125	0.003	1	NK2	MCM8
TFDP2	3.1977e-05	0.987237	0.375	0.045	1	NK2	TFDP2
ZNF561-AS1	3.58692e-05	0.642606	0.125	0.003	1	NK2	ZNF561-AS1
B3GAT1	3.58692e-05	0.515477	0.125	0.003	1	NK2	B3GAT1
LEXM	3.58692e-05	0.513916	0.125	0.003	1	NK2	LEXM
AC091982.3	3.58692e-05	0.510014	0.125	0.003	1	NK2	AC091982.3
OSBPL5	3.58692e-05	0.507574	0.125	0.003	1	NK2	OSBPL5
AC053527.1	3.58692e-05	0.505861	0.125	0.003	1	NK2	AC053527.1
CLDND2	3.58692e-05	0.493444	0.125	0.003	1	NK2	CLDND2
CENPU	3.58692e-05	0.492735	0.125	0.003	1	NK2	CENPU
AC116407.2	3.58692e-05	0.486137	0.125	0.003	1	NK2	AC116407.2
AL139260.1	3.58692e-05	0.484614	0.125	0.003	1	NK2	AL139260.1
AL161729.1	3.58692e-05	0.483803	0.125	0.003	1	NK2	AL161729.1
FCGR3B	3.58692e-05	0.482158	0.125	0.003	1	NK2	FCGR3B
COL3A1	3.58692e-05	0.477807	0.125	0.003	1	NK2	COL3A1
ZNF34	3.58692e-05	0.468186	0.125	0.003	1	NK2	ZNF34
HBA2	3.58692e-05	0.468186	0.125	0.003	1	NK2	HBA2
AL669831.5	3.58692e-05	0.467423	0.125	0.003	1	NK2	AL669831.5
RAB6B	3.58692e-05	0.46634	0.125	0.003	1	NK2	RAB6B
DNAJC25	3.58692e-05	0.465898	0.125	0.003	1	NK2	DNAJC25
AL122035.1	3.58692e-05	0.465153	0.125	0.003	1	NK2	AL122035.1
ZNF433	3.58692e-05	0.464535	0.125	0.003	1	NK2	ZNF433
SLC35G1	3.58692e-05	0.462942	0.125	0.003	1	NK2	SLC35G1
PALLD	3.58692e-05	0.461824	0.125	0.003	1	NK2	PALLD
ENC1	3.58692e-05	0.46109	0.125	0.003	1	NK2	ENC1
CCL4L2	3.90013e-05	2.19374	0.875	0.267	1	NK2	CCL4L2
APMAP	4.78943e-05	1.25103	0.75	0.185	1	NK2	APMAP
KLRD1.1	5.13638e-05	1.5368	0.875	0.264	1	NK2	KLRD1
UTP15	5.84628e-05	0.849106	0.25	0.021	1	NK2	UTP15
SPON2	5.93649e-05	1.53584	0.75	0.182	1	NK2	SPON2
SH2D1B.1	6.22466e-05	0.796052	0.25	0.021	1	NK2	SH2D1B
GZMB	6.30188e-05	1.43795	1	0.37	1	NK2	GZMB
TRDC.1	6.34045e-05	1.07555	0.375	0.045	1	NK2	TRDC
WWOX	6.34045e-05	0.784037	0.375	0.045	1	NK2	WWOX
CC2D1A	6.46415e-05	1.18129	0.375	0.048	1	NK2	CC2D1A
CHIC1	6.62614e-05	0.668396	0.25	0.021	1	NK2	CHIC1
UCKL1	7.68706e-05	0.976298	0.375	0.048	1	NK2	UCKL1
NCR1.1	7.98275e-05	0.736596	0.25	0.021	1	NK2	NCR1
TRMT6	7.98275e-05	0.605256	0.25	0.021	1	NK2	TRMT6
CST7	8.56121e-05	1.55371	1	0.541	1	NK2	CST7
FAM173A	0.000119455	1.1769	0.625	0.137	1	NK2	FAM173A
CCL4	0.000142395	2.4552	1	0.455	1	NK2	CCL4
SLC25A16.1	0.000155896	0.859521	0.25	0.024	1	NK2	SLC25A16
BHLHE40.1	0.000161424	1.4307	0.75	0.223	1	NK2	BHLHE40
HLA-DPB1	0.000162606	1.66995	0.875	0.356	1	NK2	HLA-DPB1
SUN2	0.00016818	1.12545	0.875	0.257	1	NK2	SUN2
ADRB2	0.000188715	0.833363	0.375	0.051	1	NK2	ADRB2
LAT2.1	0.000188715	0.774937	0.375	0.051	1	NK2	LAT2
SPARC	0.000194877	1.06132	0.25	0.024	1	NK2	SPARC
BCL2A1	0.000209246	0.931639	0.625	0.137	1	NK2	BCL2A1
PLCD1	0.000217641	1.02154	0.25	0.024	1	NK2	PLCD1
NIPBL-DT	0.000217641	0.781836	0.25	0.024	1	NK2	NIPBL-DT
ABCF2.1	0.000217641	0.715051	0.25	0.024	1	NK2	ABCF2.1
ERGIC1.1	0.000226114	1.24536	0.375	0.058	1	NK2	ERGIC1
BORCS6	0.00022933	0.935906	0.375	0.055	1	NK2	BORCS6
BIN1	0.000234732	0.925363	0.875	0.257	1	NK2	BIN1
AC018521.5	0.000242885	0.642337	0.25	0.024	1	NK2	AC018521.5
SPHK2	0.000242885	0.608	0.25	0.024	1	NK2	SPHK2
HLA-DQA1	0.000250776	1.92463	0.625	0.151	1	NK2	HLA-DQA1
TRIM8	0.000253687	0.9541	0.5	0.096	1	NK2	TRIM8
RNF135	0.000256513	0.526425	0.25	0.024	1	NK2	RNF135
C15orf40	0.000264205	0.859886	0.5	0.092	1	NK2	C15orf40
YIPF4.1	0.000265217	1.01543	0.625	0.144	1	NK2	YIPF4
SPRY2.1	0.000270855	0.736322	0.25	0.024	1	NK2	SPRY2
PATL1	0.000277577	0.861262	0.375	0.055	1	NK2	PATL1
KRAS	0.000313191	1.0465	0.875	0.281	1	NK2	KRAS
PDRG1	0.000315887	0.906524	0.375	0.058	1	NK2	PDRG1
UQCC3	0.000339927	0.921605	0.375	0.058	1	NK2	UQCC3
HLA-DRA	0.00038875	1.72397	0.75	0.219	1	NK2	HLA-DRA
RASSF3	0.000420208	0.915765	0.25	0.027	1	NK2	RASSF3
UAP1.1	0.000454264	0.864999	0.375	0.058	1	NK2	UAP1
IP6K1	0.000475833	0.947238	0.5	0.103	1	NK2	IP6K1
HLA-DQB1	0.000485677	1.26429	0.625	0.161	1	NK2	HLA-DQB1
GRN	0.000485898	1.13633	0.375	0.062	1	NK2	GRN
WASH6P	0.000488102	0.832477	0.25	0.027	1	NK2	WASH6P
RTL8A	0.000503152	0.940209	0.375	0.062	1	NK2	RTL8A
AKTIP	0.000505722	0.852686	0.375	0.058	1	NK2	AKTIP
LRR1	0.000512919	0.750017	0.25	0.027	1	NK2	LRR1
COX5A	0.000520543	1.13653	1	0.432	1	NK2	COX5A
TRGC1	0.000538907	0.803997	0.25	0.027	1	NK2	TRGC1
ABRAXAS1	0.000538907	0.707787	0.25	0.027	1	NK2	ABRAXAS1
AC007384.1	0.000581371	1.16515	0.625	0.175	1	NK2	AC007384.1
RNPEPL1	0.00060265	0.880719	0.625	0.151	1	NK2	RNPEPL1
IGLV4-69	0.00062442	0.708115	0.25	0.027	1	NK2	IGLV4-69
AL158071.3	0.00062442	0.697541	0.25	0.027	1	NK2	AL158071.3
CCL3.1	0.000632131	2.77035	0.5	0.113	1	NK2	CCL3
LITAF	0.000699562	1.62019	0.75	0.277	1	NK2	LITAF
XPO5	0.000722421	0.573896	0.25	0.027	1	NK2	XPO5
THAP12	0.000743819	0.947587	0.375	0.065	1	NK2	THAP12
ARID3B.1	0.000791063	0.822094	0.25	0.031	1	NK2	ARID3B
SOS1	0.000813043	0.729649	0.375	0.062	1	NK2	SOS1
PXK	0.000813043	0.707573	0.375	0.062	1	NK2	PXK
TRBV12-4	0.000900285	2.28581	0.125	0.007	1	NK2	TRBV12-4
SSX2IP	0.000900285	0.858034	0.125	0.007	1	NK2	SSX2IP
PLVAP	0.000900285	0.625686	0.125	0.007	1	NK2	PLVAP
MAGI3	0.000900285	0.529126	0.125	0.007	1	NK2	MAGI3
C8orf31	0.000900285	0.528425	0.125	0.007	1	NK2	C8orf31
AL161668.3	0.000900285	0.526427	0.125	0.007	1	NK2	AL161668.3
FRY	0.000900285	0.517307	0.125	0.007	1	NK2	FRY
MGST1	0.000900285	0.514783	0.125	0.007	1	NK2	MGST1
MED12L	0.000900285	0.513775	0.125	0.007	1	NK2	MED12L
ITGAX	0.000900285	0.508937	0.125	0.007	1	NK2	ITGAX
AL049869.3	0.000900285	0.507885	0.125	0.007	1	NK2	AL049869.3
TM6SF1	0.000900285	0.506296	0.125	0.007	1	NK2	TM6SF1
PZP	0.000900285	0.505848	0.125	0.007	1	NK2	PZP
RP9P	0.000900285	0.503866	0.125	0.007	1	NK2	RP9P
CCDC112.1	0.000900285	0.503449	0.125	0.007	1	NK2	CCDC112
RCAN2	0.000900285	0.489196	0.125	0.007	1	NK2	RCAN2
NEU3	0.000900285	0.479299	0.125	0.007	1	NK2	NEU3
THAP2	0.000906474	1.05312	0.375	0.065	1	NK2	THAP2
TMEM241	0.000980738	0.508868	0.125	0.007	1	NK2	TMEM241
FANCM	0.000980738	0.501305	0.125	0.007	1	NK2	FANCM
DTWD2	0.000980738	0.501055	0.125	0.007	1	NK2	DTWD2
FAM86EP	0.000980738	0.501039	0.125	0.007	1	NK2	FAM86EP
AC005839.1	0.000980738	0.496613	0.125	0.007	1	NK2	AC005839.1
BLOC1S3	0.000980738	0.494291	0.125	0.007	1	NK2	BLOC1S3
SLC48A1	0.000980738	0.492098	0.125	0.007	1	NK2	SLC48A1
KLRF1	0.000980738	0.486894	0.125	0.007	1	NK2	KLRF1
SUMO2P17	0.000980738	0.477625	0.125	0.007	1	NK2	SUMO2P17
APOD	0.000980738	0.466727	0.125	0.007	1	NK2	APOD
TMEM143	0.000980738	0.463322	0.125	0.007	1	NK2	TMEM143
SLC39A11	0.000980738	0.462926	0.125	0.007	1	NK2	SLC39A11
HLA-DMB	0.000980738	0.453303	0.125	0.007	1	NK2	HLA-DMB
PLD2	0.000980738	0.445531	0.125	0.007	1	NK2	PLD2
MISP3	0.000980738	0.429007	0.125	0.007	1	NK2	MISP3
NCAM1.1	0.000993134	1.02309	0.25	0.031	1	NK2	NCAM1
APOA2	0.00106781	0.508355	0.125	0.007	1	NK2	APOA2
CXCL5	0.00106781	0.49038	0.125	0.007	1	NK2	CXCL5
AC136475.2	0.00106781	0.466679	0.125	0.007	1	NK2	AC136475.2
BGN	0.00106781	0.461723	0.125	0.007	1	NK2	BGN
AF117829.1	0.00106781	0.444402	0.125	0.007	1	NK2	AF117829.1
FLII	0.00110245	1.27191	0.5	0.13	1	NK2	FLII
BTN3A1	0.00112939	1.24802	0.5	0.13	1	NK2	BTN3A1
RNF141	0.00118813	0.785079	0.25	0.031	1	NK2	RNF141
KIAA0040	0.00121308	0.694196	0.375	0.065	1	NK2	KIAA0040
LINC02001	0.00124213	0.640065	0.25	0.031	1	NK2	LINC02001
TNIP1	0.00124416	1.01562	0.625	0.195	1	NK2	TNIP1
SUPT6H	0.00124704	0.886585	0.5	0.116	1	NK2	SUPT6H
MAPKAP1	0.00126945	0.891146	0.375	0.072	1	NK2	MAPKAP1
UPF1.1	0.00128493	0.856518	0.375	0.068	1	NK2	UPF1
DGKZ	0.00129442	1.05613	0.625	0.171	1	NK2	DGKZ
EPHA1-AS1	0.00129838	0.588311	0.25	0.031	1	NK2	EPHA1-AS1
NLRC5	0.00131359	1.00993	0.5	0.12	1	NK2	NLRC5
CDC34	0.00133805	0.773283	0.5	0.113	1	NK2	CDC34
HDAC1.1	0.00134763	1.11956	0.625	0.199	1	NK2	HDAC1
ZNF48	0.00135697	0.589761	0.25	0.031	1	NK2	ZNF48
ARHGAP27	0.00136754	0.815556	0.375	0.068	1	NK2	ARHGAP27
LIPA	0.00141066	0.790981	0.375	0.068	1	NK2	LIPA
HLA-DMA	0.0014125	1.1401	0.5	0.123	1	NK2	HLA-DMA
KLF2	0.00146672	0.87155	0.875	0.325	1	NK2	KLF2
KRT86.1	0.00148154	0.666996	0.25	0.031	1	NK2	KRT86
MAP3K2	0.00149129	0.896657	0.625	0.168	1	NK2	MAP3K2
CTSW.1	0.00150587	1.79883	0.75	0.298	1	NK2	CTSW
CUTALP	0.00152136	1.05653	0.5	0.12	1	NK2	CUTALP
HDAC3	0.00154906	0.939714	0.5	0.127	1	NK2	HDAC3
MAP9	0.00161657	0.482639	0.25	0.031	1	NK2	MAP9
AOAH.1	0.001668	0.931894	0.625	0.171	1	NK2	AOAH
ZNF721	0.00174368	0.947757	0.5	0.127	1	NK2	ZNF721
MAN2B1	0.0017494	0.764864	0.375	0.068	1	NK2	MAN2B1
XRCC1	0.00187755	0.861616	0.25	0.034	1	NK2	XRCC1
BRI3	0.00193975	1.13055	0.625	0.192	1	NK2	BRI3
PREPL	0.00197507	0.653686	0.375	0.068	1	NK2	PREPL
PPP4R2	0.00202288	0.767263	0.75	0.253	1	NK2	PPP4R2
JAZF1	0.00206157	0.872426	0.375	0.075	1	NK2	JAZF1
CCDC85C	0.00212314	0.740996	0.25	0.034	1	NK2	CCDC85C
PRKACA	0.00221133	0.55465	0.25	0.034	1	NK2	PRKACA
DUSP18	0.00230288	0.663751	0.25	0.034	1	NK2	DUSP18
CDK11B	0.00238058	0.865844	0.375	0.075	1	NK2	CDK11B
SNIP1	0.00239788	0.635098	0.25	0.034	1	NK2	SNIP1
AGPAT1	0.00244957	0.88115	0.375	0.075	1	NK2	AGPAT1
LPIN1	0.00245527	1.04893	0.625	0.192	1	NK2	LPIN1
IFITM1	0.00256328	0.999008	1	0.805	1	NK2	IFITM1
SFXN3	0.00259872	0.484371	0.25	0.034	1	NK2	SFXN3
PRMT2	0.00263988	0.876754	0.75	0.281	1	NK2	PRMT2
CLIC3.1	0.00267714	1.21587	0.625	0.199	1	NK2	CLIC3
SRBD1	0.00277127	0.848113	0.25	0.038	1	NK2	SRBD1
COLGALT1	0.00281484	0.526167	0.25	0.034	1	NK2	COLGALT1
LAIR2	0.00291163	0.815666	0.375	0.072	1	NK2	LAIR2
CD300A.1	0.00292894	0.511383	0.25	0.034	1	NK2	CD300A
CIDEB	0.00299149	0.764262	0.25	0.038	1	NK2	CIDEB
GZMA	0.00311185	0.848182	1	0.476	1	NK2	GZMA
NDUFB7	0.00326034	1.13449	0.75	0.295	1	NK2	NDUFB7
VTI1A	0.00344285	0.892214	0.375	0.082	1	NK2	VTI1A
FBXW2	0.00344285	0.832122	0.375	0.082	1	NK2	FBXW2
COX6B1	0.0034474	0.864281	1	0.647	1	NK2	COX6B1
MIR29B2CHG	0.00348049	0.69896	0.25	0.038	1	NK2	MIR29B2CHG
XPO7	0.00348049	0.676494	0.25	0.038	1	NK2	XPO7
GIT1	0.00375134	0.907427	0.25	0.038	1	NK2	GIT1
PRPSAP2	0.00389088	0.773441	0.375	0.079	1	NK2	PRPSAP2
RPL23AP82	0.00389382	0.527003	0.25	0.038	1	NK2	RPL23AP82
MIAT	0.00393226	0.857704	0.375	0.082	1	NK2	MIAT
IFFO1	0.00404121	0.710547	0.25	0.038	1	NK2	IFFO1
APOPT1	0.00404121	0.53383	0.25	0.038	1	NK2	APOPT1
ENPP4	0.00419364	0.448363	0.25	0.038	1	NK2	ENPP4
CCL3L1	0.00421671	1.00243	0.375	0.079	1	NK2	CCL3L1
SLC12A2	0.00435126	0.633186	0.25	0.038	1	NK2	SLC12A2
TUBGCP6	0.00435126	0.612715	0.25	0.038	1	NK2	TUBGCP6
CSNK1G1	0.00435126	0.456947	0.25	0.038	1	NK2	CSNK1G1
CYBA	0.00449017	0.982003	1	0.839	1	NK2	CYBA
PDCD5	0.00449183	0.916737	0.625	0.226	1	NK2	PDCD5
SUSD6	0.0045671	0.643393	0.375	0.079	1	NK2	SUSD6
RPUSD3	0.00474027	0.801827	0.375	0.086	1	NK2	RPUSD3
EFHD2	0.00479982	1.5619	0.625	0.318	1	NK2	EFHD2
TBPL1	0.004856	0.972549	0.5	0.14	1	NK2	TBPL1
XKR6.1	0.0048569	0.460446	0.25	0.038	1	NK2	XKR6
BAHD1	0.00499727	0.856146	0.125	0.01	1	NK2	BAHD1
CLEC3B	0.00499727	0.82591	0.125	0.01	1	NK2	CLEC3B
RAD51-AS1	0.00499727	0.692882	0.125	0.01	1	NK2	RAD51-AS1
GSEC	0.00499727	0.520793	0.125	0.01	1	NK2	GSEC
TRGV5P	0.00499727	0.519135	0.125	0.01	1	NK2	TRGV5P
GLIDR	0.00499727	0.49609	0.125	0.01	1	NK2	GLIDR
KLRA1P	0.00499727	0.495958	0.125	0.01	1	NK2	KLRA1P
TMEM254	0.00499727	0.495672	0.125	0.01	1	NK2	TMEM254
PNPLA4	0.00499727	0.495099	0.125	0.01	1	NK2	PNPLA4
UBE2Q2P2	0.00499727	0.458836	0.125	0.01	1	NK2	UBE2Q2P2
AGPAT4	0.00499727	0.4493	0.125	0.01	1	NK2	AGPAT4
FAM120C	0.00499727	0.449242	0.125	0.01	1	NK2	FAM120C
HLA-DPA1	0.00502618	0.872028	0.875	0.411	1	NK2	HLA-DPA1
FLNA	0.00509907	0.983119	0.75	0.301	1	NK2	FLNA
ZBTB7A	0.00515942	0.932487	0.625	0.202	1	NK2	ZBTB7A
EMP3	0.00527994	0.986174	0.875	0.538	1	NK2	EMP3
PLA2G2A	0.00532945	0.800435	0.125	0.01	1	NK2	PLA2G2A
MUC3A	0.00532945	0.601724	0.125	0.01	1	NK2	MUC3A
ARHGEF39	0.00532945	0.513427	0.125	0.01	1	NK2	ARHGEF39
ZNF783	0.00532945	0.511146	0.125	0.01	1	NK2	ZNF783
ZSWIM9	0.00532945	0.51084	0.125	0.01	1	NK2	ZSWIM9
GTF3C4	0.00532945	0.509883	0.125	0.01	1	NK2	GTF3C4
AC010609.1	0.00532945	0.491251	0.125	0.01	1	NK2	AC010609.1
ZNF142	0.00532945	0.485922	0.125	0.01	1	NK2	ZNF142
ST8SIA1	0.00532945	0.484394	0.125	0.01	1	NK2	ST8SIA1
PLEKHO2	0.00532945	0.479884	0.125	0.01	1	NK2	PLEKHO2
AP3S2	0.00532945	0.478423	0.125	0.01	1	NK2	AP3S2
ZNF626	0.00532945	0.468787	0.125	0.01	1	NK2	ZNF626
IL1B	0.00532945	0.468373	0.125	0.01	1	NK2	IL1B
PROCA1	0.00532945	0.465888	0.125	0.01	1	NK2	PROCA1
IL15	0.00532945	0.464693	0.125	0.01	1	NK2	IL15
AK1	0.00532945	0.46077	0.125	0.01	1	NK2	AK1
ZNF595	0.00532945	0.443679	0.125	0.01	1	NK2	ZNF595
MXD3	0.00532945	0.438639	0.125	0.01	1	NK2	MXD3
PRR5L	0.00532945	0.438059	0.125	0.01	1	NK2	PRR5L
MAST2	0.00532945	0.418185	0.125	0.01	1	NK2	MAST2
PSD4	0.00537166	1.06563	0.375	0.089	1	NK2	PSD4
ING2	0.00541511	0.421689	0.25	0.038	1	NK2	ING2
GALT	0.00565971	0.808859	0.375	0.086	1	NK2	GALT
DLGAP1-AS2	0.00568144	0.49803	0.125	0.01	1	NK2	DLGAP1-AS2
RAB27B	0.00568144	0.490915	0.125	0.01	1	NK2	RAB27B
RBM47	0.00568144	0.478313	0.125	0.01	1	NK2	RBM47
TNFRSF12A	0.00568144	0.465183	0.125	0.01	1	NK2	TNFRSF12A
ZNF296	0.00568144	0.447399	0.125	0.01	1	NK2	ZNF296
E2F5.1	0.00568144	0.438909	0.125	0.01	1	NK2	E2F5
AC147651.3	0.00568144	0.432799	0.125	0.01	1	NK2	AC147651.3
B3GNT5	0.00568144	0.429514	0.125	0.01	1	NK2	B3GNT5
BX284668.6	0.00568144	0.419847	0.125	0.01	1	NK2	BX284668.6
SERPINB6	0.00580344	0.956326	0.375	0.086	1	NK2	SERPINB6
SARS	0.00582298	0.840059	0.5	0.144	1	NK2	SARS
CD3G.1	0.00588752	-1.83575	0.125	0.647	1	NK2	CD3G
IGHV5-51	0.00591544	0.696514	0.25	0.041	1	NK2	IGHV5-51
ACADS	0.00591544	0.681967	0.25	0.041	1	NK2	ACADS
AK6	0.00591544	0.630156	0.25	0.041	1	NK2	AK6
HMOX1	0.00591544	0.610703	0.25	0.041	1	NK2	HMOX1
RWDD2A	0.00605427	0.468309	0.125	0.01	1	NK2	RWDD2A
CLDN3	0.00605427	0.459158	0.125	0.01	1	NK2	CLDN3
GPR174	0.0060959	0.691524	0.5	0.137	1	NK2	GPR174
ATP5MC3	0.00611556	0.960505	0.875	0.442	1	NK2	ATP5MC3
CLCN3	0.00612285	0.583534	0.25	0.041	1	NK2	CLCN3
LINC00869	0.00622832	0.906138	0.375	0.089	1	NK2	LINC00869
NDEL1	0.00631698	1.01119	0.5	0.154	1	NK2	NDEL1
REXO4	0.00633679	0.629876	0.25	0.041	1	NK2	REXO4
NUP155	0.00655744	0.520644	0.25	0.041	1	NK2	NUP155
WDR89	0.00655744	0.514762	0.25	0.041	1	NK2	WDR89
EBP	0.00656678	0.788408	0.5	0.144	1	NK2	EBP
HTT	0.00701957	0.555403	0.25	0.041	1	NK2	HTT
DYNLRB1	0.0072299	0.952873	0.75	0.332	1	NK2	DYNLRB1
PXN	0.00746185	0.591993	0.375	0.082	1	NK2	PXN
BTBD6	0.00748792	0.783442	0.375	0.092	1	NK2	BTBD6
TUT7	0.00761592	0.643304	0.375	0.086	1	NK2	TUT7
SNRPA	0.00764094	1.04539	0.5	0.171	1	NK2	SNRPA
EPS15	0.00771903	1.04192	0.625	0.233	1	NK2	EPS15
PNKD	0.00773064	0.879051	0.5	0.158	1	NK2	PNKD
ZNF766	0.00776771	0.499434	0.25	0.041	1	NK2	ZNF766
JAK1	0.00786731	0.910704	0.875	0.514	1	NK2	JAK1
MLYCD	0.00798578	0.660391	0.25	0.045	1	NK2	MLYCD
TGFBR3	0.00803252	0.446571	0.25	0.041	1	NK2	TGFBR3
ARRDC3	0.00811836	0.875357	0.375	0.096	1	NK2	ARRDC3
FBXO3	0.00822757	0.780945	0.375	0.092	1	NK2	FBXO3
AP3S1	0.00823709	0.89917	0.625	0.219	1	NK2	AP3S1
TUBGCP3	0.00830539	0.413404	0.25	0.041	1	NK2	TUBGCP3
MOSPD3	0.00830806	1.04335	0.375	0.096	1	NK2	MOSPD3
NUP188	0.0085186	0.584828	0.25	0.045	1	NK2	NUP188
CD74	0.00866026	1.00258	1	0.812	1	NK2	CD74
TERF2	0.00908298	0.727394	0.25	0.045	1	NK2	TERF2
RAB37	0.00908298	0.64993	0.25	0.045	1	NK2	RAB37
ZNF280D	0.00908298	0.641719	0.25	0.045	1	NK2	ZNF280D
TBC1D7	0.00908298	0.5036	0.25	0.045	1	NK2	TBC1D7
NDUFB9	0.00910334	0.805381	0.875	0.452	1	NK2	NDUFB9
SELENOO	0.00919752	0.749814	0.25	0.048	1	NK2	SELENOO
H2AFJ	0.00935061	0.745466	0.5	0.151	1	NK2	H2AFJ
RNF220	0.00936223	0.609084	0.375	0.089	1	NK2	RNF220
ANKRD9	0.0093775	0.628879	0.25	0.045	1	NK2	ANKRD9
KIF3B	0.0093775	0.563658	0.25	0.045	1	NK2	KIF3B
BCL2L12	0.0093775	0.539639	0.25	0.045	1	NK2	BCL2L12
EMC9	0.0093775	0.52269	0.25	0.045	1	NK2	EMC9
C5orf56	0.00943036	0.867927	0.5	0.164	1	NK2	C5orf56
FNBP1	0.00953612	-1.79632	0	0.5	1	NK2	FNBP1
LYRM2	0.00961039	0.912264	0.375	0.106	1	NK2	LYRM2
RPL39L	0.00968051	0.608069	0.25	0.045	1	NK2	RPL39L
POLR3C	0.00968051	0.598292	0.25	0.045	1	NK2	POLR3C
NUP133.1	0.00968051	0.554001	0.25	0.045	1	NK2	NUP133
OCEL1	0.00968051	0.548102	0.25	0.045	1	NK2	OCEL1
MRPS26	0.00975072	0.751139	0.375	0.096	1	NK2	MRPS26
MTSS1	0.00978305	1.07876	0.25	0.048	1	NK2	MTSS1
PSENEN	0.0098766	1.34453	0.5	0.178	1	NK2	PSENEN
CEP104	0.00999222	0.6774	0.25	0.045	1	NK2	CEP104
DMAC2L	0.00999222	0.511074	0.25	0.045	1	NK2	DMAC2L
NME4	0.00999222	0.509846	0.25	0.045	1	NK2	NME4
PDLIM2	0.0099958	1.16978	0.5	0.168	1	NK2	PDLIM2
KIR2DL1	6.89557e-15	1.06049	0.263	0.004	2.26802e-10	CD8_ZNF683	KIR2DL1
LINC02446	4.53905e-13	2.95647	0.632	0.089	1.49294e-08	CD8_ZNF683	LINC02446
TRGV4	1.85637e-12	1.2055	0.421	0.032	6.10579e-08	CD8_ZNF683	TRGV4
TRGC2	2.48846e-12	1.00676	0.421	0.032	8.1848e-08	CD8_ZNF683	TRGC2
ZNF683.1	1.47494e-10	1.65669	0.474	0.057	4.85121e-06	CD8_ZNF683	ZNF683
AC068775.1.1	1.864e-10	1.43921	0.368	0.032	6.13088e-06	CD8_ZNF683	AC068775.1
KLRC3	4.92467e-10	1.45402	0.474	0.06	1.61977e-05	CD8_ZNF683	KLRC3
KLRC2.1	5.32186e-10	1.63652	0.526	0.078	1.75041e-05	CD8_ZNF683	KLRC2
KIR3DL2	2.82872e-09	0.940689	0.316	0.025	9.30395e-05	CD8_ZNF683	KIR3DL2
CD160	3.09613e-09	0.913733	0.368	0.036	0.000101835	CD8_ZNF683	CD160
AL645939.5	1.57547e-08	0.671551	0.158	0.004	0.000518189	CD8_ZNF683	AL645939.5
TRPM2	1.70663e-08	0.439426	0.158	0.004	0.000561327	CD8_ZNF683	TRPM2
KLRD1.2	1.75223e-08	1.50526	0.842	0.242	0.000576327	CD8_ZNF683	KLRD1
AOAH.2	2.51446e-08	1.03024	0.684	0.149	0.000827031	CD8_ZNF683	AOAH
DDX11	5.38678e-08	0.479438	0.105	0	0.00177177	CD8_ZNF683	DDX11
GLB1L2	5.38678e-08	0.456412	0.105	0	0.00177177	CD8_ZNF683	GLB1L2
GZMH.1	5.70326e-08	1.48974	0.842	0.267	0.00187586	CD8_ZNF683	GZMH
CCL5.1	8.16411e-08	1.50302	1	0.544	0.00268526	CD8_ZNF683	CCL5
LGALS1	2.70266e-07	1.01816	0.947	0.363	0.00888933	CD8_ZNF683	LGALS1
MVB12B	2.80884e-07	0.921985	0.421	0.068	0.00923856	CD8_ZNF683	MVB12B
AAAS	2.96236e-07	0.844825	0.211	0.014	0.00974351	CD8_ZNF683	AAAS
GNLY.2	3.84778e-07	2.38473	0.632	0.178	0.0126557	CD8_ZNF683	GNLY
KIR2DL4.1	4.56026e-07	0.798587	0.474	0.082	0.0149992	CD8_ZNF683	KIR2DL4
HOPX.1	7.72432e-07	1.42735	0.737	0.235	0.0254061	CD8_ZNF683	HOPX
FAM49A	7.74986e-07	0.537089	0.158	0.007	0.0254901	CD8_ZNF683	FAM49A
KIR2DS4	8.255e-07	0.864995	0.158	0.007	0.0271515	CD8_ZNF683	KIR2DS4
ATXN7L3B	1.30767e-06	0.986179	0.368	0.06	0.0430105	CD8_ZNF683	ATXN7L3B
HLTF	1.36651e-06	0.747275	0.316	0.043	0.044946	CD8_ZNF683	HLTF
LAT2.2	1.66786e-06	0.71187	0.316	0.043	0.0548576	CD8_ZNF683	LAT2
GZMB.1	1.78694e-06	1.06519	0.895	0.352	0.0587743	CD8_ZNF683	GZMB
SPRY2.2	2.00454e-06	0.918113	0.211	0.018	0.0659314	CD8_ZNF683	SPRY2
LINC02132	2.40553e-06	0.460511	0.211	0.018	0.0791202	CD8_ZNF683	LINC02132
KIAA1109	2.68741e-06	0.810726	0.368	0.06	0.0883917	CD8_ZNF683	KIAA1109
ETF1	3.27568e-06	0.949334	0.526	0.128	0.10774	CD8_ZNF683	ETF1
DNMT3A	3.96374e-06	0.820614	0.263	0.032	0.130371	CD8_ZNF683	DNMT3A
VPS37B	5.43691e-06	1.40549	0.684	0.238	0.178826	CD8_ZNF683	VPS37B
PRF1.2	6.34869e-06	0.896616	0.895	0.352	0.208815	CD8_ZNF683	PRF1
CD63.1	8.30025e-06	1.25193	0.789	0.335	0.273004	CD8_ZNF683	CD63
TRGV8	8.54831e-06	0.70664	0.158	0.011	0.281162	CD8_ZNF683	TRGV8
RB1	8.9024e-06	0.91903	0.421	0.089	0.292809	CD8_ZNF683	RB1
STAG3L5P-PVRIG2P-PILRB	8.91398e-06	0.706502	0.211	0.021	0.29319	CD8_ZNF683	STAG3L5P-PVRIG2P-PILRB
HRASLS2	9.00834e-06	0.498984	0.158	0.011	0.296293	CD8_ZNF683	HRASLS2
AP1B1	9.28076e-06	0.681721	0.316	0.05	0.305254	CD8_ZNF683	AP1B1
KIR3DL1	9.49198e-06	1.06494	0.158	0.011	0.312201	CD8_ZNF683	KIR3DL1
NKG7.1	1.51561e-05	0.726782	1	0.466	0.498499	CD8_ZNF683	NKG7
KLHDC1	1.7317e-05	0.5875	0.105	0.004	0.569573	CD8_ZNF683	KLHDC1
DYNC2H1	1.7317e-05	0.450767	0.105	0.004	0.569573	CD8_ZNF683	DYNC2H1
AC136475.1	1.7317e-05	0.424577	0.105	0.004	0.569573	CD8_ZNF683	AC136475.1
DEPP1	1.7317e-05	0.408369	0.105	0.004	0.569573	CD8_ZNF683	DEPP1
TYROBP.2	2.19484e-05	1.04393	0.368	0.071	0.721906	CD8_ZNF683	TYROBP
GSTP1.1	2.33685e-05	0.926499	0.895	0.473	0.768614	CD8_ZNF683	GSTP1
ACIN1	2.53889e-05	0.81009	0.526	0.139	0.835066	CD8_ZNF683	ACIN1
ACCS	2.61508e-05	0.807297	0.211	0.025	0.860126	CD8_ZNF683	ACCS
SIRT2	2.67116e-05	1.03914	0.368	0.078	0.878573	CD8_ZNF683	SIRT2
TRGV2	2.67692e-05	1.36227	0.368	0.082	0.880465	CD8_ZNF683	TRGV2
COTL1	3.09829e-05	0.974802	0.947	0.633	1	CD8_ZNF683	COTL1
ITPK1.1	3.22781e-05	0.589519	0.316	0.057	1	CD8_ZNF683	ITPK1
AUTS2	3.28657e-05	1.418	0.474	0.128	1	CD8_ZNF683	AUTS2
ARHGAP18	3.29054e-05	1.09592	0.421	0.11	1	CD8_ZNF683	ARHGAP18
MAP3K14	3.40295e-05	0.752116	0.316	0.057	1	CD8_ZNF683	MAP3K14
ZMPSTE24.1	3.68396e-05	0.576049	0.263	0.039	1	CD8_ZNF683	ZMPSTE24
ATL2	3.91713e-05	0.606122	0.211	0.025	1	CD8_ZNF683	ATL2
HCST	4.35537e-05	0.76565	1	0.705	1	CD8_ZNF683	HCST
ASPH	4.52796e-05	0.551759	0.211	0.025	1	CD8_ZNF683	ASPH
TGFB1.1	4.96977e-05	1.1616	0.842	0.459	1	CD8_ZNF683	TGFB1
CLIC3.2	4.97892e-05	0.960783	0.579	0.185	1	CD8_ZNF683	CLIC3
CAPN2	5.16623e-05	0.707252	0.579	0.171	1	CD8_ZNF683	CAPN2
HLA-DRB1.1	5.34361e-05	1.15827	0.789	0.367	1	CD8_ZNF683	HLA-DRB1
MRPL40	5.48142e-05	0.897264	0.316	0.064	1	CD8_ZNF683	MRPL40
MTHFD2L	5.4912e-05	0.663385	0.158	0.014	1	CD8_ZNF683	MTHFD2L
SLC27A2	5.56559e-05	0.819477	0.263	0.043	1	CD8_ZNF683	SLC27A2
MAP3K8.1	5.8674e-05	1.06397	0.632	0.203	1	CD8_ZNF683	MAP3K8
ITGA1.1	6.00048e-05	0.978285	0.474	0.135	1	CD8_ZNF683	ITGA1
ARIH2OS	6.00098e-05	0.650604	0.158	0.014	1	CD8_ZNF683	ARIH2OS
SCUBE1	6.00098e-05	0.578436	0.158	0.014	1	CD8_ZNF683	SCUBE1
TRAV5	6.27238e-05	1.02382	0.158	0.014	1	CD8_ZNF683	TRAV5
PBRM1	6.91042e-05	1.00442	0.421	0.11	1	CD8_ZNF683	PBRM1
CIZ1	7.04936e-05	0.701155	0.316	0.06	1	CD8_ZNF683	CIZ1
MT-ND6	7.19151e-05	0.920606	0.842	0.434	1	CD8_ZNF683	MT-ND6
CD101	7.62261e-05	0.716243	0.211	0.028	1	CD8_ZNF683	CD101
NOP2	7.98011e-05	0.669736	0.316	0.06	1	CD8_ZNF683	NOP2
LINC01871	8.05024e-05	0.907962	0.579	0.181	1	CD8_ZNF683	LINC01871
CD8A	8.54727e-05	1.06989	0.842	0.359	1	CD8_ZNF683	CD8A
HGH1	9.31893e-05	0.542967	0.211	0.028	1	CD8_ZNF683	HGH1
ITGAL	9.57473e-05	0.742397	0.526	0.153	1	CD8_ZNF683	ITGAL
USP1	0.000104398	0.836965	0.421	0.107	1	CD8_ZNF683	USP1
ATP9B	0.000104826	0.729059	0.368	0.082	1	CD8_ZNF683	ATP9B
PTPN22	0.000108606	1.26962	0.632	0.263	1	CD8_ZNF683	PTPN22
METRNL	0.000124935	1.23633	0.474	0.153	1	CD8_ZNF683	METRNL
SNX14	0.000127796	0.666604	0.263	0.046	1	CD8_ZNF683	SNX14
DAPK2.1	0.000130783	0.734999	0.316	0.064	1	CD8_ZNF683	DAPK2
UBASH3A	0.00014798	0.736681	0.368	0.089	1	CD8_ZNF683	UBASH3A
ITGB7	0.000151703	1.42121	0.526	0.21	1	CD8_ZNF683	ITGB7
SLA2	0.000156634	0.628625	0.526	0.149	1	CD8_ZNF683	SLA2
STX17	0.00015697	0.768322	0.316	0.068	1	CD8_ZNF683	STX17
DUSP5	0.000158314	1.1869	0.684	0.306	1	CD8_ZNF683	DUSP5
RNF213	0.00016661	0.786115	0.947	0.523	1	CD8_ZNF683	RNF213
NIPA1	0.000171524	0.541659	0.263	0.046	1	CD8_ZNF683	NIPA1
LITAF.1	0.000175985	1.1694	0.632	0.267	1	CD8_ZNF683	LITAF
CLN3	0.000176131	0.517858	0.263	0.046	1	CD8_ZNF683	CLN3
GLIPR2	0.000192226	0.861951	0.526	0.174	1	CD8_ZNF683	GLIPR2
HLA-DRB5	0.000198677	1.20109	0.474	0.149	1	CD8_ZNF683	HLA-DRB5
ZEB2	0.000199429	0.937549	0.579	0.203	1	CD8_ZNF683	ZEB2
VPS41	0.000206306	0.422443	0.263	0.046	1	CD8_ZNF683	VPS41
NOP14-AS1	0.000208118	0.655513	0.263	0.05	1	CD8_ZNF683	NOP14-AS1
TRGV5	0.000214608	1.04859	0.158	0.018	1	CD8_ZNF683	TRGV5
CCR9	0.000214608	0.840664	0.158	0.018	1	CD8_ZNF683	CCR9
NCKAP1L	0.000217908	0.617409	0.526	0.16	1	CD8_ZNF683	NCKAP1L
MT-CO1	0.000234986	0.522855	1	1	1	CD8_ZNF683	MT-CO1
TMEM38B	0.000240853	0.432311	0.158	0.018	1	CD8_ZNF683	TMEM38B
MTG2.1	0.000240998	0.678388	0.211	0.032	1	CD8_ZNF683	MTG2
PITHD1	0.000241334	0.719397	0.579	0.203	1	CD8_ZNF683	PITHD1
CST7.1	0.000242017	0.996713	0.895	0.53	1	CD8_ZNF683	CST7
GZMA.1	0.000244777	0.910407	0.842	0.466	1	CD8_ZNF683	GZMA
RPS14	0.000247891	-0.727727	1	0.993	1	CD8_ZNF683	RPS14
LYPLA1	0.000252779	0.877368	0.474	0.142	1	CD8_ZNF683	LYPLA1
ABHD17A	0.000258284	0.98644	0.737	0.32	1	CD8_ZNF683	ABHD17A
AGO1	0.000270086	0.424356	0.158	0.018	1	CD8_ZNF683	AGO1
LAG3	0.00027519	0.544267	0.684	0.274	1	CD8_ZNF683	LAG3
ACSL3	0.000275689	0.725949	0.316	0.071	1	CD8_ZNF683	ACSL3
USP19	0.000280243	0.581348	0.211	0.032	1	CD8_ZNF683	USP19
CCDC77	0.000280548	0.495473	0.158	0.018	1	CD8_ZNF683	CCDC77
ACY1	0.000280548	0.412961	0.158	0.018	1	CD8_ZNF683	ACY1
OASL	0.000298066	0.940484	0.474	0.142	1	CD8_ZNF683	OASL
GOLM1	0.000302621	0.487032	0.158	0.018	1	CD8_ZNF683	GOLM1
PACS2	0.000304008	0.515129	0.263	0.05	1	CD8_ZNF683	PACS2
AC017104.1.1	0.000305514	0.658945	0.105	0.007	1	CD8_ZNF683	AC017104.1
FARP2	0.000305514	0.410275	0.105	0.007	1	CD8_ZNF683	FARP2
AC027290.2	0.000311687	0.558755	0.263	0.05	1	CD8_ZNF683	AC027290.2
BEND4	0.000322126	0.492287	0.105	0.007	1	CD8_ZNF683	BEND4
CIPC	0.000322126	0.459099	0.105	0.007	1	CD8_ZNF683	CIPC
AC145124.1	0.000322126	0.458976	0.105	0.007	1	CD8_ZNF683	AC145124.1
ARHGAP19	0.000322126	0.458452	0.105	0.007	1	CD8_ZNF683	ARHGAP19
CCL4L2.1	0.000323562	-0.438402	0.684	0.256	1	CD8_ZNF683	CCL4L2
FAM214A	0.000358887	0.756342	0.368	0.1	1	CD8_ZNF683	FAM214A
BCAS4	0.00036107	0.790553	0.316	0.075	1	CD8_ZNF683	BCAS4
POLR3E	0.000380669	0.52847	0.316	0.071	1	CD8_ZNF683	POLR3E
ORAI3	0.000388448	0.663879	0.211	0.036	1	CD8_ZNF683	ORAI3
RPS8	0.000393817	-0.76627	1	0.996	1	CD8_ZNF683	RPS8
UBE2J1	0.000418743	0.678025	0.474	0.146	1	CD8_ZNF683	UBE2J1
ATP8A1	0.000421435	0.791372	0.421	0.121	1	CD8_ZNF683	ATP8A1
SDCCAG8	0.000441801	0.676874	0.263	0.053	1	CD8_ZNF683	SDCCAG8
LSP1	0.000442533	0.653822	1	0.698	1	CD8_ZNF683	LSP1
CTDP1	0.000452429	0.715927	0.263	0.053	1	CD8_ZNF683	CTDP1
VAMP3	0.000486658	0.679179	0.211	0.036	1	CD8_ZNF683	VAMP3
IGHV3-30	0.000486658	0.526024	0.211	0.036	1	CD8_ZNF683	IGHV3-30
CAPG	0.000497484	1.23296	0.632	0.274	1	CD8_ZNF683	CAPG
RBM15	0.000514597	0.521183	0.211	0.036	1	CD8_ZNF683	RBM15
SSH1	0.000517496	0.819144	0.368	0.103	1	CD8_ZNF683	SSH1
IKZF2	0.000519562	0.695585	0.368	0.096	1	CD8_ZNF683	IKZF2
HMGCR	0.000529115	0.581636	0.211	0.036	1	CD8_ZNF683	HMGCR
RBCK1	0.000532966	0.63224	0.632	0.231	1	CD8_ZNF683	RBCK1
ZBP1	0.000542293	0.866333	0.368	0.107	1	CD8_ZNF683	ZBP1
IGLV2-23	0.00054645	0.512476	0.263	0.053	1	CD8_ZNF683	IGLV2-23
GABARAPL1	0.000572559	0.825178	0.632	0.267	1	CD8_ZNF683	GABARAPL1
SMIM10L1	0.000582673	0.661165	0.421	0.125	1	CD8_ZNF683	SMIM10L1
ODC1	0.000599199	0.958714	0.632	0.285	1	CD8_ZNF683	ODC1
PRRC2B	0.000615172	1.21194	0.421	0.149	1	CD8_ZNF683	PRRC2B
LPAR2	0.000641778	0.825988	0.474	0.167	1	CD8_ZNF683	LPAR2
SIRT3.1	0.00064453	0.534333	0.158	0.021	1	CD8_ZNF683	SIRT3
DROSHA	0.000666743	0.657979	0.158	0.021	1	CD8_ZNF683	DROSHA
TUBGCP4	0.000689666	0.716937	0.158	0.021	1	CD8_ZNF683	TUBGCP4
GRIPAP1	0.000689996	0.581465	0.211	0.039	1	CD8_ZNF683	GRIPAP1
VIM-AS1	0.000710458	0.523948	0.263	0.057	1	CD8_ZNF683	VIM-AS1
RAB24	0.00074312	0.574812	0.263	0.057	1	CD8_ZNF683	RAB24
CRTAM	0.000744816	0.54731	0.368	0.1	1	CD8_ZNF683	CRTAM
PSMA3	0.000747517	0.979873	0.526	0.214	1	CD8_ZNF683	PSMA3
ECSIT	0.000754831	0.453249	0.316	0.075	1	CD8_ZNF683	ECSIT
TWSG1	0.000788882	0.491278	0.158	0.021	1	CD8_ZNF683	TWSG1
RPL3	0.000799427	-0.907166	0.947	0.964	1	CD8_ZNF683	RPL3
NDRG3	0.000807796	0.639422	0.211	0.039	1	CD8_ZNF683	NDRG3
NIN	0.000836064	0.408677	0.421	0.121	1	CD8_ZNF683	NIN
PFN1	0.00083992	0.576698	1	0.968	1	CD8_ZNF683	PFN1
PIK3R1	0.000870424	1.21992	0.737	0.359	1	CD8_ZNF683	PIK3R1
RAB21	0.000884218	0.600186	0.368	0.107	1	CD8_ZNF683	RAB21
CTSW.2	0.000885169	1.28912	0.579	0.292	1	CD8_ZNF683	CTSW
SYNGR1.1	0.000888215	0.807887	0.263	0.057	1	CD8_ZNF683	SYNGR1
PAXX	0.000930583	0.849914	0.789	0.441	1	CD8_ZNF683	PAXX
MAP4	0.00096716	0.648522	0.526	0.185	1	CD8_ZNF683	MAP4
HIP1.1	0.00096871	0.518636	0.211	0.039	1	CD8_ZNF683	HIP1
RFNG	0.00096871	0.508411	0.211	0.039	1	CD8_ZNF683	RFNG
PCIF1	0.000996544	0.665519	0.368	0.107	1	CD8_ZNF683	PCIF1
CLASP1	0.00100495	0.685858	0.263	0.06	1	CD8_ZNF683	CLASP1
ESS2	0.0011013	0.406535	0.211	0.039	1	CD8_ZNF683	ESS2
SPOCK2	0.00110215	-1.61427	0.158	0.523	1	CD8_ZNF683	SPOCK2
PPP4R3B	0.00117419	0.478886	0.368	0.1	1	CD8_ZNF683	PPP4R3B
RPP30	0.00118958	0.694992	0.316	0.085	1	CD8_ZNF683	RPP30
CD27	0.00119048	-1.74574	0	0.381	1	CD8_ZNF683	CD27
ZYX	0.00124039	0.849732	0.684	0.363	1	CD8_ZNF683	ZYX
AC245100.8	0.00125897	0.723733	0.368	0.11	1	CD8_ZNF683	AC245100.8
PPM1D	0.00130121	0.630797	0.368	0.11	1	CD8_ZNF683	PPM1D
CD8B	0.00144938	0.859835	0.632	0.288	1	CD8_ZNF683	CD8B
CEMIP2	0.00147277	0.783679	0.684	0.331	1	CD8_ZNF683	CEMIP2
H2AFX	0.00148356	0.582899	0.368	0.11	1	CD8_ZNF683	H2AFX
SKIL	0.00149264	0.791879	0.474	0.167	1	CD8_ZNF683	SKIL
BID	0.00150219	0.545572	0.263	0.06	1	CD8_ZNF683	BID
SEC14L1	0.00156513	0.530653	0.368	0.107	1	CD8_ZNF683	SEC14L1
ALAS1	0.00160777	0.619684	0.211	0.043	1	CD8_ZNF683	ALAS1
RPL13	0.00161363	-0.603149	1	0.996	1	CD8_ZNF683	RPL13
PDCD2	0.00161382	0.660914	0.421	0.135	1	CD8_ZNF683	PDCD2
PPIE	0.00163342	0.446693	0.316	0.082	1	CD8_ZNF683	PPIE
CRCP	0.00166639	0.440737	0.263	0.06	1	CD8_ZNF683	CRCP
B3GALT6	0.00168684	0.521876	0.211	0.043	1	CD8_ZNF683	B3GALT6
FLNA.1	0.00168816	0.863258	0.579	0.295	1	CD8_ZNF683	FLNA
ECH1	0.0016923	0.709769	0.789	0.402	1	CD8_ZNF683	ECH1
RPL39	0.00172263	-0.655335	0.947	0.996	1	CD8_ZNF683	RPL39
BIK	0.00174766	0.449202	0.105	0.011	1	CD8_ZNF683	BIK
POP7	0.00176947	0.558939	0.211	0.043	1	CD8_ZNF683	POP7
IL7R.1	0.0018183	-1.5627	0.211	0.63	1	CD8_ZNF683	IL7R
KCTD18	0.00182241	0.434937	0.105	0.011	1	CD8_ZNF683	KCTD18
TRDC.2	0.00185581	0.695497	0.211	0.043	1	CD8_ZNF683	TRDC
PTPN11	0.00186029	0.50908	0.368	0.11	1	CD8_ZNF683	PTPN11
BPNT1	0.00190008	0.502353	0.105	0.011	1	CD8_ZNF683	BPNT1
APOL1	0.00190008	0.487117	0.105	0.011	1	CD8_ZNF683	APOL1
STK39	0.00191325	0.747014	0.316	0.093	1	CD8_ZNF683	STK39
LTB	0.00191486	-2.0687	0.158	0.509	1	CD8_ZNF683	LTB
DBN1.1	0.00194601	0.508259	0.211	0.043	1	CD8_ZNF683	DBN1
UBE2K	0.0020027	0.644862	0.474	0.171	1	CD8_ZNF683	UBE2K
SERPINB9	0.00206169	0.829732	0.526	0.249	1	CD8_ZNF683	SERPINB9
MGMT	0.00206805	0.671944	0.526	0.21	1	CD8_ZNF683	MGMT
RPS23	0.00207244	-0.624349	1	0.996	1	CD8_ZNF683	RPS23
RPL10	0.00208197	-0.55283	1	1	1	CD8_ZNF683	RPL10
HPRT1	0.00208496	0.587133	0.474	0.171	1	CD8_ZNF683	HPRT1
SUPV3L1	0.00208555	0.644722	0.316	0.089	1	CD8_ZNF683	SUPV3L1
RUBCN	0.00208886	0.453415	0.211	0.043	1	CD8_ZNF683	RUBCN
TOR1B	0.00209983	0.809471	0.211	0.046	1	CD8_ZNF683	TOR1B
MXRA7	0.00212076	0.701239	0.316	0.093	1	CD8_ZNF683	MXRA7
ARID5B	0.00212778	-1.5313	0	0.352	1	CD8_ZNF683	ARID5B
LPCAT1	0.00215258	0.450183	0.263	0.064	1	CD8_ZNF683	LPCAT1
CAPNS1	0.00216736	0.764383	0.579	0.263	1	CD8_ZNF683	CAPNS1
EIF2S3	0.00217222	0.621575	0.526	0.206	1	CD8_ZNF683	EIF2S3
DUSP2	0.00224108	0.702454	0.947	0.626	1	CD8_ZNF683	DUSP2
ATP5ME	0.00228526	0.750289	0.579	0.27	1	CD8_ZNF683	ATP5ME
CD7.1	0.00240921	0.774023	0.895	0.765	1	CD8_ZNF683	CD7
XCL2.1	0.00246461	1.15684	0.474	0.189	1	CD8_ZNF683	XCL2
YWHAG	0.00254017	0.773991	0.316	0.096	1	CD8_ZNF683	YWHAG
RANBP2	0.00256556	0.630301	0.579	0.256	1	CD8_ZNF683	RANBP2
MOB3A	0.00259382	0.665041	0.368	0.125	1	CD8_ZNF683	MOB3A
PFKP	0.0026432	0.586241	0.368	0.117	1	CD8_ZNF683	PFKP
PPM1M	0.00264496	0.795951	0.316	0.1	1	CD8_ZNF683	PPM1M
DHX40	0.00269344	0.519038	0.211	0.046	1	CD8_ZNF683	DHX40
GOLGB1	0.00278426	1.09578	0.474	0.196	1	CD8_ZNF683	GOLGB1
MICU2	0.00287897	0.792328	0.316	0.103	1	CD8_ZNF683	MICU2
SLF1	0.00293929	0.439499	0.263	0.068	1	CD8_ZNF683	SLF1
ACOT7.1	0.00297576	0.563066	0.263	0.071	1	CD8_ZNF683	ACOT7
HMGB2	0.00297634	0.76324	0.789	0.491	1	CD8_ZNF683	HMGB2
MT-ND5	0.00298192	0.610957	0.947	0.751	1	CD8_ZNF683	MT-ND5
PLA2G16	0.00312093	0.507692	0.368	0.117	1	CD8_ZNF683	PLA2G16
TLN1	0.0031385	0.637108	0.684	0.356	1	CD8_ZNF683	TLN1
B4GALT1	0.00321336	0.693249	0.474	0.189	1	CD8_ZNF683	B4GALT1
PDIA3	0.00325974	0.583668	0.842	0.566	1	CD8_ZNF683	PDIA3
TRIR	0.00328061	0.724893	0.789	0.463	1	CD8_ZNF683	TRIR
CMC4	0.00328912	0.475053	0.211	0.046	1	CD8_ZNF683	CMC4
MFSD5	0.00336223	0.438271	0.211	0.046	1	CD8_ZNF683	MFSD5
KRT86.2	0.00349378	0.673861	0.158	0.028	1	CD8_ZNF683	KRT86
DXO	0.00349378	0.495139	0.158	0.028	1	CD8_ZNF683	DXO
NDUFAF7	0.00349378	0.41155	0.158	0.028	1	CD8_ZNF683	NDUFAF7
AC020659.1	0.00358904	0.568765	0.158	0.028	1	CD8_ZNF683	AC020659.1
LCK	0.0036473	0.657904	0.842	0.591	1	CD8_ZNF683	LCK
CLIC1	0.00367453	0.702509	0.947	0.73	1	CD8_ZNF683	CLIC1
IGHV1-46	0.00368667	0.533516	0.158	0.028	1	CD8_ZNF683	IGHV1-46
GYG1	0.00374288	0.690668	0.474	0.196	1	CD8_ZNF683	GYG1
PGRMC1	0.00375047	0.443688	0.211	0.046	1	CD8_ZNF683	PGRMC1
DIAPH1	0.00377886	1.13382	0.421	0.178	1	CD8_ZNF683	DIAPH1
RPL36.1	0.00387225	-0.674062	0.947	0.979	1	CD8_ZNF683	RPL36
EEF1A1	0.00388932	-0.677928	1	0.996	1	CD8_ZNF683	EEF1A1
NDUFA7	0.00391767	0.539103	0.263	0.071	1	CD8_ZNF683	NDUFA7
NDUFAF4	0.00392724	0.895397	0.263	0.075	1	CD8_ZNF683	NDUFAF4
RNF113A	0.00394851	0.518256	0.474	0.171	1	CD8_ZNF683	RNF113A
YARS	0.00395006	0.750878	0.316	0.1	1	CD8_ZNF683	YARS
ATP8B4.1	0.00396317	0.458684	0.263	0.068	1	CD8_ZNF683	ATP8B4
PIK3AP1.1	0.00396317	0.419684	0.263	0.068	1	CD8_ZNF683	PIK3AP1
PSMB9	0.0040257	0.5802	0.895	0.587	1	CD8_ZNF683	PSMB9
CD2AP	0.00403681	0.446527	0.263	0.068	1	CD8_ZNF683	CD2AP
ATP5MD	0.00410141	0.533358	0.737	0.359	1	CD8_ZNF683	ATP5MD
NSMCE2	0.00417402	0.48045	0.211	0.05	1	CD8_ZNF683	NSMCE2
KPNA2	0.00422223	0.705909	0.368	0.128	1	CD8_ZNF683	KPNA2
RAD54L2	0.00432484	0.420184	0.158	0.028	1	CD8_ZNF683	RAD54L2
LCP1	0.00436764	0.704246	0.789	0.591	1	CD8_ZNF683	LCP1
RPL9	0.00446983	-0.785062	0.842	0.915	1	CD8_ZNF683	RPL9
THAP4	0.00447704	0.413464	0.316	0.096	1	CD8_ZNF683	THAP4
GALNT2	0.00452399	0.423334	0.263	0.071	1	CD8_ZNF683	GALNT2
HACD4	0.00464648	0.50735	0.368	0.121	1	CD8_ZNF683	HACD4
ICAM1.1	0.00474451	0.76029	0.263	0.078	1	CD8_ZNF683	ICAM1
PSMD6	0.00479145	1.01502	0.421	0.178	1	CD8_ZNF683	PSMD6
KANSL2	0.00482321	0.939644	0.316	0.103	1	CD8_ZNF683	KANSL2
UBE2R2	0.00494489	0.411278	0.263	0.071	1	CD8_ZNF683	UBE2R2
UBE2S	0.00500268	0.488746	0.737	0.377	1	CD8_ZNF683	UBE2S
REL	0.00505642	0.61502	0.737	0.367	1	CD8_ZNF683	REL
KLRC1.1	0.00507519	1.1508	0.368	0.132	1	CD8_ZNF683	KLRC1
C11orf98	0.00510702	0.703753	0.421	0.171	1	CD8_ZNF683	C11orf98
GPR183	0.00518707	-1.62303	0.105	0.413	1	CD8_ZNF683	GPR183
ABCA2	0.00524362	0.405864	0.211	0.05	1	CD8_ZNF683	ABCA2
GIMAP7	0.0052598	-1.23759	0.105	0.448	1	CD8_ZNF683	GIMAP7
GFI1	0.00544604	0.657908	0.316	0.103	1	CD8_ZNF683	GFI1
CCNB1IP1	0.00547705	0.540899	0.263	0.075	1	CD8_ZNF683	CCNB1IP1
SIKE1	0.00548575	0.471873	0.316	0.096	1	CD8_ZNF683	SIKE1
SH3BGRL3	0.00553801	0.554079	1	0.932	1	CD8_ZNF683	SH3BGRL3
ALOX5AP	0.00555374	0.72704	0.737	0.477	1	CD8_ZNF683	ALOX5AP
RPL14	0.00561381	-0.566782	0.947	0.975	1	CD8_ZNF683	RPL14
NDUFA5	0.00565768	0.711224	0.474	0.203	1	CD8_ZNF683	NDUFA5
ZNF257	0.00566855	0.460414	0.105	0.014	1	CD8_ZNF683	ZNF257
UBE2F	0.00571124	0.571574	0.211	0.053	1	CD8_ZNF683	UBE2F
HNRNPD	0.00573369	0.794296	0.632	0.338	1	CD8_ZNF683	HNRNPD
SF3B6	0.0057719	0.410927	0.526	0.196	1	CD8_ZNF683	SF3B6
WDFY1	0.00596772	0.530696	0.263	0.075	1	CD8_ZNF683	WDFY1
SH3GLB2	0.00596772	0.467715	0.263	0.075	1	CD8_ZNF683	SH3GLB2
C12orf75	0.00602318	0.773571	0.421	0.174	1	CD8_ZNF683	C12orf75
TRAV17	0.00607277	1.08578	0.105	0.014	1	CD8_ZNF683	TRAV17
RPL6	0.00607795	-0.577681	0.947	0.986	1	CD8_ZNF683	RPL6
DNAJC3	0.00611565	0.667898	0.368	0.139	1	CD8_ZNF683	DNAJC3
URI1	0.00612343	0.496283	0.526	0.214	1	CD8_ZNF683	URI1
GRWD1	0.00617483	0.471557	0.263	0.075	1	CD8_ZNF683	GRWD1
AGTPBP1	0.00620818	0.54157	0.158	0.032	1	CD8_ZNF683	AGTPBP1
MSH6	0.00642864	0.635531	0.211	0.053	1	CD8_ZNF683	MSH6
PRKACB	0.00643206	0.71103	0.421	0.181	1	CD8_ZNF683	PRKACB
FMNL1	0.00651608	0.782662	0.579	0.281	1	CD8_ZNF683	FMNL1
TRBV3-1	0.0065187	1.38886	0.158	0.032	1	CD8_ZNF683	TRBV3-1
MT-CO2.1	0.00660334	0.468461	1	1	1	CD8_ZNF683	MT-CO2
STAU1	0.00665384	0.733651	0.421	0.178	1	CD8_ZNF683	STAU1
RPL11	0.00668555	-0.51486	1	1	1	CD8_ZNF683	RPL11
DDX27	0.00676267	0.869601	0.368	0.142	1	CD8_ZNF683	DDX27
LINC01138	0.00680577	0.675056	0.526	0.231	1	CD8_ZNF683	LINC01138
PREX1	0.00681189	0.747215	0.474	0.214	1	CD8_ZNF683	PREX1
CHCHD10	0.00690731	0.541235	0.632	0.299	1	CD8_ZNF683	CHCHD10
TMEM223	0.00699082	0.567163	0.263	0.078	1	CD8_ZNF683	TMEM223
ELOVL1	0.00701647	0.519022	0.316	0.103	1	CD8_ZNF683	ELOVL1
MRPS30	0.00703591	0.518836	0.368	0.128	1	CD8_ZNF683	MRPS30
ZFP91	0.00708732	0.483065	0.211	0.053	1	CD8_ZNF683	ZFP91
MUS81	0.00708732	0.47701	0.211	0.053	1	CD8_ZNF683	MUS81
PANK2	0.00712041	0.500878	0.316	0.103	1	CD8_ZNF683	PANK2
PDHA1.1	0.00717887	0.663941	0.316	0.114	1	CD8_ZNF683	PDHA1
ZNF480	0.00718199	0.502055	0.158	0.032	1	CD8_ZNF683	ZNF480
CEP44	0.00718199	0.471449	0.158	0.032	1	CD8_ZNF683	CEP44
RPS9	0.0072552	-0.594543	0.947	0.957	1	CD8_ZNF683	RPS9
TBCD.1	0.00725843	0.588388	0.316	0.107	1	CD8_ZNF683	TBCD
SUPT3H	0.00731141	0.540092	0.368	0.132	1	CD8_ZNF683	SUPT3H
CBWD2	0.00734538	0.574671	0.263	0.078	1	CD8_ZNF683	CBWD2
DCTPP1	0.00743398	0.454179	0.263	0.075	1	CD8_ZNF683	DCTPP1
SLC39A1	0.00744171	0.712912	0.211	0.057	1	CD8_ZNF683	SLC39A1
FBXW2.1	0.0074671	0.552607	0.263	0.078	1	CD8_ZNF683	FBXW2
C2orf49	0.00753583	0.471032	0.158	0.032	1	CD8_ZNF683	C2orf49
TICAM1	0.00753583	0.428819	0.158	0.032	1	CD8_ZNF683	TICAM1
SPTBN1	0.00759702	0.530249	0.263	0.082	1	CD8_ZNF683	SPTBN1
PML	0.00769618	0.685893	0.368	0.142	1	CD8_ZNF683	PML
DOCK5	0.00771855	0.514654	0.158	0.032	1	CD8_ZNF683	DOCK5
AL035530.2	0.00771855	0.424425	0.158	0.032	1	CD8_ZNF683	AL035530.2
MESD	0.00780154	0.532172	0.316	0.107	1	CD8_ZNF683	MESD
PPP1R37	0.00790523	0.457105	0.158	0.032	1	CD8_ZNF683	PPP1R37
BCL2L11.1	0.00792314	0.71972	0.316	0.114	1	CD8_ZNF683	BCL2L11
SH3BP1	0.00797096	0.755319	0.368	0.149	1	CD8_ZNF683	SH3BP1
DUT	0.00837075	0.753206	0.526	0.256	1	CD8_ZNF683	DUT
ARHGEF7.1	0.00838079	0.520124	0.316	0.107	1	CD8_ZNF683	ARHGEF7
ACTG1	0.00842443	0.417183	0.947	0.936	1	CD8_ZNF683	ACTG1
ZFP36L2	0.00859428	0.724293	1	0.858	1	CD8_ZNF683	ZFP36L2
PSMC5	0.00871994	0.646444	0.526	0.267	1	CD8_ZNF683	PSMC5
TUBGCP2	0.00877389	0.556752	0.263	0.082	1	CD8_ZNF683	TUBGCP2
DDX3X	0.00884571	0.654649	0.632	0.359	1	CD8_ZNF683	DDX3X
TRGV3	0.00896973	0.748457	0.211	0.057	1	CD8_ZNF683	TRGV3
C9orf78	0.00910255	0.749378	0.579	0.367	1	CD8_ZNF683	C9orf78
MLST8	0.00913698	0.40982	0.211	0.057	1	CD8_ZNF683	MLST8
SRSF9	0.00930534	0.488821	0.684	0.338	1	CD8_ZNF683	SRSF9
ZNF609	0.00934735	0.493828	0.263	0.082	1	CD8_ZNF683	ZNF609
CORO1A	0.00948225	0.40648	0.947	0.822	1	CD8_ZNF683	CORO1A
UQCRB	0.00948393	-0.841493	0.684	0.769	1	CD8_ZNF683	UQCRB
CCL4.1	0.00963225	0.529844	0.789	0.448	1	CD8_ZNF683	CCL4
CAPN12	0.00965555	0.448005	0.211	0.057	1	CD8_ZNF683	CAPN12
CASP1	0.00970856	0.549396	0.474	0.203	1	CD8_ZNF683	CASP1
MIA3	0.00975506	0.611263	0.316	0.114	1	CD8_ZNF683	MIA3
CLEC2B	0.00979542	0.522704	0.895	0.512	1	CD8_ZNF683	CLEC2B
MED1	0.00983415	0.504056	0.211	0.057	1	CD8_ZNF683	MED1
SPRY1	1.2208e-10	1.60126	0.526	0.13	4.01533e-06	CD8_GZMB	SPRY1
CD8A.1	1.78904e-10	1.2541	0.868	0.321	5.88434e-06	CD8_GZMB	CD8A
XCL1	1.51586e-09	2.26966	0.395	0.073	4.98581e-05	CD8_GZMB	XCL1
XCL2.2	2.70048e-08	1.46901	0.553	0.156	0.000888214	CD8_GZMB	XCL2
GZMB.2	1.78834e-07	0.70947	0.816	0.324	0.00588202	CD8_GZMB	GZMB
TRBV4-2	1.42581e-06	1.84156	0.184	0.019	0.0468962	CD8_GZMB	TRBV4-2
ANXA1	2.10823e-06	0.526353	0.921	0.492	0.0693418	CD8_GZMB	ANXA1
CD8B.1	2.63799e-06	1.17764	0.632	0.263	0.086766	CD8_GZMB	CD8B
ZFP36L2.1	5.24207e-06	0.94843	0.947	0.855	0.172417	CD8_GZMB	ZFP36L2
VIM	8.21926e-06	0.80858	0.947	0.782	0.27034	CD8_GZMB	VIM
CCL5.2	1.15981e-05	0.646205	0.974	0.515	0.381474	CD8_GZMB	CCL5
CCL4.2	1.20855e-05	0.878742	0.816	0.42	0.397505	CD8_GZMB	CCL4
PSMD11	1.68046e-05	0.75772	0.421	0.145	0.552721	CD8_GZMB	PSMD11
CD55	4.7616e-05	0.965462	0.605	0.317	1	CD8_GZMB	CD55
S100A6	6.06164e-05	0.600062	0.974	0.828	1	CD8_GZMB	S100A6
PLCB1	6.25483e-05	0.702535	0.211	0.042	1	CD8_GZMB	PLCB1
MRPL21	6.30198e-05	0.654916	0.316	0.092	1	CD8_GZMB	MRPL21
GNAI3	6.59738e-05	0.802832	0.342	0.111	1	CD8_GZMB	GNAI3
BIN2.1	8.66738e-05	0.674522	0.526	0.229	1	CD8_GZMB	BIN2
MT-ND4	8.75263e-05	0.568051	0.974	0.863	1	CD8_GZMB	MT-ND4
NECAP1	9.01627e-05	0.739989	0.263	0.069	1	CD8_GZMB	NECAP1
ROCK2	9.20751e-05	0.553361	0.132	0.015	1	CD8_GZMB	ROCK2
MT-CO3	0.000114261	0.4415	0.974	0.973	1	CD8_GZMB	MT-CO3
KLRC1.2	0.000145618	1.28235	0.342	0.118	1	CD8_GZMB	KLRC1
CDK12	0.000153896	0.640867	0.368	0.126	1	CD8_GZMB	CDK12
PTGER2	0.000173445	0.72966	0.342	0.111	1	CD8_GZMB	PTGER2
SH3BGRL3.1	0.00025875	0.537659	1	0.927	1	CD8_GZMB	SH3BGRL3
ITPA	0.000277039	0.562118	0.395	0.149	1	CD8_GZMB	ITPA
ZNF428	0.000298756	0.719594	0.474	0.198	1	CD8_GZMB	ZNF428
KIAA0907	0.000336852	0.487419	0.105	0.011	1	CD8_GZMB	KIAA0907
SNX10	0.000367031	0.588333	0.211	0.05	1	CD8_GZMB	SNX10
CD3G.2	0.000418856	0.525273	0.868	0.599	1	CD8_GZMB	CD3G
MT-ND2	0.000419956	0.635477	1	0.859	1	CD8_GZMB	MT-ND2
CCDC84	0.000453257	0.525833	0.158	0.031	1	CD8_GZMB	CCDC84
NFKBID	0.000538038	0.471417	0.237	0.065	1	CD8_GZMB	NFKBID
CAAP1	0.000556879	0.463407	0.184	0.042	1	CD8_GZMB	CAAP1
CACYBP	0.000576007	-1.2187	0.316	0.595	1	CD8_GZMB	CACYBP
CAPG.1	0.000585318	0.810329	0.526	0.263	1	CD8_GZMB	CAPG
JAML	0.000591271	0.645908	0.342	0.122	1	CD8_GZMB	JAML
ETFA	0.000616553	0.662176	0.368	0.149	1	CD8_GZMB	ETFA
MT-CO2.2	0.000638178	0.408421	1	1	1	CD8_GZMB	MT-CO2
FAM46C	0.000783173	0.511854	0.132	0.023	1	CD8_GZMB	FAM46C
IL7R.2	0.000805183	0.657008	0.816	0.573	1	CD8_GZMB	IL7R
ITGAE	0.000860821	0.436705	0.605	0.321	1	CD8_GZMB	ITGAE
CCDC14	0.000867824	0.547736	0.158	0.034	1	CD8_GZMB	CCDC14
L3MBTL2	0.00091429	0.452439	0.132	0.023	1	CD8_GZMB	L3MBTL2
TAP2-1	0.000934601	0.540246	0.132	0.023	1	CD8_GZMB	TAP2-1
ARMC10	0.000941424	0.495649	0.237	0.069	1	CD8_GZMB	ARMC10
SAR1A	0.00101472	0.610465	0.289	0.103	1	CD8_GZMB	SAR1A
NDUFAB1	0.00107388	0.637124	0.421	0.195	1	CD8_GZMB	NDUFAB1
DNAJC15	0.00113116	0.604122	0.447	0.218	1	CD8_GZMB	DNAJC15
ACADVL	0.00113556	0.744901	0.421	0.202	1	CD8_GZMB	ACADVL
SEC31B	0.0011764	0.441373	0.105	0.015	1	CD8_GZMB	SEC31B
UFM1	0.00125846	0.660267	0.368	0.16	1	CD8_GZMB	UFM1
HSPE1	0.00129784	-1.67856	0.447	0.687	1	CD8_GZMB	HSPE1
CMC2	0.00134198	0.637629	0.447	0.221	1	CD8_GZMB	CMC2
MYL12B	0.00137141	0.502987	0.868	0.809	1	CD8_GZMB	MYL12B
HSPH1	0.00138856	-2.04991	0.237	0.462	1	CD8_GZMB	HSPH1
TRBV30	0.00140147	1.16231	0.105	0.015	1	CD8_GZMB	TRBV30
CRIP1	0.00146886	0.442124	1	0.725	1	CD8_GZMB	CRIP1
FKBP11	0.00153538	0.725466	0.447	0.237	1	CD8_GZMB	FKBP11
CEMIP2.1	0.00169353	-1.0476	0.132	0.385	1	CD8_GZMB	CEMIP2
CCDC71L	0.00170263	0.558572	0.184	0.05	1	CD8_GZMB	CCDC71L
MYL12A	0.00183256	0.457977	0.947	0.859	1	CD8_GZMB	MYL12A
HSPA1A	0.00183478	-1.99549	0.316	0.546	1	CD8_GZMB	HSPA1A
MSH3	0.00185608	0.4613	0.211	0.065	1	CD8_GZMB	MSH3
ARL4C	0.00193131	0.700136	0.763	0.531	1	CD8_GZMB	ARL4C
ANKRD28	0.00193379	0.568562	0.368	0.164	1	CD8_GZMB	ANKRD28
DHRS3	0.001961	0.528287	0.184	0.05	1	CD8_GZMB	DHRS3
DOK2	0.00197907	-1.26059	0.184	0.412	1	CD8_GZMB	DOK2
GPR68	0.00201169	0.479183	0.132	0.027	1	CD8_GZMB	GPR68
SIRPG	0.00215957	-0.997802	0.053	0.279	1	CD8_GZMB	SIRPG
MTFP1.1	0.0022418	0.481811	0.289	0.107	1	CD8_GZMB	MTFP1
MT-ND5.1	0.00226612	0.495499	0.921	0.74	1	CD8_GZMB	MT-ND5
RAB7A	0.00246223	0.55276	0.5	0.26	1	CD8_GZMB	RAB7A
ZNF101	0.00248902	0.480979	0.211	0.065	1	CD8_GZMB	ZNF101
PSMD14	0.00250594	0.48279	0.263	0.099	1	CD8_GZMB	PSMD14
TMA7	0.00253754	0.407421	0.974	0.874	1	CD8_GZMB	TMA7
MRPL3	0.00274944	0.569522	0.289	0.115	1	CD8_GZMB	MRPL3
MTCO1P12	0.00315865	2.31225	0.368	0.206	1	CD8_GZMB	MTCO1P12
KLRD1.3	0.00320633	0.602164	0.5	0.248	1	CD8_GZMB	KLRD1
ZBTB38	0.00331397	-0.853996	0.211	0.454	1	CD8_GZMB	ZBTB38
CHST12	0.00342285	0.539649	0.395	0.179	1	CD8_GZMB	CHST12
BMPR2	0.00347869	0.413887	0.105	0.019	1	CD8_GZMB	BMPR2
CD99	0.00351255	0.410178	0.868	0.679	1	CD8_GZMB	CD99
KDM6B	0.00357143	0.421052	0.316	0.126	1	CD8_GZMB	KDM6B
NBL1	0.00357274	0.652561	0.211	0.069	1	CD8_GZMB	NBL1
ZNF350	0.00364771	0.429668	0.132	0.031	1	CD8_GZMB	ZNF350
ZNF131	0.00401025	0.454918	0.316	0.13	1	CD8_GZMB	ZNF131
CXCR4	0.00401538	0.714068	0.974	0.798	1	CD8_GZMB	CXCR4
HAUS2	0.00417441	0.543116	0.184	0.057	1	CD8_GZMB	HAUS2
ERLEC1	0.00426459	0.504282	0.316	0.134	1	CD8_GZMB	ERLEC1
EMB	0.00455106	0.576887	0.553	0.328	1	CD8_GZMB	EMB
IFITM2.1	0.00455411	0.427186	0.947	0.76	1	CD8_GZMB	IFITM2
HSPA1B	0.00461037	-1.14633	0.211	0.466	1	CD8_GZMB	HSPA1B
MT-ND1	0.0046565	0.48116	0.895	0.863	1	CD8_GZMB	MT-ND1
ARHGEF9	0.00480019	0.444596	0.237	0.084	1	CD8_GZMB	ARHGEF9
GYG1.1	0.00484554	0.649002	0.368	0.191	1	CD8_GZMB	GYG1
NGDN	0.00497258	0.510208	0.316	0.141	1	CD8_GZMB	NGDN
AC243829.1	0.0050537	0.530429	0.211	0.073	1	CD8_GZMB	AC243829.1
EIF1AX	0.00515813	0.8694	0.395	0.21	1	CD8_GZMB	EIF1AX
DNAJA1	0.00518707	-0.959617	0.474	0.653	1	CD8_GZMB	DNAJA1
TRADD	0.00521599	0.459559	0.395	0.187	1	CD8_GZMB	TRADD
RN7SL2	0.00530064	0.605403	0.158	0.046	1	CD8_GZMB	RN7SL2
SYAP1	0.00532468	-0.83498	0.079	0.286	1	CD8_GZMB	SYAP1
INTS8	0.0056276	0.496331	0.158	0.046	1	CD8_GZMB	INTS8
ZFP36	0.00563025	0.801919	0.974	0.84	1	CD8_GZMB	ZFP36
KATNAL1	0.00571214	0.523112	0.158	0.046	1	CD8_GZMB	KATNAL1
FKBP4	0.00634982	-1.34811	0.079	0.279	1	CD8_GZMB	FKBP4
C19orf24	0.00657801	0.465229	0.421	0.221	1	CD8_GZMB	C19orf24
C20orf24	0.00661214	0.65597	0.132	0.034	1	CD8_GZMB	C20orf24
NAXE	0.00681549	0.503155	0.289	0.126	1	CD8_GZMB	NAXE
CHFR	0.00683952	0.474991	0.184	0.061	1	CD8_GZMB	CHFR
RNF125	0.00684323	0.504232	0.316	0.137	1	CD8_GZMB	RNF125
TRGV10	0.00692935	0.650382	0.184	0.061	1	CD8_GZMB	TRGV10
ORAI2	0.00694759	0.479196	0.132	0.034	1	CD8_GZMB	ORAI2
C19orf10	0.00714548	0.574121	0.158	0.05	1	CD8_GZMB	C19orf10
METAP2	0.00714747	0.47814	0.316	0.145	1	CD8_GZMB	METAP2
CALR	0.0072297	0.462572	0.737	0.531	1	CD8_GZMB	CALR
ACTR3	0.00735521	0.475971	0.711	0.504	1	CD8_GZMB	ACTR3
LINC00667	0.00757228	0.430235	0.211	0.076	1	CD8_GZMB	LINC00667
CAMLG	0.0076825	0.533129	0.368	0.187	1	CD8_GZMB	CAMLG
HMOX2	0.00769792	0.542044	0.474	0.275	1	CD8_GZMB	HMOX2
SMDT1	0.00774707	0.578325	0.553	0.366	1	CD8_GZMB	SMDT1
NAP1L4	0.00778057	-0.685441	0.316	0.519	1	CD8_GZMB	NAP1L4
CD2	0.0081076	0.555271	0.868	0.767	1	CD8_GZMB	CD2
RPL18AP3	0.00817893	0.453723	0.132	0.034	1	CD8_GZMB	RPL18AP3
BIRC3	0.00838688	-0.906639	0.132	0.355	1	CD8_GZMB	BIRC3
ERC1	0.00846079	0.561882	0.158	0.05	1	CD8_GZMB	ERC1
MT-CYB	0.00850219	0.42551	1	0.969	1	CD8_GZMB	MT-CYB
ATP5B	0.00856992	0.608138	0.184	0.065	1	CD8_GZMB	ATP5B
EEF1A1P5	0.00884547	-0.882662	0.289	0.473	1	CD8_GZMB	EEF1A1P5
SSR4	0.00886256	0.465926	0.737	0.656	1	CD8_GZMB	SSR4
TNIK	0.0091033	-0.652459	0.026	0.202	1	CD8_GZMB	TNIK
TNFRSF4	0.00919823	-0.640288	0.053	0.244	1	CD8_GZMB	TNFRSF4
ID2	0.00952146	0.81473	0.553	0.347	1	CD8_GZMB	ID2
FKBP2	0.00968902	0.534318	0.342	0.172	1	CD8_GZMB	FKBP2
GZMK	3.79625e-16	2.72811	0.895	0.171	1.24863e-11	CD8_GZMK	GZMK
TNFSF9.1	3.60317e-09	1.51622	0.632	0.121	0.000118512	CD8_GZMK	TNFSF9
PLOD1	1.34188e-08	0.748396	0.158	0.004	0.000441358	CD8_GZMK	PLOD1
CCL4.3	1.88964e-08	2.15814	1	0.434	0.000621521	CD8_GZMK	CCL4
FANCB	5.38678e-08	0.594724	0.105	0	0.00177177	CD8_GZMK	FANCB
AC009403.2	5.38678e-08	0.568384	0.105	0	0.00177177	CD8_GZMK	AC009403.2
PP2D1	5.38678e-08	0.548446	0.105	0	0.00177177	CD8_GZMK	PP2D1
NXPH4	5.38678e-08	0.4348	0.105	0	0.00177177	CD8_GZMK	NXPH4
CCL4L2.2	2.66103e-07	2.64152	0.737	0.253	0.00875239	CD8_GZMK	CCL4L2
KLRG1	2.07895e-06	1.10602	0.421	0.085	0.0683788	CD8_GZMK	KLRG1
DUSP2.1	2.39974e-06	1.6294	0.947	0.626	0.0789299	CD8_GZMK	DUSP2
IGKV1-27	7.6947e-06	0.793734	0.158	0.011	0.253086	CD8_GZMK	IGKV1-27
TNRC6C-AS1	1.61201e-05	0.772806	0.105	0.004	0.530206	CD8_GZMK	TNRC6C-AS1
L3MBTL4.1	1.61201e-05	0.64014	0.105	0.004	0.530206	CD8_GZMK	L3MBTL4
EPHX1	1.61201e-05	0.548635	0.105	0.004	0.530206	CD8_GZMK	EPHX1
INAFM2	1.61201e-05	0.544022	0.105	0.004	0.530206	CD8_GZMK	INAFM2
AL158163.2	1.85983e-05	0.455157	0.105	0.004	0.611716	CD8_GZMK	AL158163.2
RPL39P3	1.85983e-05	0.431547	0.105	0.004	0.611716	CD8_GZMK	RPL39P3
GSTM4	2.17045e-05	0.850781	0.211	0.025	0.713882	CD8_GZMK	GSTM4
NKG7.2	2.1755e-05	0.996806	0.947	0.47	0.715545	CD8_GZMK	NKG7
ACTR10	4.25187e-05	0.995715	0.474	0.139	1	CD8_GZMK	ACTR10
LYAR	4.52506e-05	1.52813	0.421	0.121	1	CD8_GZMK	LYAR
GTF2IP20	5.4912e-05	0.763866	0.158	0.014	1	CD8_GZMK	GTF2IP20
AP002748.3	5.74073e-05	0.673839	0.158	0.014	1	CD8_GZMK	AP002748.3
SHISAL2A	5.81103e-05	1.0672	0.211	0.028	1	CD8_GZMK	SHISAL2A
CST7.2	6.61277e-05	1.24337	0.947	0.527	1	CD8_GZMK	CST7
SLC15A4	6.79468e-05	1.1429	0.263	0.046	1	CD8_GZMK	SLC15A4
TMEM39A	0.000114398	0.883127	0.263	0.05	1	CD8_GZMK	TMEM39A
CDKN3	0.000151968	0.981603	0.211	0.032	1	CD8_GZMK	CDKN3
DGKZ.1	0.000159197	1.04472	0.474	0.164	1	CD8_GZMK	DGKZ
CCL3L1.1	0.000165929	1.2685	0.316	0.071	1	CD8_GZMK	CCL3L1
HEMK1	0.000191067	0.834481	0.158	0.018	1	CD8_GZMK	HEMK1
CCL5.3	0.000267518	0.666351	1	0.544	1	CD8_GZMK	CCL5
MYO15B	0.000289707	0.537757	0.105	0.007	1	CD8_GZMK	MYO15B
LINC02325	0.000289707	0.515083	0.105	0.007	1	CD8_GZMK	LINC02325
SUV39H2	0.000289707	0.513616	0.105	0.007	1	CD8_GZMK	SUV39H2
FSD1L	0.000289707	0.512499	0.105	0.007	1	CD8_GZMK	FSD1L
NFYC-AS1	0.000289707	0.485591	0.105	0.007	1	CD8_GZMK	NFYC-AS1
MT1M	0.000289707	0.456333	0.105	0.007	1	CD8_GZMK	MT1M
UQCC1	0.000289707	0.456138	0.105	0.007	1	CD8_GZMK	UQCC1
AC245100.4	0.000289707	0.455966	0.105	0.007	1	CD8_GZMK	AC245100.4
FTH1	0.000300065	-1.06092	0.947	0.993	1	CD8_GZMK	FTH1
WRN	0.000305514	0.442692	0.105	0.007	1	CD8_GZMK	WRN
ABHD12	0.000386152	0.857072	0.316	0.078	1	CD8_GZMK	ABHD12
CHCHD2	0.000399009	0.808026	0.947	0.765	1	CD8_GZMK	CHCHD2
PMS2P1	0.000429232	0.850946	0.263	0.057	1	CD8_GZMK	PMS2P1
SFI1	0.000436536	0.97119	0.316	0.085	1	CD8_GZMK	SFI1
MYC	0.000482052	0.827793	0.263	0.057	1	CD8_GZMK	MYC
PPP1R14B	0.000675909	1.7878	0.421	0.157	1	CD8_GZMK	PPP1R14B
CYB561D2	0.000774684	0.915792	0.421	0.149	1	CD8_GZMK	CYB561D2
CD8B.2	0.000804135	0.805566	0.684	0.285	1	CD8_GZMK	CD8B
RARRES3	0.000822945	0.871758	0.895	0.669	1	CD8_GZMK	RARRES3
PYHIN1	0.00103314	0.973445	0.526	0.249	1	CD8_GZMK	PYHIN1
RORA	0.00111044	-1.58	0.105	0.509	1	CD8_GZMK	RORA
KLRB1	0.0011612	-2.06177	0.053	0.456	1	CD8_GZMK	KLRB1
UGP2	0.00128197	-1.3938	0	0.377	1	CD8_GZMK	UGP2
IGHV2-5	0.00142381	0.788789	0.158	0.025	1	CD8_GZMK	IGHV2-5
AGO3	0.00145694	0.784748	0.263	0.068	1	CD8_GZMK	AGO3
THEMIS	0.00154187	1.53833	0.474	0.224	1	CD8_GZMK	THEMIS
STK11IP	0.00167574	0.529403	0.105	0.011	1	CD8_GZMK	STK11IP
ZFP69	0.00167574	0.443544	0.105	0.011	1	CD8_GZMK	ZFP69
ZNF367	0.00174766	0.702722	0.105	0.011	1	CD8_GZMK	ZNF367
TPTE2P5	0.00182241	0.502018	0.105	0.011	1	CD8_GZMK	TPTE2P5
LCMT1-AS1	0.00182241	0.488321	0.105	0.011	1	CD8_GZMK	LCMT1-AS1
PCNX2	0.00192638	0.971808	0.263	0.071	1	CD8_GZMK	PCNX2
FCRL6	0.00209983	1.03305	0.211	0.046	1	CD8_GZMK	FCRL6
CTLA4	0.00211341	-1.79185	0.053	0.413	1	CD8_GZMK	CTLA4
LTB.1	0.00211392	-2.20302	0.158	0.509	1	CD8_GZMK	LTB
CCT3	0.00212778	-1.32429	0	0.352	1	CD8_GZMK	CCT3
BFAR	0.00220703	0.839791	0.316	0.1	1	CD8_GZMK	BFAR
ZNF7	0.00273444	0.903535	0.158	0.028	1	CD8_GZMK	ZNF7
GPR18	0.00278887	1.03554	0.316	0.11	1	CD8_GZMK	GPR18
ASH1L	0.00279743	1.07801	0.421	0.171	1	CD8_GZMK	ASH1L
TMEM99	0.00281065	0.755356	0.158	0.028	1	CD8_GZMK	TMEM99
AC020659.1.1	0.00296893	0.855417	0.158	0.028	1	CD8_GZMK	AC020659.1
CYCS	0.00304647	-0.938924	0.158	0.584	1	CD8_GZMK	CYCS
PLEKHM1P1	0.00305108	0.761022	0.158	0.028	1	CD8_GZMK	PLEKHM1P1
TMCC1	0.00316739	0.642987	0.211	0.05	1	CD8_GZMK	TMCC1
GADD45GIP1	0.0032344	-1.21028	0	0.331	1	CD8_GZMK	GADD45GIP1
YBX1	0.00339402	-0.916298	0.368	0.726	1	CD8_GZMK	YBX1
S100A11	0.00340125	-1.17446	0.316	0.698	1	CD8_GZMK	S100A11
AC243829.1.1	0.00346709	1.09224	0.263	0.078	1	CD8_GZMK	AC243829.1
SEC24A	0.00349378	0.618595	0.158	0.028	1	CD8_GZMK	SEC24A
CEMIP2.2	0.00354479	0.698591	0.632	0.335	1	CD8_GZMK	CEMIP2
DDIT4	0.00360905	-0.816652	0.211	0.662	1	CD8_GZMK	DDIT4
ITM2C	0.00370671	1.32094	0.421	0.181	1	CD8_GZMK	ITM2C
DDX3X.1	0.00383949	-1.19142	0.053	0.399	1	CD8_GZMK	DDX3X
MCL1	0.00396804	-1.20205	0.316	0.665	1	CD8_GZMK	MCL1
IFNG	0.00423366	2.31115	0.368	0.146	1	CD8_GZMK	IFNG
NSUN2	0.004627	1.05144	0.263	0.082	1	CD8_GZMK	NSUN2
CACYBP.1	0.00478319	-1.35722	0.211	0.584	1	CD8_GZMK	CACYBP
SERPINB6.1	0.00478613	0.883378	0.263	0.082	1	CD8_GZMK	SERPINB6
RNASET2	0.00484543	-1.16012	0.053	0.384	1	CD8_GZMK	RNASET2
TNFRSF10A	0.00509495	0.621847	0.158	0.032	1	CD8_GZMK	TNFRSF10A
PRPF40A	0.00518249	-1.0889	0	0.306	1	CD8_GZMK	PRPF40A
GZMH.2	0.0051973	1.07812	0.579	0.285	1	CD8_GZMK	GZMH
TRIOBP	0.00522346	0.684808	0.158	0.032	1	CD8_GZMK	TRIOBP
ZNF76	0.00526823	1.04869	0.211	0.057	1	CD8_GZMK	ZNF76
AC010642.2	0.0053549	0.687083	0.158	0.032	1	CD8_GZMK	AC010642.2
IFNG-AS1	0.00547568	0.918559	0.105	0.014	1	CD8_GZMK	IFNG-AS1
EEF1AKMT1	0.00547568	0.735914	0.105	0.014	1	CD8_GZMK	EEF1AKMT1
PSTK	0.00547568	0.628003	0.105	0.014	1	CD8_GZMK	PSTK
REEP6	0.00547568	0.611012	0.105	0.014	1	CD8_GZMK	REEP6
UCK2	0.00547568	0.522021	0.105	0.014	1	CD8_GZMK	UCK2
TRMT10A	0.00547568	0.519274	0.105	0.014	1	CD8_GZMK	TRMT10A
HIST4H4	0.00547568	0.518013	0.105	0.014	1	CD8_GZMK	HIST4H4
FKTN	0.00547568	0.440851	0.105	0.014	1	CD8_GZMK	FKTN
AL035530.2.1	0.00548932	0.66119	0.158	0.032	1	CD8_GZMK	AL035530.2
FAM193B	0.00548932	0.594283	0.158	0.032	1	CD8_GZMK	FAM193B
COPS6	0.00553555	-1.09035	0	0.302	1	CD8_GZMK	COPS6
EFHC1	0.00566855	0.431144	0.105	0.014	1	CD8_GZMK	EFHC1
ALG11	0.00576733	0.978055	0.158	0.032	1	CD8_GZMK	ALG11
FAM19A2	0.00586752	0.631409	0.105	0.014	1	CD8_GZMK	FAM19A2
PLEKHG1	0.00586752	0.579119	0.105	0.014	1	CD8_GZMK	PLEKHG1
UBE2T	0.00586752	0.458301	0.105	0.014	1	CD8_GZMK	UBE2T
FASTKD1	0.00586752	0.447899	0.105	0.014	1	CD8_GZMK	FASTKD1
PKM	0.00589728	-1.22421	0.158	0.509	1	CD8_GZMK	PKM
IRF2BPL	0.00604593	0.68267	0.263	0.082	1	CD8_GZMK	IRF2BPL
TBC1D19	0.00605797	0.546635	0.158	0.032	1	CD8_GZMK	TBC1D19
ZNF780B	0.00605797	0.544042	0.158	0.032	1	CD8_GZMK	ZNF780B
TRBV7-9	0.00607277	1.69738	0.105	0.014	1	CD8_GZMK	TRBV7-9
ARL4D	0.00607277	0.462227	0.105	0.014	1	CD8_GZMK	ARL4D
FBXW9	0.00607277	0.441467	0.105	0.014	1	CD8_GZMK	FBXW9
AL138963.3	0.00607277	0.430988	0.105	0.014	1	CD8_GZMK	AL138963.3
DCAF10	0.00620818	0.55087	0.158	0.032	1	CD8_GZMK	DCAF10
WRAP53	0.00628446	0.40873	0.105	0.014	1	CD8_GZMK	WRAP53
C1orf52	0.0063704	0.681183	0.368	0.153	1	CD8_GZMK	C1orf52
RPL7	0.00640226	-1.63692	0.368	0.733	1	CD8_GZMK	RPL7
TRBV6-2	0.00672789	1.2505	0.105	0.014	1	CD8_GZMK	TRBV6-2
ATP1B3.1	0.00718031	-1.23926	0	0.288	1	CD8_GZMK	ATP1B3
EIF3L	0.00729665	-1.03351	0.105	0.448	1	CD8_GZMK	EIF3L
ARHGAP26	0.00759702	0.601192	0.263	0.082	1	CD8_GZMK	ARHGAP26
VPS37B.1	0.00765635	-1.20519	0	0.285	1	CD8_GZMK	VPS37B
AC044849.1	0.00775183	0.964325	0.211	0.06	1	CD8_GZMK	AC044849.1
MPHOSPH8	0.00786889	-0.63969	0.053	0.388	1	CD8_GZMK	MPHOSPH8
PRPF38B	0.00789344	-1.00854	0.053	0.37	1	CD8_GZMK	PRPF38B
PTPRJ	0.00809406	0.844285	0.421	0.196	1	CD8_GZMK	PTPRJ
FAM102A	0.00811283	0.9185	0.368	0.164	1	CD8_GZMK	FAM102A
TNF	0.00835058	0.838506	0.368	0.146	1	CD8_GZMK	TNF
AP1G1	0.00884017	0.702514	0.158	0.036	1	CD8_GZMK	AP1G1
PTMA	0.00888433	-0.490671	1	0.993	1	CD8_GZMK	PTMA
TAF7	0.00894713	-1.12309	0.053	0.356	1	CD8_GZMK	TAF7
MUC6	0.0090429	0.655934	0.158	0.036	1	CD8_GZMK	MUC6
ACTR2	0.0094614	-0.974221	0.105	0.431	1	CD8_GZMK	ACTR2
RNF2	0.00967623	0.733424	0.158	0.036	1	CD8_GZMK	RNF2
TRRAP	0.00967623	0.560081	0.158	0.036	1	CD8_GZMK	TRRAP
SH2B3.1	0.00967623	0.551972	0.158	0.036	1	CD8_GZMK	SH2B3
SF1	0.00972602	-0.786897	0.211	0.573	1	CD8_GZMK	SF1
PSMD13	0.009865	-0.886164	0	0.27	1	CD8_GZMK	PSMD13
CD27.1	0.00994867	0.744561	0.579	0.342	1	CD8_GZMK	CD27
NKG7.3	9.86805e-14	2.20544	0.969	0.444	3.2457e-09	CD8_CXCL13	NKG7
HAVCR2	4.64789e-13	1.49634	0.438	0.052	1.52874e-08	CD8_CXCL13	HAVCR2
GZMH.3	1.57594e-11	1.83542	0.781	0.246	5.18342e-07	CD8_CXCL13	GZMH
CD38.1	1.90547e-11	1.22706	0.5	0.086	6.26728e-07	CD8_CXCL13	CD38
GZMA.2	3.94587e-11	1.74272	0.938	0.437	1.29784e-06	CD8_CXCL13	GZMA
GZMB.3	7.92516e-11	2.50186	0.844	0.332	2.60666e-06	CD8_CXCL13	GZMB
FABP5	1.25182e-10	1.9475	0.594	0.149	4.11737e-06	CD8_CXCL13	FABP5
AFAP1L2	1.47022e-10	0.949391	0.281	0.022	4.83568e-06	CD8_CXCL13	AFAP1L2
CD8A.2	1.89303e-10	1.39543	0.875	0.332	6.22635e-06	CD8_CXCL13	CD8A
CXCL13	1.37286e-09	1.20206	0.344	0.041	4.51548e-05	CD8_CXCL13	CXCL13
HLA-DRB1.2	2.34766e-09	1.60393	0.844	0.34	7.72168e-05	CD8_CXCL13	HLA-DRB1
HLA-DPA1.1	2.47247e-09	1.36034	0.844	0.373	8.13221e-05	CD8_CXCL13	HLA-DPA1
CD27.2	2.57514e-09	1.38951	0.781	0.306	8.46988e-05	CD8_CXCL13	CD27
BMF	3.03984e-09	0.623216	0.188	0.007	9.99833e-05	CD8_CXCL13	BMF
CCL5.4	3.68635e-09	1.39994	0.938	0.53	0.000121248	CD8_CXCL13	CCL5
IL7R.3	4.70482e-09	-3.35082	0.094	0.664	0.000154746	CD8_CXCL13	IL7R
KLRC4	4.76417e-09	0.974728	0.25	0.022	0.000156698	CD8_CXCL13	KLRC4
CD86	6.18841e-09	0.539601	0.125	0	0.000203543	CD8_CXCL13	CD86
CENPP	6.18841e-09	0.425198	0.125	0	0.000203543	CD8_CXCL13	CENPP
CD8B.3	6.51487e-09	1.37331	0.75	0.257	0.000214281	CD8_CXCL13	CD8B
TNFRSF9	1.58708e-08	1.19983	0.375	0.063	0.000522008	CD8_CXCL13	TNFRSF9
METRNL.1	1.65054e-08	1.21592	0.531	0.131	0.00054288	CD8_CXCL13	METRNL
KLRD1.4	1.88196e-08	1.32523	0.688	0.231	0.000618997	CD8_CXCL13	KLRD1
PRF1.3	3.84498e-08	1.81178	0.75	0.343	0.00126465	CD8_CXCL13	PRF1
MBD5	5.02619e-08	0.839339	0.312	0.045	0.00165317	CD8_CXCL13	MBD5
CARS	5.68804e-08	0.902113	0.406	0.082	0.00187085	CD8_CXCL13	CARS
PDXP	1.46974e-07	0.485669	0.156	0.007	0.00483412	CD8_CXCL13	PDXP
KIR2DL4.2	1.77781e-07	1.38221	0.375	0.075	0.0058474	CD8_CXCL13	KIR2DL4
BST2	1.96263e-07	1.28175	0.75	0.343	0.00645528	CD8_CXCL13	BST2
EEF1A1.1	2.69908e-07	-0.943363	1	0.996	0.00887755	CD8_CXCL13	EEF1A1
VCAM1	3.85762e-07	0.882503	0.219	0.022	0.0126881	CD8_CXCL13	VCAM1
FAM3C.1	5.88558e-07	1.40184	0.438	0.127	0.0193583	CD8_CXCL13	FAM3C
AC243829.4.1	6.71879e-07	0.877582	0.25	0.034	0.0220988	CD8_CXCL13	AC243829.4
ANXA5	1.09829e-06	1.18079	0.625	0.269	0.036124	CD8_CXCL13	ANXA5
VPS37B.2	1.24463e-06	1.01483	0.594	0.228	0.0409373	CD8_CXCL13	VPS37B
CRTAM.1	1.45557e-06	0.986163	0.375	0.086	0.047875	CD8_CXCL13	CRTAM
PON2	1.48624e-06	0.595898	0.156	0.011	0.048884	CD8_CXCL13	PON2
TRAV14DV4	1.802e-06	0.792638	0.156	0.011	0.0592697	CD8_CXCL13	TRAV14DV4
LYST	2.26876e-06	1.44258	0.562	0.231	0.0746218	CD8_CXCL13	LYST
ENTPD1	2.88481e-06	1.23546	0.375	0.093	0.0948843	CD8_CXCL13	ENTPD1
SIK2	3.91611e-06	0.605378	0.219	0.03	0.128805	CD8_CXCL13	SIK2
RPUSD3.1	4.15546e-06	0.751739	0.312	0.067	0.136677	CD8_CXCL13	RPUSD3
LAG3.1	4.29699e-06	2.06111	0.594	0.265	0.141332	CD8_CXCL13	LAG3
FOS	4.68376e-06	-2.56398	0.344	0.687	0.154054	CD8_CXCL13	FOS
CDK2AP2	4.93379e-06	1.10113	0.625	0.265	0.162277	CD8_CXCL13	CDK2AP2
GAPDH	5.78946e-06	0.867686	1	0.922	0.190421	CD8_CXCL13	GAPDH
TNIP3	6.48926e-06	0.879152	0.281	0.056	0.213438	CD8_CXCL13	TNIP3
CD81.1	6.54824e-06	1.03926	0.844	0.511	0.215378	CD8_CXCL13	CD81
IDH2	6.9893e-06	1.09372	0.625	0.299	0.229885	CD8_CXCL13	IDH2
RPL32	7.45255e-06	-0.761992	1	0.996	0.245122	CD8_CXCL13	RPL32
HCST.1	8.36855e-06	0.977559	0.875	0.705	0.27525	CD8_CXCL13	HCST
IFITM10	8.59143e-06	0.408635	0.125	0.007	0.282581	CD8_CXCL13	IFITM10
UVSSA	9.01011e-06	0.523402	0.156	0.015	0.296351	CD8_CXCL13	UVSSA
AKAP5	9.68024e-06	0.710038	0.219	0.034	0.318393	CD8_CXCL13	AKAP5
ADGRG5	1.06676e-05	0.560428	0.156	0.015	0.350867	CD8_CXCL13	ADGRG5
CLIC1.1	1.08702e-05	0.739324	0.938	0.72	0.357533	CD8_CXCL13	CLIC1
TPT1	1.16309e-05	-0.707667	0.969	0.993	0.382553	CD8_CXCL13	TPT1
PSMB9.1	1.17698e-05	1.09048	0.812	0.582	0.387119	CD8_CXCL13	PSMB9
SNAP47	1.19619e-05	1.07684	0.375	0.108	0.393437	CD8_CXCL13	SNAP47
RARRES3.1	1.30486e-05	0.936959	0.906	0.657	0.429182	CD8_CXCL13	RARRES3
TOX	1.32281e-05	0.900667	0.531	0.194	0.435086	CD8_CXCL13	TOX
P3H1	1.38875e-05	0.645505	0.25	0.045	0.456773	CD8_CXCL13	P3H1
TMEM214	1.5286e-05	0.510013	0.219	0.034	0.502772	CD8_CXCL13	TMEM214
G6PD	1.6676e-05	0.744874	0.312	0.075	0.548492	CD8_CXCL13	G6PD
DUSP4	1.91752e-05	1.08381	0.625	0.272	0.630693	CD8_CXCL13	DUSP4
CD63.2	2.19527e-05	0.995406	0.688	0.325	0.722047	CD8_CXCL13	CD63
CD7.2	2.27987e-05	0.955219	0.906	0.757	0.749872	CD8_CXCL13	CD7
RPS6	2.54433e-05	-0.975699	1	0.985	0.836854	CD8_CXCL13	RPS6
CXCR6	2.62885e-05	1.28767	0.562	0.239	0.864654	CD8_CXCL13	CXCR6
CEACAM21	2.7352e-05	0.785044	0.219	0.037	0.899635	CD8_CXCL13	CEACAM21
ATP5MC2	2.79599e-05	0.675763	0.938	0.649	0.919629	CD8_CXCL13	ATP5MC2
SH3BGRL3.2	2.85912e-05	0.767034	0.969	0.933	0.940394	CD8_CXCL13	SH3BGRL3
RPL11.1	3.21043e-05	-0.625175	1	1	1	CD8_CXCL13	RPL11
RPL34	3.27156e-05	-0.875764	1	0.993	1	CD8_CXCL13	RPL34
CD74.1	3.28884e-05	1.18989	0.969	0.799	1	CD8_CXCL13	CD74
BRF1	3.70202e-05	0.467205	0.156	0.019	1	CD8_CXCL13	BRF1
RIN3.1	4.71402e-05	0.716482	0.281	0.063	1	CD8_CXCL13	RIN3
HMOX1.1	4.7485e-05	1.22133	0.188	0.03	1	CD8_CXCL13	HMOX1
RPL3.1	4.92999e-05	-0.870804	0.938	0.966	1	CD8_CXCL13	RPL3
RPS8.1	4.97783e-05	-0.679574	1	0.996	1	CD8_CXCL13	RPS8
SLC23A2	4.99207e-05	0.435558	0.156	0.019	1	CD8_CXCL13	SLC23A2
RDH10	5.06705e-05	0.657249	0.125	0.011	1	CD8_CXCL13	RDH10
DUSP1	5.24878e-05	-1.21722	0.875	0.892	1	CD8_CXCL13	DUSP1
LTB.2	5.50265e-05	-1.9294	0.125	0.53	1	CD8_CXCL13	LTB
PDLIM4	6.03887e-05	0.448319	0.125	0.011	1	CD8_CXCL13	PDLIM4
SPOCK2.1	6.4213e-05	-1.32004	0.156	0.541	1	CD8_CXCL13	SPOCK2
CENPX	6.43452e-05	0.784632	0.375	0.119	1	CD8_CXCL13	CENPX
CCPG1	6.53935e-05	0.71513	0.344	0.101	1	CD8_CXCL13	CCPG1
EOMES.1	6.58009e-05	0.693911	0.188	0.03	1	CD8_CXCL13	EOMES
RPA3	7.08734e-05	0.696578	0.469	0.175	1	CD8_CXCL13	RPA3
CD3D.1	7.69421e-05	0.728536	0.969	0.825	1	CD8_CXCL13	CD3D
NCLN	8.49445e-05	0.648883	0.219	0.045	1	CD8_CXCL13	NCLN
HLA-DPB1.1	8.67263e-05	0.878321	0.688	0.332	1	CD8_CXCL13	HLA-DPB1
KLF6	9.16775e-05	-1.18647	0.656	0.847	1	CD8_CXCL13	KLF6
RPL35A	9.39277e-05	-0.595327	0.938	0.981	1	CD8_CXCL13	RPL35A
TAP1	9.87566e-05	0.880634	0.656	0.369	1	CD8_CXCL13	TAP1
HLA-DRA.1	9.99664e-05	1.03	0.5	0.201	1	CD8_CXCL13	HLA-DRA
TESC	0.000106117	0.672249	0.312	0.086	1	CD8_CXCL13	TESC
APOBEC3G	0.000108852	1.03249	0.531	0.239	1	CD8_CXCL13	APOBEC3G
ABI3	0.000115487	0.840542	0.562	0.25	1	CD8_CXCL13	ABI3
RPS3A	0.000128548	-0.796317	0.969	0.978	1	CD8_CXCL13	RPS3A
SLC9A1	0.000131248	0.472821	0.156	0.022	1	CD8_CXCL13	SLC9A1
PRKY	0.000132253	0.887546	0.188	0.034	1	CD8_CXCL13	PRKY
ANKRD35	0.000132253	0.684435	0.188	0.034	1	CD8_CXCL13	ANKRD35
PTMS	0.000142306	0.834018	0.469	0.187	1	CD8_CXCL13	PTMS
TARBP1	0.000150045	0.467888	0.156	0.022	1	CD8_CXCL13	TARBP1
CBLB	0.000150539	0.915548	0.812	0.47	1	CD8_CXCL13	CBLB
RPL8	0.000152381	-0.542158	1	0.993	1	CD8_CXCL13	RPL8
JPT1	0.000153495	0.769371	0.531	0.228	1	CD8_CXCL13	JPT1
MAP2K2	0.000154056	0.913749	0.625	0.291	1	CD8_CXCL13	MAP2K2
RFX5	0.000162697	0.539346	0.188	0.034	1	CD8_CXCL13	RFX5
STMN1	0.000165727	0.630839	0.344	0.108	1	CD8_CXCL13	STMN1
ATP8B4.2	0.00016961	0.653448	0.25	0.06	1	CD8_CXCL13	ATP8B4
VARS	0.000178246	0.49944	0.188	0.034	1	CD8_CXCL13	VARS
GPR183.1	0.000187201	-1.66691	0.094	0.429	1	CD8_CXCL13	GPR183
DTHD1	0.000199168	0.658575	0.344	0.101	1	CD8_CXCL13	DTHD1
TMEM107	0.000214864	0.580858	0.25	0.06	1	CD8_CXCL13	TMEM107
LSP1.1	0.000216435	0.774399	0.906	0.694	1	CD8_CXCL13	LSP1
SRRT	0.00021668	1.2422	0.469	0.216	1	CD8_CXCL13	SRRT
LAYN	0.000219965	0.753776	0.219	0.049	1	CD8_CXCL13	LAYN
BOD1	0.000228517	0.407225	0.188	0.034	1	CD8_CXCL13	BOD1
COTL1.1	0.000229974	1.02924	0.812	0.634	1	CD8_CXCL13	COTL1
FBXL6	0.000231436	0.707007	0.281	0.078	1	CD8_CXCL13	FBXL6
TRDV1	0.000232075	0.982726	0.125	0.015	1	CD8_CXCL13	TRDV1
WHRN	0.000233279	0.689924	0.219	0.049	1	CD8_CXCL13	WHRN
TIGIT	0.00024475	0.730882	0.625	0.299	1	CD8_CXCL13	TIGIT
CCDC9	0.000247347	0.566969	0.219	0.049	1	CD8_CXCL13	CCDC9
PIKFYVE	0.000249439	0.898148	0.188	0.037	1	CD8_CXCL13	PIKFYVE
RPS18	0.000250153	-0.739548	1	0.996	1	CD8_CXCL13	RPS18
PSMA2	0.000253245	0.798568	0.281	0.082	1	CD8_CXCL13	PSMA2
GFOD1.1	0.000257384	0.617649	0.25	0.063	1	CD8_CXCL13	GFOD1
ZEB2.1	0.000259693	0.986318	0.469	0.198	1	CD8_CXCL13	ZEB2
PSME2	0.000272031	0.889616	0.781	0.534	1	CD8_CXCL13	PSME2
PSMB8	0.000272237	0.728632	0.781	0.478	1	CD8_CXCL13	PSMB8
PGAM1	0.000276975	0.795712	0.531	0.246	1	CD8_CXCL13	PGAM1
MYO1E	0.000283326	0.5816	0.219	0.049	1	CD8_CXCL13	MYO1E
DMWD	0.000295213	0.424204	0.125	0.015	1	CD8_CXCL13	DMWD
RPL10A	0.000298275	-0.81283	0.938	0.914	1	CD8_CXCL13	RPL10A
IKZF3	0.000318652	0.801133	0.531	0.239	1	CD8_CXCL13	IKZF3
PSME1	0.000329839	0.636237	0.938	0.776	1	CD8_CXCL13	PSME1
DDX58	0.000358753	0.534819	0.188	0.037	1	CD8_CXCL13	DDX58
RPL39.1	0.000374352	-0.521956	1	0.993	1	CD8_CXCL13	RPL39
ARSA	0.000378374	0.589676	0.312	0.097	1	CD8_CXCL13	ARSA
VKORC1L1	0.000385231	0.452499	0.156	0.026	1	CD8_CXCL13	VKORC1L1
RPL38	0.000387131	-1.33963	0.531	0.713	1	CD8_CXCL13	RPL38
PSMB10	0.000393151	1.09628	0.656	0.373	1	CD8_CXCL13	PSMB10
CTSC	0.000404272	0.928521	0.719	0.433	1	CD8_CXCL13	CTSC
RNASEK	0.000415517	0.610715	0.781	0.481	1	CD8_CXCL13	RNASEK
PPM1A	0.000420756	0.5762	0.219	0.052	1	CD8_CXCL13	PPM1A
RPL9.1	0.000429787	-0.987312	0.844	0.918	1	CD8_CXCL13	RPL9
CCDC85C.1	0.000434408	0.474943	0.156	0.026	1	CD8_CXCL13	CCDC85C
TSPAN32	0.000434408	0.430363	0.156	0.026	1	CD8_CXCL13	TSPAN32
IRF2	0.000443712	0.742549	0.438	0.175	1	CD8_CXCL13	IRF2
CST7.3	0.000448974	1.15892	0.75	0.53	1	CD8_CXCL13	CST7
NBL1.1	0.000454858	0.617796	0.25	0.067	1	CD8_CXCL13	NBL1
RPS13	0.000460822	-0.538792	1	0.996	1	CD8_CXCL13	RPS13
SEM1	0.000471465	0.848961	0.625	0.328	1	CD8_CXCL13	SEM1
CALM3	0.000472994	0.807575	0.656	0.351	1	CD8_CXCL13	CALM3
RPL13.1	0.000475967	-0.522505	1	0.996	1	CD8_CXCL13	RPL13
SLA2.1	0.000502189	0.940427	0.375	0.149	1	CD8_CXCL13	SLA2
TFDP1	0.0005075	0.662433	0.281	0.086	1	CD8_CXCL13	TFDP1
SLC5A3	0.000510677	0.771619	0.25	0.067	1	CD8_CXCL13	SLC5A3
RPL10.1	0.000545666	-0.472227	1	1	1	CD8_CXCL13	RPL10
RPS2	0.000549955	-0.779675	0.938	0.974	1	CD8_CXCL13	RPS2
ARPC3	0.000578942	0.543635	0.906	0.72	1	CD8_CXCL13	ARPC3
AC022706.1	0.000583933	0.492822	0.219	0.052	1	CD8_CXCL13	AC022706.1
HMGB2.1	0.000597709	0.733911	0.75	0.481	1	CD8_CXCL13	HMGB2
CLEC2B.1	0.000599362	0.755226	0.781	0.507	1	CD8_CXCL13	CLEC2B
GSDMD	0.000644818	0.501068	0.438	0.172	1	CD8_CXCL13	GSDMD
CCL3.2	0.000648379	0.64108	0.312	0.101	1	CD8_CXCL13	CCL3
EIPR1	0.000665381	0.489488	0.188	0.041	1	CD8_CXCL13	EIPR1
OASL.1	0.000712367	0.827412	0.375	0.138	1	CD8_CXCL13	OASL
SLC2A8	0.00072031	0.538554	0.125	0.019	1	CD8_CXCL13	SLC2A8
PUF60	0.000751643	0.666691	0.531	0.254	1	CD8_CXCL13	PUF60
SUSD6.1	0.000766458	0.427748	0.25	0.067	1	CD8_CXCL13	SUSD6
CAMTA2	0.000766692	0.464483	0.156	0.03	1	CD8_CXCL13	CAMTA2
TARS2	0.000800721	0.444309	0.125	0.019	1	CD8_CXCL13	TARS2
MCRIP2	0.000824996	0.419706	0.188	0.041	1	CD8_CXCL13	MCRIP2
WDR25	0.00084398	0.464503	0.125	0.019	1	CD8_CXCL13	WDR25
COPB2	0.000889171	0.717355	0.375	0.142	1	CD8_CXCL13	COPB2
HLA-DRB5.1	0.000891058	0.913064	0.375	0.146	1	CD8_CXCL13	HLA-DRB5
SFXN4	0.000894499	0.509156	0.156	0.03	1	CD8_CXCL13	SFXN4
USP11	0.000907186	0.662451	0.344	0.134	1	CD8_CXCL13	USP11
GSTP1.2	0.000914273	0.560783	0.812	0.463	1	CD8_CXCL13	GSTP1
PARD6G	0.000934489	0.600145	0.156	0.03	1	CD8_CXCL13	PARD6G
EDARADD	0.000937072	0.450407	0.125	0.019	1	CD8_CXCL13	EDARADD
ATP5F1E	0.000967313	0.713047	0.969	0.716	1	CD8_CXCL13	ATP5F1E
RPL41P2.1	0.000988594	0.859296	0.375	0.153	1	CD8_CXCL13	RPL41P2
PLA2G16.1	0.00100194	0.904293	0.312	0.112	1	CD8_CXCL13	PLA2G16
RPL35	0.00100511	-0.75037	0.875	0.918	1	CD8_CXCL13	RPL35
GBP1	0.00100664	0.599004	0.344	0.127	1	CD8_CXCL13	GBP1
APIP	0.00101288	0.46869	0.219	0.056	1	CD8_CXCL13	APIP
GNAS	0.00101295	0.520827	0.969	0.709	1	CD8_CXCL13	GNAS
GOLGA2	0.00102611	0.659167	0.219	0.06	1	CD8_CXCL13	GOLGA2
NFKBIA	0.00111102	-0.976386	0.5	0.765	1	CD8_CXCL13	NFKBIA
ITM2C.1	0.00113586	0.759294	0.406	0.172	1	CD8_CXCL13	ITM2C
SDF2L1	0.00116161	0.913127	0.438	0.201	1	CD8_CXCL13	SDF2L1
ECI2	0.00119038	0.563411	0.344	0.123	1	CD8_CXCL13	ECI2
SLC7A5	0.00120648	0.728551	0.5	0.239	1	CD8_CXCL13	SLC7A5
UBE2L6	0.00122857	0.730076	0.562	0.299	1	CD8_CXCL13	UBE2L6
FKBP1A	0.00126167	0.850181	0.656	0.425	1	CD8_CXCL13	FKBP1A
RANGRF	0.00128544	0.51831	0.25	0.075	1	CD8_CXCL13	RANGRF
MCTP2.1	0.00129162	0.613025	0.219	0.06	1	CD8_CXCL13	MCTP2
DUSP23	0.00130472	0.479363	0.25	0.075	1	CD8_CXCL13	DUSP23
MAD2L2	0.00133303	0.682376	0.344	0.134	1	CD8_CXCL13	MAD2L2
ISG20	0.00133727	0.778605	0.812	0.634	1	CD8_CXCL13	ISG20
RPS27A	0.00136071	-0.448633	1	0.996	1	CD8_CXCL13	RPS27A
CYBA.1	0.00136216	0.577275	0.938	0.832	1	CD8_CXCL13	CYBA
OGA	0.00138531	0.630846	0.562	0.291	1	CD8_CXCL13	OGA
SLC25A46	0.00140089	0.528753	0.219	0.06	1	CD8_CXCL13	SLC25A46
TPI1	0.00140388	0.587247	0.844	0.59	1	CD8_CXCL13	TPI1
BANF1	0.00142331	0.689407	0.562	0.291	1	CD8_CXCL13	BANF1
FAM192A	0.00146889	0.477115	0.25	0.075	1	CD8_CXCL13	FAM192A
DDX5	0.00153191	-0.701191	0.906	0.907	1	CD8_CXCL13	DDX5
DNLZ	0.00154604	0.557438	0.312	0.112	1	CD8_CXCL13	DNLZ
ST6GALNAC6	0.00156823	0.475409	0.219	0.06	1	CD8_CXCL13	ST6GALNAC6
YTHDF3	0.00158095	0.474175	0.25	0.075	1	CD8_CXCL13	YTHDF3
PDE4D	0.00164339	0.425382	0.594	0.295	1	CD8_CXCL13	PDE4D
DPF2	0.00169394	0.585054	0.25	0.078	1	CD8_CXCL13	DPF2
CCDC28A	0.00172259	0.593003	0.312	0.116	1	CD8_CXCL13	CCDC28A
USPL1	0.00172612	0.44631	0.219	0.06	1	CD8_CXCL13	USPL1
RPS4X	0.00180282	-0.461133	1	0.989	1	CD8_CXCL13	RPS4X
STARD7	0.00181578	0.678573	0.406	0.175	1	CD8_CXCL13	STARD7
JUNB	0.00182465	-0.896364	0.844	0.881	1	CD8_CXCL13	JUNB
MTA2	0.00184362	0.484921	0.281	0.093	1	CD8_CXCL13	MTA2
AGGF1	0.00184572	0.540117	0.25	0.078	1	CD8_CXCL13	AGGF1
NFKBIZ	0.00185593	-1.15859	0.094	0.384	1	CD8_CXCL13	NFKBIZ
ACTB	0.00185634	0.571084	1	1	1	CD8_CXCL13	ACTB
TOGARAM1	0.00187342	0.742463	0.125	0.022	1	CD8_CXCL13	TOGARAM1
RAB5C	0.00187853	0.669004	0.469	0.235	1	CD8_CXCL13	RAB5C
ZNF444	0.00191787	0.455598	0.125	0.022	1	CD8_CXCL13	ZNF444
RPLP0	0.00198162	-0.667135	0.969	0.963	1	CD8_CXCL13	RPLP0
CADM1	0.00200968	0.687868	0.125	0.022	1	CD8_CXCL13	CADM1
ABCA7	0.00205708	0.538075	0.125	0.022	1	CD8_CXCL13	ABCA7
EXT2	0.00205708	0.495341	0.125	0.022	1	CD8_CXCL13	EXT2
PFN1.1	0.00207749	0.41565	1	0.966	1	CD8_CXCL13	PFN1
RPS29	0.00208242	-1.25543	0.781	0.877	1	CD8_CXCL13	RPS29
SSBP4	0.00209233	0.589805	0.562	0.284	1	CD8_CXCL13	SSBP4
TNFRSF1B	0.00210034	0.769128	0.531	0.302	1	CD8_CXCL13	TNFRSF1B
MALAT1	0.00213103	-1.00134	1	1	1	CD8_CXCL13	MALAT1
SMG5	0.00213566	0.472781	0.219	0.063	1	CD8_CXCL13	SMG5
ADORA2A	0.00215498	0.413541	0.125	0.022	1	CD8_CXCL13	ADORA2A
TATDN2	0.00216867	0.565384	0.219	0.063	1	CD8_CXCL13	TATDN2
TOR1A	0.00222339	0.569505	0.25	0.082	1	CD8_CXCL13	TOR1A
IGLV3-1.1	0.00224632	0.530889	0.281	0.093	1	CD8_CXCL13	IGLV3-1
PARVB	0.00224969	0.470797	0.25	0.078	1	CD8_CXCL13	PARVB
DLEU2	0.00227053	0.726943	0.219	0.063	1	CD8_CXCL13	DLEU2
IFITM2.2	0.00228664	0.820053	0.875	0.772	1	CD8_CXCL13	IFITM2
KLHDC7B	0.00230985	0.493412	0.125	0.022	1	CD8_CXCL13	KLHDC7B
TIMMDC1	0.00241258	0.432786	0.25	0.078	1	CD8_CXCL13	TIMMDC1
LGALS9	0.00241924	0.525658	0.281	0.101	1	CD8_CXCL13	LGALS9
FRAT2	0.00247791	0.472841	0.188	0.049	1	CD8_CXCL13	FRAT2
CAPZB	0.00249201	0.503666	0.844	0.619	1	CD8_CXCL13	CAPZB
IGLV6-57	0.00252009	0.773222	0.188	0.049	1	CD8_CXCL13	IGLV6-57
SPNS1	0.00252009	0.433037	0.188	0.049	1	CD8_CXCL13	SPNS1
CALHM2	0.00255058	0.46497	0.25	0.078	1	CD8_CXCL13	CALHM2
PTPRCAP	0.00262431	0.634862	0.938	0.851	1	CD8_CXCL13	PTPRCAP
NADSYN1	0.00264605	0.428534	0.312	0.116	1	CD8_CXCL13	NADSYN1
SH3BP2	0.0026486	0.602215	0.156	0.037	1	CD8_CXCL13	SH3BP2
ZBTB7A.1	0.00269341	0.693478	0.406	0.19	1	CD8_CXCL13	ZBTB7A
POGK	0.00270592	0.613636	0.188	0.052	1	CD8_CXCL13	POGK
IFITM1.1	0.00272164	0.884687	0.938	0.795	1	CD8_CXCL13	IFITM1
NAB1	0.00273323	0.474598	0.25	0.078	1	CD8_CXCL13	NAB1
FTH1.1	0.00275599	-0.642649	1	0.989	1	CD8_CXCL13	FTH1
DCTN3	0.00284743	0.469481	0.531	0.269	1	CD8_CXCL13	DCTN3
ATP5MC3.1	0.00290945	0.672432	0.656	0.429	1	CD8_CXCL13	ATP5MC3
ZNF428.1	0.00296391	0.541119	0.438	0.209	1	CD8_CXCL13	ZNF428
RAPGEF1	0.00301414	0.474698	0.375	0.157	1	CD8_CXCL13	RAPGEF1
ZAP70	0.00314519	0.599617	0.594	0.34	1	CD8_CXCL13	ZAP70
HIKESHI	0.00314661	0.466972	0.281	0.101	1	CD8_CXCL13	HIKESHI
ADGRE5	0.00317723	0.985408	0.625	0.373	1	CD8_CXCL13	ADGRE5
FERMT3	0.00333219	0.580165	0.5	0.276	1	CD8_CXCL13	FERMT3
DHRS1	0.00337211	0.419738	0.156	0.037	1	CD8_CXCL13	DHRS1
MIEN1	0.00345999	0.552323	0.469	0.228	1	CD8_CXCL13	MIEN1
MAPK13	0.00349817	0.458611	0.156	0.037	1	CD8_CXCL13	MAPK13
MLH1	0.00353312	0.474232	0.219	0.067	1	CD8_CXCL13	MLH1
ANAPC7	0.0035628	0.416941	0.156	0.037	1	CD8_CXCL13	ANAPC7
[truncated: 1,534 more rows]

## Sheet: Supplemental table S4
Supplementary Table S4, the top 30 DEGs of 8 B and plasma B cell subclusters
	p_val	avg_log2FC	pct.1	pct.2	p_val_adj	cluster	gene
STMN1	0	4.28117	1	0.082	0	gc_B_MKI67	STMN1
KIAA0101	0	3.13672	0.822	0.011	0	gc_B_MKI67	KIAA0101
PTTG1	0	2.7817	0.913	0.072	0	gc_B_MKI67	PTTG1
UBE2C	0	2.6833	0.78	0.01	0	gc_B_MKI67	UBE2C
RGS13	0	2.64239	0.886	0.031	0	gc_B_MKI67	RGS13
NUSAP1	0	2.36562	0.852	0.021	0	gc_B_MKI67	NUSAP1
HN1	0	2.36536	0.777	0.04	0	gc_B_MKI67	HN1
TK1	0	2.32324	0.818	0.015	0	gc_B_MKI67	TK1
TOP2A	0	2.26183	0.739	0.01	0	gc_B_MKI67	TOP2A
SMC4	0	2.23811	0.86	0.084	0	gc_B_MKI67	SMC4
RRM2	0	2.15192	0.739	0.008	0	gc_B_MKI67	RRM2
CENPF	0	2.12613	0.678	0.008	0	gc_B_MKI67	CENPF
MKI67	0	2.0986	0.811	0.01	0	gc_B_MKI67	MKI67
BIRC5	0	2.09018	0.792	0.007	0	gc_B_MKI67	BIRC5
CDC20	0	2.01495	0.58	0.008	0	gc_B_MKI67	CDC20
CKS1B	0	2.00724	0.841	0.065	0	gc_B_MKI67	CKS1B
CDK1	0	1.99134	0.742	0.008	0	gc_B_MKI67	CDK1
AURKB	0	1.98279	0.78	0.007	0	gc_B_MKI67	AURKB
CDKN3	0	1.97996	0.731	0.024	0	gc_B_MKI67	CDKN3
CCNB2	0	1.96235	0.652	0.004	0	gc_B_MKI67	CCNB2
CDCA7	0	1.77746	0.75	0.013	0	gc_B_MKI67	CDCA7
ZWINT	0	1.76498	0.784	0.006	0	gc_B_MKI67	ZWINT
CCNB1	0	1.69622	0.614	0.02	0	gc_B_MKI67	CCNB1
TPX2	0	1.6873	0.686	0.007	0	gc_B_MKI67	TPX2
SMC2	0	1.58145	0.761	0.039	0	gc_B_MKI67	SMC2
TACC3	0	1.56013	0.735	0.038	0	gc_B_MKI67	TACC3
MAD2L1	0	1.54172	0.735	0.021	0	gc_B_MKI67	MAD2L1
HMMR	0	1.51126	0.519	0.01	0	gc_B_MKI67	HMMR
CDCA3	0	1.49715	0.648	0.009	0	gc_B_MKI67	CDCA3
GTSE1	0	1.46134	0.598	0.006	0	gc_B_MKI67	GTSE1
ASF1B	0	1.45498	0.636	0.008	0	gc_B_MKI67	ASF1B
ACY3	0	1.44806	0.648	0.033	0	gc_B_MKI67	ACY3
GINS2	0	1.4419	0.561	0.013	0	gc_B_MKI67	GINS2
FEN1	0	1.42146	0.667	0.044	0	gc_B_MKI67	FEN1
CCNA2	0	1.40532	0.587	0.005	0	gc_B_MKI67	CCNA2
PLK1	0	1.39854	0.436	0.005	0	gc_B_MKI67	PLK1
DHFR	0	1.38423	0.617	0.032	0	gc_B_MKI67	DHFR
AICDA	0	1.37787	0.496	0.004	0	gc_B_MKI67	AICDA
EZH2	0	1.34121	0.663	0.037	0	gc_B_MKI67	EZH2
CLSPN	0	1.30175	0.561	0.009	0	gc_B_MKI67	CLSPN
KIFC1	0	1.28478	0.606	0.007	0	gc_B_MKI67	KIFC1
UBE2T	0	1.27504	0.678	0.028	0	gc_B_MKI67	UBE2T
NUF2	0	1.26288	0.542	0.004	0	gc_B_MKI67	NUF2
SPC25	0	1.25914	0.614	0.004	0	gc_B_MKI67	SPC25
CDCA8	0	1.23492	0.527	0.005	0	gc_B_MKI67	CDCA8
CENPW	0	1.22024	0.61	0.015	0	gc_B_MKI67	CENPW
SHCBP1	0	1.20313	0.595	0.017	0	gc_B_MKI67	SHCBP1
TYMS	0	1.17313	0.47	0.014	0	gc_B_MKI67	TYMS
AC023590.1	0	1.15318	0.568	0.023	0	gc_B_MKI67	AC023590.1
CENPU	0	1.0927	0.568	0.016	0	gc_B_MKI67	CENPU
SUGCT	0	1.05329	0.424	0.009	0	gc_B_MKI67	SUGCT
MND1	0	1.04285	0.576	0.005	0	gc_B_MKI67	MND1
ASPM	0	1.04275	0.447	0.007	0	gc_B_MKI67	ASPM
PBK	0	1.03239	0.508	0.003	0	gc_B_MKI67	PBK
ORC6	0	1.02354	0.553	0.013	0	gc_B_MKI67	ORC6
PRC1	0	1.00732	0.492	0.014	0	gc_B_MKI67	PRC1
RP11-620J15.3	0	1.0064	0.458	0.008	0	gc_B_MKI67	RP11-620J15.3
SGOL2	0	1.00585	0.402	0.003	0	gc_B_MKI67	SGOL2
SERPINA9	0	1.00045	0.466	0.013	0	gc_B_MKI67	SERPINA9
SGOL1	0	0.97018	0.47	0.005	0	gc_B_MKI67	SGOL1
MYBL1	0	0.954792	0.439	0.008	0	gc_B_MKI67	MYBL1
TUBB2B	0	0.943021	0.345	0.002	0	gc_B_MKI67	TUBB2B
DLGAP5	0	0.915394	0.39	0.004	0	gc_B_MKI67	DLGAP5
CDCA5	0	0.913751	0.447	0.004	0	gc_B_MKI67	CDCA5
NDC80	0	0.891916	0.462	0.013	0	gc_B_MKI67	NDC80
NCAPG	0	0.839991	0.428	0.008	0	gc_B_MKI67	NCAPG
C21orf58	0	0.822468	0.409	0.005	0	gc_B_MKI67	C21orf58
KIF2C	0	0.806268	0.42	0.003	0	gc_B_MKI67	KIF2C
CKAP2L	0	0.757813	0.348	0.003	0	gc_B_MKI67	CKAP2L
HJURP	0	0.748085	0.352	0.003	0	gc_B_MKI67	HJURP
DSCC1	0	0.708135	0.39	0.002	0	gc_B_MKI67	DSCC1
CDC45	0	0.69667	0.352	0.003	0	gc_B_MKI67	CDC45
CDCA2	0	0.677418	0.367	0.003	0	gc_B_MKI67	CDCA2
RAD51	1.8662e-306	0.610154	0.311	0.001	6.13813e-302	gc_B_MKI67	RAD51
TCL1A	7.54537e-305	2.65462	0.973	0.12	2.48175e-300	gc_B_MKI67	TCL1A
PCNA	3.99277e-303	2.20625	0.739	0.064	1.31326e-298	gc_B_MKI67	PCNA
KIF23	1.57362e-301	0.792224	0.367	0.005	5.17581e-297	gc_B_MKI67	KIF23
DNMT1	7.31229e-299	2.11734	0.871	0.102	2.40508e-294	gc_B_MKI67	DNMT1
ATP5G3	2.86107e-297	2.22428	0.833	0.088	9.41034e-293	gc_B_MKI67	ATP5G3
SPC24	1.08189e-296	0.638243	0.337	0.003	3.55844e-292	gc_B_MKI67	SPC24
WDR76	7.46349e-293	0.860122	0.443	0.013	2.45482e-288	gc_B_MKI67	WDR76
MCM7	1.90847e-289	1.80855	0.723	0.062	6.27716e-285	gc_B_MKI67	MCM7
VNN2	2.46157e-287	1.12679	0.64	0.041	8.09634e-283	gc_B_MKI67	VNN2
ATP5F1	7.37026e-286	1.68064	0.769	0.069	2.42415e-281	gc_B_MKI67	ATP5F1
BCL7A	2.35571e-285	1.20894	0.64	0.041	7.74818e-281	gc_B_MKI67	BCL7A
GCHFR	3.66947e-283	1.75152	0.792	0.084	1.20693e-278	gc_B_MKI67	GCHFR
NCAPH	8.4585e-283	0.613182	0.364	0.007	2.78209e-278	gc_B_MKI67	NCAPH
SF3B14	2.43497e-281	1.59334	0.75	0.066	8.00887e-277	gc_B_MKI67	SF3B14
DTYMK	6.12469e-279	1.23293	0.686	0.055	2.01447e-274	gc_B_MKI67	DTYMK
C14orf166	1.97671e-278	1.74349	0.777	0.075	6.50159e-274	gc_B_MKI67	C14orf166
AURKA	9.86808e-277	1.1599	0.417	0.013	3.24571e-272	gc_B_MKI67	AURKA
ATP5C1	6.03516e-276	1.53668	0.735	0.063	1.98502e-271	gc_B_MKI67	ATP5C1
CDCA4	1.42222e-273	1.02623	0.523	0.026	4.67782e-269	gc_B_MKI67	CDCA4
CHEK1	3.47135e-270	0.655288	0.375	0.009	1.14176e-265	gc_B_MKI67	CHEK1
MCM4	1.15697e-269	0.841168	0.413	0.012	3.80541e-265	gc_B_MKI67	MCM4
CENPK	6.09013e-264	0.781421	0.451	0.017	2.00311e-259	gc_B_MKI67	CENPK
SNX29P2	5.51318e-262	1.58201	0.803	0.08	1.81334e-257	gc_B_MKI67	SNX29P2
CEP55	1.32192e-260	0.620113	0.299	0.003	4.34791e-256	gc_B_MKI67	CEP55
CENPH	5.13404e-259	0.918662	0.523	0.028	1.68864e-254	gc_B_MKI67	CENPH
LSMD1	2.75219e-258	1.38983	0.652	0.051	9.05223e-254	gc_B_MKI67	LSMD1
SRSF10-1	6.24166e-258	0.902763	0.477	0.021	2.05294e-253	gc_B_MKI67	SRSF10-1
PSMA2-1	2.02747e-257	1.79613	0.777	0.083	6.66856e-253	gc_B_MKI67	PSMA2-1
PRR11	2.29716e-256	0.526875	0.295	0.003	7.5556e-252	gc_B_MKI67	PRR11
MELK	2.63646e-256	0.461575	0.277	0.002	8.67158e-252	gc_B_MKI67	MELK
CENPA	5.95404e-255	0.628556	0.311	0.004	1.95834e-250	gc_B_MKI67	CENPA
CASC5	6.38465e-255	0.629215	0.292	0.003	2.09997e-250	gc_B_MKI67	CASC5
CENPE	1.01839e-253	1.08173	0.386	0.012	3.34959e-249	gc_B_MKI67	CENPE
NEK2	2.23745e-253	0.66167	0.28	0.002	7.3592e-249	gc_B_MKI67	NEK2
SKA2	5.06409e-253	1.44064	0.75	0.084	1.66563e-248	gc_B_MKI67	SKA2
MCM3	2.99332e-251	1.47368	0.67	0.059	9.84534e-247	gc_B_MKI67	MCM3
ATP5J2	5.83589e-251	1.80911	0.799	0.093	1.91948e-246	gc_B_MKI67	ATP5J2
H2AFY	2.02542e-248	2.12727	0.955	0.178	6.66182e-244	gc_B_MKI67	H2AFY
CENPN	3.12538e-248	0.84928	0.473	0.024	1.02797e-243	gc_B_MKI67	CENPN
CCDC34	1.87426e-246	0.806702	0.443	0.019	6.16463e-242	gc_B_MKI67	CCDC34
DEK	2.27764e-246	2.39525	0.966	0.183	7.49139e-242	gc_B_MKI67	DEK
NEIL1	2.23987e-245	1.63818	0.754	0.083	7.36717e-241	gc_B_MKI67	NEIL1
SHFM1	2.83005e-245	1.48664	0.723	0.071	9.30831e-241	gc_B_MKI67	SHFM1
WDR66	8.70848e-245	0.546042	0.273	0.002	2.86431e-240	gc_B_MKI67	WDR66
KIF4A	8.91364e-243	0.465959	0.273	0.003	2.93179e-238	gc_B_MKI67	KIF4A
SPRED2	1.87914e-242	0.594633	0.348	0.009	6.18067e-238	gc_B_MKI67	SPRED2
RFC3	7.76741e-242	0.754489	0.413	0.016	2.55478e-237	gc_B_MKI67	RFC3
ATP5J	1.0838e-241	1.77258	0.761	0.086	3.56474e-237	gc_B_MKI67	ATP5J
TROAP	6.8709e-240	0.558456	0.295	0.004	2.25991e-235	gc_B_MKI67	TROAP
NUDT1	3.42733e-239	1.1998	0.712	0.071	1.12728e-234	gc_B_MKI67	NUDT1
HMGB2	2.63093e-238	4.21986	0.996	0.276	8.6534e-234	gc_B_MKI67	HMGB2
MYBL2	3.56201e-237	1.47709	0.633	0.055	1.17158e-232	gc_B_MKI67	MYBL2
RRM1	5.20238e-237	1.1345	0.576	0.043	1.71112e-232	gc_B_MKI67	RRM1
PKMYT1	3.6146e-236	0.670885	0.314	0.006	1.18888e-231	gc_B_MKI67	PKMYT1
OGG1	9.66245e-236	1.17154	0.64	0.057	3.17808e-231	gc_B_MKI67	OGG1
FANCI	4.3821e-235	0.608386	0.348	0.01	1.44132e-230	gc_B_MKI67	FANCI
BIK	7.63331e-235	1.89155	0.799	0.119	2.51067e-230	gc_B_MKI67	BIK
ESCO2	1.39742e-232	0.564861	0.28	0.004	4.59625e-228	gc_B_MKI67	ESCO2
KIF20B	1.87739e-232	1.18857	0.595	0.047	6.17493e-228	gc_B_MKI67	KIF20B
BRCA1	4.63257e-232	0.653677	0.379	0.013	1.5237e-227	gc_B_MKI67	BRCA1
ARHGAP11B	1.23416e-231	0.747412	0.322	0.007	4.05926e-227	gc_B_MKI67	ARHGAP11B
CCDC28B	5.63584e-231	0.684149	0.379	0.013	1.85368e-226	gc_B_MKI67	CCDC28B
UFD1L	7.62119e-231	0.912668	0.485	0.027	2.50668e-226	gc_B_MKI67	UFD1L
HAUS8	5.19631e-230	0.825258	0.451	0.023	1.70912e-225	gc_B_MKI67	HAUS8
SKA3	5.83259e-230	0.50898	0.273	0.003	1.9184e-225	gc_B_MKI67	SKA3
RAD51AP1	5.95431e-228	0.697828	0.379	0.014	1.95843e-223	gc_B_MKI67	RAD51AP1
ATPIF1	3.98742e-227	1.75495	0.739	0.086	1.3115e-222	gc_B_MKI67	ATPIF1
ATP5B	1.10509e-226	1.73569	0.739	0.087	3.63476e-222	gc_B_MKI67	ATP5B
OIP5	3.74964e-222	0.505288	0.303	0.007	1.23329e-217	gc_B_MKI67	OIP5
KPNA2	9.78574e-222	1.99668	0.735	0.094	3.21863e-217	gc_B_MKI67	KPNA2
KIAA1524	1.40955e-221	0.507939	0.265	0.003	4.63615e-217	gc_B_MKI67	KIAA1524
FAM111B	7.97004e-221	0.751932	0.371	0.014	2.62143e-216	gc_B_MKI67	FAM111B
ATP5A1	5.64145e-219	1.65558	0.742	0.089	1.85553e-214	gc_B_MKI67	ATP5A1
MRP63	1.26524e-218	1.05286	0.568	0.044	4.16148e-214	gc_B_MKI67	MRP63
KIF11	1.94333e-216	0.568259	0.314	0.008	6.39181e-212	gc_B_MKI67	KIF11
ASB13	2.35309e-216	0.62895	0.311	0.008	7.73956e-212	gc_B_MKI67	ASB13
C11orf48	3.18822e-216	0.906731	0.473	0.028	1.04864e-211	gc_B_MKI67	C11orf48
TCEB1	2.24026e-214	1.15482	0.629	0.058	7.36845e-210	gc_B_MKI67	TCEB1
DEPDC1B	4.43222e-213	0.562997	0.284	0.006	1.4578e-208	gc_B_MKI67	DEPDC1B
LRMP	1.34719e-212	2.07792	0.886	0.168	4.43103e-208	gc_B_MKI67	LRMP
CARHSP1	3.91451e-212	1.89869	0.894	0.178	1.28752e-207	gc_B_MKI67	CARHSP1
TCEB2	4.16806e-212	1.66625	0.826	0.116	1.37092e-207	gc_B_MKI67	TCEB2
CPM	2.6963e-211	0.736126	0.318	0.009	8.86841e-207	gc_B_MKI67	CPM
HELLS	1.40923e-210	1.04231	0.5	0.035	4.6351e-206	gc_B_MKI67	HELLS
ATP5L	1.95186e-206	2.77771	0.852	0.172	6.41987e-202	gc_B_MKI67	ATP5L
RACGAP1	3.55671e-205	0.579802	0.299	0.008	1.16984e-200	gc_B_MKI67	RACGAP1
MIS18A	9.65443e-205	0.670333	0.398	0.02	3.17544e-200	gc_B_MKI67	MIS18A
C19orf43	1.96703e-204	1.65954	0.807	0.116	6.46977e-200	gc_B_MKI67	C19orf43
MXD3	5.91399e-204	0.957483	0.424	0.025	1.94517e-199	gc_B_MKI67	MXD3
TUBB2A	4.24634e-203	1.21253	0.591	0.058	1.39666e-198	gc_B_MKI67	TUBB2A
ATAD2	6.46538e-203	1.01139	0.477	0.033	2.12653e-198	gc_B_MKI67	ATAD2
MTF2	6.81263e-203	1.34458	0.765	0.105	2.24074e-198	gc_B_MKI67	MTF2
RGS16	1.86341e-202	1.66095	0.78	0.117	6.12893e-198	gc_B_MKI67	RGS16
GMNN	1.4267e-200	1.02258	0.545	0.05	4.69255e-196	gc_B_MKI67	GMNN
ITGB3BP	3.05267e-200	1.03545	0.587	0.057	1.00405e-195	gc_B_MKI67	ITGB3BP
CCDC144A	3.49268e-200	0.931438	0.348	0.014	1.14878e-195	gc_B_MKI67	CCDC144A
POC1A	1.11568e-199	0.520651	0.277	0.006	3.66959e-195	gc_B_MKI67	POC1A
SELT	1.68779e-199	1.66258	0.78	0.11	5.55132e-195	gc_B_MKI67	SELT
YEATS4	5.4312e-198	0.992596	0.561	0.051	1.78638e-193	gc_B_MKI67	YEATS4
TUBB	3.75364e-196	3.75904	0.992	0.381	1.23461e-191	gc_B_MKI67	TUBB
STRA13	6.0087e-196	0.78277	0.424	0.025	1.97632e-191	gc_B_MKI67	STRA13
DNAJC9	1.44693e-195	1.35783	0.697	0.093	4.7591e-191	gc_B_MKI67	DNAJC9
FAM96B	1.71723e-195	1.06273	0.614	0.06	5.64814e-191	gc_B_MKI67	FAM96B
MEF2BNB-MEF2B	1.81483e-195	0.439235	0.273	0.006	5.96917e-191	gc_B_MKI67	MEF2BNB-MEF2B
POLA2	1.12727e-193	0.476042	0.284	0.008	3.70771e-189	gc_B_MKI67	POLA2
CTD-2369P2.2	5.16166e-193	0.823534	0.432	0.026	1.69772e-188	gc_B_MKI67	CTD-2369P2.2
FOXM1	1.99741e-192	0.492405	0.246	0.004	6.56968e-188	gc_B_MKI67	FOXM1
ATAD5	3.82209e-192	0.624879	0.352	0.016	1.25712e-187	gc_B_MKI67	ATAD5
C14orf2	5.80496e-192	1.70554	0.795	0.122	1.90931e-187	gc_B_MKI67	C14orf2
GCSAM	1.15889e-191	1.22225	0.633	0.072	3.81172e-187	gc_B_MKI67	GCSAM
PHF19	3.30105e-191	0.94569	0.485	0.04	1.08575e-186	gc_B_MKI67	PHF19
NDUFB8-1	9.59768e-191	1.24262	0.678	0.079	3.15677e-186	gc_B_MKI67	NDUFB8-1
SMS	1.54997e-188	1.24344	0.765	0.114	5.098e-184	gc_B_MKI67	SMS
RTFDC1	2.85877e-188	0.831134	0.519	0.043	9.40279e-184	gc_B_MKI67	RTFDC1
RP11-545E17.3	4.02517e-188	0.446432	0.242	0.004	1.32392e-183	gc_B_MKI67	RP11-545E17.3
UCHL1	4.7733e-188	0.740056	0.386	0.022	1.56999e-183	gc_B_MKI67	UCHL1
DUT	5.93279e-188	2.65407	0.936	0.266	1.95135e-183	gc_B_MKI67	DUT
STAG3	9.15106e-188	1.38218	0.784	0.109	3.00987e-183	gc_B_MKI67	STAG3
FABP5	1.02347e-187	1.55183	0.75	0.112	3.36629e-183	gc_B_MKI67	FABP5
NDC1	3.00458e-186	0.681766	0.394	0.023	9.88238e-182	gc_B_MKI67	NDC1
BUB1B	1.34866e-183	0.487723	0.254	0.006	4.43589e-179	gc_B_MKI67	BUB1B
ATP5O	7.34641e-183	1.49972	0.75	0.109	2.41631e-178	gc_B_MKI67	ATP5O
PSRC1	1.14739e-182	0.428626	0.189	0.001	3.77387e-178	gc_B_MKI67	PSRC1
CENPM	4.15474e-182	1.50817	0.879	0.178	1.36654e-177	gc_B_MKI67	CENPM
NUCKS1	3.99415e-181	2.19922	0.951	0.279	1.31371e-176	gc_B_MKI67	NUCKS1
C16orf80	6.10281e-181	0.671462	0.383	0.021	2.00727e-176	gc_B_MKI67	C16orf80
BPNT1	7.22291e-181	0.8049	0.511	0.046	2.37569e-176	gc_B_MKI67	BPNT1
SAE1	1.65185e-179	1.09792	0.606	0.073	5.43312e-175	gc_B_MKI67	SAE1
DCK	5.3102e-179	1.47019	0.867	0.148	1.74658e-174	gc_B_MKI67	DCK
C11orf83	1.27307e-178	0.603391	0.356	0.018	4.18726e-174	gc_B_MKI67	C11orf83
MCM2	1.87683e-178	0.600121	0.341	0.016	6.17307e-174	gc_B_MKI67	MCM2
PSMA4	2.44116e-178	1.81835	0.898	0.218	8.02921e-174	gc_B_MKI67	PSMA4
C20orf196	6.98651e-178	0.546018	0.322	0.014	2.29793e-173	gc_B_MKI67	C20orf196
RCC1	1.00891e-177	0.650731	0.379	0.022	3.31842e-173	gc_B_MKI67	RCC1
BCAS4	1.21601e-177	1.61743	0.913	0.189	3.99956e-173	gc_B_MKI67	BCAS4
SMARCA4	1.9324e-177	1.27798	0.682	0.101	6.35587e-173	gc_B_MKI67	SMARCA4
HMGN2	8.46506e-177	3.65184	1	0.538	2.78424e-172	gc_B_MKI67	HMGN2
SYNE2	2.19081e-176	1.46852	0.803	0.153	7.2058e-172	gc_B_MKI67	SYNE2
C17orf62	2.3614e-176	1.09295	0.595	0.064	7.76689e-172	gc_B_MKI67	C17orf62
USP1	2.76238e-176	1.26404	0.712	0.108	9.08574e-172	gc_B_MKI67	USP1
SUSD3	4.05704e-176	1.41882	0.735	0.12	1.3344e-171	gc_B_MKI67	SUSD3
H2AFZ	5.78454e-176	3.6929	1	0.541	1.90259e-171	gc_B_MKI67	H2AFZ
ARHGAP11A	1.20211e-175	0.500435	0.269	0.008	3.95386e-171	gc_B_MKI67	ARHGAP11A
ARPC4	1.89739e-175	1.45625	0.871	0.166	6.24069e-171	gc_B_MKI67	ARPC4
TMEM261	2.55023e-174	0.82349	0.443	0.033	8.38797e-170	gc_B_MKI67	TMEM261
SNRPD1	2.44496e-173	1.88534	0.936	0.269	8.04171e-169	gc_B_MKI67	SNRPD1
MCM6	5.41014e-172	0.781274	0.443	0.035	1.77945e-167	gc_B_MKI67	MCM6
CBX5	6.52717e-172	1.13726	0.697	0.104	2.14685e-167	gc_B_MKI67	CBX5
CKS2	6.93996e-172	1.9823	0.894	0.203	2.28262e-167	gc_B_MKI67	CKS2
WHSC1	7.60242e-171	0.454869	0.246	0.006	2.50051e-166	gc_B_MKI67	WHSC1
SLC43A3	1.66106e-170	0.48465	0.299	0.012	5.46338e-166	gc_B_MKI67	SLC43A3
HIST1H1B	1.11848e-169	1.12885	0.345	0.019	3.67881e-165	gc_B_MKI67	HIST1H1B
VRK1	3.388e-169	1.00509	0.572	0.066	1.11435e-164	gc_B_MKI67	VRK1
C11orf73	1.90725e-168	0.698192	0.424	0.031	6.27313e-164	gc_B_MKI67	C11orf73
METAP2	2.67102e-168	1.97293	0.852	0.2	8.78525e-164	gc_B_MKI67	METAP2
TUBA1B	7.17095e-168	3.73713	0.989	0.539	2.3586e-163	gc_B_MKI67	TUBA1B
AC079767.4	1.01142e-167	0.982786	0.451	0.036	3.32667e-163	gc_B_MKI67	AC079767.4
ARPC5	5.97582e-167	2.02297	0.958	0.309	1.96551e-162	gc_B_MKI67	ARPC5
RAMP1	2.08076e-166	0.590141	0.258	0.008	6.84383e-162	gc_B_MKI67	RAMP1
HMGN1	3.36585e-166	2.87667	1	0.599	1.10706e-161	gc_B_MKI67	HMGN1
COMMD7	3.86825e-166	0.78599	0.489	0.045	1.27231e-161	gc_B_MKI67	COMMD7
SPAG5	9.88484e-166	0.430433	0.246	0.007	3.25122e-161	gc_B_MKI67	SPAG5
KIF22	3.5658e-165	1.32869	0.705	0.124	1.17283e-160	gc_B_MKI67	KIF22
LBR	6.97879e-165	1.2431	0.708	0.111	2.29539e-160	gc_B_MKI67	LBR
ANP32B	1.933e-164	2.4553	0.992	0.501	6.35784e-160	gc_B_MKI67	ANP32B
RPA3	2.44094e-164	1.64941	0.871	0.212	8.02848e-160	gc_B_MKI67	RPA3
HDGFRP2	3.99484e-164	0.407415	0.227	0.005	1.31394e-159	gc_B_MKI67	HDGFRP2
HMGB1	7.63304e-164	3.28495	1	0.78	2.51058e-159	gc_B_MKI67	HMGB1
TUBB4B	6.12227e-163	2.56487	0.928	0.311	2.01367e-158	gc_B_MKI67	TUBB4B
HOPX	7.87868e-163	1.13731	0.511	0.051	2.59138e-158	gc_B_MKI67	HOPX
C7orf55-LUC7L2	5.22132e-162	0.706545	0.42	0.032	1.71734e-157	gc_B_MKI67	C7orf55-LUC7L2
CALM3	1.42953e-160	2.0344	0.917	0.291	4.70186e-156	gc_B_MKI67	CALM3
HAUS1	2.70774e-160	0.97396	0.587	0.076	8.90603e-156	gc_B_MKI67	HAUS1
FBXO5	5.64649e-160	0.704385	0.36	0.023	1.85719e-155	gc_B_MKI67	FBXO5
ACOT7	2.27463e-159	0.549128	0.314	0.016	7.48149e-155	gc_B_MKI67	ACOT7
TCF19	2.30331e-159	0.662086	0.352	0.022	7.57582e-155	gc_B_MKI67	TCF19
BCL2L12	5.23357e-159	1.00203	0.636	0.099	1.72137e-154	gc_B_MKI67	BCL2L12
SLC25A5	5.79275e-159	2.37296	1	0.605	1.90529e-154	gc_B_MKI67	SLC25A5
PKM	6.34428e-159	2.18836	0.989	0.417	2.0867e-154	gc_B_MKI67	PKM
CBX1	7.17521e-159	0.848902	0.561	0.067	2.36e-154	gc_B_MKI67	CBX1
ASRGL1	1.4527e-158	0.507824	0.295	0.014	4.77807e-154	gc_B_MKI67	ASRGL1
GAPDH	4.29463e-158	2.848	1	0.878	1.41255e-153	gc_B_MKI67	GAPDH
KNSTRN	9.27122e-158	0.726093	0.36	0.024	3.0494e-153	gc_B_MKI67	KNSTRN
C11orf31	9.84851e-158	1.17709	0.735	0.111	3.23927e-153	gc_B_MKI67	C11orf31
CFL1	2.03084e-157	2.46638	1	0.79	6.67962e-153	gc_B_MKI67	CFL1
ATP5H	2.48611e-157	0.975578	0.561	0.064	8.17708e-153	gc_B_MKI67	ATP5H
PARP1	6.52596e-156	2.1216	0.981	0.422	2.14645e-151	gc_B_MKI67	PARP1
U2AF1	8.94647e-156	1.72614	0.909	0.254	2.94258e-151	gc_B_MKI67	U2AF1
CCDC23	1.05616e-155	0.567049	0.341	0.02	3.47382e-151	gc_B_MKI67	CCDC23
RGS10	1.7779e-155	1.29569	0.784	0.157	5.84768e-151	gc_B_MKI67	RGS10
RAN	2.3207e-154	2.3326	0.996	0.577	7.63301e-150	gc_B_MKI67	RAN
ACTG1	8.12973e-154	2.74906	1	0.82	2.67395e-149	gc_B_MKI67	ACTG1
DTX1	8.77579e-154	0.654053	0.398	0.031	2.88644e-149	gc_B_MKI67	DTX1
FANCB	8.81986e-154	0.457237	0.265	0.01	2.90094e-149	gc_B_MKI67	FANCB
PTMA	1.49975e-153	2.18125	1	0.973	4.93283e-149	gc_B_MKI67	PTMA
H3F3A	1.0247e-152	2.55202	1	0.87	3.37035e-148	gc_B_MKI67	H3F3A
LPP	3.58647e-152	1.46788	0.693	0.115	1.17963e-147	gc_B_MKI67	LPP
ANP32E	1.34786e-151	1.5347	0.826	0.194	4.43324e-147	gc_B_MKI67	ANP32E
NHP2L1	1.95869e-151	1.24917	0.72	0.114	6.44232e-147	gc_B_MKI67	NHP2L1
ARPC2	3.83209e-151	2.35053	1	0.728	1.26041e-146	gc_B_MKI67	ARPC2
ATP5G1	4.20247e-151	1.10691	0.534	0.061	1.38224e-146	gc_B_MKI67	ATP5G1
PRDX6	1.24735e-150	2.22479	0.97	0.437	4.10267e-146	gc_B_MKI67	PRDX6
C19orf48	1.90013e-150	1.14847	0.636	0.1	6.24973e-146	gc_B_MKI67	C19orf48
FAM103A1	5.41187e-150	0.570498	0.348	0.022	1.78002e-145	gc_B_MKI67	FAM103A1
SNRNP25	1.13758e-149	1.2063	0.727	0.141	3.74163e-145	gc_B_MKI67	SNRNP25
RFC2	1.62028e-149	0.857624	0.481	0.052	5.32926e-145	gc_B_MKI67	RFC2
NCAPD2	1.82263e-149	0.675106	0.364	0.026	5.99481e-145	gc_B_MKI67	NCAPD2
CORO1A	6.96204e-149	2.30834	0.992	0.571	2.28988e-144	gc_B_MKI67	CORO1A
ERH	2.0922e-148	1.97509	0.97	0.436	6.88147e-144	gc_B_MKI67	ERH
ATP5E	1.02036e-147	1.88592	0.848	0.192	3.35606e-143	gc_B_MKI67	ATP5E
RFTN1	1.03126e-147	1.03537	0.746	0.128	3.39191e-143	gc_B_MKI67	RFTN1
PFN1	1.29539e-147	2.28029	1	0.872	4.26067e-143	gc_B_MKI67	PFN1
DBI	2.70186e-147	2.09636	0.989	0.482	8.88668e-143	gc_B_MKI67	DBI
GRHPR	1.28006e-146	1.30996	0.75	0.164	4.21026e-142	gc_B_MKI67	GRHPR
GNB2L1	1.4405e-146	2.14921	0.852	0.216	4.73795e-142	gc_B_MKI67	GNB2L1
KIAA0922	1.53988e-146	0.700512	0.356	0.024	5.06483e-142	gc_B_MKI67	KIAA0922
RNASEH2A	1.56637e-146	0.853228	0.485	0.056	5.15194e-142	gc_B_MKI67	RNASEH2A
ARHGEF39	1.14391e-145	0.424963	0.239	0.008	3.76243e-141	gc_B_MKI67	ARHGEF39
CDT1	1.21764e-145	0.453137	0.216	0.006	4.00494e-141	gc_B_MKI67	CDT1
NASP	1.77484e-145	1.5359	0.822	0.197	5.83764e-141	gc_B_MKI67	NASP
CPSF3L	1.93987e-145	0.556697	0.326	0.02	6.38042e-141	gc_B_MKI67	CPSF3L
RANBP1	2.25835e-145	1.84051	0.905	0.299	7.42794e-141	gc_B_MKI67	RANBP1
PRDX3	5.58929e-145	1.64786	0.89	0.286	1.83837e-140	gc_B_MKI67	PRDX3
H2AFV	9.25312e-145	2.04751	0.962	0.42	3.04344e-140	gc_B_MKI67	H2AFV
GOT2	4.84417e-144	0.986155	0.53	0.071	1.5933e-139	gc_B_MKI67	GOT2
LMNB1	1.64419e-143	0.855136	0.443	0.044	5.40792e-139	gc_B_MKI67	LMNB1
PGAM1	3.25221e-143	1.49925	0.826	0.207	1.06968e-138	gc_B_MKI67	PGAM1
DDX39A	1.05657e-142	1.54012	0.864	0.24	3.47516e-138	gc_B_MKI67	DDX39A
FAM96A	1.07596e-142	0.783068	0.504	0.055	3.53893e-138	gc_B_MKI67	FAM96A
CHD4	2.16465e-142	0.954461	0.633	0.096	7.11974e-138	gc_B_MKI67	CHD4
ATP5G2	5.44218e-142	1.47919	0.814	0.163	1.78999e-137	gc_B_MKI67	ATP5G2
SPDL1	6.1198e-142	0.494296	0.295	0.016	2.01286e-137	gc_B_MKI67	SPDL1
MYEOV2	6.33017e-142	0.910565	0.568	0.072	2.08205e-137	gc_B_MKI67	MYEOV2
ACTB	6.60878e-142	2.17963	1	0.96	2.17369e-137	gc_B_MKI67	ACTB
RUVBL1	2.61164e-141	0.894308	0.508	0.063	8.58993e-137	gc_B_MKI67	RUVBL1
TSSC1	6.60347e-141	0.435816	0.277	0.014	2.17195e-136	gc_B_MKI67	TSSC1
C14orf142	2.46501e-140	0.431117	0.265	0.012	8.10765e-136	gc_B_MKI67	C14orf142
HNRNPA1	2.48449e-140	2.31262	0.996	0.796	8.17172e-136	gc_B_MKI67	HNRNPA1
HMGA1	4.74014e-140	1.66207	0.852	0.24	1.55908e-135	gc_B_MKI67	HMGA1
RP11-345J4.5	1.20117e-139	0.84417	0.504	0.057	3.95077e-135	gc_B_MKI67	RP11-345J4.5
NAP1L1	1.28232e-139	2.03059	0.97	0.416	4.21768e-135	gc_B_MKI67	NAP1L1
C7orf73	2.29873e-139	0.658735	0.42	0.038	7.56076e-135	gc_B_MKI67	C7orf73
MPC2	6.5976e-139	1.56604	0.886	0.295	2.17002e-134	gc_B_MKI67	MPC2
ARPC1A	6.70369e-139	0.658032	0.375	0.03	2.20491e-134	gc_B_MKI67	ARPC1A
RFC4	1.00101e-138	0.708474	0.413	0.04	3.29242e-134	gc_B_MKI67	RFC4
SNRPE	1.63106e-138	1.5891	0.841	0.228	5.36471e-134	gc_B_MKI67	SNRPE
SNRPB	1.72734e-138	1.78545	0.955	0.38	5.68139e-134	gc_B_MKI67	SNRPB
PLIN3	3.85057e-138	1.41126	0.67	0.13	1.26649e-133	gc_B_MKI67	PLIN3
SERF2	4.89518e-138	1.77058	1	0.946	1.61007e-133	gc_B_MKI67	SERF2
BARD1	6.61757e-138	0.808679	0.47	0.054	2.17658e-133	gc_B_MKI67	BARD1
RP11-1070N10.3	1.5178e-136	0.459207	0.242	0.01	4.9922e-132	gc_B_MKI67	RP11-1070N10.3
INCENP	1.62568e-136	0.570875	0.288	0.017	5.34701e-132	gc_B_MKI67	INCENP
MRPL51	6.08435e-136	1.88926	0.909	0.381	2.0012e-131	gc_B_MKI67	MRPL51
TKT	7.18788e-136	1.61854	0.886	0.29	2.36416e-131	gc_B_MKI67	TKT
FKBP1A	8.50475e-136	1.44779	0.917	0.286	2.7973e-131	gc_B_MKI67	FKBP1A
NDUFA7-1	9.67876e-136	0.715723	0.417	0.039	3.18344e-131	gc_B_MKI67	NDUFA7-1
GPSM2	1.72663e-134	0.432643	0.25	0.011	5.67906e-130	gc_B_MKI67	GPSM2
PMF1	4.17434e-134	0.812348	0.481	0.057	1.37298e-129	gc_B_MKI67	PMF1
PPIA	2.73468e-133	1.78341	1	0.832	8.99464e-129	gc_B_MKI67	PPIA
FTSJ2	2.80475e-133	0.414657	0.246	0.011	9.22512e-129	gc_B_MKI67	FTSJ2
LSM5	6.7783e-133	1.59913	0.913	0.339	2.22945e-128	gc_B_MKI67	LSM5
COX8A	1.1744e-132	1.78457	0.981	0.558	3.86271e-128	gc_B_MKI67	COX8A
SRSF3	1.21773e-132	1.9493	0.973	0.431	4.00523e-128	gc_B_MKI67	SRSF3
MZT1	5.42963e-132	1.04331	0.663	0.124	1.78586e-127	gc_B_MKI67	MZT1
ACN9	6.99407e-132	0.494444	0.311	0.02	2.30042e-127	gc_B_MKI67	ACN9
LCK	7.11731e-132	0.911418	0.527	0.066	2.34095e-127	gc_B_MKI67	LCK
SSRP1	7.24622e-132	1.14843	0.674	0.135	2.38335e-127	gc_B_MKI67	SSRP1
CLTA	1.28872e-131	1.45951	0.898	0.306	4.23873e-127	gc_B_MKI67	CLTA
SLMO2	2.73594e-131	0.61044	0.356	0.028	8.99879e-127	gc_B_MKI67	SLMO2
PROSC	2.9128e-131	0.413515	0.254	0.012	9.58048e-127	gc_B_MKI67	PROSC
SUMO2	7.75625e-131	1.81059	0.992	0.713	2.55111e-126	gc_B_MKI67	SUMO2
CAPZA1	1.40341e-130	1.54649	0.913	0.284	4.61597e-126	gc_B_MKI67	CAPZA1
HMCES	3.46855e-130	1.70205	0.883	0.329	1.14084e-125	gc_B_MKI67	HMCES
COMMD8	1.64075e-129	0.855392	0.564	0.085	5.39659e-125	gc_B_MKI67	COMMD8
IL4R	1.18604e-128	0.669845	0.527	0.066	3.901e-124	gc_B_MKI67	IL4R
DAAM1	6.74837e-128	1.20524	0.659	0.123	2.21961e-123	gc_B_MKI67	DAAM1
RBBP7	8.96293e-128	1.46352	0.833	0.251	2.948e-123	gc_B_MKI67	RBBP7
PPP1CA	9.78334e-128	1.70578	0.966	0.499	3.21784e-123	gc_B_MKI67	PPP1CA
PRDX1	1.46811e-127	2.07239	0.977	0.62	4.82877e-123	gc_B_MKI67	PRDX1
TMEM106C	1.95053e-127	1.02928	0.534	0.085	6.41549e-123	gc_B_MKI67	TMEM106C
PARPBP	2.59994e-127	0.418425	0.242	0.012	8.55145e-123	gc_B_MKI67	PARPBP
USMG5	4.46691e-126	1.02792	0.64	0.104	1.46921e-121	gc_B_MKI67	USMG5
CCT5	9.53862e-126	1.13791	0.739	0.162	3.13735e-121	gc_B_MKI67	CCT5
RFC5	9.83917e-126	0.468414	0.307	0.022	3.2362e-121	gc_B_MKI67	RFC5
LSM4	1.1652e-125	1.27369	0.761	0.194	3.83247e-121	gc_B_MKI67	LSM4
SMC3	1.82846e-125	1.05291	0.686	0.135	6.01398e-121	gc_B_MKI67	SMC3
NAA38	2.16913e-125	1.59996	0.89	0.341	7.13447e-121	gc_B_MKI67	NAA38
MSH2	3.68143e-125	0.533946	0.36	0.031	1.21086e-120	gc_B_MKI67	MSH2
ARL6IP6	5.4077e-125	0.894262	0.598	0.1	1.77865e-120	gc_B_MKI67	ARL6IP6
UBE2L3	1.748e-124	1.38598	0.856	0.274	5.74933e-120	gc_B_MKI67	UBE2L3
BUB1	2.82734e-124	0.515506	0.254	0.014	9.29939e-120	gc_B_MKI67	BUB1
SLC25A3	4.82519e-124	1.68197	0.985	0.595	1.58705e-119	gc_B_MKI67	SLC25A3
SSBP2	6.84779e-124	0.948533	0.576	0.091	2.25231e-119	gc_B_MKI67	SSBP2
MYL6	9.09344e-124	1.55611	0.996	0.851	2.99092e-119	gc_B_MKI67	MYL6
UGP2	3.31446e-123	1.20352	0.742	0.177	1.09016e-118	gc_B_MKI67	UGP2
LSM3	8.65885e-123	1.4625	0.898	0.33	2.84798e-118	gc_B_MKI67	LSM3
HMGXB4	9.77031e-123	0.6821	0.462	0.057	3.21355e-118	gc_B_MKI67	HMGXB4
CALM2	1.74575e-122	1.99566	0.996	0.721	5.74196e-118	gc_B_MKI67	CALM2
A4GALT	1.22642e-121	0.447139	0.239	0.012	4.03381e-117	gc_B_MKI67	A4GALT
TMPO	1.45817e-121	1.27245	0.811	0.208	4.79606e-117	gc_B_MKI67	TMPO
ACTR3	2.15717e-121	1.68831	0.97	0.445	7.09516e-117	gc_B_MKI67	ACTR3
SORL1	1.3967e-120	0.489684	0.386	0.037	4.59388e-116	gc_B_MKI67	SORL1
CHMP4A	2.18773e-120	0.821463	0.549	0.081	7.19566e-116	gc_B_MKI67	CHMP4A
HMGB3	2.31371e-120	1.03695	0.515	0.086	7.61003e-116	gc_B_MKI67	HMGB3
HDAC1	3.30207e-120	1.25177	0.807	0.209	1.08608e-115	gc_B_MKI67	HDAC1
FANCA	5.56999e-120	0.678157	0.405	0.046	1.83202e-115	gc_B_MKI67	FANCA
TPGS2	6.53722e-120	0.905878	0.545	0.093	2.15016e-115	gc_B_MKI67	TPGS2
BUB3	7.8364e-120	1.49509	0.837	0.27	2.57747e-115	gc_B_MKI67	BUB3
LRR1	1.71792e-119	0.62795	0.39	0.043	5.6504e-115	gc_B_MKI67	LRR1
HNRNPA3	3.80719e-119	1.60322	0.996	0.537	1.25222e-114	gc_B_MKI67	HNRNPA3
LSM6	8.74319e-119	1.25814	0.773	0.198	2.87572e-114	gc_B_MKI67	LSM6
LDHB	1.01577e-118	1.72592	0.97	0.557	3.34097e-114	gc_B_MKI67	LDHB
RBX1	1.54592e-118	1.53412	0.913	0.381	5.0847e-114	gc_B_MKI67	RBX1
PAG1	2.58011e-118	0.848069	0.576	0.095	8.48623e-114	gc_B_MKI67	PAG1
ARPC1B	1.43118e-117	1.62467	0.989	0.469	4.70729e-113	gc_B_MKI67	ARPC1B
CD79B	1.48273e-117	2.07229	0.951	0.457	4.87684e-113	gc_B_MKI67	CD79B
PAFAH1B3	3.00496e-117	0.877273	0.489	0.073	9.8836e-113	gc_B_MKI67	PAFAH1B3
HIST1H4C	5.16172e-117	3.87096	0.943	0.524	1.69774e-112	gc_B_MKI67	HIST1H4C
ITGAE	5.80491e-117	1.23327	0.765	0.201	1.90929e-112	gc_B_MKI67	ITGAE
ALOX5AP	6.01012e-117	0.968863	0.739	0.145	1.97679e-112	gc_B_MKI67	ALOX5AP
POLR2G	6.60679e-116	1.1155	0.765	0.19	2.17304e-111	gc_B_MKI67	POLR2G
HNRNPA2B1	1.38427e-115	1.63284	0.996	0.83	4.553e-111	gc_B_MKI67	HNRNPA2B1
BLOC1S1	3.14802e-115	1.19125	0.852	0.257	1.03542e-110	gc_B_MKI67	BLOC1S1
SNRPF	7.70193e-115	1.30283	0.845	0.254	2.53324e-110	gc_B_MKI67	SNRPF
QARS	2.96868e-114	0.91894	0.61	0.117	9.76429e-110	gc_B_MKI67	QARS
HPRT1	3.58726e-114	0.873211	0.545	0.092	1.17989e-109	gc_B_MKI67	HPRT1
CHCHD2	4.10047e-114	1.55529	0.989	0.766	1.34869e-109	gc_B_MKI67	CHCHD2
ENO1	8.54666e-114	1.80479	0.913	0.4	2.81108e-109	gc_B_MKI67	ENO1
RPA1	1.97292e-113	0.625241	0.455	0.059	6.48911e-109	gc_B_MKI67	RPA1
TPI1	1.18726e-112	1.69431	0.962	0.537	3.90501e-108	gc_B_MKI67	TPI1
POMP	5.34745e-112	1.5158	0.951	0.471	1.75883e-107	gc_B_MKI67	POMP
MRPL12	1.10108e-111	0.657778	0.409	0.05	3.62157e-107	gc_B_MKI67	MRPL12
CHAF1A	1.14205e-111	0.528066	0.299	0.024	3.75633e-107	gc_B_MKI67	CHAF1A
UQCR11-1	4.65578e-111	1.02203	0.689	0.133	1.53133e-106	gc_B_MKI67	UQCR11-1
CEBPZ-AS1	4.88403e-111	0.464301	0.299	0.023	1.60641e-106	gc_B_MKI67	CEBPZ-AS1
TCTEX1D2	7.45279e-111	0.485911	0.318	0.028	2.4513e-106	gc_B_MKI67	TCTEX1D2
LCP1	8.53106e-111	1.29792	0.913	0.276	2.80595e-106	gc_B_MKI67	LCP1
WDR1	1.49942e-110	1.26077	0.818	0.245	4.93174e-106	gc_B_MKI67	WDR1
CCDC109B	2.44247e-110	0.553234	0.367	0.037	8.03353e-106	gc_B_MKI67	CCDC109B
NUDT21	5.24383e-110	1.14678	0.742	0.215	1.72475e-105	gc_B_MKI67	NUDT21
OAZ1	1.06416e-109	1.31224	1	0.939	3.50013e-105	gc_B_MKI67	OAZ1
C12orf75	1.37391e-109	0.933395	0.534	0.09	4.51893e-105	gc_B_MKI67	C12orf75
CCDC167	3.40719e-109	1.20975	0.75	0.232	1.12066e-104	gc_B_MKI67	CCDC167
TIPIN	5.05488e-109	0.465151	0.261	0.018	1.6626e-104	gc_B_MKI67	TIPIN
TMBIM4-1	1.37438e-108	0.816922	0.587	0.097	4.52048e-104	gc_B_MKI67	TMBIM4-1
TUBA1C	6.42626e-108	1.24158	0.644	0.151	2.11366e-103	gc_B_MKI67	TUBA1C
CCNI	1.44346e-107	1.58666	0.996	0.745	4.74768e-103	gc_B_MKI67	CCNI
HNRNPM	1.82403e-107	1.37819	0.902	0.345	5.99942e-103	gc_B_MKI67	HNRNPM
NUP62	4.01059e-107	0.722456	0.473	0.072	1.31912e-102	gc_B_MKI67	NUP62
GLRX3	4.3276e-107	0.952609	0.636	0.143	1.42339e-102	gc_B_MKI67	GLRX3
ATP5I	7.47716e-107	0.887514	0.644	0.117	2.45931e-102	gc_B_MKI67	ATP5I
MCM5	9.19218e-107	1.14333	0.64	0.14	3.0234e-102	gc_B_MKI67	MCM5
ACAT2	1.02456e-106	0.700953	0.413	0.054	3.36987e-102	gc_B_MKI67	ACAT2
RP11-94L15.2	1.17258e-106	0.596597	0.417	0.05	3.85674e-102	gc_B_MKI67	RP11-94L15.2
BRK1	1.20865e-106	1.45942	0.962	0.495	3.97538e-102	gc_B_MKI67	BRK1
YWHAB	3.14823e-106	1.51294	0.973	0.56	1.03548e-101	gc_B_MKI67	YWHAB
ARPC3	1.29539e-105	1.48361	1	0.794	4.26066e-101	gc_B_MKI67	ARPC3
LDHA	1.69108e-105	1.76031	0.883	0.386	5.56214e-101	gc_B_MKI67	LDHA
CAP1	1.8879e-105	1.32226	0.924	0.355	6.20948e-101	gc_B_MKI67	CAP1
RPS2	2.65925e-105	1.70783	1	0.975	8.74654e-101	gc_B_MKI67	RPS2
DUSP1	3.58871e-105	-3.09003	0.33	0.889	1.18036e-100	gc_B_MKI67	DUSP1
HNRNPC	4.45059e-105	1.49106	0.966	0.528	1.46384e-100	gc_B_MKI67	HNRNPC
RAD21	8.16753e-105	1.44377	0.818	0.273	2.68638e-100	gc_B_MKI67	RAD21
BANF1	8.73015e-105	1.30219	0.845	0.299	2.87143e-100	gc_B_MKI67	BANF1
DEF8	1.31219e-104	1.09645	0.655	0.174	4.31591e-100	gc_B_MKI67	DEF8
MSH6	1.35382e-104	0.688662	0.42	0.058	4.45284e-100	gc_B_MKI67	MSH6
SIT1	1.38555e-104	1.00452	0.667	0.142	4.55723e-100	gc_B_MKI67	SIT1
SUMO1	2.02285e-104	1.23617	0.894	0.331	6.65336e-100	gc_B_MKI67	SUMO1
RP11-220I1.1	6.89515e-104	0.692087	0.451	0.061	2.26789e-99	gc_B_MKI67	RP11-220I1.1
C16orf13	1.16363e-103	0.508065	0.318	0.03	3.82728e-99	gc_B_MKI67	C16orf13
TUBG1	1.50701e-103	0.756583	0.466	0.079	4.9567e-99	gc_B_MKI67	TUBG1
2024-09-15	2.25372e-103	0.779517	0.614	0.109	7.41271e-99	gc_B_MKI67	2024-09-15
EXOSC3	3.10246e-103	0.695342	0.485	0.078	1.02043e-98	gc_B_MKI67	EXOSC3
NONO	3.11429e-103	1.12196	0.799	0.24	1.02432e-98	gc_B_MKI67	NONO
TEX30	4.13823e-103	0.605365	0.413	0.056	1.36111e-98	gc_B_MKI67	TEX30
RFC1	5.90075e-103	1.11212	0.701	0.188	1.94081e-98	gc_B_MKI67	RFC1
RPL15	3.5895e-102	1.34255	1	0.967	1.18062e-97	gc_B_MKI67	RPL15
FIBP	4.54519e-102	1.02232	0.686	0.176	1.49496e-97	gc_B_MKI67	FIBP
SPIB	8.21206e-102	0.961174	0.678	0.137	2.70103e-97	gc_B_MKI67	SPIB
RPRD1B	8.49097e-102	0.670312	0.371	0.045	2.79277e-97	gc_B_MKI67	RPRD1B
CD22	1.62312e-101	0.991914	0.754	0.167	5.33862e-97	gc_B_MKI67	CD22
ARHGDIB	2.67838e-101	1.50623	0.996	0.73	8.80947e-97	gc_B_MKI67	ARHGDIB
SYPL1	7.34806e-101	1.25959	0.864	0.268	2.41685e-96	gc_B_MKI67	SYPL1
CNTRL	1.98936e-100	0.980792	0.72	0.174	6.54321e-96	gc_B_MKI67	CNTRL
BUD31	4.10953e-100	1.05784	0.773	0.228	1.35167e-95	gc_B_MKI67	BUD31
RPS20	8.60801e-100	1.99675	0.958	0.519	2.83126e-95	gc_B_MKI67	RPS20
PSMA7	1.68093e-99	1.4654	0.939	0.507	5.52873e-95	gc_B_MKI67	PSMA7
RPL23	1.90958e-99	1.8165	0.973	0.665	6.28081e-95	gc_B_MKI67	RPL23
TCEA1	4.64646e-99	1.45242	0.958	0.531	1.52827e-94	gc_B_MKI67	TCEA1
IMP4	9.60365e-99	1.2539	0.742	0.24	3.15874e-94	gc_B_MKI67	IMP4
CCDC18	1.01033e-98	0.533215	0.356	0.041	3.32306e-94	gc_B_MKI67	CCDC18
ALDOA	1.07354e-98	1.47722	0.962	0.622	3.53097e-94	gc_B_MKI67	ALDOA
MRPL47	1.71325e-98	0.78168	0.568	0.116	5.63504e-94	gc_B_MKI67	MRPL47
C6orf48	2.91347e-98	1.01255	0.693	0.159	9.5827e-94	gc_B_MKI67	C6orf48
VDAC1	4.2445e-98	1.24331	0.814	0.289	1.39606e-93	gc_B_MKI67	VDAC1
SUPT4H1	4.89797e-98	1.04086	0.735	0.216	1.61099e-93	gc_B_MKI67	SUPT4H1
MOB1A	6.70639e-98	1.21747	0.902	0.329	2.2058e-93	gc_B_MKI67	MOB1A
SNRPG	7.05204e-98	1.45136	0.909	0.448	2.31949e-93	gc_B_MKI67	SNRPG
SRSF1	8.96526e-98	0.831997	0.606	0.126	2.94877e-93	gc_B_MKI67	SRSF1
MFHAS1	1.10186e-97	0.437755	0.246	0.018	3.62412e-93	gc_B_MKI67	MFHAS1
NUTF2	1.30483e-97	1.13254	0.75	0.239	4.29171e-93	gc_B_MKI67	NUTF2
YWHAE	1.54267e-97	1.3449	0.875	0.402	5.07401e-93	gc_B_MKI67	YWHAE
COMMD4	1.9563e-97	0.816131	0.576	0.13	6.43446e-93	gc_B_MKI67	COMMD4
GSTP1	8.24684e-97	1.59005	0.977	0.587	2.71247e-92	gc_B_MKI67	GSTP1
LINC00493	1.19629e-96	0.55286	0.443	0.062	3.93471e-92	gc_B_MKI67	LINC00493
FAM111A	1.39687e-96	0.675147	0.455	0.071	4.59443e-92	gc_B_MKI67	FAM111A
PRPF38A	1.40496e-96	0.767409	0.561	0.111	4.62105e-92	gc_B_MKI67	PRPF38A
ZFP36L2	1.62111e-96	-3.04949	0.227	0.835	5.33198e-92	gc_B_MKI67	ZFP36L2
JUN	4.65551e-96	-3.57085	0.277	0.838	1.53124e-91	gc_B_MKI67	JUN
LIMD2	6.17595e-96	1.47484	0.97	0.484	2.03133e-91	gc_B_MKI67	LIMD2
POLD4	8.27108e-96	1.44843	0.973	0.588	2.72044e-91	gc_B_MKI67	POLD4
PSMB3	8.67005e-96	1.31705	0.92	0.48	2.85167e-91	gc_B_MKI67	PSMB3
MATR3	9.9466e-96	0.677028	0.481	0.074	3.27153e-91	gc_B_MKI67	MATR3
RQCD1	1.1696e-95	0.443715	0.25	0.019	3.84692e-91	gc_B_MKI67	RQCD1
DCAF12	1.77062e-95	0.685422	0.413	0.066	5.82374e-91	gc_B_MKI67	DCAF12
RPS16	2.05507e-95	1.42847	0.996	0.95	6.75932e-91	gc_B_MKI67	RPS16
CKAP2	2.27651e-95	0.821203	0.481	0.082	7.48768e-91	gc_B_MKI67	CKAP2
RNASEH2C	3.35032e-95	1.16618	0.792	0.288	1.10195e-90	gc_B_MKI67	RNASEH2C
CAMK1	3.64897e-95	0.451574	0.235	0.017	1.20018e-90	gc_B_MKI67	CAMK1
TAF9	7.86829e-95	1.10225	0.727	0.218	2.58796e-90	gc_B_MKI67	TAF9
CDC6	8.75215e-95	0.426243	0.239	0.018	2.87867e-90	gc_B_MKI67	CDC6
TIMELESS	1.0076e-94	0.443198	0.242	0.018	3.3141e-90	gc_B_MKI67	TIMELESS
PPP1CC	1.24555e-94	1.34535	0.894	0.413	4.09674e-90	gc_B_MKI67	PPP1CC
SRP9	1.60273e-94	1.26446	0.864	0.353	5.27155e-90	gc_B_MKI67	SRP9
EIF4A1	1.71808e-94	1.55252	0.822	0.291	5.65095e-90	gc_B_MKI67	EIF4A1
C1orf86	3.86572e-94	0.466247	0.375	0.046	1.27147e-89	gc_B_MKI67	C1orf86
HLA-DMB	1.75542e-93	1.20262	0.89	0.266	5.77375e-89	gc_B_MKI67	HLA-DMB
HSPB11	3.23244e-93	1.04103	0.693	0.204	1.06318e-88	gc_B_MKI67	HSPB11
COX6C	4.66254e-93	1.3422	0.962	0.621	1.53355e-88	gc_B_MKI67	COX6C
GSTZ1	5.52352e-93	0.616298	0.375	0.052	1.81674e-88	gc_B_MKI67	GSTZ1
CAPZB	6.64747e-93	1.28018	0.909	0.412	2.18642e-88	gc_B_MKI67	CAPZB
RBM27	1.36431e-92	0.527091	0.375	0.048	4.48735e-88	gc_B_MKI67	RBM27
WASH4P	2.26931e-92	0.428119	0.246	0.019	7.46397e-88	gc_B_MKI67	WASH4P
THOC7	3.13319e-92	0.916175	0.682	0.191	1.03054e-87	gc_B_MKI67	THOC7
POLR3K	4.76782e-92	0.787891	0.542	0.11	1.56818e-87	gc_B_MKI67	POLR3K
ESD	5.80645e-92	0.899299	0.636	0.152	1.9098e-87	gc_B_MKI67	ESD
MMS22L	5.86668e-92	0.416254	0.239	0.019	1.92961e-87	gc_B_MKI67	MMS22L
TRAPPC1	1.11707e-91	1.23431	0.905	0.413	3.67414e-87	gc_B_MKI67	TRAPPC1
HNRNPF	1.73041e-91	1.40772	0.905	0.45	5.6915e-87	gc_B_MKI67	HNRNPF
SUPT16H	2.74288e-91	0.808175	0.583	0.123	9.02162e-87	gc_B_MKI67	SUPT16H
RPL7	2.80245e-91	1.73582	0.996	0.836	9.21755e-87	gc_B_MKI67	RPL7
THRAP3	5.00343e-91	1.23585	0.856	0.336	1.64568e-86	gc_B_MKI67	THRAP3
HNRNPR	6.54814e-91	1.12588	0.803	0.277	2.15375e-86	gc_B_MKI67	HNRNPR
PPP4C	6.61294e-91	1.16501	0.811	0.296	2.17506e-86	gc_B_MKI67	PPP4C
RBBP4	1.21313e-90	1.27495	0.86	0.37	3.99009e-86	gc_B_MKI67	RBBP4
NDUFA4	1.24836e-90	1.29332	0.966	0.69	4.10597e-86	gc_B_MKI67	NDUFA4
UCP2	2.01454e-90	1.43979	0.943	0.431	6.62601e-86	gc_B_MKI67	UCP2
COX5A	2.81457e-90	1.33643	0.928	0.561	9.2574e-86	gc_B_MKI67	COX5A
SEPHS2	3.47833e-90	0.798144	0.538	0.111	1.14406e-85	gc_B_MKI67	SEPHS2
ZNF106	4.29303e-90	0.773368	0.591	0.129	1.41202e-85	gc_B_MKI67	ZNF106
RASGRP3	4.54804e-90	0.942562	0.629	0.162	1.4959e-85	gc_B_MKI67	RASGRP3
CYB5B	4.56706e-90	0.691978	0.511	0.096	1.50215e-85	gc_B_MKI67	CYB5B
TMSB4X	5.92316e-90	1.39555	1	0.977	1.94819e-85	gc_B_MKI67	TMSB4X
DBF4	9.0446e-90	0.7154	0.481	0.089	2.97486e-85	gc_B_MKI67	DBF4
WAPAL	9.87928e-90	0.493116	0.299	0.031	3.24939e-85	gc_B_MKI67	WAPAL
POLD3	1.56835e-89	0.413245	0.254	0.022	5.15847e-85	gc_B_MKI67	POLD3
TSC22D3	1.8531e-89	-2.12998	0.799	0.944	6.09504e-85	gc_B_MKI67	TSC22D3
SERBP1	2.17108e-89	1.36224	0.917	0.47	7.14089e-85	gc_B_MKI67	SERBP1
NUP37	2.55715e-89	0.628456	0.413	0.066	8.41073e-85	gc_B_MKI67	NUP37
HLA-DQA2	2.88643e-89	0.99671	0.723	0.183	9.49376e-85	gc_B_MKI67	HLA-DQA2
MAPRE1	3.87917e-89	0.877328	0.644	0.168	1.2759e-84	gc_B_MKI67	MAPRE1
NPM1	7.2508e-89	1.4132	0.992	0.851	2.38486e-84	gc_B_MKI67	NPM1
DPP3	7.40453e-89	0.501724	0.348	0.047	2.43543e-84	gc_B_MKI67	DPP3
MTCH2	9.34571e-89	0.806395	0.549	0.124	3.0739e-84	gc_B_MKI67	MTCH2
BTF3	1.60812e-88	1.21895	0.992	0.864	5.28926e-84	gc_B_MKI67	BTF3
PSMG2	4.40849e-88	0.990975	0.735	0.234	1.45e-83	gc_B_MKI67	PSMG2
MRPL13	4.47774e-88	0.796811	0.53	0.113	1.47277e-83	gc_B_MKI67	MRPL13
CCDC88A	4.64203e-88	0.850094	0.489	0.101	1.52681e-83	gc_B_MKI67	CCDC88A
LIG1	5.93937e-88	0.708022	0.417	0.068	1.95352e-83	gc_B_MKI67	LIG1
CYB561A3	6.7638e-88	0.778625	0.602	0.125	2.22468e-83	gc_B_MKI67	CYB561A3
DNAJC8	9.81827e-88	1.04783	0.788	0.271	3.22933e-83	gc_B_MKI67	DNAJC8
DDT	1.15528e-87	1.20966	0.784	0.301	3.79983e-83	gc_B_MKI67	DDT
PMVK	1.19093e-87	0.992684	0.629	0.18	3.9171e-83	gc_B_MKI67	PMVK
EIF3I	1.23178e-87	1.20021	0.867	0.376	4.05146e-83	gc_B_MKI67	EIF3I
SWAP70	1.55465e-87	0.97991	0.871	0.251	5.11339e-83	gc_B_MKI67	SWAP70
SNRNP40	1.74528e-87	0.756719	0.576	0.129	5.74041e-83	gc_B_MKI67	SNRNP40
FKBP3	2.00305e-87	0.950177	0.595	0.151	6.58825e-83	gc_B_MKI67	FKBP3
FERMT3	2.52511e-87	1.02267	0.697	0.208	8.30533e-83	gc_B_MKI67	FERMT3
RPL4	3.15529e-87	1.20254	0.996	0.915	1.03781e-82	gc_B_MKI67	RPL4
EED	3.25847e-87	0.533623	0.413	0.063	1.07174e-82	gc_B_MKI67	EED
DCTPP1	3.40876e-87	0.826791	0.489	0.095	1.12118e-82	gc_B_MKI67	DCTPP1
NRM	3.80836e-87	0.470797	0.299	0.033	1.25261e-82	gc_B_MKI67	NRM
AP2S1	4.00937e-87	1.03327	0.761	0.264	1.31872e-82	gc_B_MKI67	AP2S1
ABRACL	4.14147e-87	1.20713	0.723	0.247	1.36217e-82	gc_B_MKI67	ABRACL
FAM45A	5.70016e-87	0.973137	0.508	0.113	1.87484e-82	gc_B_MKI67	FAM45A
MRPL27	6.22533e-87	0.893515	0.606	0.157	2.04757e-82	gc_B_MKI67	MRPL27
GDI2	7.16306e-87	1.25093	0.928	0.492	2.356e-82	gc_B_MKI67	GDI2
MGME1	8.28495e-87	0.49372	0.367	0.05	2.725e-82	gc_B_MKI67	MGME1
SETD5-AS1	1.16079e-86	0.454211	0.379	0.05	3.81795e-82	gc_B_MKI67	SETD5-AS1
DBNL	1.2102e-86	1.05386	0.795	0.25	3.98047e-82	gc_B_MKI67	DBNL
ID2	2.37087e-86	0.62057	0.288	0.031	7.79804e-82	gc_B_MKI67	ID2
PIN1	3.32982e-86	0.975326	0.674	0.204	1.09521e-81	gc_B_MKI67	PIN1
C21orf33	5.16742e-86	0.410133	0.265	0.025	1.69962e-81	gc_B_MKI67	C21orf33
PPP2CA	7.95867e-86	1.0724	0.814	0.31	2.61769e-81	gc_B_MKI67	PPP2CA
ACTL6A	9.43538e-86	0.664235	0.451	0.082	3.10339e-81	gc_B_MKI67	ACTL6A
PDZD11	9.62863e-86	0.634032	0.42	0.072	3.16695e-81	gc_B_MKI67	PDZD11
ANP32A	1.08354e-85	1.02559	0.811	0.29	3.56387e-81	gc_B_MKI67	ANP32A
LARP7	1.09337e-85	0.759354	0.587	0.133	3.5962e-81	gc_B_MKI67	LARP7
RNGTT	1.15446e-85	0.693905	0.545	0.114	3.79712e-81	gc_B_MKI67	RNGTT
HLA-C	1.71449e-85	-2.03354	0.754	0.943	5.63914e-81	gc_B_MKI67	HLA-C
PRPSAP2	2.02253e-85	0.853246	0.595	0.148	6.65231e-81	gc_B_MKI67	PRPSAP2
THOC6	2.09467e-85	0.568397	0.432	0.073	6.88959e-81	gc_B_MKI67	THOC6
SNTA1	2.1706e-85	0.580422	0.326	0.042	7.1393e-81	gc_B_MKI67	SNTA1
JUND	2.31096e-85	-2.44362	0.455	0.889	7.60098e-81	gc_B_MKI67	JUND
CTNNAL1	3.75179e-85	0.543977	0.322	0.042	1.234e-80	gc_B_MKI67	CTNNAL1
MDH1	4.3862e-85	1.18475	0.795	0.322	1.44267e-80	gc_B_MKI67	MDH1
TADA3	5.32018e-85	0.77304	0.561	0.131	1.74986e-80	gc_B_MKI67	TADA3
GGCT	8.31258e-85	0.628428	0.424	0.071	2.73409e-80	gc_B_MKI67	GGCT
EAF2	8.68064e-85	1.22112	0.867	0.396	2.85515e-80	gc_B_MKI67	EAF2
YWHAQ	8.77228e-85	1.26078	0.864	0.405	2.88529e-80	gc_B_MKI67	YWHAQ
ATP6V1E1	1.98802e-84	0.827463	0.614	0.152	6.53879e-80	gc_B_MKI67	ATP6V1E1
HNRNPK	2.38917e-84	1.23604	0.977	0.636	7.85823e-80	gc_B_MKI67	HNRNPK
KLF2	3.23003e-84	-3.64854	0.042	0.716	1.06239e-79	gc_B_MKI67	KLF2
CD53	9.13536e-84	1.47373	0.958	0.569	3.00471e-79	gc_B_MKI67	CD53
TXN2	1.21946e-83	0.925503	0.697	0.218	4.01091e-79	gc_B_MKI67	TXN2
SIVA1	1.91579e-83	1.29898	0.807	0.364	6.30124e-79	gc_B_MKI67	SIVA1
SNRPD3	2.01266e-83	1.1883	0.811	0.329	6.61984e-79	gc_B_MKI67	SNRPD3
UBE2N	2.69143e-83	1.05784	0.86	0.321	8.85238e-79	gc_B_MKI67	UBE2N
TXNDC9	6.00196e-83	0.625591	0.466	0.091	1.9741e-78	gc_B_MKI67	TXNDC9
P2RX5	6.51154e-83	0.78112	0.561	0.121	2.14171e-78	gc_B_MKI67	P2RX5
TMED8	1.55816e-82	0.578814	0.47	0.083	5.12493e-78	gc_B_MKI67	TMED8
RPSAP58	1.82994e-82	0.528397	0.47	0.08	6.01885e-78	gc_B_MKI67	RPSAP58
PA2G4	2.21275e-82	1.16936	0.761	0.283	7.27796e-78	gc_B_MKI67	PA2G4
SRP14	2.21484e-82	1.16025	0.992	0.785	7.28482e-78	gc_B_MKI67	SRP14
RAD51C	2.50815e-82	0.623247	0.417	0.072	8.24955e-78	gc_B_MKI67	RAD51C
SF3B5	4.85164e-82	1.13053	0.875	0.419	1.59575e-77	gc_B_MKI67	SF3B5
NDUFA9	5.07455e-82	0.564703	0.371	0.054	1.66907e-77	gc_B_MKI67	NDUFA9
FDPS	5.83619e-82	1.15141	0.754	0.303	1.91958e-77	gc_B_MKI67	FDPS
SUMO3	6.36621e-82	0.855262	0.652	0.182	2.09391e-77	gc_B_MKI67	SUMO3
PPIL3	1.19198e-81	0.651124	0.466	0.091	3.92056e-77	gc_B_MKI67	PPIL3
RPL39L	1.22077e-81	0.835885	0.511	0.124	4.01523e-77	gc_B_MKI67	RPL39L
LAT2	1.65621e-81	0.939538	0.773	0.223	5.44744e-77	gc_B_MKI67	LAT2
SET	1.79262e-81	1.25662	0.951	0.515	5.89612e-77	gc_B_MKI67	SET
UBE2A	3.4158e-81	0.964442	0.742	0.254	1.12349e-76	gc_B_MKI67	UBE2A
BFSP2	4.51322e-81	0.641996	0.379	0.063	1.48444e-76	gc_B_MKI67	BFSP2
ZFP36	4.52472e-81	-2.74866	0.371	0.827	1.48823e-76	gc_B_MKI67	ZFP36
PHAX	5.93074e-81	0.785956	0.519	0.118	1.95068e-76	gc_B_MKI67	PHAX
CCT8	6.00358e-81	1.12622	0.856	0.389	1.97464e-76	gc_B_MKI67	CCT8
VPREB3	6.52572e-81	1.40218	0.958	0.423	2.14637e-76	gc_B_MKI67	VPREB3
PSMB2	8.7085e-81	1.19526	0.78	0.326	2.86431e-76	gc_B_MKI67	PSMB2
C19orf60	1.55493e-80	0.521755	0.386	0.057	5.11433e-76	gc_B_MKI67	C19orf60
ANAPC11	1.72093e-80	1.21739	0.841	0.418	5.66032e-76	gc_B_MKI67	ANAPC11
DYNLL1	2.47145e-80	1.55074	0.879	0.498	8.12885e-76	gc_B_MKI67	DYNLL1
MRPL35	3.14676e-80	0.5734	0.383	0.064	1.035e-75	gc_B_MKI67	MRPL35
PARK7	3.96838e-80	1.15687	0.924	0.546	1.30524e-75	gc_B_MKI67	PARK7
RPS11	4.06636e-80	1.34187	0.996	0.883	1.33747e-75	gc_B_MKI67	RPS11
JTB	5.2418e-80	0.891216	0.644	0.169	1.72408e-75	gc_B_MKI67	JTB
C1D	1.49735e-79	0.775162	0.617	0.163	4.92494e-75	gc_B_MKI67	C1D
NFYB	1.83621e-79	0.708839	0.424	0.08	6.03946e-75	gc_B_MKI67	NFYB
RMDN1	1.88919e-79	0.614826	0.439	0.082	6.21374e-75	gc_B_MKI67	RMDN1
MRPL28	2.53551e-79	0.697481	0.549	0.132	8.33956e-75	gc_B_MKI67	MRPL28
PSMA5	2.61922e-79	1.08525	0.75	0.296	8.61487e-75	gc_B_MKI67	PSMA5
DCP2	3.22105e-79	0.598372	0.5	0.1	1.05944e-74	gc_B_MKI67	DCP2
WBSCR22	4.40654e-79	0.48851	0.36	0.051	1.44936e-74	gc_B_MKI67	WBSCR22
CHMP1A	5.25733e-79	0.486689	0.371	0.058	1.72919e-74	gc_B_MKI67	CHMP1A
TP53	5.42333e-79	0.464972	0.337	0.046	1.78379e-74	gc_B_MKI67	TP53
POLR2J3	7.15978e-79	0.610162	0.413	0.071	2.35492e-74	gc_B_MKI67	POLR2J3
UNG	7.55845e-79	0.498914	0.284	0.034	2.48605e-74	gc_B_MKI67	UNG
STX7	1.04758e-78	0.773522	0.742	0.212	3.4456e-74	gc_B_MKI67	STX7
CCT2	1.30861e-78	1.00547	0.708	0.23	4.30415e-74	gc_B_MKI67	CCT2
VPS29	2.79964e-78	1.04067	0.758	0.296	9.20828e-74	gc_B_MKI67	VPS29
KIAA0226L	4.14222e-78	0.505333	0.284	0.032	1.36242e-73	gc_B_MKI67	KIAA0226L
UQCRH	8.55951e-78	1.14032	0.977	0.738	2.81531e-73	gc_B_MKI67	UQCRH
PTPN18	1.49961e-77	0.858016	0.542	0.126	4.93236e-73	gc_B_MKI67	PTPN18
CD180	1.93935e-77	0.724703	0.481	0.1	6.37872e-73	gc_B_MKI67	CD180
MRPS11	2.47822e-77	0.688652	0.511	0.122	8.15113e-73	gc_B_MKI67	MRPS11
AP2M1	2.48495e-77	0.937505	0.739	0.267	8.17325e-73	gc_B_MKI67	AP2M1
UBE2I	3.50864e-77	1.16682	0.871	0.433	1.15403e-72	gc_B_MKI67	UBE2I
POLR2J	4.09626e-77	1.01284	0.78	0.327	1.3473e-72	gc_B_MKI67	POLR2J
COX6B1	1.10178e-76	1.09462	0.973	0.697	3.62388e-72	gc_B_MKI67	COX6B1
PSMD14	1.11813e-76	0.82212	0.568	0.156	3.67766e-72	gc_B_MKI67	PSMD14
TXNDC17	1.17053e-76	0.928463	0.678	0.239	3.85e-72	gc_B_MKI67	TXNDC17
RBM14	1.18681e-76	0.469518	0.375	0.059	3.90353e-72	gc_B_MKI67	RBM14
CD2BP2	1.29249e-76	0.840293	0.652	0.198	4.25112e-72	gc_B_MKI67	CD2BP2
HNRNPH3	1.41501e-76	0.920031	0.788	0.277	4.65412e-72	gc_B_MKI67	HNRNPH3
EIF3F	1.83997e-76	1.07511	0.985	0.639	6.05184e-72	gc_B_MKI67	EIF3F
HNRNPH1	2.16352e-76	1.15362	0.833	0.341	7.11604e-72	gc_B_MKI67	HNRNPH1
DERA	3.34285e-76	0.74474	0.447	0.094	1.0995e-71	gc_B_MKI67	DERA
HIST2H2AC	3.42348e-76	0.478667	0.265	0.031	1.12602e-71	gc_B_MKI67	HIST2H2AC
EIF5A	3.72627e-76	1.31187	0.871	0.458	1.22561e-71	gc_B_MKI67	EIF5A
ANAPC15	3.8841e-76	0.781956	0.542	0.142	1.27752e-71	gc_B_MKI67	ANAPC15
FTL	4.74987e-76	-1.2617	0.955	0.982	1.56228e-71	gc_B_MKI67	FTL
FAM192A	6.56803e-76	0.666293	0.523	0.121	2.16029e-71	gc_B_MKI67	FAM192A
NEDD8	7.27428e-76	1.0683	0.879	0.444	2.39258e-71	gc_B_MKI67	NEDD8
GNG5	7.79677e-76	1.10572	0.939	0.56	2.56444e-71	gc_B_MKI67	GNG5
IGJ	7.81911e-76	-3.09617	0.648	0.15	2.57178e-71	gc_B_MKI67	IGJ
UBA52	9.04941e-76	1.11181	1	0.913	2.97644e-71	gc_B_MKI67	UBA52
DCLRE1C	9.41799e-76	0.492981	0.352	0.053	3.09767e-71	gc_B_MKI67	DCLRE1C
RPSA	1.17758e-75	1.1869	0.996	0.919	3.87317e-71	gc_B_MKI67	RPSA
RPL27A	1.65894e-75	1.69098	0.97	0.772	5.45643e-71	gc_B_MKI67	RPL27A
CDC25B	3.14986e-75	0.668324	0.36	0.06	1.03602e-70	gc_B_MKI67	CDC25B
PCBP2	3.63794e-75	1.08351	0.92	0.464	1.19655e-70	gc_B_MKI67	PCBP2
TXNIP	5.04371e-75	-2.62016	0.133	0.738	1.65893e-70	gc_B_MKI67	TXNIP
ZFAND6	7.4141e-75	0.922351	0.746	0.248	2.43857e-70	gc_B_MKI67	ZFAND6
APLP2	7.68427e-75	0.710486	0.485	0.105	2.52743e-70	gc_B_MKI67	APLP2
ITGB1BP1	8.76713e-75	0.563315	0.455	0.091	2.8836e-70	gc_B_MKI67	ITGB1BP1
ILF2	1.70338e-74	1.09222	0.807	0.371	5.60258e-70	gc_B_MKI67	ILF2
SHKBP1	1.77602e-74	0.774967	0.644	0.19	5.84151e-70	gc_B_MKI67	SHKBP1
UBE2D3	3.06475e-74	1.08282	0.943	0.541	1.00803e-69	gc_B_MKI67	UBE2D3
COX11	3.29953e-74	0.588203	0.485	0.105	1.08525e-69	gc_B_MKI67	COX11
ABI3	3.32892e-74	0.668384	0.515	0.105	1.09491e-69	gc_B_MKI67	ABI3
MGEA5	3.54221e-74	0.569512	0.428	0.074	1.16507e-69	gc_B_MKI67	MGEA5
VBP1	3.97067e-74	0.719668	0.568	0.151	1.30599e-69	gc_B_MKI67	VBP1
LYRM4	4.89791e-74	0.577979	0.42	0.08	1.61097e-69	gc_B_MKI67	LYRM4
MFAP1	6.41469e-74	0.639728	0.439	0.086	2.10986e-69	gc_B_MKI67	MFAP1
COX17	8.48392e-74	1.08415	0.852	0.403	2.79045e-69	gc_B_MKI67	COX17
VGLL4	1.89276e-73	0.572531	0.417	0.077	6.22547e-69	gc_B_MKI67	VGLL4
COX6A1	2.13312e-73	1.13337	0.947	0.718	7.01605e-69	gc_B_MKI67	COX6A1
CEP135	3.02373e-73	0.480192	0.352	0.055	9.94537e-69	gc_B_MKI67	CEP135
CHTOP	3.3241e-73	0.72338	0.534	0.132	1.09333e-68	gc_B_MKI67	CHTOP
TOPBP1	3.83432e-73	0.483291	0.333	0.05	1.26115e-68	gc_B_MKI67	TOPBP1
SRSF2	4.40747e-73	1.17959	0.905	0.499	1.44966e-68	gc_B_MKI67	SRSF2
XPNPEP1	4.6747e-73	0.481738	0.364	0.061	1.53756e-68	gc_B_MKI67	XPNPEP1
SLC25A6	7.79411e-73	1.01486	0.989	0.848	2.56356e-68	gc_B_MKI67	SLC25A6
TPRKB	8.50038e-73	0.651467	0.549	0.143	2.79586e-68	gc_B_MKI67	TPRKB
PRKDC	9.24066e-73	0.738282	0.598	0.156	3.03934e-68	gc_B_MKI67	PRKDC
RPL28	1.0825e-72	0.93277	1	0.989	3.56045e-68	gc_B_MKI67	RPL28
FAM76B	1.30864e-72	0.581299	0.413	0.075	4.30424e-68	gc_B_MKI67	FAM76B
PNRC1	1.58267e-72	-1.95694	0.28	0.834	5.20555e-68	gc_B_MKI67	PNRC1
IER3IP1-1	1.75328e-72	0.447255	0.333	0.048	5.76672e-68	gc_B_MKI67	IER3IP1-1
NIP7	3.14046e-72	0.437487	0.39	0.067	1.03293e-67	gc_B_MKI67	NIP7
ILK	1.18704e-71	0.735084	0.511	0.124	3.90429e-67	gc_B_MKI67	ILK
COX7A2	1.23598e-71	1.04927	0.955	0.672	4.06526e-67	gc_B_MKI67	COX7A2
RUVBL2	1.29715e-71	0.815197	0.542	0.151	4.26646e-67	gc_B_MKI67	RUVBL2
GMPS	3.02402e-71	0.505276	0.383	0.067	9.94631e-67	gc_B_MKI67	GMPS
RAB8A	3.97336e-71	0.843935	0.686	0.243	1.30688e-66	gc_B_MKI67	RAB8A
ADSL	4.2346e-71	0.689997	0.462	0.105	1.3928e-66	gc_B_MKI67	ADSL
HIST1H3B	5.08441e-71	0.455817	0.14	0.007	1.67231e-66	gc_B_MKI67	HIST1H3B
NSMCE1	5.66247e-71	0.718356	0.553	0.149	1.86244e-66	gc_B_MKI67	NSMCE1
TRA2B	5.79569e-71	1.03897	0.909	0.436	1.90626e-66	gc_B_MKI67	TRA2B
GNAI3	6.48604e-71	0.734517	0.568	0.152	2.13332e-66	gc_B_MKI67	GNAI3
NRD1	6.84529e-71	0.430032	0.288	0.037	2.25148e-66	gc_B_MKI67	NRD1
RHOA	7.61314e-71	1.07919	0.973	0.696	2.50404e-66	gc_B_MKI67	RHOA
SMC1A	9.43258e-71	0.71299	0.508	0.121	3.10247e-66	gc_B_MKI67	SMC1A
HSBP1	1.28957e-70	0.940242	0.701	0.26	4.24152e-66	gc_B_MKI67	HSBP1
MINOS1	2.08052e-70	1.03941	0.826	0.39	6.84304e-66	gc_B_MKI67	MINOS1
EIF4H	3.01089e-70	0.895549	0.727	0.263	9.90312e-66	gc_B_MKI67	EIF4H
WDR34	3.12158e-70	0.64537	0.383	0.07	1.02672e-65	gc_B_MKI67	WDR34
UCHL3	3.42202e-70	0.484906	0.303	0.045	1.12554e-65	gc_B_MKI67	UCHL3
MYO1E	3.44133e-70	0.527716	0.462	0.092	1.13189e-65	gc_B_MKI67	MYO1E
TALDO1	4.8131e-70	1.07563	0.795	0.374	1.58308e-65	gc_B_MKI67	TALDO1
HMGN3	4.86509e-70	1.09748	0.83	0.431	1.60018e-65	gc_B_MKI67	HMGN3
RPS6	5.13862e-70	1.06241	0.996	0.976	1.69014e-65	gc_B_MKI67	RPS6
EMC9	5.40773e-70	0.505006	0.337	0.056	1.77866e-65	gc_B_MKI67	EMC9
ASH2L	1.21632e-69	0.417987	0.326	0.049	4.00061e-65	gc_B_MKI67	ASH2L
TERF2	1.94873e-69	0.673972	0.439	0.091	6.40957e-65	gc_B_MKI67	TERF2
RPL10A	2.98607e-69	1.06195	0.996	0.953	9.82149e-65	gc_B_MKI67	RPL10A
PSMD9	4.18864e-69	0.847757	0.602	0.194	1.37768e-64	gc_B_MKI67	PSMD9
NDUFB3	4.31096e-69	1.02625	0.75	0.332	1.41792e-64	gc_B_MKI67	NDUFB3
EIF3L	5.16561e-69	1.05609	0.947	0.56	1.69902e-64	gc_B_MKI67	EIF3L
CCT6A	8.6405e-69	0.86911	0.678	0.224	2.84195e-64	gc_B_MKI67	CCT6A
RBMX	1.2173e-68	1.00198	0.89	0.417	4.00382e-64	gc_B_MKI67	RBMX
ADA	1.25833e-68	0.659273	0.447	0.103	4.13879e-64	gc_B_MKI67	ADA
NOP56	1.32236e-68	0.711385	0.568	0.154	4.34936e-64	gc_B_MKI67	NOP56
TAPSAR1	1.41211e-68	0.428468	0.352	0.055	4.64458e-64	gc_B_MKI67	TAPSAR1
MIS18BP1	2.44767e-68	0.863305	0.682	0.224	8.05063e-64	gc_B_MKI67	MIS18BP1
CEP57	2.64222e-68	0.770281	0.621	0.188	8.69051e-64	gc_B_MKI67	CEP57
CNN2	3.16195e-68	0.918735	0.746	0.267	1.04e-63	gc_B_MKI67	CNN2
HADH	8.34078e-68	0.62685	0.466	0.11	2.74336e-63	gc_B_MKI67	HADH
AHSA1	8.94019e-68	0.709716	0.568	0.158	2.94052e-63	gc_B_MKI67	AHSA1
SNRPC	1.46698e-67	0.954199	0.708	0.283	4.82506e-63	gc_B_MKI67	SNRPC
UQCR10	1.55601e-67	1.067	0.879	0.504	5.11788e-63	gc_B_MKI67	UQCR10
XPO1	1.69201e-67	0.658971	0.485	0.11	5.56519e-63	gc_B_MKI67	XPO1
CHRAC1	3.04831e-67	0.523908	0.447	0.094	1.00262e-62	gc_B_MKI67	CHRAC1
MRPS6	3.1597e-67	0.907249	0.72	0.282	1.03926e-62	gc_B_MKI67	MRPS6
PPP1R7	4.33231e-67	0.791419	0.625	0.209	1.42494e-62	gc_B_MKI67	PPP1R7
BLOC1S6	5.18801e-67	0.736516	0.561	0.159	1.70639e-62	gc_B_MKI67	BLOC1S6
RPP30	5.81115e-67	0.532517	0.413	0.085	1.91134e-62	gc_B_MKI67	RPP30
UBE2V2	6.66249e-67	0.755529	0.549	0.152	2.19136e-62	gc_B_MKI67	UBE2V2
BLMH	8.2342e-67	0.445129	0.284	0.041	2.70831e-62	gc_B_MKI67	BLMH
JUNB	1.09127e-66	-2.47407	0.602	0.866	3.58929e-62	gc_B_MKI67	JUNB
BABAM1	1.18853e-66	0.729455	0.553	0.16	3.9092e-62	gc_B_MKI67	BABAM1
MMADHC	1.22889e-66	0.887854	0.727	0.297	4.04194e-62	gc_B_MKI67	MMADHC
TMEM123	1.88819e-66	0.860478	0.769	0.298	6.21046e-62	gc_B_MKI67	TMEM123
INO80C	2.14051e-66	0.502437	0.375	0.071	7.04036e-62	gc_B_MKI67	INO80C
RAE1	3.10377e-66	0.453914	0.36	0.064	1.02086e-61	gc_B_MKI67	RAE1
PXK	4.2888e-66	0.684933	0.523	0.126	1.41063e-61	gc_B_MKI67	PXK
RPL13A	5.23443e-66	1.62527	0.973	0.846	1.72166e-61	gc_B_MKI67	RPL13A
SCARB1	6.28293e-66	0.446691	0.261	0.035	2.06652e-61	gc_B_MKI67	SCARB1
RALY	7.09464e-66	1.01134	0.83	0.405	2.3335e-61	gc_B_MKI67	RALY
CCDC115	7.56181e-66	0.556826	0.451	0.096	2.48715e-61	gc_B_MKI67	CCDC115
RAD1	8.86328e-66	0.450848	0.322	0.052	2.91522e-61	gc_B_MKI67	RAD1
MT-ND4L	9.74544e-66	-1.95721	0.413	0.859	3.20537e-61	gc_B_MKI67	MT-ND4L
CDK2AP2	1.19891e-65	1.01828	0.777	0.371	3.94333e-61	gc_B_MKI67	CDK2AP2
PSMD4	1.38339e-65	0.860856	0.746	0.302	4.5501e-61	gc_B_MKI67	PSMD4
HNRNPA0	1.51441e-65	1.05665	0.917	0.526	4.98104e-61	gc_B_MKI67	HNRNPA0
PTRHD1	3.66915e-65	0.671273	0.568	0.158	1.20682e-60	gc_B_MKI67	PTRHD1
LSM2	4.10429e-65	0.832967	0.712	0.269	1.34994e-60	gc_B_MKI67	LSM2
LIMS1	4.51867e-65	0.72597	0.523	0.145	1.48624e-60	gc_B_MKI67	LIMS1
IDH3B	4.68697e-65	0.604351	0.534	0.141	1.54159e-60	gc_B_MKI67	IDH3B
PSMB1	5.26729e-65	1.00727	0.905	0.566	1.73247e-60	gc_B_MKI67	PSMB1
TOP1	6.82178e-65	0.984626	0.727	0.308	2.24375e-60	gc_B_MKI67	TOP1
MTPN	8.67211e-65	0.798037	0.716	0.228	2.85234e-60	gc_B_MKI67	MTPN
HINT1	8.69875e-65	0.930803	0.977	0.8	2.86111e-60	gc_B_MKI67	HINT1
TBCA	8.74703e-65	1.01901	0.89	0.514	2.87698e-60	gc_B_MKI67	TBCA
CKAP5	9.85352e-65	0.581518	0.318	0.053	3.24092e-60	gc_B_MKI67	CKAP5
PSMB7	1.03918e-64	0.856155	0.659	0.235	3.41797e-60	gc_B_MKI67	PSMB7
HAT1	1.05735e-64	0.852713	0.564	0.175	3.47774e-60	gc_B_MKI67	HAT1
POP7	1.22255e-64	0.620026	0.443	0.108	4.02108e-60	gc_B_MKI67	POP7
RCC2	1.37704e-64	0.42339	0.322	0.052	4.52924e-60	gc_B_MKI67	RCC2
CDC42	1.44178e-64	0.981608	0.89	0.414	4.74214e-60	gc_B_MKI67	CDC42
RPS24	2.57278e-64	0.904466	1	0.975	8.46212e-60	gc_B_MKI67	RPS24
ENY2	2.64501e-64	0.988413	0.792	0.374	8.6997e-60	gc_B_MKI67	ENY2
MS4A1	3.11107e-64	1.20752	0.977	0.467	1.02326e-59	gc_B_MKI67	MS4A1
EIF3M	4.21255e-64	0.91389	0.807	0.365	1.38555e-59	gc_B_MKI67	EIF3M
FAM49B	4.44646e-64	0.786934	0.777	0.274	1.46249e-59	gc_B_MKI67	FAM49B
NCF1	5.06747e-64	0.92534	0.814	0.348	1.66674e-59	gc_B_MKI67	NCF1
VPS25	6.93222e-64	0.648243	0.481	0.126	2.28008e-59	gc_B_MKI67	VPS25
WDR83OS	7.75256e-64	0.682295	0.591	0.17	2.5499e-59	gc_B_MKI67	WDR83OS
ACADM	7.89823e-64	0.736279	0.652	0.215	2.59781e-59	gc_B_MKI67	ACADM
PRIM1	7.93619e-64	0.41096	0.265	0.036	2.61029e-59	gc_B_MKI67	PRIM1
DPM1	8.98196e-64	0.641804	0.466	0.113	2.95426e-59	gc_B_MKI67	DPM1
CCT3	9.04698e-64	0.947573	0.723	0.289	2.97564e-59	gc_B_MKI67	CCT3
SARAF	1.05015e-63	-1.76447	0.061	0.645	3.45405e-59	gc_B_MKI67	SARAF
EIF3H	1.80249e-63	1.00758	0.936	0.6	5.92857e-59	gc_B_MKI67	EIF3H
SPINK2	2.05863e-63	0.666105	0.489	0.125	6.77105e-59	gc_B_MKI67	SPINK2
VAMP8	2.87299e-63	1.07876	0.803	0.412	9.44955e-59	gc_B_MKI67	VAMP8
BTF3L4	3.43337e-63	0.692704	0.606	0.187	1.12927e-58	gc_B_MKI67	BTF3L4
MT-RNR2	3.96763e-63	-2.18468	0.148	0.772	1.30499e-58	gc_B_MKI67	MT-RNR2
FAM207A	4.12964e-63	0.561274	0.443	0.105	1.35828e-58	gc_B_MKI67	FAM207A
FAM200B	8.12536e-63	0.422547	0.307	0.048	2.67251e-58	gc_B_MKI67	FAM200B
GPR18	8.88751e-63	0.509542	0.439	0.088	2.92319e-58	gc_B_MKI67	GPR18
COPS3	1.27791e-62	0.820928	0.542	0.164	4.20318e-58	gc_B_MKI67	COPS3
POLH	1.59941e-62	0.491243	0.284	0.043	5.26061e-58	gc_B_MKI67	POLH
SNRPA1	1.78416e-62	0.78319	0.644	0.221	5.86828e-58	gc_B_MKI67	SNRPA1
DDB2	1.91915e-62	0.418665	0.367	0.069	6.31228e-58	gc_B_MKI67	DDB2
ELP6	2.01957e-62	0.469038	0.405	0.089	6.64257e-58	gc_B_MKI67	ELP6
GTF2A2	2.01999e-62	0.868504	0.701	0.282	6.64396e-58	gc_B_MKI67	GTF2A2
NDUFA2	2.11101e-62	0.931942	0.784	0.386	6.94332e-58	gc_B_MKI67	NDUFA2
NDUFB2	2.23841e-62	0.952683	0.89	0.518	7.36234e-58	gc_B_MKI67	NDUFB2
IMMT	2.333e-62	0.577039	0.466	0.114	7.67346e-58	gc_B_MKI67	IMMT
TPM3	2.95928e-62	0.955396	0.89	0.439	9.73338e-58	gc_B_MKI67	TPM3
NFATC2IP	4.21224e-62	0.51953	0.458	0.107	1.38545e-57	gc_B_MKI67	NFATC2IP
LYPLA1	4.29594e-62	0.959423	0.663	0.25	1.41298e-57	gc_B_MKI67	LYPLA1
INIP	5.47032e-62	0.411906	0.322	0.054	1.79924e-57	gc_B_MKI67	INIP
PTBP1	5.47167e-62	0.761768	0.606	0.194	1.79969e-57	gc_B_MKI67	PTBP1
DNAJC7	6.04863e-62	0.751148	0.682	0.244	1.98946e-57	gc_B_MKI67	DNAJC7
SLTM	8.89076e-62	0.800157	0.716	0.259	2.92426e-57	gc_B_MKI67	SLTM
ARGLU1	9.83092e-62	0.929199	0.864	0.398	3.23349e-57	gc_B_MKI67	ARGLU1
PSMD8	9.86489e-62	0.974109	0.837	0.47	3.24466e-57	gc_B_MKI67	PSMD8
NDUFV2	1.04935e-61	0.945048	0.807	0.42	3.45141e-57	gc_B_MKI67	NDUFV2
MT-RNR1	1.17081e-61	-1.6876	0.144	0.761	3.8509e-57	gc_B_MKI67	MT-RNR1
DR1	1.36313e-61	0.490325	0.447	0.103	4.48348e-57	gc_B_MKI67	DR1
MRPL22	1.3689e-61	0.700384	0.557	0.178	4.50246e-57	gc_B_MKI67	MRPL22
NDUFA12	1.38142e-61	0.905273	0.735	0.329	4.54362e-57	gc_B_MKI67	NDUFA12
MED30	1.59574e-61	0.66009	0.617	0.184	5.24854e-57	gc_B_MKI67	MED30
RPL21	1.77837e-61	1.17324	0.992	0.946	5.84925e-57	gc_B_MKI67	RPL21
TMEM126B	2.00258e-61	0.483889	0.405	0.087	6.58669e-57	gc_B_MKI67	TMEM126B
RPL35	2.95615e-61	0.912776	0.996	0.954	9.72308e-57	gc_B_MKI67	RPL35
XRCC5	3.99898e-61	0.938931	0.792	0.352	1.3153e-56	gc_B_MKI67	XRCC5
PFDN4	4.06124e-61	0.559717	0.455	0.109	1.33578e-56	gc_B_MKI67	PFDN4
CAPN1	4.09723e-61	0.653274	0.538	0.156	1.34762e-56	gc_B_MKI67	CAPN1
NCAPH2	4.20139e-61	0.510437	0.333	0.062	1.38188e-56	gc_B_MKI67	NCAPH2
RPL23A	8.76592e-61	1.0688	0.992	0.944	2.8832e-56	gc_B_MKI67	RPL23A
COX5B	1.03196e-60	0.875995	0.955	0.643	3.39422e-56	gc_B_MKI67	COX5B
MAGOH	1.1669e-60	0.846462	0.689	0.266	3.83806e-56	gc_B_MKI67	MAGOH
RPL37A	2.30041e-60	1.06828	0.989	0.92	7.56629e-56	gc_B_MKI67	RPL37A
2024-09-07	2.54258e-60	0.858564	0.962	0.486	8.36281e-56	gc_B_MKI67	2024-09-07
RAP1B	2.62748e-60	0.982874	0.879	0.496	8.64203e-56	gc_B_MKI67	RAP1B
BID	3.44843e-60	0.65591	0.47	0.127	1.13422e-55	gc_B_MKI67	BID
EIF3E	3.95934e-60	1.0084	0.928	0.576	1.30227e-55	gc_B_MKI67	EIF3E
EIF3A	4.9264e-60	0.87497	0.765	0.341	1.62034e-55	gc_B_MKI67	EIF3A
LSM10	5.6389e-60	1.02398	0.708	0.322	1.85469e-55	gc_B_MKI67	LSM10
EHD4	7.10596e-60	0.564423	0.379	0.082	2.33722e-55	gc_B_MKI67	EHD4
EIF6	7.1302e-60	0.739865	0.648	0.223	2.34519e-55	gc_B_MKI67	EIF6
SSB	8.34734e-60	0.783579	0.701	0.257	2.74552e-55	gc_B_MKI67	SSB
PHGDH	9.48596e-60	0.69766	0.394	0.093	3.12003e-55	gc_B_MKI67	PHGDH
BRI3BP	9.698e-60	0.590459	0.424	0.099	3.18977e-55	gc_B_MKI67	BRI3BP
PSMA1	9.87058e-60	0.786726	0.754	0.32	3.24653e-55	gc_B_MKI67	PSMA1
SRRM1	1.14931e-59	0.934508	0.845	0.41	3.78021e-55	gc_B_MKI67	SRRM1
DRG1	1.59118e-59	0.60254	0.462	0.121	5.23354e-55	gc_B_MKI67	DRG1
PHF5A	1.59642e-59	0.683765	0.538	0.159	5.25078e-55	gc_B_MKI67	PHF5A
FUS	1.67958e-59	0.868892	0.92	0.466	5.52432e-55	gc_B_MKI67	FUS
CBX3	1.67999e-59	0.806854	0.72	0.272	5.52565e-55	gc_B_MKI67	CBX3
PPM1G	2.48301e-59	0.909501	0.674	0.271	8.16686e-55	gc_B_MKI67	PPM1G
CDK5RAP2	3.18648e-59	0.449714	0.337	0.062	1.04807e-54	gc_B_MKI67	CDK5RAP2
DDX46	3.44657e-59	0.849484	0.667	0.241	1.13361e-54	gc_B_MKI67	DDX46
MZT2A	3.64971e-59	0.893437	0.83	0.436	1.20043e-54	gc_B_MKI67	MZT2A
EIF2S2	3.7111e-59	0.89702	0.765	0.351	1.22062e-54	gc_B_MKI67	EIF2S2
TSN	7.39923e-59	0.479992	0.424	0.098	2.43368e-54	gc_B_MKI67	TSN
CETN3	1.04688e-58	0.448796	0.288	0.047	3.44328e-54	gc_B_MKI67	CETN3
CSNK1A1	1.18174e-58	0.708584	0.678	0.238	3.88685e-54	gc_B_MKI67	CSNK1A1
PCNP	1.40686e-58	0.756516	0.701	0.258	4.62732e-54	gc_B_MKI67	PCNP
ZNF581	1.47681e-58	0.70835	0.564	0.174	4.85737e-54	gc_B_MKI67	ZNF581
GTF2H5	1.55312e-58	0.497315	0.409	0.091	5.10837e-54	gc_B_MKI67	GTF2H5
PGK1	1.64509e-58	0.933883	0.879	0.495	5.41086e-54	gc_B_MKI67	PGK1
PLEKHJ1	1.85516e-58	0.677948	0.655	0.223	6.10181e-54	gc_B_MKI67	PLEKHJ1
SKAP2	2.0211e-58	0.574984	0.617	0.177	6.64762e-54	gc_B_MKI67	SKAP2
HIRIP3	2.16943e-58	0.531107	0.326	0.062	7.13547e-54	gc_B_MKI67	HIRIP3
SYNCRIP	2.63516e-58	0.701955	0.553	0.171	8.6673e-54	gc_B_MKI67	SYNCRIP
CHCHD1	3.90153e-58	0.702822	0.545	0.176	1.28325e-53	gc_B_MKI67	CHCHD1
CPNE3	4.24245e-58	0.811379	0.549	0.175	1.39538e-53	gc_B_MKI67	CPNE3
CNP	4.65167e-58	0.470412	0.364	0.075	1.52998e-53	gc_B_MKI67	CNP
SNRPB2	5.97913e-58	0.799934	0.674	0.25	1.9666e-53	gc_B_MKI67	SNRPB2
SKP1	6.74416e-58	0.958305	0.936	0.651	2.21822e-53	gc_B_MKI67	SKP1
COX7C	7.25826e-58	0.804204	0.992	0.838	2.38731e-53	gc_B_MKI67	COX7C
NSL1	7.7718e-58	0.585209	0.443	0.107	2.55622e-53	gc_B_MKI67	NSL1
UBA2	9.02895e-58	0.739447	0.583	0.188	2.96971e-53	gc_B_MKI67	UBA2
GGA2	9.4118e-58	0.688326	0.621	0.192	3.09563e-53	gc_B_MKI67	GGA2
NDUFA11	1.00773e-57	1.00581	0.822	0.475	3.31453e-53	gc_B_MKI67	NDUFA11
OAZ2	1.95704e-57	0.546183	0.394	0.088	6.43691e-53	gc_B_MKI67	OAZ2
KRR1	2.06992e-57	0.605478	0.492	0.134	6.80816e-53	gc_B_MKI67	KRR1
POLE3	2.42818e-57	0.563788	0.455	0.114	7.98652e-53	gc_B_MKI67	POLE3
NDUFA13	2.5419e-57	0.879385	0.913	0.577	8.36055e-53	gc_B_MKI67	NDUFA13
PNKD	2.63748e-57	0.782306	0.625	0.239	8.67492e-53	gc_B_MKI67	PNKD
PPP2R3C	3.1567e-57	0.490825	0.443	0.107	1.03827e-52	gc_B_MKI67	PPP2R3C
MRPL15	3.38434e-57	0.655231	0.458	0.122	1.11314e-52	gc_B_MKI67	MRPL15
UQCRFS1	3.74819e-57	0.830353	0.777	0.371	1.23282e-52	gc_B_MKI67	UQCRFS1
RAB11A	4.70832e-57	0.769552	0.682	0.257	1.54861e-52	gc_B_MKI67	RAB11A
USP5	5.88965e-57	0.418737	0.28	0.047	1.93716e-52	gc_B_MKI67	USP5
RBM3	6.4317e-57	0.925236	0.875	0.494	2.11545e-52	gc_B_MKI67	RBM3
ZCCHC7	6.51674e-57	0.80122	0.716	0.267	2.14342e-52	gc_B_MKI67	ZCCHC7
UQCRB	6.88376e-57	0.91274	0.97	0.738	2.26414e-52	gc_B_MKI67	UQCRB
RMI2	7.86458e-57	0.405918	0.242	0.033	2.58674e-52	gc_B_MKI67	RMI2
HLA-DMA	8.63062e-57	1.01152	0.958	0.574	2.8387e-52	gc_B_MKI67	HLA-DMA
COQ5	8.66245e-57	0.445254	0.299	0.053	2.84917e-52	gc_B_MKI67	COQ5
MRPS12	9.57121e-57	0.670849	0.515	0.158	3.14807e-52	gc_B_MKI67	MRPS12
NABP2	1.33127e-56	0.481553	0.364	0.079	4.37867e-52	gc_B_MKI67	NABP2
MPLKIP	1.37117e-56	0.644998	0.515	0.148	4.5099e-52	gc_B_MKI67	MPLKIP
SLIRP	1.43212e-56	0.882149	0.655	0.266	4.71038e-52	gc_B_MKI67	SLIRP
SNF8	1.50859e-56	0.734741	0.606	0.222	4.96189e-52	gc_B_MKI67	SNF8
KIF5B	1.69834e-56	0.767384	0.64	0.225	5.58599e-52	gc_B_MKI67	KIF5B
MRPL48	1.851e-56	0.582217	0.455	0.122	6.08813e-52	gc_B_MKI67	MRPL48
TMA7	2.04461e-56	0.845087	0.981	0.818	6.72493e-52	gc_B_MKI67	TMA7
BPTF	2.2581e-56	0.735242	0.739	0.288	7.42711e-52	gc_B_MKI67	BPTF
DCTN3	2.81753e-56	0.959178	0.697	0.321	9.26714e-52	gc_B_MKI67	DCTN3
SOD1	2.99081e-56	0.943708	0.883	0.524	9.83708e-52	gc_B_MKI67	SOD1
ARL6IP1	4.46522e-56	1.61236	0.735	0.34	1.46866e-51	gc_B_MKI67	ARL6IP1
PUF60	4.78478e-56	0.752537	0.648	0.246	1.57376e-51	gc_B_MKI67	PUF60
MRPL11	4.79107e-56	0.718443	0.561	0.179	1.57583e-51	gc_B_MKI67	MRPL11
MIEN1	9.61531e-56	0.699955	0.629	0.228	3.16257e-51	gc_B_MKI67	MIEN1
MRPL9	1.0547e-55	0.5763	0.492	0.139	3.46901e-51	gc_B_MKI67	MRPL9
SRSF11	1.12342e-55	0.808688	0.818	0.382	3.69503e-51	gc_B_MKI67	SRSF11
TWF2	1.44494e-55	0.599216	0.519	0.149	4.75257e-51	gc_B_MKI67	TWF2
TIMM8B	1.73003e-55	0.781636	0.561	0.197	5.69024e-51	gc_B_MKI67	TIMM8B
PTPN7	1.75266e-55	0.666009	0.598	0.193	5.76467e-51	gc_B_MKI67	PTPN7
MTHFS	1.75751e-55	0.557927	0.439	0.114	5.78064e-51	gc_B_MKI67	MTHFS
ZC3H13	2.00324e-55	0.629105	0.47	0.124	6.58886e-51	gc_B_MKI67	ZC3H13
SUGP2	2.16202e-55	0.44644	0.345	0.069	7.1111e-51	gc_B_MKI67	SUGP2
PRPF40A	2.26269e-55	0.76113	0.693	0.274	7.44223e-51	gc_B_MKI67	PRPF40A
IRF8	2.56553e-55	0.691177	0.909	0.323	8.43829e-51	gc_B_MKI67	IRF8
ZBTB8OS	3.34353e-55	0.877884	0.667	0.295	1.09972e-50	gc_B_MKI67	ZBTB8OS
MYL12B	3.83397e-55	0.924445	0.928	0.536	1.26103e-50	gc_B_MKI67	MYL12B
MZT2B	4.20377e-55	0.952311	0.913	0.64	1.38266e-50	gc_B_MKI67	MZT2B
CWC15	4.41243e-55	0.645487	0.595	0.207	1.45129e-50	gc_B_MKI67	CWC15
NDUFB1	4.61847e-55	0.798787	0.777	0.349	1.51906e-50	gc_B_MKI67	NDUFB1
NDUFS6	4.67954e-55	0.990686	0.731	0.376	1.53915e-50	gc_B_MKI67	NDUFS6
IDH2	5.38843e-55	0.901852	0.708	0.324	1.77231e-50	gc_B_MKI67	IDH2
LSM14A	5.39096e-55	0.83942	0.705	0.275	1.77314e-50	gc_B_MKI67	LSM14A
MCTS1	6.77546e-55	0.791849	0.648	0.266	2.22852e-50	gc_B_MKI67	MCTS1
RNASET2	9.04051e-55	-1.39301	0.155	0.677	2.97352e-50	gc_B_MKI67	RNASET2
PSMC1	9.20063e-55	0.780067	0.553	0.19	3.02618e-50	gc_B_MKI67	PSMC1
POU2F2	9.80057e-55	0.86499	0.811	0.365	3.2235e-50	gc_B_MKI67	POU2F2
UBE2E1	1.15418e-54	0.631627	0.587	0.192	3.7962e-50	gc_B_MKI67	UBE2E1
POLR1D	1.36036e-54	0.78007	0.784	0.368	4.47435e-50	gc_B_MKI67	POLR1D
CDCA7L	1.5419e-54	0.406875	0.413	0.09	5.07147e-50	gc_B_MKI67	CDCA7L
MYL6B	2.17089e-54	0.578807	0.47	0.137	7.14027e-50	gc_B_MKI67	MYL6B
MYL12A	2.19997e-54	0.956662	0.958	0.665	7.23591e-50	gc_B_MKI67	MYL12A
KARS	2.23799e-54	0.606896	0.466	0.128	7.36098e-50	gc_B_MKI67	KARS
DPY30	2.35858e-54	0.638119	0.572	0.187	7.75759e-50	gc_B_MKI67	DPY30
PSMD11	2.56754e-54	0.67577	0.598	0.219	8.44488e-50	gc_B_MKI67	PSMD11
UBB	3.0383e-54	1.08699	0.97	0.853	9.99326e-50	gc_B_MKI67	UBB
PSMC3	3.42414e-54	0.867968	0.636	0.27	1.12624e-49	gc_B_MKI67	PSMC3
RABL6	3.67013e-54	0.416904	0.303	0.056	1.20714e-49	gc_B_MKI67	RABL6
ING3	4.05058e-54	0.407688	0.379	0.081	1.33228e-49	gc_B_MKI67	ING3
PPIH	4.7732e-54	0.614182	0.496	0.143	1.56995e-49	gc_B_MKI67	PPIH
PGLS	5.86732e-54	0.688736	0.64	0.229	1.92982e-49	gc_B_MKI67	PGLS
CAPZA2	6.18109e-54	0.68731	0.625	0.221	2.03302e-49	gc_B_MKI67	CAPZA2
TOMM22	8.3922e-54	0.806982	0.708	0.302	2.76028e-49	gc_B_MKI67	TOMM22
URM1	9.23857e-54	0.566858	0.492	0.142	3.03866e-49	gc_B_MKI67	URM1
NFKBIA	1.04193e-53	-2.26005	0.277	0.701	3.427e-49	gc_B_MKI67	NFKBIA
COPS5	1.18875e-53	0.55657	0.53	0.168	3.9099e-49	gc_B_MKI67	COPS5
PNN	1.41489e-53	0.737174	0.758	0.304	4.65373e-49	gc_B_MKI67	PNN
RACK1	1.8011e-53	-1.53691	0.148	0.746	5.92399e-49	gc_B_MKI67	RACK1
EMP3	2.03563e-53	-1.42907	0.095	0.611	6.69538e-49	gc_B_MKI67	EMP3
NAP1L4	2.40006e-53	0.772088	0.655	0.262	7.89403e-49	gc_B_MKI67	NAP1L4
MT-ATP8	2.67247e-53	-2.09812	0.178	0.713	8.79003e-49	gc_B_MKI67	MT-ATP8
FCRLA	3.60568e-53	0.820019	0.777	0.294	1.18594e-48	gc_B_MKI67	FCRLA
ENOPH1	3.70515e-53	0.521608	0.39	0.093	1.21866e-48	gc_B_MKI67	ENOPH1
PDAP1	4.49684e-53	0.749589	0.598	0.219	1.47905e-48	gc_B_MKI67	PDAP1
THOC2	4.52523e-53	0.638957	0.553	0.173	1.48839e-48	gc_B_MKI67	THOC2
RRP7A	6.45757e-53	0.518741	0.527	0.155	2.12396e-48	gc_B_MKI67	RRP7A
EXOSC8	9.93795e-53	0.5843	0.477	0.137	3.26869e-48	gc_B_MKI67	EXOSC8
MRPL14	1.1491e-52	0.731522	0.557	0.194	3.77952e-48	gc_B_MKI67	MRPL14
AKR1B1	1.22072e-52	0.865531	0.61	0.249	4.01507e-48	gc_B_MKI67	AKR1B1
SUCLG1	1.42448e-52	0.66005	0.549	0.191	4.68525e-48	gc_B_MKI67	SUCLG1
PPHLN1	1.8579e-52	0.642837	0.591	0.198	6.11081e-48	gc_B_MKI67	PPHLN1
CSK	2.38084e-52	0.734389	0.701	0.254	7.83083e-48	gc_B_MKI67	CSK
TRNAU1AP	2.47265e-52	0.524282	0.409	0.103	8.13279e-48	gc_B_MKI67	TRNAU1AP
PTGES3	2.63663e-52	0.872452	0.886	0.539	8.67214e-48	gc_B_MKI67	PTGES3
SNAP23	3.82281e-52	0.647611	0.61	0.199	1.25736e-47	gc_B_MKI67	SNAP23
CDC5L	4.05616e-52	0.474704	0.447	0.115	1.33411e-47	gc_B_MKI67	CDC5L
EID1	4.29496e-52	0.772662	0.769	0.364	1.41266e-47	gc_B_MKI67	EID1
PSMC5	4.41814e-52	0.835779	0.648	0.271	1.45317e-47	gc_B_MKI67	PSMC5
AHCY	4.58873e-52	0.700812	0.485	0.156	1.50928e-47	gc_B_MKI67	AHCY
PABPC1	5.92849e-52	0.836059	0.985	0.848	1.94994e-47	gc_B_MKI67	PABPC1
PFDN2	6.3194e-52	0.722048	0.659	0.257	2.07851e-47	gc_B_MKI67	PFDN2
OXCT1	6.903e-52	0.410058	0.348	0.074	2.27046e-47	gc_B_MKI67	OXCT1
PSMD2	8.38809e-52	0.743904	0.58	0.216	2.75893e-47	gc_B_MKI67	PSMD2
HSD17B10	8.78077e-52	0.784138	0.614	0.25	2.88808e-47	gc_B_MKI67	HSD17B10
POLR2L	1.01604e-51	0.857151	0.883	0.573	3.34187e-47	gc_B_MKI67	POLR2L
TMEM183A	1.69281e-51	0.556374	0.47	0.139	5.56783e-47	gc_B_MKI67	TMEM183A
FAM104B	1.73101e-51	0.43313	0.303	0.06	5.69347e-47	gc_B_MKI67	FAM104B
SAP18	1.80931e-51	0.804188	0.898	0.565	5.951e-47	gc_B_MKI67	SAP18
LUC7L3	2.97744e-51	0.621694	0.682	0.253	9.7931e-47	gc_B_MKI67	LUC7L3
MORF4L1	3.14507e-51	0.870055	0.89	0.547	1.03445e-46	gc_B_MKI67	MORF4L1
PSMA3	4.31772e-51	0.86125	0.67	0.297	1.42014e-46	gc_B_MKI67	PSMA3
PSMD13	4.60313e-51	0.714846	0.625	0.247	1.51401e-46	gc_B_MKI67	PSMD13
CSNK2B	5.89224e-51	0.875016	0.811	0.462	1.93802e-46	gc_B_MKI67	CSNK2B
KHSRP	6.781e-51	0.410532	0.311	0.061	2.23034e-46	gc_B_MKI67	KHSRP
SNAPIN	6.99207e-51	0.462026	0.413	0.104	2.29976e-46	gc_B_MKI67	SNAPIN
ETFB	7.6621e-51	0.749252	0.716	0.335	2.52014e-46	gc_B_MKI67	ETFB
JCHAIN	8.96257e-51	-6.87885	0.091	0.567	2.94788e-46	gc_B_MKI67	JCHAIN
SMIM20	9.1434e-51	0.655136	0.549	0.194	3.00736e-46	gc_B_MKI67	SMIM20
EIF2B1	1.0309e-50	0.48226	0.436	0.117	3.39073e-46	gc_B_MKI67	EIF2B1
COQ7	1.08767e-50	0.447688	0.318	0.064	3.57745e-46	gc_B_MKI67	COQ7
RPS7	1.38768e-50	0.736144	1	0.981	4.56421e-46	gc_B_MKI67	RPS7
EIF4E	1.4085e-50	0.636487	0.595	0.215	4.6327e-46	gc_B_MKI67	EIF4E
ATG4B	1.6546e-50	0.446333	0.367	0.086	5.44215e-46	gc_B_MKI67	ATG4B
RPIA	1.81186e-50	0.472365	0.405	0.098	5.9594e-46	gc_B_MKI67	RPIA
MAD2L2	1.84959e-50	0.664579	0.481	0.156	6.08348e-46	gc_B_MKI67	MAD2L2
RPS27L	2.17092e-50	1.0004	0.867	0.566	7.14036e-46	gc_B_MKI67	RPS27L
ZCRB1	2.32869e-50	0.63239	0.515	0.169	7.65931e-46	gc_B_MKI67	ZCRB1
MBD4	2.8188e-50	0.817536	0.811	0.386	9.27132e-46	gc_B_MKI67	MBD4
RHOG	2.99853e-50	0.567708	0.667	0.231	9.86245e-46	gc_B_MKI67	RHOG
CALM1	3.20683e-50	0.853155	0.947	0.704	1.05476e-45	gc_B_MKI67	CALM1
UQCRQ	3.31502e-50	0.813293	0.856	0.54	1.09034e-45	gc_B_MKI67	UQCRQ
RSRC1	3.55253e-50	0.441964	0.473	0.133	1.16846e-45	gc_B_MKI67	RSRC1
TFDP1	4.4795e-50	0.625983	0.367	0.088	1.47335e-45	gc_B_MKI67	TFDP1
PRKRA	4.51014e-50	0.644371	0.519	0.176	1.48343e-45	gc_B_MKI67	PRKRA
AURKAIP1	5.2756e-50	0.871468	0.792	0.479	1.7352e-45	gc_B_MKI67	AURKAIP1
RAC2	6.92887e-50	0.904509	0.947	0.693	2.27898e-45	gc_B_MKI67	RAC2
RPLP2	7.28068e-50	0.73732	1	0.977	2.39469e-45	gc_B_MKI67	RPLP2
PSIP1	7.31433e-50	0.71129	0.64	0.227	2.40576e-45	gc_B_MKI67	PSIP1
UBL5	1.0936e-49	0.832184	0.917	0.668	3.59697e-45	gc_B_MKI67	UBL5
MT-CO3	1.49798e-49	0.956308	0.992	0.967	4.92699e-45	gc_B_MKI67	MT-CO3
RPL41	2.02298e-49	0.88137	1	0.971	6.65379e-45	gc_B_MKI67	RPL41
PCMT1	2.35355e-49	0.751964	0.629	0.262	7.74107e-45	gc_B_MKI67	PCMT1
SERPINB1	2.4775e-49	0.666585	0.633	0.236	8.14873e-45	gc_B_MKI67	SERPINB1
UBE2J1	3.33074e-49	0.915257	0.917	0.568	1.09551e-44	gc_B_MKI67	UBE2J1
COX4I1	3.42823e-49	0.719531	0.996	0.897	1.12758e-44	gc_B_MKI67	COX4I1
PCLAF	3.59444e-49	0.537536	0.114	0.008	1.18225e-44	gc_B_MKI67	PCLAF
OLA1	5.17139e-49	0.604776	0.549	0.193	1.70092e-44	gc_B_MKI67	OLA1
GCA	5.66087e-49	0.494499	0.481	0.139	1.86192e-44	gc_B_MKI67	GCA
LAPTM5	5.97987e-49	0.934452	0.97	0.548	1.96684e-44	gc_B_MKI67	LAPTM5
MRPS10	6.42641e-49	0.467354	0.413	0.108	2.11371e-44	gc_B_MKI67	MRPS10
RPL3	6.48318e-49	0.778735	0.996	0.978	2.13238e-44	gc_B_MKI67	RPL3
ROCK1	1.00995e-48	0.574651	0.621	0.207	3.32181e-44	gc_B_MKI67	ROCK1
PSMD6	1.0285e-48	0.640565	0.568	0.216	3.38285e-44	gc_B_MKI67	PSMD6
POLR2K	1.06e-48	0.794494	0.712	0.337	3.48646e-44	gc_B_MKI67	POLR2K
GLOD4	1.12139e-48	0.455399	0.409	0.104	3.68835e-44	gc_B_MKI67	GLOD4
CDC123	1.14461e-48	0.623866	0.523	0.174	3.76475e-44	gc_B_MKI67	CDC123
LYPLAL1	1.22604e-48	0.441991	0.413	0.105	4.03257e-44	gc_B_MKI67	LYPLAL1
MRPS14	1.29369e-48	0.617976	0.481	0.156	4.25506e-44	gc_B_MKI67	MRPS14
BAZ1A	1.41183e-48	0.596502	0.58	0.188	4.64364e-44	gc_B_MKI67	BAZ1A
APOBEC3C	1.82809e-48	0.523315	0.527	0.166	6.01276e-44	gc_B_MKI67	APOBEC3C
SSBP1	2.24302e-48	0.827484	0.705	0.333	7.3775e-44	gc_B_MKI67	SSBP1
EIF4E2	2.29933e-48	0.534532	0.496	0.158	7.56273e-44	gc_B_MKI67	EIF4E2
EEF1A1	2.64635e-48	0.770106	1	0.988	8.70412e-44	gc_B_MKI67	EEF1A1
SCP2	2.98858e-48	0.631924	0.595	0.213	9.82975e-44	gc_B_MKI67	SCP2
SLC25A11	4.80587e-48	0.522358	0.451	0.134	1.5807e-43	gc_B_MKI67	SLC25A11
CCAR1	6.03641e-48	0.584694	0.508	0.16	1.98544e-43	gc_B_MKI67	CCAR1
HNRNPH2	7.55071e-48	0.43926	0.398	0.097	2.48351e-43	gc_B_MKI67	HNRNPH2
HCLS1	7.66504e-48	0.807793	0.875	0.509	2.52111e-43	gc_B_MKI67	HCLS1
TIPRL	1.04691e-47	0.525903	0.439	0.127	3.44338e-43	gc_B_MKI67	TIPRL
C1orf35	1.32727e-47	0.451974	0.326	0.071	4.36552e-43	gc_B_MKI67	C1orf35
ZDHHC12	1.97873e-47	0.599487	0.439	0.132	6.50824e-43	gc_B_MKI67	ZDHHC12
ALDH2	2.10931e-47	0.631381	0.42	0.124	6.93774e-43	gc_B_MKI67	ALDH2
TIFA	2.12479e-47	0.77621	0.572	0.224	6.98864e-43	gc_B_MKI67	TIFA
DTNBP1	2.37541e-47	0.450421	0.436	0.116	7.81296e-43	gc_B_MKI67	DTNBP1
ACTR2	2.60006e-47	0.776906	0.754	0.333	8.55184e-43	gc_B_MKI67	ACTR2
MRPL37	3.00563e-47	0.656343	0.5	0.171	9.88581e-43	gc_B_MKI67	MRPL37
SNRPD2	3.16115e-47	0.808406	0.939	0.696	1.03973e-42	gc_B_MKI67	SNRPD2
TAF12	3.29167e-47	0.601145	0.485	0.159	1.08266e-42	gc_B_MKI67	TAF12
ABCF1	3.29639e-47	0.536275	0.439	0.125	1.08421e-42	gc_B_MKI67	ABCF1
TXNRD1	4.06902e-47	0.4222	0.303	0.064	1.33834e-42	gc_B_MKI67	TXNRD1
RPL6	4.93382e-47	0.682017	0.996	0.974	1.62278e-42	gc_B_MKI67	RPL6
NUBP1	8.38606e-47	0.446242	0.383	0.096	2.75826e-42	gc_B_MKI67	NUBP1
TCP1	8.96715e-47	0.752503	0.595	0.233	2.94938e-42	gc_B_MKI67	TCP1
C4orf3	9.2754e-47	1.0618	0.837	0.561	3.05077e-42	gc_B_MKI67	C4orf3
SEMA4A	1.05862e-46	0.687355	0.428	0.137	3.48192e-42	gc_B_MKI67	SEMA4A
2024-09-11	1.102e-46	0.421905	0.292	0.06	3.62459e-42	gc_B_MKI67	2024-09-11
VDAC2	1.37276e-46	0.790178	0.788	0.44	4.51514e-42	gc_B_MKI67	VDAC2
ILF3	1.70193e-46	0.734772	0.629	0.244	5.59782e-42	gc_B_MKI67	ILF3
SRSF7	1.70281e-46	0.69915	0.958	0.558	5.6007e-42	gc_B_MKI67	SRSF7
CD40	1.93828e-46	0.725342	0.705	0.286	6.3752e-42	gc_B_MKI67	CD40
CCND3	2.00394e-46	0.709607	0.742	0.311	6.59114e-42	gc_B_MKI67	CCND3
RPL27	2.048e-46	0.773546	0.989	0.893	6.73608e-42	gc_B_MKI67	RPL27
B2M	2.11116e-46	-1.04529	0.992	0.994	6.9438e-42	gc_B_MKI67	B2M
CCDC69	2.34459e-46	0.802925	0.614	0.269	7.71158e-42	gc_B_MKI67	CCDC69
RPL26L1	2.6233e-46	0.517395	0.394	0.11	8.62828e-42	gc_B_MKI67	RPL26L1
COX7A2L	2.65745e-46	0.719287	0.75	0.38	8.74062e-42	gc_B_MKI67	COX7A2L
ASF1A	2.89296e-46	0.429924	0.341	0.08	9.51522e-42	gc_B_MKI67	ASF1A
TAF15	2.91762e-46	0.583517	0.564	0.195	9.59634e-42	gc_B_MKI67	TAF15
FAM129A	2.92113e-46	0.657563	0.413	0.124	9.60789e-42	gc_B_MKI67	FAM129A
TENT5C	3.21696e-46	-1.4943	0.011	0.486	1.05809e-41	gc_B_MKI67	TENT5C
GABARAPL2	3.32663e-46	0.802192	0.75	0.391	1.09416e-41	gc_B_MKI67	GABARAPL2
DDIT4	3.60123e-46	-1.94361	0.178	0.617	1.18448e-41	gc_B_MKI67	DDIT4
EIF3D	3.60875e-46	0.696526	0.799	0.389	1.18695e-41	gc_B_MKI67	EIF3D
IAH1	3.82724e-46	0.521402	0.496	0.158	1.25882e-41	gc_B_MKI67	IAH1
NANS	5.66704e-46	0.985709	0.67	0.36	1.86395e-41	gc_B_MKI67	NANS
S100A10	6.0658e-46	0.899681	0.727	0.351	1.9951e-41	gc_B_MKI67	S100A10
TMEM14A	6.23084e-46	0.510314	0.42	0.121	2.04939e-41	gc_B_MKI67	TMEM14A
COPS8	6.82294e-46	0.635922	0.466	0.15	2.24413e-41	gc_B_MKI67	COPS8
COX7B	7.6944e-46	0.885273	0.799	0.463	2.53076e-41	gc_B_MKI67	COX7B
NAA50	8.64009e-46	0.553959	0.534	0.179	2.84181e-41	gc_B_MKI67	NAA50
SFT2D1	8.84634e-46	0.732664	0.708	0.346	2.90965e-41	gc_B_MKI67	SFT2D1
CACYBP	9.84297e-46	0.619236	0.712	0.312	3.23745e-41	gc_B_MKI67	CACYBP
PSMB8	1.35406e-45	0.873879	0.814	0.482	4.45363e-41	gc_B_MKI67	PSMB8
ARMC1	1.55781e-45	0.416425	0.367	0.091	5.12379e-41	gc_B_MKI67	ARMC1
COPE	2.25215e-45	0.761994	0.883	0.582	7.40755e-41	gc_B_MKI67	COPE
ATP6V1H	2.79482e-45	0.440058	0.375	0.093	9.19245e-41	gc_B_MKI67	ATP6V1H
MRPL4	2.84113e-45	0.638674	0.515	0.184	9.34476e-41	gc_B_MKI67	MRPL4
CHCHD3	3.55509e-45	0.500142	0.47	0.148	1.1693e-40	gc_B_MKI67	CHCHD3
IFI16	3.72528e-45	0.693985	0.754	0.326	1.22528e-40	gc_B_MKI67	IFI16
KLHDC3	4.21527e-45	0.409489	0.356	0.089	1.38645e-40	gc_B_MKI67	KLHDC3
SMARCE1	5.30428e-45	0.491448	0.492	0.154	1.74463e-40	gc_B_MKI67	SMARCE1
STRAP	5.56247e-45	0.679745	0.629	0.26	1.82955e-40	gc_B_MKI67	STRAP
NUDCD2	5.87386e-45	0.57148	0.508	0.176	1.93197e-40	gc_B_MKI67	NUDCD2
SEC14L1	5.99717e-45	0.810274	0.674	0.339	1.97253e-40	gc_B_MKI67	SEC14L1
ACP1	6.26658e-45	0.728857	0.689	0.34	2.06114e-40	gc_B_MKI67	ACP1
CDKN2D	7.82779e-45	0.456083	0.356	0.08	2.57464e-40	gc_B_MKI67	CDKN2D
BLOC1S2	8.39078e-45	0.47286	0.527	0.164	2.75981e-40	gc_B_MKI67	BLOC1S2
TBCB	1.09956e-44	0.551458	0.545	0.181	3.61656e-40	gc_B_MKI67	TBCB
SMDT1	1.14306e-44	0.760316	0.92	0.66	3.75963e-40	gc_B_MKI67	SMDT1
NUDT5	1.16032e-44	0.612649	0.477	0.164	3.8164e-40	gc_B_MKI67	NUDT5
LLPH	1.43937e-44	0.424153	0.409	0.111	4.73423e-40	gc_B_MKI67	LLPH
MRPL16	1.82262e-44	0.603413	0.515	0.188	5.99479e-40	gc_B_MKI67	MRPL16
GMFG	2.7625e-44	0.820766	0.852	0.515	9.08614e-40	gc_B_MKI67	GMFG
XRCC6	2.80443e-44	0.76943	0.765	0.41	9.22404e-40	gc_B_MKI67	XRCC6
HDAC7	3.13179e-44	0.446734	0.375	0.097	1.03008e-39	gc_B_MKI67	HDAC7
MRPL44	4.04195e-44	0.440274	0.352	0.088	1.32944e-39	gc_B_MKI67	MRPL44
NUGGC	4.58918e-44	0.723884	0.394	0.123	1.50943e-39	gc_B_MKI67	NUGGC
CHCHD10	4.96478e-44	-1.14142	0.178	0.657	1.63297e-39	gc_B_MKI67	CHCHD10
RPS9	5.14904e-44	0.717977	0.996	0.969	1.69357e-39	gc_B_MKI67	RPS9
ARL6IP4	5.56043e-44	0.78509	0.875	0.599	1.82888e-39	gc_B_MKI67	ARL6IP4
FIP1L1	6.43314e-44	0.447978	0.447	0.132	2.11592e-39	gc_B_MKI67	FIP1L1
TIMMDC1	7.50374e-44	0.467016	0.417	0.126	2.46805e-39	gc_B_MKI67	TIMMDC1
NDUFA10	9.47119e-44	0.577163	0.553	0.211	3.11517e-39	gc_B_MKI67	NDUFA10
PPP2R5C	1.15279e-43	0.688826	0.667	0.292	3.79163e-39	gc_B_MKI67	PPP2R5C
RBM8A	1.33505e-43	0.769143	0.86	0.517	4.39111e-39	gc_B_MKI67	RBM8A
ATXN10	1.73278e-43	0.592704	0.534	0.2	5.6993e-39	gc_B_MKI67	ATXN10
PPP1R18	1.76032e-43	0.554933	0.53	0.173	5.78986e-39	gc_B_MKI67	PPP1R18
NCL	1.79007e-43	0.994664	0.886	0.625	5.88773e-39	gc_B_MKI67	NCL
IGHA1	1.96813e-43	-5.55044	0.027	0.48	6.47338e-39	gc_B_MKI67	IGHA1
SS18L2	2.0124e-43	0.647524	0.663	0.283	6.61899e-39	gc_B_MKI67	SS18L2
PPP2R1A	2.05326e-43	0.647166	0.667	0.292	6.75339e-39	gc_B_MKI67	PPP2R1A
PLEK	2.2522e-43	0.577844	0.481	0.154	7.40771e-39	gc_B_MKI67	PLEK
SNRNP27	2.36944e-43	0.437355	0.417	0.118	7.79332e-39	gc_B_MKI67	SNRNP27
POLE4	2.75515e-43	0.608029	0.527	0.183	9.06197e-39	gc_B_MKI67	POLE4
PHIP	3.16842e-43	0.561318	0.595	0.228	1.04212e-38	gc_B_MKI67	PHIP
ZNF207	3.83185e-43	0.668164	0.667	0.29	1.26034e-38	gc_B_MKI67	ZNF207
ITM2C	4.2228e-43	-1.54189	0.011	0.465	1.38892e-38	gc_B_MKI67	ITM2C
SPATS2	4.66767e-43	0.786363	0.629	0.311	1.53524e-38	gc_B_MKI67	SPATS2
NDUFAF3	5.89283e-43	0.765998	0.75	0.419	1.93821e-38	gc_B_MKI67	NDUFAF3
COPS4	6.21359e-43	0.418242	0.36	0.093	2.04371e-38	gc_B_MKI67	COPS4
SNX5	7.06866e-43	0.627493	0.644	0.271	2.32495e-38	gc_B_MKI67	SNX5
LAMTOR5	7.67945e-43	0.649507	0.788	0.395	2.52585e-38	gc_B_MKI67	LAMTOR5
SDHC	7.94986e-43	0.675727	0.629	0.284	2.61479e-38	gc_B_MKI67	SDHC
SSR4	8.0159e-43	-3.0525	0.667	0.726	2.63651e-38	gc_B_MKI67	SSR4
CD44	8.66953e-43	-1.37661	0.125	0.581	2.8515e-38	gc_B_MKI67	CD44
TSG101	1.05216e-42	0.572925	0.485	0.166	3.46065e-38	gc_B_MKI67	TSG101
RPL31	1.11638e-42	0.526342	0.989	0.842	3.67187e-38	gc_B_MKI67	RPL31
ADH5	1.13371e-42	0.532149	0.489	0.167	3.7289e-38	gc_B_MKI67	ADH5
VAPA	2.28688e-42	0.713334	0.75	0.385	7.52177e-38	gc_B_MKI67	VAPA
VASP	2.63063e-42	0.572941	0.629	0.235	8.65239e-38	gc_B_MKI67	VASP
NDUFC2	3.48009e-42	0.741179	0.686	0.355	1.14464e-37	gc_B_MKI67	NDUFC2
ATP5MC2	3.52266e-42	-1.05347	0.144	0.676	1.15864e-37	gc_B_MKI67	ATP5MC2
OARD1	4.15386e-42	0.419431	0.405	0.114	1.36625e-37	gc_B_MKI67	OARD1
POU2AF1	4.84262e-42	0.788734	0.867	0.553	1.59279e-37	gc_B_MKI67	POU2AF1
ATP5F1E	4.92615e-42	-0.842793	0.144	0.697	1.62026e-37	gc_B_MKI67	ATP5F1E
CUX1	4.96176e-42	0.481604	0.447	0.142	1.63197e-37	gc_B_MKI67	CUX1
CCDC12	5.116e-42	0.509704	0.629	0.241	1.6827e-37	gc_B_MKI67	CCDC12
BZW1	8.3762e-42	0.640417	0.655	0.28	2.75502e-37	gc_B_MKI67	BZW1
HIST1H2AJ	8.94922e-42	0.424176	0.133	0.014	2.94349e-37	gc_B_MKI67	HIST1H2AJ
LPXN	9.34405e-42	0.614444	0.602	0.241	3.07335e-37	gc_B_MKI67	LPXN
PAICS	9.49349e-42	0.491603	0.341	0.09	3.1225e-37	gc_B_MKI67	PAICS
HSP90B1	9.56939e-42	-2.022	0.375	0.656	3.14747e-37	gc_B_MKI67	HSP90B1
SRSF6	1.15376e-41	0.429203	0.47	0.145	3.79483e-37	gc_B_MKI67	SRSF6
MTMR14	1.18461e-41	0.515727	0.447	0.138	3.89631e-37	gc_B_MKI67	MTMR14
IGBP1	1.20812e-41	0.655176	0.667	0.313	3.97362e-37	gc_B_MKI67	IGBP1
C11orf58	1.37006e-41	0.717984	0.837	0.495	4.50625e-37	gc_B_MKI67	C11orf58
CCT4	1.39541e-41	0.758611	0.723	0.361	4.58963e-37	gc_B_MKI67	CCT4
RBMX2	1.41463e-41	0.406621	0.33	0.081	4.65287e-37	gc_B_MKI67	RBMX2
SNW1	1.55868e-41	0.475899	0.47	0.151	5.12665e-37	gc_B_MKI67	SNW1
RBM6	1.60514e-41	0.727707	0.697	0.335	5.27945e-37	gc_B_MKI67	RBM6
H2AFJ	1.70206e-41	0.630139	0.451	0.156	5.59825e-37	gc_B_MKI67	H2AFJ
TTC1	1.78286e-41	0.481367	0.473	0.153	5.86402e-37	gc_B_MKI67	TTC1
PFDN6	1.85534e-41	0.463855	0.432	0.133	6.10238e-37	gc_B_MKI67	PFDN6
NDUFB5	2.03907e-41	0.6511	0.674	0.325	6.7067e-37	gc_B_MKI67	NDUFB5
EIF1AX	2.0609e-41	0.747255	0.686	0.333	6.77851e-37	gc_B_MKI67	EIF1AX
MRPS23	2.18995e-41	0.435855	0.379	0.108	7.20295e-37	gc_B_MKI67	MRPS23
LMO2	2.38267e-41	0.516385	0.212	0.034	7.83682e-37	gc_B_MKI67	LMO2
SSNA1	2.88757e-41	0.637973	0.617	0.28	9.4975e-37	gc_B_MKI67	SSNA1
PSMC6	3.12261e-41	0.535851	0.534	0.198	1.02706e-36	gc_B_MKI67	PSMC6
MRPS16	3.84695e-41	0.603488	0.545	0.228	1.2653e-36	gc_B_MKI67	MRPS16
MLH1	4.03756e-41	0.431249	0.318	0.08	1.32799e-36	gc_B_MKI67	MLH1
TUFM	4.11989e-41	0.797065	0.773	0.481	1.35507e-36	gc_B_MKI67	TUFM
UQCRC2	4.69639e-41	0.64403	0.617	0.267	1.54469e-36	gc_B_MKI67	UQCRC2
UXT	4.69979e-41	0.702254	0.871	0.536	1.54581e-36	gc_B_MKI67	UXT
UBE2G1	4.77054e-41	0.684469	0.568	0.244	1.56908e-36	gc_B_MKI67	UBE2G1
CHMP5	6.76116e-41	0.60091	0.549	0.216	2.22381e-36	gc_B_MKI67	CHMP5
DKC1	8.19424e-41	0.47374	0.375	0.103	2.69517e-36	gc_B_MKI67	DKC1
ISY1	8.31366e-41	0.410922	0.307	0.073	2.73445e-36	gc_B_MKI67	ISY1
SUB1	1.00331e-40	-1.19531	0.394	0.716	3.3e-36	gc_B_MKI67	SUB1
GHITM	1.08452e-40	0.699357	0.765	0.437	3.56709e-36	gc_B_MKI67	GHITM
ARPC5L	1.18497e-40	0.64285	0.686	0.328	3.89748e-36	gc_B_MKI67	ARPC5L
FUBP1	1.19376e-40	0.478847	0.515	0.179	3.92638e-36	gc_B_MKI67	FUBP1
PDCD10	1.21809e-40	0.561641	0.485	0.164	4.00643e-36	gc_B_MKI67	PDCD10
ARF3	1.39085e-40	0.480745	0.394	0.119	4.57465e-36	gc_B_MKI67	ARF3
RBM17	1.60767e-40	0.695569	0.64	0.294	5.28779e-36	gc_B_MKI67	RBM17
RPS18	1.68602e-40	0.742564	0.996	0.988	5.54547e-36	gc_B_MKI67	RPS18
TPR	1.73013e-40	0.640083	0.583	0.225	5.69059e-36	gc_B_MKI67	TPR
TIMM13	2.17082e-40	0.713244	0.511	0.199	7.14004e-36	gc_B_MKI67	TIMM13
TRMT112	2.18913e-40	0.688202	0.917	0.659	7.20027e-36	gc_B_MKI67	TRMT112
CLIC1	2.2318e-40	0.741583	0.939	0.738	7.34061e-36	gc_B_MKI67	CLIC1
FAM32A	2.26936e-40	0.423797	0.443	0.14	7.46415e-36	gc_B_MKI67	FAM32A
IMPDH2	2.29438e-40	0.722089	0.602	0.261	7.54645e-36	gc_B_MKI67	IMPDH2
NUDC	2.40288e-40	0.705244	0.644	0.303	7.9033e-36	gc_B_MKI67	NUDC
HP1BP3	2.74579e-40	0.738208	0.659	0.308	9.03118e-36	gc_B_MKI67	HP1BP3
MED28	2.91962e-40	0.467237	0.511	0.174	9.60293e-36	gc_B_MKI67	MED28
PFDN1	3.03898e-40	0.429987	0.398	0.116	9.99549e-36	gc_B_MKI67	PFDN1
NHP2	3.05092e-40	0.677199	0.652	0.302	1.00348e-35	gc_B_MKI67	NHP2
PRPF31	3.37556e-40	0.481518	0.451	0.146	1.11026e-35	gc_B_MKI67	PRPF31
DHX15	3.38618e-40	0.415215	0.405	0.119	1.11375e-35	gc_B_MKI67	DHX15
RPL22	3.65634e-40	0.677897	0.996	0.945	1.20261e-35	gc_B_MKI67	RPL22
PSMD3	4.39249e-40	0.582795	0.515	0.202	1.44473e-35	gc_B_MKI67	PSMD3
EBP	4.73398e-40	0.465136	0.398	0.122	1.55705e-35	gc_B_MKI67	EBP
DGUOK	4.98721e-40	0.684903	0.633	0.288	1.64034e-35	gc_B_MKI67	DGUOK
NFYC	5.17841e-40	0.483176	0.436	0.139	1.70323e-35	gc_B_MKI67	NFYC
ATP6V1D	5.21721e-40	0.438564	0.322	0.082	1.71599e-35	gc_B_MKI67	ATP6V1D
GMDS	5.43558e-40	0.909573	0.519	0.219	1.78782e-35	gc_B_MKI67	GMDS
SMARCB1	7.02782e-40	0.727349	0.788	0.463	2.31152e-35	gc_B_MKI67	SMARCB1
SMIM14	8.85475e-40	1.03314	0.742	0.365	2.91242e-35	gc_B_MKI67	SMIM14
NOP10	1.00288e-39	0.732934	0.742	0.408	3.29858e-35	gc_B_MKI67	NOP10
TACC1	1.17165e-39	0.622575	0.568	0.22	3.85368e-35	gc_B_MKI67	TACC1
SF3A3	1.48483e-39	0.516515	0.458	0.154	4.88375e-35	gc_B_MKI67	SF3A3
DCAF7	1.66286e-39	0.578041	0.489	0.174	5.46933e-35	gc_B_MKI67	DCAF7
SDHAF2	2.07934e-39	0.41409	0.314	0.078	6.83915e-35	gc_B_MKI67	SDHAF2
SYF2	2.12127e-39	0.604158	0.742	0.357	6.97706e-35	gc_B_MKI67	SYF2
ZNF428	2.67449e-39	0.574283	0.534	0.214	8.79665e-35	gc_B_MKI67	ZNF428
CD38	3.33255e-39	0.867341	0.697	0.386	1.09611e-34	gc_B_MKI67	CD38
EWSR1	3.46571e-39	0.699162	0.731	0.382	1.13991e-34	gc_B_MKI67	EWSR1
EEF1E1	3.82036e-39	0.47404	0.383	0.112	1.25655e-34	gc_B_MKI67	EEF1E1
ADRM1	4.38653e-39	0.723829	0.648	0.327	1.44277e-34	gc_B_MKI67	ADRM1
ELL3	4.88331e-39	0.491137	0.167	0.023	1.60617e-34	gc_B_MKI67	ELL3
PPA1	5.55815e-39	0.804295	0.663	0.361	1.82813e-34	gc_B_MKI67	PPA1
UBE2R2	5.60284e-39	0.453588	0.379	0.111	1.84283e-34	gc_B_MKI67	UBE2R2
FKBP11	6.94482e-39	-1.99242	0.106	0.497	2.28422e-34	gc_B_MKI67	FKBP11
MRPS18C	7.46972e-39	0.564569	0.53	0.212	2.45686e-34	gc_B_MKI67	MRPS18C
SF3B2	7.60719e-39	0.650089	0.788	0.444	2.50208e-34	gc_B_MKI67	SF3B2
PSMB4	1.14967e-38	0.654457	0.557	0.24	3.78136e-34	gc_B_MKI67	PSMB4
CD79A	1.21138e-38	0.67716	0.985	0.929	3.98436e-34	gc_B_MKI67	CD79A
CNIH1	1.29929e-38	0.639989	0.553	0.236	4.27351e-34	gc_B_MKI67	CNIH1
RPS3	1.92209e-38	0.667725	1	0.983	6.32196e-34	gc_B_MKI67	RPS3
DSTN	2.1643e-38	1.03536	0.576	0.292	7.11861e-34	gc_B_MKI67	DSTN
STOML2	2.28405e-38	0.718981	0.58	0.278	7.51247e-34	gc_B_MKI67	STOML2
EEF2	3.54443e-38	0.640628	0.992	0.904	1.1658e-33	gc_B_MKI67	EEF2
LAMTOR2	4.29219e-38	0.622961	0.576	0.26	1.41174e-33	gc_B_MKI67	LAMTOR2
SNX3	6.58267e-38	0.615629	0.894	0.572	2.16511e-33	gc_B_MKI67	SNX3
MX1	7.07431e-38	0.72059	0.492	0.181	2.32681e-33	gc_B_MKI67	MX1
NDUFS3	8.98592e-38	0.635707	0.542	0.239	2.95556e-33	gc_B_MKI67	NDUFS3
RNPS1	9.0481e-38	0.616282	0.682	0.322	2.97601e-33	gc_B_MKI67	RNPS1
SELENOK	9.62439e-38	-1.09029	0.091	0.515	3.16556e-33	gc_B_MKI67	SELENOK
HNRNPD	9.91013e-38	0.82628	0.723	0.413	3.25954e-33	gc_B_MKI67	HNRNPD
SNRPA	1.3011e-37	0.603003	0.515	0.202	4.27945e-33	gc_B_MKI67	SNRPA
SELENOM	1.52413e-37	-0.893301	0.004	0.414	5.013e-33	gc_B_MKI67	SELENOM
EZR	1.58799e-37	0.692924	0.962	0.652	5.22307e-33	gc_B_MKI67	EZR
SEPHS1	1.65547e-37	0.432498	0.299	0.077	5.445e-33	gc_B_MKI67	SEPHS1
PRPF19	1.70932e-37	0.46836	0.371	0.111	5.62213e-33	gc_B_MKI67	PRPF19
PMPCB	1.89631e-37	0.564216	0.545	0.222	6.23715e-33	gc_B_MKI67	PMPCB
VDAC3	1.98919e-37	0.587738	0.462	0.171	6.54264e-33	gc_B_MKI67	VDAC3
MRPL18	2.04885e-37	0.543483	0.534	0.22	6.73887e-33	gc_B_MKI67	MRPL18
CD81	2.68724e-37	0.848895	0.845	0.559	8.8386e-33	gc_B_MKI67	CD81
CD63	3.90718e-37	-1.13179	0.144	0.534	1.28511e-32	gc_B_MKI67	CD63
POLR2E	4.09285e-37	0.577738	0.568	0.241	1.34618e-32	gc_B_MKI67	POLR2E
ZFAS1	4.16156e-37	0.6235	0.913	0.482	1.36878e-32	gc_B_MKI67	ZFAS1
SF3B4	4.87374e-37	0.54071	0.473	0.17	1.60302e-32	gc_B_MKI67	SF3B4
MRPS36	5.01076e-37	0.557966	0.58	0.253	1.64809e-32	gc_B_MKI67	MRPS36
TMSB10	5.23397e-37	0.583747	1	0.952	1.7215e-32	gc_B_MKI67	TMSB10
FNTA	5.51089e-37	0.4654	0.496	0.179	1.81259e-32	gc_B_MKI67	FNTA
AK2	6.30967e-37	0.553659	0.534	0.221	2.07531e-32	gc_B_MKI67	AK2
BAZ1B	6.41343e-37	0.449526	0.42	0.133	2.10944e-32	gc_B_MKI67	BAZ1B
COX16	6.55457e-37	0.571534	0.663	0.327	2.15586e-32	gc_B_MKI67	COX16
MEA1	7.95653e-37	0.615838	0.561	0.249	2.61698e-32	gc_B_MKI67	MEA1
CLN6	8.33853e-37	0.45021	0.333	0.096	2.74263e-32	gc_B_MKI67	CLN6
RPS4Y1	1.0491e-36	0.600449	0.92	0.573	3.45059e-32	gc_B_MKI67	RPS4Y1
CD55	1.27527e-36	-1.44976	0.22	0.613	4.1945e-32	gc_B_MKI67	CD55
SYAP1	2.08753e-36	0.449405	0.538	0.205	6.86608e-32	gc_B_MKI67	SYAP1
EHD1	2.11772e-36	0.501121	0.413	0.134	6.96541e-32	gc_B_MKI67	EHD1
UBE2D2	2.17028e-36	0.695471	0.867	0.6	7.13826e-32	gc_B_MKI67	UBE2D2
POLD2	2.31834e-36	0.533603	0.398	0.133	7.62525e-32	gc_B_MKI67	POLD2
WIPF1	2.3637e-36	0.515974	0.701	0.311	7.77446e-32	gc_B_MKI67	WIPF1
EIF3K	2.4751e-36	0.617405	0.951	0.746	8.14085e-32	gc_B_MKI67	EIF3K
PRPSAP1	2.52582e-36	0.436606	0.326	0.092	8.30767e-32	gc_B_MKI67	PRPSAP1
TXNDC5	2.98162e-36	-2.10338	0.095	0.476	9.80685e-32	gc_B_MKI67	TXNDC5
NDUFB9	3.03219e-36	0.656261	0.754	0.436	9.97318e-32	gc_B_MKI67	NDUFB9
DDX27	3.37416e-36	0.418219	0.462	0.152	1.10979e-31	gc_B_MKI67	DDX27
FAM133B	3.42629e-36	0.413102	0.572	0.217	1.12694e-31	gc_B_MKI67	FAM133B
KPNB1	3.68207e-36	0.552414	0.61	0.262	1.21107e-31	gc_B_MKI67	KPNB1
LTB	4.05066e-36	0.942936	0.803	0.392	1.3323e-31	gc_B_MKI67	LTB
SEC11A	4.71995e-36	0.601902	0.701	0.381	1.55244e-31	gc_B_MKI67	SEC11A
MRPS15	5.08687e-36	0.633738	0.564	0.269	1.67312e-31	gc_B_MKI67	MRPS15
NDUFAB1	5.35583e-36	0.776681	0.678	0.397	1.76159e-31	gc_B_MKI67	NDUFAB1
RNASEK	5.74195e-36	-0.966511	0.121	0.562	1.88859e-31	gc_B_MKI67	RNASEK
NECAP2	6.13602e-36	0.453549	0.42	0.136	2.0182e-31	gc_B_MKI67	NECAP2
LRRFIP1	6.51891e-36	0.533466	0.712	0.305	2.14413e-31	gc_B_MKI67	LRRFIP1
TRA2A	8.51187e-36	0.459559	0.723	0.319	2.79964e-31	gc_B_MKI67	TRA2A
CCT7	9.04872e-36	0.730222	0.663	0.358	2.97621e-31	gc_B_MKI67	CCT7
TIMM10	9.68078e-36	0.55458	0.47	0.175	3.1841e-31	gc_B_MKI67	TIMM10
PDE4B	9.74821e-36	-1.32831	0.045	0.448	3.20628e-31	gc_B_MKI67	PDE4B
LRWD1	1.23909e-35	0.419826	0.314	0.087	4.07548e-31	gc_B_MKI67	LRWD1
MT-ND4	1.29284e-35	0.851899	0.977	0.925	4.25227e-31	gc_B_MKI67	MT-ND4
SREK1	1.48126e-35	0.512824	0.481	0.177	4.87201e-31	gc_B_MKI67	SREK1
SRPK1	1.76823e-35	0.480216	0.42	0.146	5.81588e-31	gc_B_MKI67	SRPK1
PRR13	2.01805e-35	0.529692	0.739	0.352	6.63757e-31	gc_B_MKI67	PRR13
NIFK	2.20865e-35	0.509033	0.417	0.14	7.26447e-31	gc_B_MKI67	NIFK
BAX	2.21615e-35	0.508928	0.727	0.353	7.28913e-31	gc_B_MKI67	BAX
DERL3	2.26106e-35	-2.50246	0.235	0.543	7.43685e-31	gc_B_MKI67	DERL3
TIAL1	2.30301e-35	0.479091	0.542	0.225	7.57482e-31	gc_B_MKI67	TIAL1
TMEM60	2.50421e-35	0.416269	0.326	0.09	8.2366e-31	gc_B_MKI67	TMEM60
ITM2B	2.51557e-35	-1.11547	0.265	0.642	8.27395e-31	gc_B_MKI67	ITM2B
PSMD1	2.54546e-35	0.432368	0.352	0.105	8.37226e-31	gc_B_MKI67	PSMD1
RPL9	2.61257e-35	0.681817	0.989	0.941	8.59301e-31	gc_B_MKI67	RPL9
ST13	2.6864e-35	0.601249	0.807	0.468	8.83585e-31	gc_B_MKI67	ST13
NDUFB10	2.86751e-35	0.694991	0.754	0.478	9.43154e-31	gc_B_MKI67	NDUFB10
TMEM167A	3.51377e-35	0.648357	0.557	0.264	1.15572e-30	gc_B_MKI67	TMEM167A
NME2	3.73497e-35	-0.826095	0.189	0.621	1.22847e-30	gc_B_MKI67	NME2
BTG2	3.79996e-35	-1.54475	0.473	0.705	1.24984e-30	gc_B_MKI67	BTG2
PSMC4	3.95339e-35	0.522507	0.538	0.235	1.30031e-30	gc_B_MKI67	PSMC4
ETFA	4.30025e-35	0.635952	0.564	0.262	1.41439e-30	gc_B_MKI67	ETFA
DNAJC15	4.63154e-35	0.623338	0.727	0.428	1.52336e-30	gc_B_MKI67	DNAJC15
SDHB	5.4294e-35	0.458098	0.47	0.179	1.78578e-30	gc_B_MKI67	SDHB
ATP6V0C	5.64954e-35	-0.916933	0.083	0.515	1.85819e-30	gc_B_MKI67	ATP6V0C
PSMC2	6.45083e-35	0.503688	0.428	0.156	2.12174e-30	gc_B_MKI67	PSMC2
ATP6V1G1	7.03332e-35	0.652295	0.936	0.685	2.31333e-30	gc_B_MKI67	ATP6V1G1
MRPL32	7.75721e-35	0.435869	0.402	0.135	2.55142e-30	gc_B_MKI67	MRPL32
MRPS21	8.93497e-35	0.678139	0.739	0.437	2.9388e-30	gc_B_MKI67	MRPS21
CREB3L2	1.0247e-34	-0.875602	0.004	0.392	3.37033e-30	gc_B_MKI67	CREB3L2
NR3C1	1.08939e-34	0.488185	0.591	0.248	3.58311e-30	gc_B_MKI67	NR3C1
ATP6V0D1	1.81466e-34	0.619485	0.587	0.271	5.96861e-30	gc_B_MKI67	ATP6V0D1
SRRT	1.97184e-34	0.440332	0.413	0.14	6.48558e-30	gc_B_MKI67	SRRT
PPP1CB	2.02362e-34	0.43529	0.561	0.213	6.6559e-30	gc_B_MKI67	PPP1CB
EEF1G	2.31392e-34	-1.1293	0.527	0.817	7.61072e-30	gc_B_MKI67	EEF1G
GGNBP2	2.86985e-34	0.616011	0.629	0.289	9.43921e-30	gc_B_MKI67	GGNBP2
CAMTA1	2.89509e-34	0.612067	0.568	0.269	9.52225e-30	gc_B_MKI67	CAMTA1
TMEM14B	3.14569e-34	0.618328	0.64	0.33	1.03465e-29	gc_B_MKI67	TMEM14B
PLPP5	3.24255e-34	-0.800078	0.019	0.405	1.06651e-29	gc_B_MKI67	PLPP5
ARHGDIA	4.75304e-34	0.680528	0.708	0.397	1.56332e-29	gc_B_MKI67	ARHGDIA
NOP53	5.39122e-34	-1.17773	0.091	0.499	1.77323e-29	gc_B_MKI67	NOP53
KRTCAP2	5.4635e-34	-1.29893	0.379	0.629	1.797e-29	gc_B_MKI67	KRTCAP2
UQCC2	6.16076e-34	0.54689	0.485	0.203	2.02633e-29	gc_B_MKI67	UQCC2
ELL2	6.88408e-34	-1.03822	0.042	0.436	2.26424e-29	gc_B_MKI67	ELL2
HDDC2	1.04212e-33	0.47857	0.436	0.162	3.42764e-29	gc_B_MKI67	HDDC2
LSM7	1.44784e-33	0.552521	0.852	0.542	4.76208e-29	gc_B_MKI67	LSM7
RTF1	1.68477e-33	0.550946	0.549	0.236	5.54139e-29	gc_B_MKI67	RTF1
SPAG4	1.72164e-33	-0.858326	0.004	0.383	5.66263e-29	gc_B_MKI67	SPAG4
FLOT1	1.74213e-33	0.608046	0.485	0.202	5.73004e-29	gc_B_MKI67	FLOT1
IFITM1	1.87432e-33	-1.31097	0.027	0.413	6.16484e-29	gc_B_MKI67	IFITM1
PAPOLA	2.34048e-33	0.62955	0.75	0.434	7.69808e-29	gc_B_MKI67	PAPOLA
RGS2	2.3755e-33	0.548773	0.67	0.296	7.81326e-29	gc_B_MKI67	RGS2
MDH2	2.70335e-33	0.711569	0.705	0.425	8.89157e-29	gc_B_MKI67	MDH2
NDUFS7	2.84248e-33	0.646503	0.686	0.394	9.34921e-29	gc_B_MKI67	NDUFS7
ENSA	2.86376e-33	0.556752	0.727	0.396	9.41919e-29	gc_B_MKI67	ENSA
AHNAK	3.07704e-33	-1.20232	0.011	0.389	1.01207e-28	gc_B_MKI67	AHNAK
C19orf53	3.36895e-33	0.60262	0.826	0.532	1.10808e-28	gc_B_MKI67	C19orf53
HLA-DOB	3.65614e-33	0.535961	0.644	0.296	1.20254e-28	gc_B_MKI67	HLA-DOB
GRB2	4.14817e-33	0.554345	0.784	0.444	1.36437e-28	gc_B_MKI67	GRB2
CPSF6	5.09997e-33	0.494855	0.508	0.203	1.67743e-28	gc_B_MKI67	CPSF6
MED4	5.55388e-33	0.485016	0.485	0.19	1.82673e-28	gc_B_MKI67	MED4
RAD9A	6.5599e-33	0.414655	0.36	0.116	2.15762e-28	gc_B_MKI67	RAD9A
SNRNP70	7.62505e-33	0.639862	0.659	0.355	2.50795e-28	gc_B_MKI67	SNRNP70
PTPRCAP	7.89285e-33	0.636534	0.977	0.809	2.59604e-28	gc_B_MKI67	PTPRCAP
PDHB	9.56544e-33	0.504939	0.436	0.164	3.14617e-28	gc_B_MKI67	PDHB
GPX1P1	9.90853e-33	-0.653199	0.064	0.457	3.25902e-28	gc_B_MKI67	GPX1P1
NDUFA8	1.02209e-32	0.539058	0.455	0.189	3.36175e-28	gc_B_MKI67	NDUFA8
IGKC	1.38038e-32	-5.51579	0.068	0.436	4.54021e-28	gc_B_MKI67	IGKC
CDK4	1.46701e-32	0.687931	0.485	0.216	4.82513e-28	gc_B_MKI67	CDK4
MRPL52	1.58204e-32	0.611498	0.739	0.441	5.20348e-28	gc_B_MKI67	MRPL52
EIF2S1	1.6308e-32	0.440429	0.424	0.155	5.36385e-28	gc_B_MKI67	EIF2S1
MARCKSL1	1.84426e-32	1.0515	0.587	0.252	6.06595e-28	gc_B_MKI67	MARCKSL1
MRPL54	2.65914e-32	0.582129	0.625	0.324	8.74616e-28	gc_B_MKI67	MRPL54
SELENOS	3.20399e-32	-0.844493	0.038	0.408	1.05382e-27	gc_B_MKI67	SELENOS
NR4A1	3.25751e-32	-1.78941	0.17	0.533	1.07143e-27	gc_B_MKI67	NR4A1
MYDGF	3.60971e-32	-0.909875	0.049	0.422	1.18727e-27	gc_B_MKI67	MYDGF
KLHL6	3.61961e-32	0.652833	0.629	0.33	1.19053e-27	gc_B_MKI67	KLHL6
ATP5F1D	4.31316e-32	-0.707679	0.129	0.575	1.41864e-27	gc_B_MKI67	ATP5F1D
YBEY	4.51745e-32	0.48344	0.39	0.134	1.48583e-27	gc_B_MKI67	YBEY
APIP	4.62975e-32	0.428915	0.356	0.118	1.52277e-27	gc_B_MKI67	APIP
RPL24	6.16202e-32	0.540083	0.996	0.963	2.02675e-27	gc_B_MKI67	RPL24
RPL5	7.22176e-32	0.546358	0.996	0.97	2.37531e-27	gc_B_MKI67	RPL5
GPR183	7.78463e-32	-1.90301	0.076	0.444	2.56044e-27	gc_B_MKI67	GPR183
ZC3H15	9.5448e-32	0.520546	0.652	0.325	3.13938e-27	gc_B_MKI67	ZC3H15
G3BP1	1.08876e-31	0.441204	0.481	0.185	3.58105e-27	gc_B_MKI67	G3BP1
TPM4	1.23261e-31	0.629489	0.701	0.391	4.05418e-27	gc_B_MKI67	TPM4
ARID4B	1.28022e-31	0.567026	0.629	0.28	4.21078e-27	gc_B_MKI67	ARID4B
GNL1	1.50717e-31	0.469933	0.413	0.149	4.95724e-27	gc_B_MKI67	GNL1
MRPS33	1.58385e-31	0.517337	0.496	0.22	5.20943e-27	gc_B_MKI67	MRPS33
WASF2	1.83242e-31	0.440797	0.614	0.272	6.027e-27	gc_B_MKI67	WASF2
RPL14	2.09868e-31	0.544922	1	0.976	6.90278e-27	gc_B_MKI67	RPL14
PHB2	2.35901e-31	0.631473	0.712	0.418	7.75903e-27	gc_B_MKI67	PHB2
SH3KBP1	2.35979e-31	0.433719	0.519	0.198	7.76157e-27	gc_B_MKI67	SH3KBP1
CAMLG	3.58752e-31	0.431823	0.47	0.179	1.17997e-26	gc_B_MKI67	CAMLG
ELF1	4.3939e-31	0.509766	0.826	0.447	1.4452e-26	gc_B_MKI67	ELF1
RAP1A	5.32946e-31	0.588287	0.663	0.352	1.75291e-26	gc_B_MKI67	RAP1A
GGH	5.62183e-31	0.433758	0.337	0.113	1.84908e-26	gc_B_MKI67	GGH
MRPL23	6.2807e-31	0.654204	0.655	0.372	2.06579e-26	gc_B_MKI67	MRPL23
CBWD1	6.65538e-31	0.480365	0.409	0.156	2.18902e-26	gc_B_MKI67	CBWD1
USP34	7.32684e-31	0.413435	0.451	0.164	2.40987e-26	gc_B_MKI67	USP34
GIT2	7.59489e-31	0.408633	0.398	0.132	2.49804e-26	gc_B_MKI67	GIT2
RAB5C	9.58751e-31	0.491947	0.58	0.268	3.15343e-26	gc_B_MKI67	RAB5C
RPA2	1.10826e-30	0.411592	0.485	0.186	3.64517e-26	gc_B_MKI67	RPA2
RPS3A	1.15396e-30	0.589239	1	0.979	3.7955e-26	gc_B_MKI67	RPS3A
TIMM17A	1.18782e-30	0.459388	0.466	0.195	3.90685e-26	gc_B_MKI67	TIMM17A
MRFAP1	1.23621e-30	0.501453	0.523	0.23	4.06602e-26	gc_B_MKI67	MRFAP1
PRDM1	1.60331e-30	-1.06363	0.038	0.402	5.27346e-26	gc_B_MKI67	PRDM1
NDUFC1	2.06865e-30	0.601955	0.644	0.365	6.804e-26	gc_B_MKI67	NDUFC1
HLA-DPA1	2.65705e-30	0.712181	0.985	0.727	8.7393e-26	gc_B_MKI67	HLA-DPA1
S100A6	2.86518e-30	-1.09748	0.14	0.506	9.42386e-26	gc_B_MKI67	S100A6
MRPS34	2.98105e-30	0.654051	0.617	0.352	9.80496e-26	gc_B_MKI67	MRPS34
MT-ND1	3.31068e-30	0.782259	0.985	0.912	1.08892e-25	gc_B_MKI67	MT-ND1
GPANK1	3.58484e-30	0.417151	0.371	0.127	1.17909e-25	gc_B_MKI67	GPANK1
IDH3G	3.81879e-30	0.44778	0.477	0.206	1.25604e-25	gc_B_MKI67	IDH3G
TP53INP1	4.22797e-30	-1.02427	0.08	0.445	1.39062e-25	gc_B_MKI67	TP53INP1
BCL6	4.28474e-30	0.44013	0.28	0.075	1.40929e-25	gc_B_MKI67	BCL6
MEAF6	4.41283e-30	0.471355	0.572	0.253	1.45143e-25	gc_B_MKI67	MEAF6
PIH1D1	5.03634e-30	0.470663	0.508	0.229	1.6565e-25	gc_B_MKI67	PIH1D1
RPS10	5.0716e-30	0.496447	0.97	0.81	1.6681e-25	gc_B_MKI67	RPS10
PSMD7	6.53114e-30	0.536869	0.614	0.328	2.14816e-25	gc_B_MKI67	PSMD7
TAF7	6.59253e-30	0.429521	0.693	0.327	2.16835e-25	gc_B_MKI67	TAF7
CYB5R3	7.30202e-30	0.499562	0.504	0.221	2.40171e-25	gc_B_MKI67	CYB5R3
NDUFS2	7.73847e-30	0.420643	0.455	0.187	2.54526e-25	gc_B_MKI67	NDUFS2
PRDX4	7.96253e-30	-1.40774	0.167	0.481	2.61895e-25	gc_B_MKI67	PRDX4
EIF2S3	9.57159e-30	0.445012	0.667	0.324	3.14819e-25	gc_B_MKI67	EIF2S3
UBXN1	1.06808e-29	0.510597	0.803	0.47	3.51303e-25	gc_B_MKI67	UBXN1
RPL26	1.41816e-29	0.599809	0.996	0.98	4.66446e-25	gc_B_MKI67	RPL26
CD9	1.73789e-29	0.533578	0.269	0.077	5.71611e-25	gc_B_MKI67	CD9
NKTR	1.77021e-29	0.429242	0.553	0.234	5.82238e-25	gc_B_MKI67	NKTR
NDUFS8	1.91655e-29	0.5671	0.667	0.403	6.30373e-25	gc_B_MKI67	NDUFS8
BTG1	1.96425e-29	-2.43029	0.663	0.851	6.4606e-25	gc_B_MKI67	BTG1
COPS6	2.2181e-29	0.548102	0.591	0.313	7.29556e-25	gc_B_MKI67	COPS6
DNAJA2	2.77838e-29	0.432537	0.485	0.197	9.13835e-25	gc_B_MKI67	DNAJA2
PIM2	3.19398e-29	-1.20453	0.167	0.511	1.05053e-24	gc_B_MKI67	PIM2
LAMTOR1	3.62533e-29	0.526866	0.644	0.343	1.19241e-24	gc_B_MKI67	LAMTOR1
NAA20	3.661e-29	0.461851	0.462	0.201	1.20414e-24	gc_B_MKI67	NAA20
ANXA5	4.09964e-29	0.625641	0.64	0.367	1.34841e-24	gc_B_MKI67	ANXA5
HARS	4.78756e-29	0.435374	0.371	0.133	1.57468e-24	gc_B_MKI67	HARS
ZNHIT1	5.09731e-29	0.543919	0.598	0.33	1.67656e-24	gc_B_MKI67	ZNHIT1
FRG1	5.62172e-29	0.43502	0.367	0.129	1.84904e-24	gc_B_MKI67	FRG1
RABGAP1L	7.67698e-29	0.478705	0.629	0.314	2.52504e-24	gc_B_MKI67	RABGAP1L
DNAJC1	8.2442e-29	-0.638895	0.045	0.404	2.7116e-24	gc_B_MKI67	DNAJC1
ERN1	8.32383e-29	-0.892944	0.004	0.342	2.73779e-24	gc_B_MKI67	ERN1
RBM39	1.0433e-28	0.534452	0.89	0.622	3.43153e-24	gc_B_MKI67	RBM39
RPL8	1.15023e-28	0.458262	1	0.988	3.78321e-24	gc_B_MKI67	RPL8
ASNA1	1.18856e-28	0.470779	0.443	0.186	3.9093e-24	gc_B_MKI67	ASNA1
EMC6	1.25295e-28	0.519866	0.545	0.279	4.12109e-24	gc_B_MKI67	EMC6
SUZ12	1.43232e-28	0.43317	0.424	0.165	4.71105e-24	gc_B_MKI67	SUZ12
2024-09-01	1.43748e-28	0.430109	0.693	0.357	4.72802e-24	gc_B_MKI67	2024-09-01
YTHDF2	1.49133e-28	0.477642	0.489	0.213	4.90514e-24	gc_B_MKI67	YTHDF2
ARF1	1.59667e-28	0.516712	0.848	0.581	5.2516e-24	gc_B_MKI67	ARF1
NDUFB11	2.3576e-28	0.576876	0.894	0.666	7.75438e-24	gc_B_MKI67	NDUFB11
EIF5B	2.61298e-28	0.489668	0.614	0.315	8.59436e-24	gc_B_MKI67	EIF5B
TMEM50A	2.6621e-28	0.544986	0.629	0.356	8.75593e-24	gc_B_MKI67	TMEM50A
GTF3C6	2.67545e-28	0.459242	0.504	0.226	8.79981e-24	gc_B_MKI67	GTF3C6
HDAC2	3.28856e-28	0.425683	0.405	0.153	1.08164e-23	gc_B_MKI67	HDAC2
HNRNPDL	4.57289e-28	0.514392	0.92	0.679	1.50407e-23	gc_B_MKI67	HNRNPDL
HADHA	6.14281e-28	0.47339	0.564	0.266	2.02043e-23	gc_B_MKI67	HADHA
SH3BGRL3	8.60723e-28	0.474718	0.939	0.72	2.83101e-23	gc_B_MKI67	SH3BGRL3
USP16	9.26048e-28	0.430929	0.519	0.234	3.04587e-23	gc_B_MKI67	USP16
CITED2	1.03668e-27	-1.68958	0.087	0.425	3.40973e-23	gc_B_MKI67	CITED2
UPF3A	1.05052e-27	0.426499	0.436	0.174	3.45527e-23	gc_B_MKI67	UPF3A
PRRC2C	1.12333e-27	0.438312	0.765	0.421	3.69475e-23	gc_B_MKI67	PRRC2C
COX14	1.34153e-27	0.55683	0.595	0.311	4.41242e-23	gc_B_MKI67	COX14
SRSF5	1.45856e-27	0.42651	0.875	0.553	4.79733e-23	gc_B_MKI67	SRSF5
PDCD6	1.83856e-27	0.509383	0.598	0.305	6.0472e-23	gc_B_MKI67	PDCD6
PSAP	1.90102e-27	-0.964848	0.307	0.609	6.25266e-23	gc_B_MKI67	PSAP
FOSB	1.92641e-27	-1.39472	0.386	0.658	6.33616e-23	gc_B_MKI67	FOSB
RPS5	2.17646e-27	0.467528	1	0.975	7.1586e-23	gc_B_MKI67	RPS5
MTX1	2.26137e-27	0.461928	0.398	0.167	7.43788e-23	gc_B_MKI67	MTX1
TRABD	2.71206e-27	0.594648	0.648	0.381	8.92025e-23	gc_B_MKI67	TRABD
MTHFD2	2.99361e-27	0.660231	0.496	0.247	9.84627e-23	gc_B_MKI67	MTHFD2
CCM2	3.20269e-27	0.499648	0.511	0.253	1.0534e-22	gc_B_MKI67	CCM2
GSTO1	3.42966e-27	0.488009	0.5	0.223	1.12805e-22	gc_B_MKI67	GSTO1
CD19	4.11951e-27	0.476	0.769	0.414	1.35495e-22	gc_B_MKI67	CD19
DUSP5	4.80626e-27	-1.38142	0.034	0.359	1.58083e-22	gc_B_MKI67	DUSP5
NCOR1	5.12045e-27	0.457397	0.64	0.325	1.68417e-22	gc_B_MKI67	NCOR1
RAB4A	6.73732e-27	0.428563	0.447	0.193	2.21597e-22	gc_B_MKI67	RAB4A
ATP6V1F	7.34591e-27	0.520616	0.701	0.419	2.41614e-22	gc_B_MKI67	ATP6V1F
SCAND1	8.10722e-27	0.574228	0.716	0.446	2.66654e-22	gc_B_MKI67	SCAND1
UQCRC1	9.59151e-27	0.511271	0.591	0.329	3.15474e-22	gc_B_MKI67	UQCRC1
COA3	1.1667e-26	0.503214	0.489	0.239	3.83739e-22	gc_B_MKI67	COA3
VPS37B	1.23371e-26	-0.949179	0.008	0.326	4.0578e-22	gc_B_MKI67	VPS37B
ATOX1	1.32081e-26	0.528147	0.602	0.349	4.34428e-22	gc_B_MKI67	ATOX1
VIM	1.32456e-26	-1.24855	0.5	0.731	4.3566e-22	gc_B_MKI67	VIM
PHB	1.32731e-26	0.662683	0.53	0.274	4.36566e-22	gc_B_MKI67	PHB
SRGN	1.33166e-26	-1.21394	0.545	0.717	4.37997e-22	gc_B_MKI67	SRGN
SDC1	1.40559e-26	-0.628507	0.004	0.321	4.62313e-22	gc_B_MKI67	SDC1
NR4A2	1.48052e-26	-1.66758	0.114	0.435	4.86959e-22	gc_B_MKI67	NR4A2
XBP1	1.71663e-26	-2.04943	0.307	0.538	5.64618e-22	gc_B_MKI67	XBP1
MRPS7	1.96449e-26	0.484543	0.492	0.228	6.4614e-22	gc_B_MKI67	MRPS7
TXNL1	2.21153e-26	0.492093	0.557	0.292	7.27393e-22	gc_B_MKI67	TXNL1
MT-ND6	2.91925e-26	-1.1833	0.235	0.563	9.60171e-22	gc_B_MKI67	MT-ND6
EIF3J	2.98071e-26	0.415586	0.447	0.187	9.80386e-22	gc_B_MKI67	EIF3J
MSI2	3.1123e-26	0.460044	0.485	0.226	1.02367e-21	gc_B_MKI67	MSI2
FXR1	3.50551e-26	0.47781	0.5	0.224	1.153e-21	gc_B_MKI67	FXR1
PPP6C	5.0548e-26	0.443978	0.5	0.238	1.66257e-21	gc_B_MKI67	PPP6C
H1FX	5.27577e-26	-1.68854	0.125	0.463	1.73525e-21	gc_B_MKI67	H1FX
AC020916.1	5.37201e-26	-0.784381	0	0.31	1.76691e-21	gc_B_MKI67	AC020916.1
RAB7A	5.95388e-26	0.429816	0.625	0.333	1.95829e-21	gc_B_MKI67	RAB7A
PTPRC	7.77771e-26	0.472556	0.848	0.476	2.55817e-21	gc_B_MKI67	PTPRC
JSRP1	1.02829e-25	-1.11158	0.023	0.337	3.38214e-21	gc_B_MKI67	JSRP1
MAGEF1	1.09092e-25	0.443439	0.341	0.13	3.58814e-21	gc_B_MKI67	MAGEF1
TRAPPC2L	1.3576e-25	0.47898	0.481	0.236	4.46528e-21	gc_B_MKI67	TRAPPC2L
FP236383.1	1.57536e-25	-4.01797	0.03	0.348	5.18151e-21	gc_B_MKI67	FP236383.1
CHURC1	1.80593e-25	0.422576	0.636	0.327	5.93987e-21	gc_B_MKI67	CHURC1
HNRNPAB	2.16681e-25	0.628431	0.466	0.217	7.12684e-21	gc_B_MKI67	HNRNPAB
RSL24D1	2.2253e-25	0.479071	0.75	0.461	7.31922e-21	gc_B_MKI67	RSL24D1
MT-ATP6	2.4464e-25	0.611236	0.985	0.894	8.04647e-21	gc_B_MKI67	MT-ATP6
BOLA3	2.55976e-25	0.42387	0.371	0.152	8.41931e-21	gc_B_MKI67	BOLA3
NDUFB7	2.63688e-25	0.54492	0.735	0.486	8.67297e-21	gc_B_MKI67	NDUFB7
MEI1	3.29002e-25	-0.534551	0.027	0.344	1.08212e-20	gc_B_MKI67	MEI1
FP671120.1	3.36791e-25	-3.44888	0.03	0.345	1.10774e-20	gc_B_MKI67	FP671120.1
SAP30BP	3.92789e-25	0.450621	0.496	0.239	1.29192e-20	gc_B_MKI67	SAP30BP
ARSA	4.08427e-25	-0.534093	0.053	0.374	1.34336e-20	gc_B_MKI67	ARSA
HSPA1B	4.7741e-25	-2.3843	0.08	0.402	1.57025e-20	gc_B_MKI67	HSPA1B
LAP3	6.86218e-25	0.524191	0.485	0.246	2.25704e-20	gc_B_MKI67	LAP3
DANCR	6.94678e-25	-0.632582	0.087	0.431	2.28487e-20	gc_B_MKI67	DANCR
GNG7	7.32742e-25	-0.932946	0.178	0.527	2.41006e-20	gc_B_MKI67	GNG7
LIME1	7.65847e-25	-0.49861	0.015	0.321	2.51895e-20	gc_B_MKI67	LIME1
SRI	8.37585e-25	0.636217	0.598	0.343	2.7549e-20	gc_B_MKI67	SRI
PEBP1	9.7029e-25	0.611955	0.723	0.496	3.19138e-20	gc_B_MKI67	PEBP1
MARCKS	1.05736e-24	-0.86614	0.057	0.376	3.47776e-20	gc_B_MKI67	MARCKS
EEF1A1P5	1.2194e-24	-1.06418	0.083	0.411	4.01072e-20	gc_B_MKI67	EEF1A1P5
PNISR	1.25082e-24	0.48975	0.807	0.51	4.11408e-20	gc_B_MKI67	PNISR
UQCR11	1.55056e-24	-0.540966	0.129	0.505	5.09995e-20	gc_B_MKI67	UQCR11
PFKL	2.32105e-24	0.443337	0.432	0.192	7.63415e-20	gc_B_MKI67	PFKL
PDCD4	2.3394e-24	-0.874754	0.114	0.44	7.69452e-20	gc_B_MKI67	PDCD4
FNDC3B	2.55347e-24	-0.674218	0.011	0.31	8.39863e-20	gc_B_MKI67	FNDC3B
IGHA2	2.92823e-24	-3.95763	0.023	0.323	9.63125e-20	gc_B_MKI67	IGHA2
NUBP2	3.14653e-24	0.406452	0.383	0.157	1.03492e-19	gc_B_MKI67	NUBP2
CDKN1A	3.33868e-24	-0.992507	0.045	0.356	1.09812e-19	gc_B_MKI67	CDKN1A
SELENOH	3.48673e-24	-0.616159	0.121	0.489	1.14682e-19	gc_B_MKI67	SELENOH
MRPL20	3.59661e-24	0.596434	0.633	0.402	1.18296e-19	gc_B_MKI67	MRPL20
HSPA8	4.59203e-24	0.424985	0.943	0.748	1.51037e-19	gc_B_MKI67	HSPA8
RBM42	5.63256e-24	0.420837	0.417	0.18	1.85261e-19	gc_B_MKI67	RBM42
PKHD1L1	5.93615e-24	0.431415	0.337	0.132	1.95246e-19	gc_B_MKI67	PKHD1L1
SNU13	6.05471e-24	-0.571887	0.125	0.488	1.99145e-19	gc_B_MKI67	SNU13
HNRNPUL1	6.17613e-24	0.440082	0.602	0.328	2.03139e-19	gc_B_MKI67	HNRNPUL1
HM13	6.4655e-24	-0.822643	0.178	0.479	2.12657e-19	gc_B_MKI67	HM13
SPTSSA	6.49197e-24	0.457954	0.36	0.15	2.13527e-19	gc_B_MKI67	SPTSSA
IFITM2	6.77868e-24	-1.30651	0.174	0.482	2.22958e-19	gc_B_MKI67	IFITM2
DNAJB9	8.1314e-24	-0.812371	0.14	0.461	2.6745e-19	gc_B_MKI67	DNAJB9
MT-ND2	1.07241e-23	0.744193	0.951	0.886	3.52726e-19	gc_B_MKI67	MT-ND2
NME1	1.41349e-23	0.759949	0.447	0.232	4.64911e-19	gc_B_MKI67	NME1
IGKV3-20	1.53489e-23	-6.39872	0.042	0.349	5.04842e-19	gc_B_MKI67	IGKV3-20
NOL7	1.78826e-23	0.491307	0.648	0.393	5.88175e-19	gc_B_MKI67	NOL7
UBC	1.9904e-23	-0.922578	0.989	0.944	6.54663e-19	gc_B_MKI67	UBC
ZBP1	2.10176e-23	-0.518046	0	0.284	6.91291e-19	gc_B_MKI67	ZBP1
YPEL3	2.11504e-23	-0.821142	0.22	0.548	6.95657e-19	gc_B_MKI67	YPEL3
HIGD2A	2.50299e-23	0.449364	0.78	0.542	8.2326e-19	gc_B_MKI67	HIGD2A
PARVB	2.57092e-23	-0.547694	0.023	0.319	8.45601e-19	gc_B_MKI67	PARVB
HIPK2	2.57832e-23	-0.923893	0.03	0.326	8.48037e-19	gc_B_MKI67	HIPK2
DCTN2	2.91135e-23	0.518142	0.466	0.239	9.57572e-19	gc_B_MKI67	DCTN2
CHPF	3.37018e-23	-0.470264	0.027	0.32	1.10848e-18	gc_B_MKI67	CHPF
LINC02362	3.39958e-23	-0.597126	0	0.282	1.11816e-18	gc_B_MKI67	LINC02362
IRF9	4.36929e-23	0.414469	0.273	0.088	1.4371e-18	gc_B_MKI67	IRF9
TYMP	7.1595e-23	-0.680467	0.03	0.325	2.35483e-18	gc_B_MKI67	TYMP
DECR1	9.46067e-23	0.437625	0.492	0.246	3.11171e-18	gc_B_MKI67	DECR1
LRRC75A-AS1	1.14782e-22	-0.494808	0.14	0.521	3.77528e-18	gc_B_MKI67	LRRC75A-AS1
CLPP	1.15947e-22	0.42771	0.462	0.235	3.81361e-18	gc_B_MKI67	CLPP
ATF4	1.31874e-22	0.507423	0.652	0.41	4.33747e-18	gc_B_MKI67	ATF4
RBM25	1.54482e-22	0.443298	0.636	0.357	5.08108e-18	gc_B_MKI67	RBM25
SRM	1.60309e-22	-0.581547	0.098	0.407	5.27273e-18	gc_B_MKI67	SRM
POLR2F	1.62937e-22	0.451956	0.473	0.239	5.35916e-18	gc_B_MKI67	POLR2F
HINT2	1.82762e-22	0.438002	0.508	0.279	6.01123e-18	gc_B_MKI67	HINT2
NENF	1.90076e-22	-0.568825	0.087	0.402	6.25179e-18	gc_B_MKI67	NENF
SDF4	2.47973e-22	-0.539905	0.064	0.368	8.1561e-18	gc_B_MKI67	SDF4
HLA-DPB1	2.48273e-22	0.471892	0.97	0.542	8.16594e-18	gc_B_MKI67	HLA-DPB1
HSPA1A	2.72026e-22	-2.79256	0.057	0.345	8.94721e-18	gc_B_MKI67	HSPA1A
AP3S1	3.43912e-22	0.525763	0.625	0.389	1.13116e-17	gc_B_MKI67	AP3S1
MRPL41	3.64762e-22	0.519302	0.602	0.364	1.19974e-17	gc_B_MKI67	MRPL41
AC090498.1	5.43292e-22	-2.30253	0.023	0.298	1.78694e-17	gc_B_MKI67	AC090498.1
REX1BD	5.45343e-22	-0.620407	0.076	0.378	1.79369e-17	gc_B_MKI67	REX1BD
AC007384.1	5.48447e-22	-0.739448	0.034	0.322	1.8039e-17	gc_B_MKI67	AC007384.1
PSMD12	7.01505e-22	0.405533	0.383	0.167	2.30732e-17	gc_B_MKI67	PSMD12
ADI1	8.7991e-22	0.552219	0.473	0.263	2.89411e-17	gc_B_MKI67	ADI1
CCDC90B	1.06942e-21	0.439084	0.409	0.189	3.51743e-17	gc_B_MKI67	CCDC90B
SRPRA	1.11963e-21	-0.530599	0.068	0.365	3.68257e-17	gc_B_MKI67	SRPRA
PSMB6	1.30638e-21	0.554387	0.693	0.484	4.29683e-17	gc_B_MKI67	PSMB6
CHMP2A	1.35432e-21	0.52814	0.523	0.299	4.45449e-17	gc_B_MKI67	CHMP2A
RPS19BP1	1.39719e-21	0.516329	0.61	0.384	4.59548e-17	gc_B_MKI67	RPS19BP1
NDUFV1	1.48203e-21	0.478813	0.583	0.364	4.87454e-17	gc_B_MKI67	NDUFV1
SRSF4	1.57887e-21	0.41889	0.538	0.285	5.19305e-17	gc_B_MKI67	SRSF4
SRP19	1.79462e-21	0.440136	0.477	0.249	5.90268e-17	gc_B_MKI67	SRP19
LINC01578	2.16347e-21	-0.845875	0.102	0.411	7.11586e-17	gc_B_MKI67	LINC01578
POLR2I	3.00682e-21	0.457571	0.504	0.274	9.88972e-17	gc_B_MKI67	POLR2I
ROMO1	3.19068e-21	0.526081	0.693	0.471	1.04945e-16	gc_B_MKI67	ROMO1
COA1	4.14364e-21	0.47037	0.458	0.222	1.36288e-16	gc_B_MKI67	COA1
TIMP1	4.90665e-21	-1.05974	0.038	0.308	1.61385e-16	gc_B_MKI67	TIMP1
SHMT2	4.99008e-21	0.507086	0.485	0.269	1.64129e-16	gc_B_MKI67	SHMT2
RPL18A	5.57887e-21	0.41575	0.996	0.985	1.83494e-16	gc_B_MKI67	RPL18A
GNB1	5.59319e-21	0.417227	0.523	0.273	1.83966e-16	gc_B_MKI67	GNB1
CYTOR	9.04795e-21	-0.784377	0.042	0.317	2.97596e-16	gc_B_MKI67	CYTOR
RPS15	1.23767e-20	0.430731	1	0.989	4.07082e-16	gc_B_MKI67	RPS15
ETV6	1.26952e-20	-0.687383	0.034	0.306	4.17557e-16	gc_B_MKI67	ETV6
DUSP2	1.39418e-20	-1.75981	0.148	0.42	4.58561e-16	gc_B_MKI67	DUSP2
TMEM238	1.63482e-20	-0.434858	0.038	0.311	5.3771e-16	gc_B_MKI67	TMEM238
CDC37	1.84508e-20	0.425678	0.686	0.446	6.06866e-16	gc_B_MKI67	CDC37
IER2	1.91377e-20	-1.37953	0.383	0.608	6.29459e-16	gc_B_MKI67	IER2
RPL41P1	2.4609e-20	-1.9059	0.03	0.304	8.09416e-16	gc_B_MKI67	RPL41P1
FAM3C	2.52444e-20	0.560112	0.621	0.39	8.30315e-16	gc_B_MKI67	FAM3C
FNDC3A	2.60952e-20	-0.530119	0.045	0.321	8.58297e-16	gc_B_MKI67	FNDC3A
IGKV4-1	3.01562e-20	-6.78302	0.042	0.308	9.91866e-16	gc_B_MKI67	IGKV4-1
RWDD1	4.08727e-20	0.426746	0.606	0.366	1.34434e-15	gc_B_MKI67	RWDD1
NME3	4.50086e-20	-0.566383	0.072	0.348	1.48038e-15	gc_B_MKI67	NME3
AC007569.1	5.23588e-20	-0.590011	0.008	0.26	1.72213e-15	gc_B_MKI67	AC007569.1
HLA-DQB1	6.03481e-20	0.504082	0.913	0.578	1.98491e-15	gc_B_MKI67	HLA-DQB1
NELFE	7.99766e-20	0.410705	0.409	0.202	2.63051e-15	gc_B_MKI67	NELFE
CD164	8.85024e-20	0.415731	0.652	0.408	2.91093e-15	gc_B_MKI67	CD164
CDKN1B	8.95943e-20	-0.695408	0.121	0.416	2.94685e-15	gc_B_MKI67	CDKN1B
RHOB	1.06701e-19	-1.20362	0.095	0.362	3.50951e-15	gc_B_MKI67	RHOB
FXYD5	1.07049e-19	-1.1351	0.473	0.684	3.52096e-15	gc_B_MKI67	FXYD5
SLAMF7	1.09308e-19	-0.498392	0.049	0.312	3.59524e-15	gc_B_MKI67	SLAMF7
SQSTM1	1.10412e-19	-1.02576	0.364	0.607	3.63157e-15	gc_B_MKI67	SQSTM1
NAXE	1.31883e-19	-0.453626	0.057	0.337	4.33776e-15	gc_B_MKI67	NAXE
TRIR	1.62377e-19	-0.416033	0.136	0.476	5.34073e-15	gc_B_MKI67	TRIR
BCL2	1.78737e-19	-0.708697	0.004	0.249	5.87883e-15	gc_B_MKI67	BCL2
CTSH	1.93266e-19	0.499522	0.678	0.438	6.35671e-15	gc_B_MKI67	CTSH
TRIB1	2.28137e-19	-0.72005	0.057	0.324	7.50364e-15	gc_B_MKI67	TRIB1
ATG3	2.59269e-19	0.443921	0.466	0.253	8.52763e-15	gc_B_MKI67	ATG3
HLA-DRA	2.91049e-19	0.53593	0.996	0.58	9.57291e-15	gc_B_MKI67	HLA-DRA
ANKRD36BP2	3.14168e-19	-0.563555	0.019	0.27	1.03333e-14	gc_B_MKI67	ANKRD36BP2
ARL5A	4.05797e-19	0.477161	0.538	0.305	1.33471e-14	gc_B_MKI67	ARL5A
ISG20	4.76652e-19	0.621303	0.928	0.734	1.56776e-14	gc_B_MKI67	ISG20
CHPT1	5.06034e-19	-0.785049	0.011	0.256	1.6644e-14	gc_B_MKI67	CHPT1
ADGRE5	6.59835e-19	-0.814055	0.015	0.26	2.17026e-14	gc_B_MKI67	ADGRE5
FCMR	6.88457e-19	-1.23927	0.019	0.261	2.2644e-14	gc_B_MKI67	FCMR
IGLV3-1	7.06797e-19	-4.31479	0.045	0.311	2.32472e-14	gc_B_MKI67	IGLV3-1
PSMB9	7.23913e-19	0.469772	0.784	0.577	2.38102e-14	gc_B_MKI67	PSMB9
CHST11	8.32022e-19	-0.660276	0.034	0.287	2.7366e-14	gc_B_MKI67	CHST11
TARSL2	8.55682e-19	-0.553735	0.03	0.283	2.81443e-14	gc_B_MKI67	TARSL2
ZNF706	9.03483e-19	0.461938	0.754	0.554	2.97164e-14	gc_B_MKI67	ZNF706
ANAPC5	9.73704e-19	0.43026	0.583	0.371	3.20261e-14	gc_B_MKI67	ANAPC5
MRPS24	1.0496e-18	-0.470786	0.095	0.384	3.45224e-14	gc_B_MKI67	MRPS24
KRT10	1.55226e-18	-0.634653	0.307	0.601	5.10555e-14	gc_B_MKI67	KRT10
C16orf74	2.38362e-18	-0.462752	0.011	0.25	7.83996e-14	gc_B_MKI67	C16orf74
ANKRD28	2.63019e-18	-0.991461	0.133	0.397	8.65096e-14	gc_B_MKI67	ANKRD28
RAB2A	2.79918e-18	0.442529	0.58	0.368	9.20677e-14	gc_B_MKI67	RAB2A
CAPN2	3.38833e-18	-0.41781	0.004	0.236	1.11446e-13	gc_B_MKI67	CAPN2
CCPG1	3.95453e-18	-0.432755	0.045	0.301	1.30068e-13	gc_B_MKI67	CCPG1
TSPAN3	4.15992e-18	-0.599449	0.083	0.345	1.36824e-13	gc_B_MKI67	TSPAN3
TPD52	6.31623e-18	0.445114	0.765	0.56	2.07747e-13	gc_B_MKI67	TPD52
GAB1	6.63075e-18	-0.45757	0.008	0.238	2.18092e-13	gc_B_MKI67	GAB1
TXNDC11	7.50422e-18	-0.558079	0.091	0.361	2.46821e-13	gc_B_MKI67	TXNDC11
TNFRSF13B	1.02576e-17	-0.925107	0.034	0.272	3.37383e-13	gc_B_MKI67	TNFRSF13B
FCRL5	1.18085e-17	-0.531352	0.114	0.385	3.88395e-13	gc_B_MKI67	FCRL5
TGFB1	1.22315e-17	-0.885107	0.235	0.5	4.02305e-13	gc_B_MKI67	TGFB1
ERP29	1.59204e-17	0.405794	0.864	0.683	5.23638e-13	gc_B_MKI67	ERP29
SMCHD1	1.59247e-17	-1.02937	0.208	0.465	5.23778e-13	gc_B_MKI67	SMCHD1
PDK1	1.85902e-17	-0.426515	0.034	0.274	6.11449e-13	gc_B_MKI67	PDK1
GYPC	2.0768e-17	0.41388	0.723	0.524	6.83081e-13	gc_B_MKI67	GYPC
GNAS	2.27102e-17	-0.477593	0.674	0.784	7.46963e-13	gc_B_MKI67	GNAS
NPC2	2.46877e-17	-0.688863	0.273	0.528	8.12004e-13	gc_B_MKI67	NPC2
NDUFB4	2.65955e-17	0.410887	0.742	0.55	8.74753e-13	gc_B_MKI67	NDUFB4
SFPQ	4.33657e-17	0.442491	0.67	0.431	1.42634e-12	gc_B_MKI67	SFPQ
NSD3	5.01794e-17	-0.547475	0.083	0.35	1.65045e-12	gc_B_MKI67	NSD3
IGKV1-5	6.18643e-17	-6.57914	0.045	0.285	2.03478e-12	gc_B_MKI67	IGKV1-5
DAZAP1	7.57039e-17	0.492664	0.436	0.239	2.48998e-12	gc_B_MKI67	DAZAP1
SOCS3	7.7379e-17	-0.616363	0.004	0.219	2.54507e-12	gc_B_MKI67	SOCS3
RSRP1	7.90594e-17	-0.743457	0.08	0.332	2.60034e-12	gc_B_MKI67	RSRP1
PLP2	8.85333e-17	-0.707171	0.227	0.491	2.91195e-12	gc_B_MKI67	PLP2
LGALS1	1.37618e-16	-0.966168	0.299	0.543	4.5264e-12	gc_B_MKI67	LGALS1
CRELD2	2.04573e-16	-0.554666	0.159	0.419	6.7286e-12	gc_B_MKI67	CRELD2
TMEM256	2.23742e-16	0.424675	0.636	0.443	7.35911e-12	gc_B_MKI67	TMEM256
SELENOF	2.32056e-16	-0.414305	0.095	0.363	7.63256e-12	gc_B_MKI67	SELENOF
SELENOW	3.27158e-16	-0.449192	0.034	0.262	1.07605e-11	gc_B_MKI67	SELENOW
IGLV6-57	4.62595e-16	-4.9774	0.027	0.248	1.52152e-11	gc_B_MKI67	IGLV6-57
NDUFB6	6.96587e-16	0.456868	0.519	0.337	2.29114e-11	gc_B_MKI67	NDUFB6
IGKV3-11	7.54369e-16	-6.6592	0.008	0.214	2.4812e-11	gc_B_MKI67	IGKV3-11
RPL17	8.10838e-16	-0.919347	0.932	0.954	2.66693e-11	gc_B_MKI67	RPL17
MCL1	8.14665e-16	-0.961661	0.386	0.579	2.67951e-11	gc_B_MKI67	MCL1
CD69	8.16417e-16	-2.41723	0.428	0.539	2.68528e-11	gc_B_MKI67	CD69
PRMT1	9.18307e-16	0.535707	0.572	0.387	3.0204e-11	gc_B_MKI67	PRMT1
LMAN1	9.25676e-16	-0.654311	0.227	0.454	3.04464e-11	gc_B_MKI67	LMAN1
SNRPN	1.8916e-15	-0.518399	0.098	0.34	6.22165e-11	gc_B_MKI67	SNRPN
CSTB	2.79861e-15	0.414252	0.572	0.374	9.2049e-11	gc_B_MKI67	CSTB
CELF2	3.45674e-15	-0.792344	0.072	0.294	1.13696e-10	gc_B_MKI67	CELF2
ICAM3	3.95839e-15	-0.638864	0.326	0.567	1.30195e-10	gc_B_MKI67	ICAM3
AFF1	4.22077e-15	-0.477619	0.011	0.212	1.38825e-10	gc_B_MKI67	AFF1
HIST1H1C	5.38557e-15	0.450443	0.53	0.324	1.77137e-10	gc_B_MKI67	HIST1H1C
ATF3	5.62379e-15	-0.853992	0.023	0.228	1.84972e-10	gc_B_MKI67	ATF3
IRF4	6.01196e-15	-0.650689	0.034	0.243	1.97739e-10	gc_B_MKI67	IRF4
THEMIS2	6.29625e-15	-0.463307	0.045	0.264	2.0709e-10	gc_B_MKI67	THEMIS2
SEL1L	7.25638e-15	-0.467216	0.114	0.355	2.3867e-10	gc_B_MKI67	SEL1L
HEBP2	8.77797e-15	-0.423669	0.049	0.269	2.88716e-10	gc_B_MKI67	HEBP2
BSG	9.14166e-15	0.449412	0.64	0.465	3.00678e-10	gc_B_MKI67	BSG
CTSZ	9.40892e-15	-0.621176	0.189	0.441	3.09469e-10	gc_B_MKI67	CTSZ
ASAH1	9.79417e-15	-0.525081	0.121	0.36	3.2214e-10	gc_B_MKI67	ASAH1
EIF2AK3	9.98259e-15	-0.539243	0.114	0.356	3.28337e-10	gc_B_MKI67	EIF2AK3
CIAO2A	1.59191e-14	-0.437529	0.102	0.349	5.23594e-10	gc_B_MKI67	CIAO2A
AREG	1.66326e-14	-0.938565	0.015	0.209	5.47062e-10	gc_B_MKI67	AREG
CISD2	1.7635e-14	0.43606	0.492	0.327	5.80032e-10	gc_B_MKI67	CISD2
TMBIM4	1.8606e-14	-0.407216	0.083	0.315	6.11969e-10	gc_B_MKI67	TMBIM4
FKBP2	3.33914e-14	-1.02777	0.473	0.55	1.09828e-09	gc_B_MKI67	FKBP2
ADAM28	3.35124e-14	-1.09022	0.212	0.424	1.10226e-09	gc_B_MKI67	ADAM28
FOXO3	3.69024e-14	-0.428658	0.049	0.259	1.21376e-09	gc_B_MKI67	FOXO3
BANK1	3.98421e-14	-1.36912	0.235	0.404	1.31045e-09	gc_B_MKI67	BANK1
FAM173A	5.79563e-14	-0.434893	0.076	0.298	1.90624e-09	gc_B_MKI67	FAM173A
IGKV3-15	6.1968e-14	-6.13079	0.015	0.206	2.03819e-09	gc_B_MKI67	IGKV3-15
DPP7	7.55174e-14	-0.54768	0.295	0.52	2.48384e-09	gc_B_MKI67	DPP7
TXNDC15	8.7376e-14	-0.487072	0.182	0.409	2.87388e-09	gc_B_MKI67	TXNDC15
PHF1	9.63141e-14	-0.510836	0.053	0.256	3.16787e-09	gc_B_MKI67	PHF1
IGLV2-14	1.07473e-13	-6.50512	0.027	0.22	3.53488e-09	gc_B_MKI67	IGLV2-14
RNASE6	1.08021e-13	-0.661337	0.023	0.214	3.55291e-09	gc_B_MKI67	RNASE6
C4orf48	1.11697e-13	-0.432273	0.049	0.253	3.67381e-09	gc_B_MKI67	C4orf48
IGHM	1.23508e-13	-3.17958	0.049	0.247	4.0623e-09	gc_B_MKI67	IGHM
MAN1A1	1.84232e-13	-0.420949	0.038	0.235	6.05956e-09	gc_B_MKI67	MAN1A1
SNHG6	2.05167e-13	-0.632485	0.091	0.311	6.74816e-09	gc_B_MKI67	SNHG6
LMBRD1	2.08909e-13	-0.533941	0.163	0.402	6.87123e-09	gc_B_MKI67	LMBRD1
FOS	2.09346e-13	-1.30295	0.841	0.782	6.88558e-09	gc_B_MKI67	FOS
RARRES3	2.42743e-13	-0.58688	0.072	0.278	7.98407e-09	gc_B_MKI67	RARRES3
DNAJB1	2.96365e-13	-1.94039	0.314	0.478	9.74773e-09	gc_B_MKI67	DNAJB1
CCDC32	4.46703e-13	-0.408287	0.057	0.258	1.46925e-08	gc_B_MKI67	CCDC32
CCR7	5.45651e-13	-1.18535	0.027	0.203	1.7947e-08	gc_B_MKI67	CCR7
HLA-F	5.51929e-13	-0.696084	0.216	0.44	1.81535e-08	gc_B_MKI67	HLA-F
CYC1	6.18275e-13	0.417798	0.492	0.331	2.03357e-08	gc_B_MKI67	CYC1
BX571818.1	6.7615e-13	-0.491763	0.019	0.198	2.22392e-08	gc_B_MKI67	BX571818.1
MTCO1P12	7.40711e-13	-1.0966	0.03	0.22	2.43627e-08	gc_B_MKI67	MTCO1P12
PPIB	7.44142e-13	-0.764649	0.723	0.677	2.44756e-08	gc_B_MKI67	PPIB
SLC2A3	8.90827e-13	-1.27779	0.186	0.367	2.93002e-08	gc_B_MKI67	SLC2A3
HERPUD1	9.79198e-13	-0.901211	0.909	0.802	3.22068e-08	gc_B_MKI67	HERPUD1
IGHG1	1.01965e-12	-5.68393	0.08	0.267	3.35372e-08	gc_B_MKI67	IGHG1
CAMK1D	1.04673e-12	-0.618393	0.023	0.198	3.44281e-08	gc_B_MKI67	CAMK1D
H2AFX	1.10788e-12	0.453828	0.22	0.092	3.64392e-08	gc_B_MKI67	H2AFX
IGHV4-34	1.33136e-12	-6.00323	0.023	0.198	4.37898e-08	gc_B_MKI67	IGHV4-34
MBD2	1.5945e-12	0.525607	0.523	0.361	5.24447e-08	gc_B_MKI67	MBD2
RPN1	1.82261e-12	-0.583261	0.28	0.471	5.99474e-08	gc_B_MKI67	RPN1
TNFRSF13C	1.97288e-12	-0.942162	0.11	0.297	6.48901e-08	gc_B_MKI67	TNFRSF13C
MBNL2	1.98654e-12	-0.427658	0.068	0.266	6.53392e-08	gc_B_MKI67	MBNL2
STUB1	2.00887e-12	-0.439084	0.159	0.383	6.60737e-08	gc_B_MKI67	STUB1
ITGB7	2.22245e-12	-0.416968	0.061	0.251	7.30986e-08	gc_B_MKI67	ITGB7
FCGR2B	2.78031e-12	-0.498519	0.091	0.293	9.14471e-08	gc_B_MKI67	FCGR2B
SEC11C	2.94588e-12	-1.043	0.545	0.552	9.68929e-08	gc_B_MKI67	SEC11C
LMNA	3.06035e-12	-0.631202	0.045	0.229	1.00658e-07	gc_B_MKI67	LMNA
CCDC50	5.30409e-12	-0.641748	0.114	0.31	1.74457e-07	gc_B_MKI67	CCDC50
RRBP1	8.53423e-12	-0.491586	0.163	0.382	2.80699e-07	gc_B_MKI67	RRBP1
LINC01480	8.89596e-12	-0.650126	0.027	0.193	2.92597e-07	gc_B_MKI67	LINC01480
LINC00926	9.8286e-12	-1.08642	0.064	0.233	3.23272e-07	gc_B_MKI67	LINC00926
HPCAL1	1.17603e-11	-0.490687	0.049	0.226	3.86809e-07	gc_B_MKI67	HPCAL1
NCF1B	1.22016e-11	-0.554648	0.087	0.283	4.01324e-07	gc_B_MKI67	NCF1B
HLA-DRB5	1.42016e-11	-0.905581	0.133	0.329	4.67104e-07	gc_B_MKI67	HLA-DRB5
PNPLA2	1.65702e-11	-0.449301	0.121	0.327	5.45009e-07	gc_B_MKI67	PNPLA2
IGHG3	1.69843e-11	-2.36858	0.027	0.188	5.58632e-07	gc_B_MKI67	IGHG3
CFLAR	2.20435e-11	-0.638285	0.322	0.522	7.25034e-07	gc_B_MKI67	CFLAR
CCDC18-AS1	2.70688e-11	-0.445939	0.038	0.206	8.90319e-07	gc_B_MKI67	CCDC18-AS1
SLC38A2	2.98067e-11	-0.536524	0.14	0.338	9.80373e-07	gc_B_MKI67	SLC38A2
ANKRD44	3.50304e-11	-1.01756	0.246	0.424	1.15219e-06	gc_B_MKI67	ANKRD44
LY6E	3.88387e-11	-0.599081	0.163	0.362	1.27744e-06	gc_B_MKI67	LY6E
SSPN	3.91638e-11	-0.424205	0.008	0.157	1.28814e-06	gc_B_MKI67	SSPN
MAF1	7.88881e-11	-0.477667	0.091	0.274	2.59471e-06	gc_B_MKI67	MAF1
IGKV1-12	9.90969e-11	-4.26355	0.008	0.152	3.25939e-06	gc_B_MKI67	IGKV1-12
SLC7A5	1.07085e-10	-0.501097	0.053	0.219	3.52213e-06	gc_B_MKI67	SLC7A5
CLEC2B	1.29961e-10	-0.558093	0.049	0.215	4.27455e-06	gc_B_MKI67	CLEC2B
ANKRD37	1.33719e-10	-0.612535	0.068	0.236	4.39816e-06	gc_B_MKI67	ANKRD37
PRDX2	1.69463e-10	0.430248	0.545	0.414	5.57382e-06	gc_B_MKI67	PRDX2
HLA-E	1.83805e-10	-0.741667	0.879	0.929	6.04552e-06	gc_B_MKI67	HLA-E
SYTL1	1.9123e-10	-0.427936	0.144	0.345	6.28975e-06	gc_B_MKI67	SYTL1
CHD2	2.18673e-10	-0.668684	0.136	0.314	7.19239e-06	gc_B_MKI67	CHD2
CYSLTR1	2.402e-10	-0.410108	0.015	0.159	7.90043e-06	gc_B_MKI67	CYSLTR1
AC138123.1	2.70337e-10	-0.45469	0.015	0.159	8.89166e-06	gc_B_MKI67	AC138123.1
RCN2	2.84296e-10	-0.470486	0.072	0.242	9.35079e-06	gc_B_MKI67	RCN2
RGCC	3.09482e-10	-0.873999	0.114	0.295	1.01792e-05	gc_B_MKI67	RGCC
TNFRSF14	3.35467e-10	-0.486043	0.144	0.333	1.10338e-05	gc_B_MKI67	TNFRSF14
IGLV1-40	3.56735e-10	-5.68882	0.03	0.185	1.17334e-05	gc_B_MKI67	IGLV1-40
PTPN1	4.64302e-10	-0.64754	0.231	0.415	1.52714e-05	gc_B_MKI67	PTPN1
TMEM259	4.70917e-10	-0.434065	0.129	0.316	1.54889e-05	gc_B_MKI67	TMEM259
NUDT4	5.29187e-10	-0.507442	0.106	0.282	1.74055e-05	gc_B_MKI67	NUDT4
TRBC2	6.13007e-10	-0.714566	0.015	0.152	2.01624e-05	gc_B_MKI67	TRBC2
AC244205.1	6.69102e-10	-1.11705	0.004	0.134	2.20074e-05	gc_B_MKI67	AC244205.1
ZNF331	6.87299e-10	-1.32169	0.106	0.257	2.26059e-05	gc_B_MKI67	ZNF331
GLCCI1	8.45643e-10	-0.437335	0.186	0.376	2.7814e-05	gc_B_MKI67	GLCCI1
ARHGAP15	1.2231e-09	-0.756117	0.136	0.3	4.02289e-05	gc_B_MKI67	ARHGAP15
BASP1	1.4409e-09	0.422479	0.606	0.435	4.73926e-05	gc_B_MKI67	BASP1
MIR3188	1.62258e-09	-0.654532	0	0.122	5.33683e-05	gc_B_MKI67	MIR3188
IGHG2	1.6825e-09	-1.98093	0.004	0.129	5.53393e-05	gc_B_MKI67	IGHG2
MAML2	1.76562e-09	-0.526681	0.008	0.135	5.8073e-05	gc_B_MKI67	MAML2
IGLC2	1.86432e-09	-3.34136	0.057	0.203	6.13195e-05	gc_B_MKI67	IGLC2
DNAJB4	1.86845e-09	-0.489238	0.027	0.164	6.14553e-05	gc_B_MKI67	DNAJB4
GAS5	2.27156e-09	-0.578543	0.083	0.242	7.47138e-05	gc_B_MKI67	GAS5
IGHV3-23	2.32151e-09	-5.53309	0.008	0.134	7.63567e-05	gc_B_MKI67	IGHV3-23
LINC01781	2.68484e-09	-0.672576	0	0.12	8.83072e-05	gc_B_MKI67	LINC01781
ATP2B1-AS1	2.77073e-09	-0.42849	0.03	0.17	9.11319e-05	gc_B_MKI67	ATP2B1-AS1
RF00100.4	2.89707e-09	-0.56558	0.072	0.232	9.52876e-05	gc_B_MKI67	RF00100.4
IGLV2-23	3.3488e-09	-4.74155	0.011	0.138	0.000110145	gc_B_MKI67	IGLV2-23
IFI6	3.39572e-09	-0.486373	0.098	0.264	0.000111689	gc_B_MKI67	IFI6
TMEM59	4.70304e-09	-0.579336	0.652	0.636	0.000154688	gc_B_MKI67	TMEM59
CMTM7	4.7946e-09	-0.509931	0.098	0.257	0.000157699	gc_B_MKI67	CMTM7
HBP1	4.92784e-09	-0.413479	0.08	0.235	0.000162082	gc_B_MKI67	HBP1
IFNGR2	5.59653e-09	-0.452187	0.152	0.326	0.000184075	gc_B_MKI67	IFNGR2
KIAA1551	5.68744e-09	-0.728335	0.163	0.318	0.000187066	gc_B_MKI67	KIAA1551
IER5	6.28395e-09	-0.806835	0.061	0.203	0.000206685	gc_B_MKI67	IER5
SIK1	7.00922e-09	-0.429631	0.042	0.181	0.00023054	gc_B_MKI67	SIK1
HLA-A	7.05658e-09	-0.878503	0.894	0.923	0.000232098	gc_B_MKI67	HLA-A
IGLV1-44	7.36464e-09	-5.35283	0.034	0.17	0.00024223	gc_B_MKI67	IGLV1-44
TAGAP	8.60671e-09	-0.880937	0.413	0.548	0.000283083	gc_B_MKI67	TAGAP
TMX4	8.68668e-09	-0.515195	0.087	0.237	0.000285713	gc_B_MKI67	TMX4
FAM30A	9.27319e-09	-0.569889	0.034	0.166	0.000305004	gc_B_MKI67	FAM30A
IGLV1-51	9.35499e-09	-5.31422	0	0.112	0.000307695	gc_B_MKI67	IGLV1-51
CD27	1.0554e-08	0.418358	0.667	0.515	0.000347132	gc_B_MKI67	CD27
LY9	1.46895e-08	-0.886183	0.265	0.412	0.000483152	gc_B_MKI67	LY9
RALGPS2	1.50478e-08	-0.657545	0.265	0.435	0.000494937	gc_B_MKI67	RALGPS2
IGHV1-18	1.57761e-08	-5.71168	0.011	0.129	0.000518891	gc_B_MKI67	IGHV1-18
STK17A	2.08306e-08	-0.96415	0.299	0.429	0.00068514	gc_B_MKI67	STK17A
IGLV2-11	2.15216e-08	-5.35609	0.011	0.127	0.000707868	gc_B_MKI67	IGLV2-11
SAT1	2.44308e-08	-1.07968	0.689	0.744	0.000803552	gc_B_MKI67	SAT1
SESN1	2.63788e-08	-0.463467	0.042	0.171	0.000867626	gc_B_MKI67	SESN1
OGT	3.10454e-08	-0.41512	0.14	0.303	0.00102111	gc_B_MKI67	OGT
PELI1	3.42975e-08	-0.827606	0.239	0.382	0.00112808	gc_B_MKI67	PELI1
IGLV1-47	3.48808e-08	-5.37885	0.008	0.118	0.00114726	gc_B_MKI67	IGLV1-47
HIST1H2AI	3.60574e-08	0.743923	0.114	0.042	0.00118596	gc_B_MKI67	HIST1H2AI
IGHV7-4-1	3.91096e-08	-5.28436	0.004	0.111	0.00128635	gc_B_MKI67	IGHV7-4-1
NFKBIZ	6.09848e-08	-0.487834	0.129	0.281	0.00200585	gc_B_MKI67	NFKBIZ
IGHV3-30	6.52159e-08	-5.21918	0.015	0.127	0.00214501	gc_B_MKI67	IGHV3-30
NAPSB	6.65183e-08	-0.832201	0.072	0.2	0.00218785	gc_B_MKI67	NAPSB
MYADM	7.35591e-08	-0.50629	0.148	0.306	0.00241943	gc_B_MKI67	MYADM
PIK3IP1	8.21088e-08	-0.55772	0.038	0.156	0.00270064	gc_B_MKI67	PIK3IP1
ZBTB20	8.41265e-08	-0.669158	0.148	0.29	0.002767	gc_B_MKI67	ZBTB20
SMAP2	8.47132e-08	-0.759803	0.58	0.683	0.0027863	gc_B_MKI67	SMAP2
TUT4	8.47602e-08	-0.416922	0.061	0.192	0.00278785	gc_B_MKI67	TUT4
S100A4	9.50873e-08	-0.597549	0.11	0.249	0.00312752	gc_B_MKI67	S100A4
SRPK2	1.16366e-07	-0.457762	0.091	0.229	0.00382738	gc_B_MKI67	SRPK2
YBX3	1.39744e-07	-0.64699	0.038	0.155	0.00459631	gc_B_MKI67	YBX3
IGHV3-7	1.40291e-07	-5.371	0.011	0.115	0.00461431	gc_B_MKI67	IGHV3-7
TFF1	1.49408e-07	-0.548321	0.027	0.139	0.00491418	gc_B_MKI67	TFF1
IGKV1-39	1.69867e-07	-5.36846	0.015	0.121	0.00558709	gc_B_MKI67	IGKV1-39
IGHV4-39	1.80592e-07	-5.30544	0.023	0.132	0.00593986	gc_B_MKI67	IGHV4-39
FCHSD2	2.17489e-07	-0.559556	0.152	0.295	0.00715344	gc_B_MKI67	FCHSD2
IGKV1-9	2.23773e-07	-4.81361	0.008	0.106	0.00736011	gc_B_MKI67	IGKV1-9
LINC02397	2.29365e-07	-0.551246	0.015	0.118	0.00754404	gc_B_MKI67	LINC02397
COBLL1	2.31198e-07	-0.48132	0.163	0.31	0.00760434	gc_B_MKI67	COBLL1
SH3BP5	2.32538e-07	-0.487273	0.087	0.216	0.00764842	gc_B_MKI67	SH3BP5
IGLC3	2.38014e-07	-2.16827	0.049	0.171	0.00782851	gc_B_MKI67	IGLC3
TRAM1	2.46898e-07	-0.471972	0.398	0.523	0.00812071	gc_B_MKI67	TRAM1
SNX9	2.67245e-07	-0.678439	0.045	0.156	0.00878995	gc_B_MKI67	SNX9
SIDT1	2.96236e-07	-0.501512	0.027	0.132	0.0097435	gc_B_MKI67	SIDT1
MUC5AC	3.31735e-07	-0.510936	0.019	0.121	0.0109111	gc_B_MKI67	MUC5AC
HSPA6	3.32171e-07	-1.62773	0.008	0.103	0.0109254	gc_B_MKI67	HSPA6
PLAC8	3.42973e-07	-0.534409	0.034	0.144	0.0112807	gc_B_MKI67	PLAC8
GRASP	3.64533e-07	-0.460493	0.008	0.104	0.0119899	gc_B_MKI67	GRASP
OGA	3.93352e-07	-0.416295	0.102	0.239	0.0129377	gc_B_MKI67	OGA
PPP1R15A	4.20643e-07	-0.840416	0.769	0.779	0.0138354	gc_B_MKI67	PPP1R15A
P2RY10	4.70835e-07	-0.473608	0.053	0.167	0.0154862	gc_B_MKI67	P2RY10
IGKV1-17	5.07318e-07	-4.8344	0.015	0.114	0.0166862	gc_B_MKI67	IGKV1-17
PARP15	5.16905e-07	-0.521794	0.03	0.134	0.0170015	gc_B_MKI67	PARP15
RBFOX2	5.33092e-07	-0.541887	0.068	0.19	0.0175339	gc_B_MKI67	RBFOX2
ITGA4	6.07097e-07	-0.491129	0.121	0.253	0.019968	gc_B_MKI67	ITGA4
CEMIP2	6.27726e-07	-0.601129	0.011	0.105	0.0206465	gc_B_MKI67	CEMIP2
KDELR2	6.52148e-07	-0.422914	0.299	0.446	0.0214498	gc_B_MKI67	KDELR2
CAST	6.9765e-07	-0.506192	0.167	0.304	0.0229464	gc_B_MKI67	CAST
FAM49A	7.75701e-07	-0.418588	0.095	0.221	0.0255136	gc_B_MKI67	FAM49A
GLIPR1	8.27458e-07	-0.528156	0.205	0.346	0.0272159	gc_B_MKI67	GLIPR1
HOOK2	8.93696e-07	-0.408352	0.117	0.253	0.0293946	gc_B_MKI67	HOOK2
CAPG	1.04578e-06	-0.502937	0.11	0.229	0.0343966	gc_B_MKI67	CAPG
AC120193.1	1.71048e-06	-0.448474	0.015	0.105	0.0562595	gc_B_MKI67	AC120193.1
TNFSF9	1.76009e-06	-0.847754	0.045	0.148	0.0578913	gc_B_MKI67	TNFSF9
SAMSN1	1.78752e-06	-0.852119	0.22	0.332	0.0587934	gc_B_MKI67	SAMSN1
SOCS1	1.82553e-06	-0.457602	0.117	0.248	0.0600436	gc_B_MKI67	SOCS1
IGKV1D-39	1.83171e-06	-5.05521	0.011	0.1	0.0602467	gc_B_MKI67	IGKV1D-39
LINC01138	1.84566e-06	-0.421245	0.019	0.11	0.0607057	gc_B_MKI67	LINC01138
SIK3	1.92539e-06	-0.458203	0.064	0.175	0.0633281	gc_B_MKI67	SIK3
YPEL5	1.95865e-06	-0.858941	0.519	0.606	0.0644218	gc_B_MKI67	YPEL5
IGHG4	2.55954e-06	-1.37609	0.019	0.11	0.084186	gc_B_MKI67	IGHG4
AC025164.1	2.7635e-06	-0.546907	0.038	0.136	0.0908943	gc_B_MKI67	AC025164.1
TGIF1	2.78474e-06	-0.523922	0.023	0.113	0.091593	gc_B_MKI67	TGIF1
TTC3	3.62248e-06	-0.491422	0.223	0.358	0.119147	gc_B_MKI67	TTC3
CYTIP	3.81105e-06	-0.627039	0.648	0.719	0.125349	gc_B_MKI67	CYTIP
RAPGEF1	3.98469e-06	-0.573689	0.17	0.297	0.13106	gc_B_MKI67	RAPGEF1
PPP1R16B	4.87465e-06	-0.524615	0.068	0.17	0.160332	gc_B_MKI67	PPP1R16B
ARHGAP24	5.63214e-06	-0.800606	0.121	0.218	0.185247	gc_B_MKI67	ARHGAP24
ARID5B	5.95604e-06	-0.654886	0.405	0.52	0.1959	gc_B_MKI67	ARID5B
PDE4D	6.93935e-06	-0.562725	0.053	0.151	0.228242	gc_B_MKI67	PDE4D
SNHG7	1.05471e-05	-0.537408	0.269	0.39	0.346906	gc_B_MKI67	SNHG7
IGHV1-69D	1.12861e-05	-4.89758	0.023	0.108	0.371212	gc_B_MKI67	IGHV1-69D
FGD2	1.37115e-05	-0.447775	0.057	0.15	0.450985	gc_B_MKI67	FGD2
ALYREF	1.49526e-05	0.559864	0.299	0.212	0.491805	gc_B_MKI67	ALYREF
ARIH1	1.54282e-05	-0.473906	0.133	0.245	0.50745	gc_B_MKI67	ARIH1
UTRN	1.64206e-05	-0.442832	0.061	0.154	0.54009	gc_B_MKI67	UTRN
HERPUD2	1.7677e-05	-0.405923	0.098	0.204	0.581414	gc_B_MKI67	HERPUD2
ANXA6	2.07178e-05	-0.486354	0.33	0.465	0.681429	gc_B_MKI67	ANXA6
SSR3	2.39054e-05	-0.570778	0.564	0.533	0.786273	gc_B_MKI67	SSR3
CSRNP1	2.86799e-05	-0.440029	0.167	0.28	0.943309	gc_B_MKI67	CSRNP1
SP110	3.32446e-05	-0.691387	0.242	0.33	1	gc_B_MKI67	SP110
KDM6B	3.89236e-05	-0.525834	0.076	0.164	1	gc_B_MKI67	KDM6B
ARF6	4.22099e-05	-0.434814	0.314	0.446	1	gc_B_MKI67	ARF6
RNF213	4.47064e-05	-0.445224	0.159	0.266	1	gc_B_MKI67	RNF213
SKIL	4.84718e-05	-0.727487	0.208	0.295	1	gc_B_MKI67	SKIL
PRNP	5.27683e-05	-0.424652	0.098	0.192	1	gc_B_MKI67	PRNP
SPCS1	5.61591e-05	-0.448254	0.788	0.666	1	gc_B_MKI67	SPCS1
UBE2S	8.16007e-05	0.72486	0.337	0.257	1	gc_B_MKI67	UBE2S
ISCU	8.57534e-05	-0.443586	0.481	0.576	1	gc_B_MKI67	ISCU
CUTA	0.000103117	-0.414767	0.598	0.629	1	gc_B_MKI67	CUTA
TGFBR2	0.000111366	-0.459518	0.08	0.164	1	gc_B_MKI67	TGFBR2
ST6GAL1	0.000119366	-0.719601	0.371	0.471	1	gc_B_MKI67	ST6GAL1
TNFAIP3	0.000159973	-0.442766	0.148	0.248	1	gc_B_MKI67	TNFAIP3
RABAC1	0.000167666	-0.414211	0.617	0.604	1	gc_B_MKI67	RABAC1
CD24	0.000172658	-0.546622	0.045	0.116	1	gc_B_MKI67	CD24
MGAT5	0.000174387	-0.643157	0.087	0.164	1	gc_B_MKI67	MGAT5
CXCR4	0.000240452	-0.606185	0.913	0.585	1	gc_B_MKI67	CXCR4
SIPA1	0.000248147	-0.421564	0.072	0.148	1	gc_B_MKI67	SIPA1
MT-ND3	0.000281087	-0.878005	0.955	0.945	1	gc_B_MKI67	MT-ND3
MT2A	0.000383269	-0.895284	0.117	0.205	1	gc_B_MKI67	MT2A
SELL	0.00056674	-0.752535	0.136	0.203	1	gc_B_MKI67	SELL
LITAF	0.000626803	-0.40703	0.178	0.265	1	gc_B_MKI67	LITAF
HSPB1	0.000750223	-1.10322	0.295	0.365	1	gc_B_MKI67	HSPB1
NFE2L2	0.000789399	-0.41676	0.17	0.254	1	gc_B_MKI67	NFE2L2
SDF2L1	0.000815427	-0.439945	0.394	0.457	1	gc_B_MKI67	SDF2L1
CD70	0.000876539	-0.526605	0.053	0.116	1	gc_B_MKI67	CD70
SESN3	0.00100314	-0.476218	0.064	0.127	1	gc_B_MKI67	SESN3
FCER2	0.00137215	-0.666546	0.091	0.154	1	gc_B_MKI67	FCER2
2024-03-01	0.00153118	-0.707663	0.174	0.225	1	gc_B_MKI67	2024-03-01
VPS13C	0.00202022	-0.420513	0.167	0.239	1	gc_B_MKI67	VPS13C
CCNH	0.00252428	-0.601705	0.333	0.397	1	gc_B_MKI67	CCNH
EGR1	0.00257376	-0.547045	0.11	0.177	1	gc_B_MKI67	EGR1
AC119396.1	0.00323664	-0.477107	0.072	0.128	1	gc_B_MKI67	AC119396.1
RIPOR2	0.00367919	-0.495698	0.083	0.139	1	gc_B_MKI67	RIPOR2
RILPL2	0.00479753	-0.483237	0.102	0.155	1	gc_B_MKI67	RILPL2
MZB1	0.00485133	-1.44139	0.742	0.526	1	gc_B_MKI67	MZB1
AFF3	0.00538429	-0.43706	0.326	0.2	1	gc_B_MKI67	AFF3
TRIM22	0.0053914	-0.647492	0.167	0.209	1	gc_B_MKI67	TRIM22
CRIP1	0.00880962	-0.464248	0.678	0.526	1	gc_B_MKI67	CRIP1
ANKRD12	0.00998254	-0.473029	0.398	0.463	1	gc_B_MKI67	ANKRD12
RGS13.1	1.65711e-138	2.29302	0.678	0.062	5.45039e-134	gc_B	RGS13
LMO2.1	4.06905e-126	2.13375	0.487	0.033	1.33835e-121	gc_B	LMO2
ELL3.1	6.15578e-90	1.48248	0.348	0.023	2.0247e-85	gc_B	ELL3
SERPINA9.1	3.25706e-89	1.29134	0.383	0.029	1.07128e-84	gc_B	SERPINA9
HTR3A	3.08781e-67	0.625851	0.226	0.012	1.01561e-62	gc_B	HTR3A
SUGCT.1	1.44674e-62	1.43058	0.296	0.025	4.75847e-58	gc_B	SUGCT
HOPX.1	2.77819e-62	1.7584	0.47	0.066	9.13776e-58	gc_B	HOPX
CAMK1.1	5.3859e-61	0.895369	0.278	0.023	1.77148e-56	gc_B	CAMK1
ACTG1.1	5.88752e-59	2.48184	0.991	0.825	1.93647e-54	gc_B	ACTG1
RFTN1.1	2.87012e-56	1.83807	0.643	0.149	9.44011e-52	gc_B	RFTN1
ACTB.1	4.4009e-54	2.23172	0.991	0.961	1.4475e-49	gc_B	ACTB
PFN1.1	4.44792e-54	2.17387	1	0.876	1.46296e-49	gc_B	PFN1
BCL7A.1	1.51269e-53	1.20286	0.435	0.064	4.97538e-49	gc_B	BCL7A
TCL1A.1	5.49677e-52	1.61988	0.696	0.153	1.80794e-47	gc_B	TCL1A
GAPDH.1	3.46724e-50	2.08339	0.983	0.882	1.14041e-45	gc_B	GAPDH
ARPC1B.1	1.2583e-46	1.83416	0.922	0.486	4.13868e-42	gc_B	ARPC1B
MYO1E.1	1.61841e-45	1.62397	0.504	0.103	5.32311e-41	gc_B	MYO1E
ACY3.1	5.10648e-44	1.17618	0.374	0.058	1.67957e-39	gc_B	ACY3
CFL1.1	1.13828e-43	1.84389	0.965	0.798	3.7439e-39	gc_B	CFL1
ARPC2.1	4.08049e-43	1.78775	0.948	0.738	1.34211e-38	gc_B	ARPC2
LRMP.1	1.92334e-42	1.63753	0.652	0.196	6.32605e-38	gc_B	LRMP
SERF2.1	2.13946e-42	1.60258	0.983	0.948	7.03691e-38	gc_B	SERF2
LCK.1	1.09117e-41	1.13858	0.443	0.082	3.58897e-37	gc_B	LCK
CORO1A.1	4.62082e-41	1.76621	0.922	0.585	1.51983e-36	gc_B	CORO1A
MYBL1.1	6.0564e-41	0.81712	0.243	0.026	1.99201e-36	gc_B	MYBL1
RGS10.1	2.61013e-39	1.36621	0.617	0.18	8.58498e-35	gc_B	RGS10
ALOX5AP.1	8.61492e-39	1.33486	0.609	0.166	2.83353e-34	gc_B	ALOX5AP
AC023590.1.1	9.61084e-38	0.796951	0.313	0.045	3.1611e-33	gc_B	AC023590.1
MARCKSL1.1	2.99601e-37	2.74705	0.687	0.26	9.85417e-33	gc_B	MARCKSL1
SORL1.1	3.4208e-37	0.94266	0.322	0.049	1.12513e-32	gc_B	SORL1
PTTG1.1	1.82623e-36	1.3913	0.478	0.108	6.00666e-32	gc_B	PTTG1
HMGN1.1	2.2018e-36	1.80435	0.896	0.614	7.24195e-32	gc_B	HMGN1
NEIL1.1	4.18965e-36	1.47073	0.47	0.11	1.37802e-31	gc_B	NEIL1
LCP1.1	7.77398e-36	1.82893	0.748	0.3	2.55694e-31	gc_B	LCP1
RASL11A	7.95175e-36	1.15743	0.348	0.06	2.61541e-31	gc_B	RASL11A
IL4I1	9.06616e-36	0.627213	0.139	0.009	2.98195e-31	gc_B	IL4I1
AFF2	1.3156e-35	0.700094	0.209	0.022	4.32713e-31	gc_B	AFF2
OGG1.1	3.77661e-35	1.2307	0.4	0.08	1.24216e-30	gc_B	OGG1
MTMR14.1	2.38918e-34	1.27459	0.53	0.146	7.85825e-30	gc_B	MTMR14
VNN2.1	1.16641e-33	0.903448	0.357	0.066	3.83645e-29	gc_B	VNN2
DTX1.1	2.1911e-33	0.851794	0.287	0.045	7.20676e-29	gc_B	DTX1
PARP1.1	2.41564e-33	1.72438	0.791	0.444	7.94528e-29	gc_B	PARP1
ARPC3.1	7.46118e-33	1.42268	0.957	0.801	2.45406e-28	gc_B	ARPC3
SLC25A5.1	8.2592e-33	1.54924	0.87	0.62	2.71653e-28	gc_B	SLC25A5
EBI3	2.53224e-32	1.11388	0.226	0.029	8.3288e-28	gc_B	EBI3
ACTR3.1	3.21334e-32	1.53586	0.843	0.464	1.0569e-27	gc_B	ACTR3
ZNF608	1.01888e-31	1.01337	0.287	0.047	3.35121e-27	gc_B	ZNF608
LIMD2.1	1.59748e-31	1.63511	0.852	0.502	5.25426e-27	gc_B	LIMD2
STMN1.1	1.83148e-31	1.63583	0.487	0.122	6.02391e-27	gc_B	STMN1
PKM.1	2.36394e-31	1.5543	0.817	0.439	7.77523e-27	gc_B	PKM
LPP.1	2.9218e-31	1.3908	0.504	0.137	9.6101e-27	gc_B	LPP
RAPGEF5	2.94589e-31	0.742769	0.174	0.018	9.68934e-27	gc_B	RAPGEF5
ARPC5.1	1.10782e-30	1.45423	0.739	0.334	3.64373e-26	gc_B	ARPC5
ABRACL.1	1.37377e-30	1.66004	0.635	0.263	4.51847e-26	gc_B	ABRACL
GRHPR.1	2.96541e-30	1.17913	0.565	0.186	9.75354e-26	gc_B	GRHPR
PPIA.1	4.36751e-30	1.46688	0.948	0.839	1.43652e-25	gc_B	PPIA
H3F3A.1	7.34717e-30	1.35282	0.93	0.875	2.41656e-25	gc_B	H3F3A
CDCA7.1	6.63951e-29	0.882902	0.278	0.046	2.1838e-24	gc_B	CDCA7
BCAS4.1	1.41634e-28	1.25266	0.626	0.218	4.65848e-24	gc_B	BCAS4
BIK.1	5.98914e-28	1.46468	0.478	0.148	1.96989e-23	gc_B	BIK
ARHGDIB.1	6.10327e-28	1.36201	0.957	0.739	2.00743e-23	gc_B	ARHGDIB
KLF2.1	2.462e-27	-2.5473	0.148	0.693	8.09775e-23	gc_B	KLF2
MAML3	2.69691e-27	0.612304	0.148	0.015	8.87041e-23	gc_B	MAML3
TKT.1	3.81887e-27	1.47094	0.67	0.313	1.25607e-22	gc_B	TKT
RAN.1	8.87002e-27	1.4071	0.87	0.593	2.91744e-22	gc_B	RAN
CD40.1	1.50739e-26	1.478	0.67	0.3	4.95797e-22	gc_B	CD40
MYL6.1	1.52105e-26	1.34749	0.922	0.857	5.0029e-22	gc_B	MYL6
HMGB1.1	1.78716e-26	1.21462	0.939	0.788	5.87814e-22	gc_B	HMGB1
PDGFD	2.71007e-26	0.636006	0.183	0.023	8.91368e-22	gc_B	PDGFD
GCHFR.1	7.43213e-26	1.18504	0.417	0.114	2.4445e-21	gc_B	GCHFR
UCP2.1	9.1057e-26	1.53762	0.783	0.45	2.99496e-21	gc_B	UCP2
CSK.1	1.2048e-25	1.30232	0.643	0.269	3.96269e-21	gc_B	CSK
BCL6.1	1.7896e-25	0.944469	0.348	0.079	5.88619e-21	gc_B	BCL6
CD22.1	2.91107e-25	1.23886	0.557	0.189	9.57481e-21	gc_B	CD22
IGF2BP3	3.23717e-25	0.504774	0.157	0.018	1.06474e-20	gc_B	IGF2BP3
SIT1.1	3.51128e-25	1.1403	0.504	0.162	1.15489e-20	gc_B	SIT1
CYB561A3.1	3.81864e-25	0.985645	0.487	0.142	1.25599e-20	gc_B	CYB561A3
MS4A1.1	1.23696e-24	1.45793	0.826	0.486	4.06848e-20	gc_B	MS4A1
MCOLN2	5.58944e-24	0.69148	0.287	0.057	1.83842e-19	gc_B	MCOLN2
HMGN2.1	6.71613e-24	1.63205	0.861	0.555	2.209e-19	gc_B	HMGN2
SPRED2.1	7.561e-24	0.545797	0.174	0.023	2.48689e-19	gc_B	SPRED2
MYBL2.1	1.38239e-23	1.47213	0.33	0.079	4.5468e-19	gc_B	MYBL2
ANP32B.1	3.69705e-23	1.40456	0.783	0.521	1.216e-18	gc_B	ANP32B
MED12L	3.74939e-23	0.515804	0.165	0.021	1.23321e-18	gc_B	MED12L
ENO1.1	5.7297e-23	1.43087	0.739	0.42	1.88456e-18	gc_B	ENO1
ZFP36L2.1	7.33968e-23	-1.72571	0.374	0.813	2.41409e-18	gc_B	ZFP36L2
YWHAB.1	7.58437e-23	1.41424	0.8	0.576	2.49457e-18	gc_B	YWHAB
RPL28.1	9.26713e-23	0.840442	0.991	0.99	3.04805e-18	gc_B	RPL28
STAG3.1	1.19694e-22	1.02755	0.461	0.137	3.93686e-18	gc_B	STAG3
TUBB.1	1.3378e-22	1.69821	0.748	0.406	4.40015e-18	gc_B	TUBB
TOX	2.59154e-22	1.08567	0.383	0.108	8.52384e-18	gc_B	TOX
HNRNPA1.1	2.98183e-22	1.2005	0.913	0.804	9.80752e-18	gc_B	HNRNPA1
HMGA1.1	3.20722e-22	1.46355	0.6	0.265	1.05489e-17	gc_B	HMGA1
[truncated: 7,586 more rows]

## Sheet: Supplemental table S5
Supplementary Table S5, the top 30 DEGs of 11 myeloid cell subclusters
	p_val	avg_log2FC	pct.1	pct.2	p_val_adj	cluster	gene
TPSAB1	0	7.72419	0.998	0.011	0	Mast_CPA3	TPSAB1
TPSB2	0	6.35783	0.749	0.005	0	Mast_CPA3	TPSB2
CPA3	0	5.97427	0.961	0.003	0	Mast_CPA3	CPA3
TPSD1	0	5.00687	0.628	0.001	0	Mast_CPA3	TPSD1
GATA2	0	4.19208	0.889	0.002	0	Mast_CPA3	GATA2
KIT	0	4.02102	0.843	0.005	0	Mast_CPA3	KIT
CLU	0	4.00388	0.903	0.024	0	Mast_CPA3	CLU
CD69	0	3.77198	0.835	0.131	0	Mast_CPA3	CD69
LTC4S	0	3.40433	0.884	0.071	0	Mast_CPA3	LTC4S
HPGDS	0	3.35068	0.868	0.018	0	Mast_CPA3	HPGDS
VWA5A	0	3.24985	0.829	0.025	0	Mast_CPA3	VWA5A
HDC	0	3.02034	0.721	0.002	0	Mast_CPA3	HDC
SOCS1	0	2.91645	0.719	0.162	0	Mast_CPA3	SOCS1
SLC18A2	0	2.86141	0.752	0.002	0	Mast_CPA3	SLC18A2
MS4A2	0	2.75394	0.653	0.001	0	Mast_CPA3	MS4A2
SLC24A3	0	2.65646	0.576	0.011	0	Mast_CPA3	SLC24A3
CSF1	0	2.63844	0.497	0.03	0	Mast_CPA3	CSF1
IL1RL1	0	2.54718	0.695	0.003	0	Mast_CPA3	IL1RL1
HPGD	0	2.48527	0.589	0.039	0	Mast_CPA3	HPGD
LMNA	0	2.46091	0.861	0.388	0	Mast_CPA3	LMNA
CD9	0	2.45031	0.888	0.253	0	Mast_CPA3	CD9
RHEX	0	2.3078	0.539	0	0	Mast_CPA3	RHEX
BACE2	0	2.28121	0.633	0.014	0	Mast_CPA3	BACE2
ANXA1	0	2.21843	0.929	0.578	0	Mast_CPA3	ANXA1
NSMCE1	0	2.17611	0.62	0.156	0	Mast_CPA3	NSMCE1
MAOB	0	2.15813	0.6	0.001	0	Mast_CPA3	MAOB
LAPTM4A	0	2.15784	0.866	0.387	0	Mast_CPA3	LAPTM4A
SIGLEC17P	0	2.12217	0.529	0.004	0	Mast_CPA3	SIGLEC17P
PTGS1	0	2.07937	0.622	0.092	0	Mast_CPA3	PTGS1
TSC22D1	0	2.06974	0.59	0.148	0	Mast_CPA3	TSC22D1
RGS13	0	1.93458	0.509	0.007	0	Mast_CPA3	RGS13
GALC	0	1.87978	0.526	0.07	0	Mast_CPA3	GALC
FOSB	0	1.73832	0.897	0.557	0	Mast_CPA3	FOSB
MALAT1	0	1.73248	0.996	0.917	0	Mast_CPA3	MALAT1
LMO4	0	1.729	0.58	0.182	0	Mast_CPA3	LMO4
RAB27B	0	1.68333	0.432	0.003	0	Mast_CPA3	RAB27B
RAC2	0	1.68315	0.822	0.38	0	Mast_CPA3	RAC2
CCDC92	0	1.67146	0.47	0.068	0	Mast_CPA3	CCDC92
CNRIP1	0	1.64991	0.497	0.041	0	Mast_CPA3	CNRIP1
SLC26A2	0	1.63875	0.452	0.041	0	Mast_CPA3	SLC26A2
SYTL3	0	1.63315	0.593	0.156	0	Mast_CPA3	SYTL3
MLPH	0	1.62011	0.471	0.012	0	Mast_CPA3	MLPH
CAVIN2	0	1.61136	0.268	0.013	0	Mast_CPA3	CAVIN2
ATP6V0A2	0	1.60342	0.491	0.065	0	Mast_CPA3	ATP6V0A2
GRAP2	0	1.59446	0.441	0.007	0	Mast_CPA3	GRAP2
ALOX5	0	1.58585	0.686	0.29	0	Mast_CPA3	ALOX5
SIGLEC6	0	1.58284	0.427	0.001	0	Mast_CPA3	SIGLEC6
SMIM1	0	1.58034	0.405	0.013	0	Mast_CPA3	SMIM1
LDHB	0	1.57994	0.746	0.335	0	Mast_CPA3	LDHB
TNIK	0	1.57438	0.441	0.039	0	Mast_CPA3	TNIK
TSEN54	0	1.55126	0.471	0.049	0	Mast_CPA3	TSEN54
SMYD3	0	1.54392	0.444	0.042	0	Mast_CPA3	SMYD3
TIMP3	0	1.50255	0.384	0.015	0	Mast_CPA3	TIMP3
ITM2C	0	1.48529	0.553	0.097	0	Mast_CPA3	ITM2C
RPL5	0	1.44817	0.968	0.721	0	Mast_CPA3	RPL5
ITM2A	0	1.43996	0.435	0.019	0	Mast_CPA3	ITM2A
AL157895.1	0	1.43684	0.363	0	0	Mast_CPA3	AL157895.1
FER	0	1.43358	0.357	0.037	0	Mast_CPA3	FER
CADPS	0	1.42316	0.338	0.001	0	Mast_CPA3	CADPS
CNST	0	1.39981	0.437	0.071	0	Mast_CPA3	CNST
DUSP10	0	1.39499	0.437	0.08	0	Mast_CPA3	DUSP10
TESPA1	0	1.38981	0.423	0.013	0	Mast_CPA3	TESPA1
STXBP6	0	1.38252	0.378	0.006	0	Mast_CPA3	STXBP6
CTTNBP2	0	1.3756	0.354	0.032	0	Mast_CPA3	CTTNBP2
MAST4	0	1.37232	0.382	0.017	0	Mast_CPA3	MAST4
FXYD5	0	1.36252	0.905	0.62	0	Mast_CPA3	FXYD5
RHOBTB3	0	1.3609	0.448	0.072	0	Mast_CPA3	RHOBTB3
ARHGEF6	0	1.3539	0.431	0.074	0	Mast_CPA3	ARHGEF6
CD82	0	1.35054	0.604	0.182	0	Mast_CPA3	CD82
VIM	0	1.34485	0.993	0.855	0	Mast_CPA3	VIM
ALOX5AP	0	1.34307	0.919	0.437	0	Mast_CPA3	ALOX5AP
RHOH	0	1.33274	0.726	0.229	0	Mast_CPA3	RHOH
SKAP1	0	1.30581	0.391	0.015	0	Mast_CPA3	SKAP1
KIAA1522	0	1.27317	0.354	0.011	0	Mast_CPA3	KIAA1522
CLNK	0	1.26263	0.253	0.01	0	Mast_CPA3	CLNK
KIAA1549	0	1.23431	0.312	0.002	0	Mast_CPA3	KIAA1549
RPS4X	0	1.21166	0.984	0.812	0	Mast_CPA3	RPS4X
CTSW	0	1.21064	0.331	0.016	0	Mast_CPA3	CTSW
DLC1	0	1.20059	0.33	0.007	0	Mast_CPA3	DLC1
ZNRF1	0	1.19714	0.366	0.04	0	Mast_CPA3	ZNRF1
SLC45A3	0	1.19196	0.333	0.006	0	Mast_CPA3	SLC45A3
EEF1A1	0	1.16673	0.98	0.866	0	Mast_CPA3	EEF1A1
CALB2	0	1.15846	0.292	0	0	Mast_CPA3	CALB2
RPL34	0	1.14549	0.987	0.855	0	Mast_CPA3	RPL34
ADRB2	0	1.12771	0.301	0.024	0	Mast_CPA3	ADRB2
NTRK1	0	1.11724	0.323	0	0	Mast_CPA3	NTRK1
RPL14	0	1.11513	0.975	0.789	0	Mast_CPA3	RPL14
RPS27A	0	1.1132	0.989	0.86	0	Mast_CPA3	RPS27A
RPL11	0	1.07499	0.992	0.858	0	Mast_CPA3	RPL11
GCSAML	0	1.07383	0.299	0	0	Mast_CPA3	GCSAML
LIF	0	1.05831	0.268	0.005	0	Mast_CPA3	LIF
PBX1	0	1.05817	0.276	0.002	0	Mast_CPA3	PBX1
P2RX1	0	1.05264	0.361	0.035	0	Mast_CPA3	P2RX1
NDFIP2	0	1.03655	0.306	0.006	0	Mast_CPA3	NDFIP2
GMPR	0	1.03403	0.326	0.027	0	Mast_CPA3	GMPR
CDK15	0	1.02414	0.265	0	0	Mast_CPA3	CDK15
PTMA	0	0.97684	0.994	0.861	0	Mast_CPA3	PTMA
KLRG1	0	0.970416	0.295	0.007	0	Mast_CPA3	KLRG1
KCNH2	0	0.959935	0.267	0	0	Mast_CPA3	KCNH2
RPS3	0	0.941305	0.985	0.835	0	Mast_CPA3	RPS3
TMEM233	0	0.911612	0.22	0	0	Mast_CPA3	TMEM233
RPL10	0	0.907465	0.996	0.875	0	Mast_CPA3	RPL10
SVOPL	0	0.896747	0.247	0	0	Mast_CPA3	SVOPL
RPL32	0	0.881935	0.99	0.863	0	Mast_CPA3	RPL32
CYBA	0	-1.40735	0.774	0.889	0	Mast_CPA3	CYBA
ACTB	0	-1.41063	0.98	0.99	0	Mast_CPA3	ACTB
PFN1	0	-1.5666	0.854	0.926	0	Mast_CPA3	PFN1
TMSB10	0	-1.87338	0.96	0.909	0	Mast_CPA3	TMSB10
TYROBP	0	-1.89391	0.875	0.963	0	Mast_CPA3	TYROBP
S100A11	0	-1.90947	0.801	0.95	0	Mast_CPA3	S100A11
BRI3	0	-2.09678	0.303	0.766	0	Mast_CPA3	BRI3
TYMP	0	-2.19397	0.225	0.701	0	Mast_CPA3	TYMP
MS4A7	0	-2.23251	0.007	0.533	0	Mast_CPA3	MS4A7
CTSS	0	-2.23778	0.209	0.698	0	Mast_CPA3	CTSS
SERPINA1	0	-2.2714	0.033	0.603	0	Mast_CPA3	SERPINA1
RAB31	0	-2.3289	0.012	0.627	0	Mast_CPA3	RAB31
SAT1	0	-2.35906	0.833	0.979	0	Mast_CPA3	SAT1
LSP1	0	-2.42009	0.039	0.565	0	Mast_CPA3	LSP1
LST1	0	-2.48896	0.07	0.658	0	Mast_CPA3	LST1
ANXA2	0	-2.64342	0.1	0.68	0	Mast_CPA3	ANXA2
FTL	0	-2.83318	0.991	0.994	0	Mast_CPA3	FTL
NAMPT	0	-3.12653	0.25	0.747	0	Mast_CPA3	NAMPT
HLA-DQB1	0	-3.18888	0.087	0.642	0	Mast_CPA3	HLA-DQB1
HLA-DQA1	0	-3.36025	0.056	0.613	0	Mast_CPA3	HLA-DQA1
LYZ	0	-3.40283	0.162	0.68	0	Mast_CPA3	LYZ
AIF1	0	-3.56195	0.069	0.811	0	Mast_CPA3	AIF1
HLA-DPA1	0	-3.62798	0.235	0.737	0	Mast_CPA3	HLA-DPA1
HLA-DPB1	0	-3.64435	0.172	0.723	0	Mast_CPA3	HLA-DPB1
CEBPD	0	-3.74632	0.04	0.737	0	Mast_CPA3	CEBPD
SOD2	0	-3.9778	0.168	0.785	0	Mast_CPA3	SOD2
HLA-DRB1	0	-4.12646	0.286	0.783	0	Mast_CPA3	HLA-DRB1
CD74	0	-4.22515	0.586	0.875	0	Mast_CPA3	CD74
HLA-DRA	0	-4.86106	0.144	0.818	0	Mast_CPA3	HLA-DRA
S100A8	0	-5.2058	0.017	0.553	0	Mast_CPA3	S100A8
S100A9	0	-5.23559	0.018	0.68	0	Mast_CPA3	S100A9
NSMCE1-DT	1.60846e-307	1.03697	0.27	0.015	5.29038e-303	Mast_CPA3	NSMCE1-DT
TUBA1A	2.253e-307	2.51968	0.722	0.358	7.41036e-303	Mast_CPA3	TUBA1A
ITGB2	1.53361e-306	-2.14831	0.123	0.621	5.04419e-302	Mast_CPA3	ITGB2
CD14	1.74691e-306	-2.58857	0.004	0.525	5.74578e-302	Mast_CPA3	CD14
SPI1	3.22253e-306	-1.87552	0.33	0.738	1.05992e-301	Mast_CPA3	SPI1
MS4A6A	1.62035e-305	-2.57969	0.009	0.531	5.32951e-301	Mast_CPA3	MS4A6A
CTSZ	2.30831e-304	-2.5407	0.168	0.648	7.59225e-300	Mast_CPA3	CTSZ
C12orf57	3.76348e-303	1.42803	0.632	0.229	1.23785e-298	Mast_CPA3	C12orf57
C5AR1	2.70955e-301	-2.44811	0.005	0.522	8.91197e-297	Mast_CPA3	C5AR1
AKAP12	6.82081e-300	1.0098	0.274	0.017	2.24343e-295	Mast_CPA3	AKAP12
RPL30	1.47161e-297	0.852409	0.988	0.892	4.84029e-293	Mast_CPA3	RPL30
MCTP2	4.30568e-297	0.895174	0.332	0.033	1.41618e-292	Mast_CPA3	MCTP2
AKAP13	2.28237e-295	1.63761	0.787	0.471	7.50696e-291	Mast_CPA3	AKAP13
G0S2	7.75373e-295	-5.16914	0.037	0.541	2.55028e-290	Mast_CPA3	G0S2
CD37	1.64052e-294	1.23733	0.818	0.453	5.39582e-290	Mast_CPA3	CD37
HLA-DMA	1.84437e-294	-2.22736	0.081	0.579	6.06633e-290	Mast_CPA3	HLA-DMA
IFI30	1.07701e-293	-2.11573	0.054	0.56	3.54241e-289	Mast_CPA3	IFI30
TMEM44	1.95157e-291	0.965995	0.255	0.014	6.4189e-287	Mast_CPA3	TMEM44
IKZF3	3.00509e-291	0.913068	0.236	0.009	9.88405e-287	Mast_CPA3	IKZF3
RPS6KA5	2.34199e-288	1.0845	0.342	0.045	7.70303e-284	Mast_CPA3	RPS6KA5
SYTL2	4.05247e-288	0.799356	0.232	0.008	1.3329e-283	Mast_CPA3	SYTL2
LAX1	4.52595e-288	0.807121	0.211	0.003	1.48863e-283	Mast_CPA3	LAX1
PNMT	5.45177e-288	0.876966	0.198	0.001	1.79314e-283	Mast_CPA3	PNMT
CTSG	4.49568e-287	1.84681	0.197	0.001	1.47867e-282	Mast_CPA3	CTSG
SERF2	6.78197e-287	-1.11373	0.915	0.904	2.23066e-282	Mast_CPA3	SERF2
RPL24	1.26829e-286	1.022	0.96	0.784	4.17153e-282	Mast_CPA3	RPL24
LINC01835	3.48889e-286	0.864062	0.194	0	1.14753e-281	Mast_CPA3	LINC01835
LAT	6.23392e-285	1.00084	0.284	0.024	2.0504e-280	Mast_CPA3	LAT
RGS1	7.33715e-285	1.82952	0.81	0.397	2.41326e-280	Mast_CPA3	RGS1
IGSF6	5.45316e-284	-2.06517	0.003	0.498	1.7936e-279	Mast_CPA3	IGSF6
IL18R1	1.31664e-283	1.1627	0.353	0.046	4.33055e-279	Mast_CPA3	IL18R1
ADAM12	3.29334e-283	0.97657	0.237	0.011	1.08321e-278	Mast_CPA3	ADAM12
NFKBIZ	1.80933e-281	1.48894	0.812	0.465	5.95107e-277	Mast_CPA3	NFKBIZ
CTNNBL1	9.74467e-281	1.29547	0.523	0.159	3.20512e-276	Mast_CPA3	CTNNBL1
CHN2	9.80881e-280	1.03992	0.302	0.032	3.22622e-275	Mast_CPA3	CHN2
ST8SIA6	3.9089e-279	0.785656	0.195	0.001	1.28568e-274	Mast_CPA3	ST8SIA6
FCGRT	2.96049e-277	-2.04022	0.134	0.605	9.73735e-273	Mast_CPA3	FCGRT
CTSB	1.48332e-276	-2.80153	0.435	0.74	4.87877e-272	Mast_CPA3	CTSB
RPL6	9.47197e-274	0.903919	0.977	0.793	3.11543e-269	Mast_CPA3	RPL6
RAB37	1.59885e-272	0.755733	0.227	0.009	5.25877e-268	Mast_CPA3	RAB37
MEIS2	6.99989e-272	0.814407	0.195	0.002	2.30233e-267	Mast_CPA3	MEIS2
HCK	7.39899e-272	-1.74221	0.006	0.488	2.4336e-267	Mast_CPA3	HCK
ALS2	1.90451e-271	0.984804	0.256	0.018	6.26414e-267	Mast_CPA3	ALS2
COL18A1	5.7414e-271	0.875566	0.285	0.027	1.8884e-266	Mast_CPA3	COL18A1
MYADM	1.88782e-269	1.5033	0.699	0.337	6.20923e-265	Mast_CPA3	MYADM
IER3	2.4962e-268	-2.57168	0.212	0.652	8.21027e-264	Mast_CPA3	IER3
MARCKS	3.02441e-268	-2.06291	0.041	0.524	9.94757e-264	Mast_CPA3	MARCKS
TGFBI	3.54125e-267	-2.01899	0.006	0.481	1.16475e-262	Mast_CPA3	TGFBI
NACA	6.28271e-267	0.895067	0.964	0.789	2.06644e-262	Mast_CPA3	NACA
JUN	7.67662e-266	2.0706	0.82	0.5	2.52492e-261	Mast_CPA3	JUN
ADCYAP1	5.87983e-263	1.42515	0.18	0	1.93394e-258	Mast_CPA3	ADCYAP1
ANKRD28	1.67384e-262	1.46688	0.473	0.127	5.50543e-258	Mast_CPA3	ANKRD28
ZBTB20	3.48629e-262	1.29343	0.393	0.077	1.14667e-257	Mast_CPA3	ZBTB20
IDS	5.3751e-262	1.3721	0.634	0.274	1.76792e-257	Mast_CPA3	IDS
HSP90AB1	7.19263e-262	1.21426	0.912	0.648	2.36573e-257	Mast_CPA3	HSP90AB1
ACSL4	2.08523e-261	1.29277	0.591	0.216	6.85852e-257	Mast_CPA3	ACSL4
FPR1	2.81767e-261	-2.38982	0.005	0.473	9.26758e-257	Mast_CPA3	FPR1
ENPP3	1.58936e-260	0.731093	0.178	0	5.22755e-256	Mast_CPA3	ENPP3
BHLHE40	1.16918e-259	1.62184	0.682	0.336	3.84554e-255	Mast_CPA3	BHLHE40
FERMT2	1.85836e-259	0.732197	0.213	0.008	6.11232e-255	Mast_CPA3	FERMT2
GRINA	5.0857e-258	-1.70066	0.191	0.639	1.67274e-253	Mast_CPA3	GRINA
RPL7A	2.11599e-256	0.853489	0.974	0.83	6.9597e-252	Mast_CPA3	RPL7A
CD22	2.69528e-256	0.83273	0.238	0.016	8.86505e-252	Mast_CPA3	CD22
ABCC4	8.63289e-256	1.03845	0.314	0.044	2.83944e-251	Mast_CPA3	ABCC4
ARMH1	1.93457e-255	0.976088	0.281	0.03	6.36299e-251	Mast_CPA3	ARMH1
UBB	1.78291e-254	1.06581	0.919	0.699	5.86416e-250	Mast_CPA3	UBB
BTK	2.93478e-254	1.17411	0.455	0.124	9.65279e-250	Mast_CPA3	BTK
NR4A1	5.95922e-254	1.68324	0.759	0.423	1.96005e-249	Mast_CPA3	NR4A1
CIRBP	3.78981e-253	1.21895	0.772	0.46	1.24651e-248	Mast_CPA3	CIRBP
TNFRSF1B	1.07326e-252	-1.91861	0.026	0.487	3.53007e-248	Mast_CPA3	TNFRSF1B
GATA1	5.87192e-252	0.662356	0.172	0	1.93133e-247	Mast_CPA3	GATA1
CXCL8	2.08815e-251	-4.17489	0.015	0.472	6.86813e-247	Mast_CPA3	CXCL8
ATP5F1E	1.26081e-249	-1.48766	0.617	0.801	4.14694e-245	Mast_CPA3	ATP5F1E
LEO1	2.69782e-249	1.156	0.329	0.054	8.87339e-245	Mast_CPA3	LEO1
DIP2C	3.18677e-248	0.759139	0.203	0.008	1.04816e-243	Mast_CPA3	DIP2C
PRKX	5.03802e-246	1.29383	0.36	0.07	1.65706e-241	Mast_CPA3	PRKX
RPL36AL	1.55891e-241	1.0026	0.91	0.704	5.12743e-237	Mast_CPA3	RPL36AL
FCGR2A	1.57411e-240	-1.95509	0.088	0.544	5.17739e-236	Mast_CPA3	FCGR2A
SLC11A1	1.82962e-239	-2.34053	0.026	0.466	6.01779e-235	Mast_CPA3	SLC11A1
TIMP2	2.92983e-239	-1.69866	0.012	0.454	9.6365e-235	Mast_CPA3	TIMP2
ACSL1	4.41309e-239	-2.73599	0.037	0.483	1.45151e-234	Mast_CPA3	ACSL1
AC020914.1	1.19236e-238	0.64568	0.164	0	3.9218e-234	Mast_CPA3	AC020914.1
C15orf48	5.39049e-238	-3.24581	0.027	0.465	1.77299e-233	Mast_CPA3	C15orf48
S100A10	3.98853e-235	-2.4638	0.57	0.766	1.31187e-230	Mast_CPA3	S100A10
JUND	2.14474e-233	1.44291	0.905	0.742	7.05426e-229	Mast_CPA3	JUND
CYBB	2.47419e-233	-1.56292	0.001	0.43	8.13785e-229	Mast_CPA3	CYBB
CTSH	4.08858e-233	-1.57247	0.077	0.523	1.34477e-228	Mast_CPA3	CTSH
BATF	9.66851e-232	1.29289	0.445	0.124	3.18007e-227	Mast_CPA3	BATF
GATA2-AS1	1.62813e-231	1.09025	0.157	0	5.3551e-227	Mast_CPA3	GATA2-AS1
DDIT4	3.53151e-231	1.41047	0.767	0.445	1.16155e-226	Mast_CPA3	DDIT4
NMT2	3.88726e-230	0.767118	0.206	0.012	1.27856e-225	Mast_CPA3	NMT2
COBLL1	2.6319e-229	0.741424	0.202	0.01	8.65658e-225	Mast_CPA3	COBLL1
STAP1	5.21557e-229	0.664337	0.191	0.008	1.71545e-224	Mast_CPA3	STAP1
EMID1	8.77917e-228	0.614643	0.166	0.002	2.88756e-223	Mast_CPA3	EMID1
DHRS9	6.45495e-226	0.866054	0.26	0.03	2.1231e-221	Mast_CPA3	DHRS9
UPP1	9.42969e-225	-1.76868	0.067	0.501	3.10152e-220	Mast_CPA3	UPP1
RNF144B	1.05059e-224	-1.8734	0.009	0.429	3.45549e-220	Mast_CPA3	RNF144B
ACOT7	5.03119e-224	1.20477	0.344	0.07	1.65481e-219	Mast_CPA3	ACOT7
OAZ1	3.09984e-223	-0.893657	0.882	0.909	1.01957e-218	Mast_CPA3	OAZ1
FOXP1	1.55387e-222	1.23361	0.517	0.188	5.11083e-218	Mast_CPA3	FOXP1
IL1B	1.88113e-222	-4.06124	0.018	0.435	6.18724e-218	Mast_CPA3	IL1B
RNF144A	6.03712e-222	0.688698	0.197	0.011	1.98567e-217	Mast_CPA3	RNF144A
CFL1	1.43518e-221	-1.03382	0.789	0.871	4.72045e-217	Mast_CPA3	CFL1
RAB44	1.52937e-221	0.612563	0.158	0.001	5.03026e-217	Mast_CPA3	RAB44
SAMHD1	4.1058e-221	-1.53095	0.047	0.473	1.35044e-216	Mast_CPA3	SAMHD1
LGALS1	5.24001e-221	-1.77552	0.594	0.788	1.72349e-216	Mast_CPA3	LGALS1
COTL1	6.76347e-221	-1.67742	0.427	0.727	2.22457e-216	Mast_CPA3	COTL1
BTG2	1.39242e-220	1.36612	0.705	0.376	4.57982e-216	Mast_CPA3	BTG2
TREM1	2.0163e-219	-2.3196	0.004	0.415	6.63181e-215	Mast_CPA3	TREM1
EPB41L1	3.81882e-218	0.750335	0.216	0.017	1.25605e-213	Mast_CPA3	EPB41L1
CEBPB	3.12798e-217	-1.76526	0.379	0.723	1.02882e-212	Mast_CPA3	CEBPB
C1QA	5.27173e-217	-4.01576	0.016	0.424	1.73392e-212	Mast_CPA3	C1QA
ZNF704	7.69543e-216	0.656743	0.167	0.004	2.53111e-211	Mast_CPA3	ZNF704
SOCS3	1.29989e-214	-1.97934	0.052	0.471	4.27548e-210	Mast_CPA3	SOCS3
GALNT6	2.81301e-214	1.16355	0.35	0.077	9.25227e-210	Mast_CPA3	GALNT6
IL9R	5.53062e-214	0.60277	0.15	0.001	1.81908e-209	Mast_CPA3	IL9R
CTSL	9.02644e-214	-2.50353	0.041	0.449	2.96889e-209	Mast_CPA3	CTSL
FTH1	1.77374e-213	-1.4949	0.995	0.998	5.83402e-209	Mast_CPA3	FTH1
RP11-354E11.2	2.53514e-213	0.871336	0.145	0	8.33834e-209	Mast_CPA3	RP11-354E11.2
ANXA5	5.87294e-213	-1.57305	0.391	0.707	1.93167e-208	Mast_CPA3	ANXA5
STMN1	6.27698e-213	1.11056	0.5	0.165	2.06456e-208	Mast_CPA3	STMN1
PIK3R6	1.77062e-212	0.850311	0.259	0.034	5.82374e-208	Mast_CPA3	PIK3R6
GPR65	3.74506e-211	1.2749	0.447	0.139	1.23179e-206	Mast_CPA3	GPR65
ABCC1	4.17734e-211	1.20253	0.39	0.104	1.37397e-206	Mast_CPA3	ABCC1
SMIM25	2.62791e-209	-2.09024	0.005	0.404	8.64346e-205	Mast_CPA3	SMIM25
MAFB	2.80644e-209	-1.82057	0.007	0.406	9.23067e-205	Mast_CPA3	MAFB
CD163	4.01317e-209	-1.7508	0	0.395	1.31997e-204	Mast_CPA3	CD163
AREG	1.02194e-208	1.62106	0.71	0.344	3.36128e-204	Mast_CPA3	AREG
ACTG1	7.04896e-208	-1.18948	0.743	0.877	2.31847e-203	Mast_CPA3	ACTG1
EDARADD	1.05307e-207	0.730068	0.175	0.007	3.46367e-203	Mast_CPA3	EDARADD
TSPYL2	2.67197e-206	1.54492	0.419	0.119	8.78838e-202	Mast_CPA3	TSPYL2
PLAT	2.17612e-204	0.79947	0.165	0.006	7.15748e-200	Mast_CPA3	PLAT
PLPP1	4.51609e-204	1.19517	0.251	0.033	1.48539e-199	Mast_CPA3	PLPP1
CLEC7A	1.19929e-203	-1.49684	0.002	0.392	3.94458e-199	Mast_CPA3	CLEC7A
HLA-DRB5	5.82332e-203	-2.51141	0.16	0.543	1.91535e-198	Mast_CPA3	HLA-DRB5
EPAS1	6.60975e-203	1.13374	0.299	0.055	2.17401e-198	Mast_CPA3	EPAS1
PKIG	1.06245e-202	0.760297	0.226	0.024	3.49451e-198	Mast_CPA3	PKIG
TNFSF10	1.08041e-202	1.02053	0.413	0.114	3.55357e-198	Mast_CPA3	TNFSF10
AC111188.1	1.96026e-202	0.610985	0.141	0.001	6.4475e-198	Mast_CPA3	AC111188.1
AHNAK	3.09028e-202	1.43654	0.739	0.452	1.01643e-197	Mast_CPA3	AHNAK
PILRA	3.67878e-202	-1.57402	0.008	0.398	1.20999e-197	Mast_CPA3	PILRA
AC092979.1	4.17079e-202	0.896125	0.138	0	1.37181e-197	Mast_CPA3	AC092979.1
C1QB	5.70045e-202	-4.05494	0.018	0.405	1.87494e-197	Mast_CPA3	C1QB
ARHGDIB	1.80607e-201	0.856853	0.892	0.67	5.94036e-197	Mast_CPA3	ARHGDIB
GNPTAB	7.25667e-201	1.12121	0.442	0.147	2.38679e-196	Mast_CPA3	GNPTAB
NCF2	1.56079e-200	-1.57002	0.003	0.387	5.13359e-196	Mast_CPA3	NCF2
AKAP2	4.10587e-200	0.778259	0.224	0.024	1.35046e-195	Mast_CPA3	AKAP2
DUSP6	6.98689e-199	1.31686	0.456	0.149	2.29806e-194	Mast_CPA3	DUSP6
CD38	3.33436e-198	1.27841	0.364	0.094	1.0967e-193	Mast_CPA3	CD38
HLTF	2.80241e-197	0.791493	0.226	0.026	9.21739e-193	Mast_CPA3	HLTF
AP2S1	3.75262e-197	-1.3884	0.288	0.642	1.23428e-192	Mast_CPA3	AP2S1
PTPRE	5.08286e-197	-1.50886	0.043	0.44	1.67181e-192	Mast_CPA3	PTPRE
AFF2	8.69323e-197	0.539828	0.153	0.004	2.85929e-192	Mast_CPA3	AFF2
C1QC	9.16515e-197	-3.86605	0.019	0.399	3.01451e-192	Mast_CPA3	C1QC
FAU	1.38207e-196	0.606394	0.989	0.923	4.54576e-192	Mast_CPA3	FAU
PLEK	3.94548e-196	-2.33916	0.146	0.54	1.29771e-191	Mast_CPA3	PLEK
TAL1	2.38086e-195	0.514665	0.135	0	7.83089e-191	Mast_CPA3	TAL1
PDE4B	1.14753e-193	-2.36651	0.04	0.431	3.77435e-189	Mast_CPA3	PDE4B
2024-09-02	1.24072e-192	1.18068	0.58	0.287	4.08085e-188	Mast_CPA3	2024-09-02
HLA-DMB	1.29425e-192	-1.42688	0.007	0.382	4.2569e-188	Mast_CPA3	HLA-DMB
CST3	1.32895e-192	-1.96259	0.833	0.819	4.37104e-188	Mast_CPA3	CST3
MYL6	2.83963e-192	-0.902056	0.925	0.937	9.33984e-188	Mast_CPA3	MYL6
PEBP1	2.17138e-191	1.11492	0.632	0.322	7.14188e-187	Mast_CPA3	PEBP1
MSI2	8.81589e-191	0.825144	0.269	0.045	2.89964e-186	Mast_CPA3	MSI2
CCL3	2.01573e-190	-3.60136	0.026	0.402	6.62993e-186	Mast_CPA3	CCL3
TNFSF13B	2.12298e-190	-1.3662	0.007	0.379	6.98271e-186	Mast_CPA3	TNFSF13B
C21orf91	2.2285e-189	0.800705	0.251	0.037	7.32974e-185	Mast_CPA3	C21orf91
RPL12	3.49192e-189	0.62861	0.986	0.858	1.14853e-184	Mast_CPA3	RPL12
CD86	7.30918e-189	-1.29615	0.001	0.368	2.40406e-184	Mast_CPA3	CD86
BMP2K	9.36639e-189	1.17247	0.484	0.184	3.0807e-184	Mast_CPA3	BMP2K
TLR2	2.82205e-188	-1.73029	0.003	0.37	9.282e-184	Mast_CPA3	TLR2
NINJ1	1.14455e-187	-1.66659	0.206	0.586	3.76453e-183	Mast_CPA3	NINJ1
MXD1	3.74783e-186	-1.97391	0.052	0.432	1.2327e-181	Mast_CPA3	MXD1
NBAS	4.14457e-185	0.917155	0.274	0.05	1.36319e-180	Mast_CPA3	NBAS
DACH1	5.76182e-185	0.55196	0.147	0.004	1.89512e-180	Mast_CPA3	DACH1
CSTA	9.31607e-185	-1.41229	0.003	0.365	3.06415e-180	Mast_CPA3	CSTA
TPST2	1.44087e-184	1.0398	0.398	0.123	4.73916e-180	Mast_CPA3	TPST2
MNDA	4.40884e-184	-1.85319	0.009	0.372	1.45011e-179	Mast_CPA3	MNDA
C1orf186	4.49337e-184	0.810771	0.141	0.003	1.47792e-179	Mast_CPA3	C1orf186
TMSB4X	4.73088e-184	-1.00424	0.956	0.975	1.55603e-179	Mast_CPA3	TMSB4X
TSPAN7	5.30995e-184	0.527877	0.134	0.002	1.7465e-179	Mast_CPA3	TSPAN7
RPS7	2.5806e-183	0.673397	0.98	0.823	8.48786e-179	Mast_CPA3	RPS7
CAPG	4.13348e-182	0.894383	0.865	0.577	1.35954e-177	Mast_CPA3	CAPG
ZYX	8.07339e-182	-1.4356	0.178	0.559	2.65542e-177	Mast_CPA3	ZYX
RPS4Y1	5.23983e-181	1.46161	0.569	0.282	1.72343e-176	Mast_CPA3	RPS4Y1
ALAS1	7.24208e-180	1.18281	0.359	0.099	2.38199e-175	Mast_CPA3	ALAS1
TNFAIP2	2.42187e-179	-1.53141	0.047	0.42	7.96577e-175	Mast_CPA3	TNFAIP2
GRN	3.04516e-179	-1.65702	0.321	0.629	1.00158e-174	Mast_CPA3	GRN
BIRC3	5.59228e-179	1.1657	0.542	0.221	1.83936e-174	Mast_CPA3	BIRC3
SLC44A1	1.03342e-178	0.987429	0.469	0.172	3.39903e-174	Mast_CPA3	SLC44A1
ABCD3	1.15636e-177	0.807702	0.221	0.029	3.80339e-173	Mast_CPA3	ABCD3
TSC22D3	2.20813e-177	1.27015	0.85	0.666	7.26276e-173	Mast_CPA3	TSC22D3
CFD	2.73662e-177	-1.61926	0.036	0.402	9.00103e-173	Mast_CPA3	CFD
RBM47	3.99829e-177	-1.52871	0.018	0.376	1.31508e-172	Mast_CPA3	RBM47
ITK	4.69513e-177	0.666989	0.165	0.01	1.54428e-172	Mast_CPA3	ITK
LY96	9.38733e-177	-1.3148	0.012	0.368	3.08759e-172	Mast_CPA3	LY96
RPL35A	1.2952e-176	0.714858	0.971	0.821	4.26004e-172	Mast_CPA3	RPL35A
FCER1A	2.01451e-176	0.672585	0.299	0.057	6.62592e-172	Mast_CPA3	FCER1A
HS6ST1	3.10219e-176	0.69681	0.212	0.026	1.02034e-171	Mast_CPA3	HS6ST1
MITF	4.40507e-176	0.994837	0.376	0.113	1.44887e-171	Mast_CPA3	MITF
IFITM10	9.87298e-176	0.755488	0.228	0.032	3.24732e-171	Mast_CPA3	IFITM10
CD68	2.2981e-175	-1.85134	0.217	0.557	7.55869e-171	Mast_CPA3	CD68
SLC8A3	4.26972e-175	0.527154	0.124	0.001	1.40435e-170	Mast_CPA3	SLC8A3
ETS2	1.31916e-174	-1.54416	0.137	0.514	4.33885e-170	Mast_CPA3	ETS2
RPL29	1.48601e-174	0.633077	0.971	0.822	4.88764e-170	Mast_CPA3	RPL29
C5orf30	4.24265e-174	0.670058	0.163	0.01	1.39545e-169	Mast_CPA3	C5orf30
MGAT1	9.17183e-174	-1.27039	0.129	0.504	3.01671e-169	Mast_CPA3	MGAT1
PREX1	2.93272e-173	-1.53382	0.013	0.363	9.64601e-169	Mast_CPA3	PREX1
LILRB4	4.73016e-173	-1.21556	0	0.342	1.5558e-168	Mast_CPA3	LILRB4
RPSA	4.02827e-172	0.881733	0.863	0.648	1.32494e-167	Mast_CPA3	RPSA
2024-03-03	7.66309e-172	0.807356	0.246	0.041	2.52047e-167	Mast_CPA3	2024-03-03
PLEKHO1	9.76119e-172	-1.23974	0.031	0.387	3.21055e-167	Mast_CPA3	PLEKHO1
RPS23	1.19767e-171	0.602583	0.987	0.848	3.93925e-167	Mast_CPA3	RPS23
RPS3A	1.25815e-171	0.697345	0.967	0.815	4.13819e-167	Mast_CPA3	RPS3A
WASH6P	1.8654e-171	1.47954	0.34	0.096	6.13548e-167	Mast_CPA3	WASH6P
RPL18	1.92157e-171	0.62964	0.979	0.836	6.32024e-167	Mast_CPA3	RPL18
RNASE6	1.45117e-170	-1.35347	0.003	0.343	4.77305e-166	Mast_CPA3	RNASE6
TCTEX1D1	4.85905e-169	0.582368	0.159	0.01	1.59819e-164	Mast_CPA3	TCTEX1D1
CSF1R	6.40841e-169	-1.15741	0.002	0.34	2.10779e-164	Mast_CPA3	CSF1R
ARPC2	6.57001e-169	-0.998878	0.628	0.797	2.16094e-164	Mast_CPA3	ARPC2
ATP2A3	7.64191e-169	0.746366	0.285	0.059	2.5135e-164	Mast_CPA3	ATP2A3
UBA7	5.21749e-168	0.824365	0.305	0.071	1.71608e-163	Mast_CPA3	UBA7
LGMN	6.95381e-168	-1.83148	0.01	0.349	2.28718e-163	Mast_CPA3	LGMN
GLIPR1	8.43174e-168	-1.12676	0.024	0.374	2.77328e-163	Mast_CPA3	GLIPR1
RPL19	5.9293e-167	0.578608	0.983	0.864	1.95021e-162	Mast_CPA3	RPL19
CD52	8.32423e-167	1.35069	0.616	0.33	2.73792e-162	Mast_CPA3	CD52
SH3BP5	5.25586e-166	-1.4097	0.01	0.347	1.72871e-161	Mast_CPA3	SH3BP5
RPL8	5.94188e-166	0.607396	0.982	0.85	1.95435e-161	Mast_CPA3	RPL8
CPVL	6.31476e-166	-1.39692	0.032	0.379	2.07699e-161	Mast_CPA3	CPVL
TENT5A	7.58219e-165	1.1527	0.35	0.1	2.49386e-160	Mast_CPA3	TENT5A
SCN7A	8.35715e-165	0.472928	0.114	0	2.74875e-160	Mast_CPA3	SCN7A
GABARAP	1.18406e-164	-0.897617	0.794	0.867	3.8945e-160	Mast_CPA3	GABARAP
CDC42EP3	2.03965e-164	0.87583	0.42	0.137	6.70861e-160	Mast_CPA3	CDC42EP3
CTSC	3.89697e-164	-1.81886	0.182	0.526	1.28175e-159	Mast_CPA3	CTSC
CXCL2	4.43297e-164	-2.76577	0.041	0.385	1.45805e-159	Mast_CPA3	CXCL2
MYB	1.33826e-163	0.604964	0.139	0.006	4.40167e-159	Mast_CPA3	MYB
RPS25	5.47634e-163	0.768223	0.957	0.808	1.80122e-158	Mast_CPA3	RPS25
LINC00511	8.32288e-163	0.483117	0.122	0.002	2.73748e-158	Mast_CPA3	LINC00511
GNG5	1.42621e-162	-1.10375	0.493	0.744	4.69096e-158	Mast_CPA3	GNG5
CSTB	5.93536e-162	-1.88003	0.481	0.711	1.9522e-157	Mast_CPA3	CSTB
RPL3	7.8618e-162	0.844477	0.924	0.77	2.58582e-157	Mast_CPA3	RPL3
ARHGAP18	4.71182e-161	1.07522	0.595	0.311	1.54976e-156	Mast_CPA3	ARHGAP18
CYTIP	4.84801e-161	-1.39991	0.048	0.399	1.59456e-156	Mast_CPA3	CYTIP
P2RY14	1.25112e-160	0.710384	0.201	0.026	4.11506e-156	Mast_CPA3	P2RY14
SCIN	4.4398e-160	0.476699	0.131	0.004	1.4603e-155	Mast_CPA3	SCIN
FCER1G	5.10611e-160	-1.02708	0.855	0.858	1.67945e-155	Mast_CPA3	FCER1G
SERP2	5.56983e-160	0.440801	0.114	0.001	1.83197e-155	Mast_CPA3	SERP2
AL078590.3	9.02584e-160	0.597131	0.171	0.016	2.96869e-155	Mast_CPA3	AL078590.3
RPS8	1.05989e-159	0.581551	0.984	0.852	3.48607e-155	Mast_CPA3	RPS8
PPP1R15A	4.28068e-159	0.908075	0.854	0.66	1.40796e-154	Mast_CPA3	PPP1R15A
IL1RN	6.48544e-159	-2.75835	0.017	0.344	2.13312e-154	Mast_CPA3	IL1RN
AC244502.1	1.65098e-158	0.456951	0.114	0.001	5.43023e-154	Mast_CPA3	AC244502.1
AL662860.1	1.9442e-158	0.904458	0.108	0	6.39466e-154	Mast_CPA3	AL662860.1
KCTD12	2.33847e-158	-1.07693	0.003	0.325	7.69145e-154	Mast_CPA3	KCTD12
TIE1	4.66558e-158	0.425788	0.12	0.002	1.53455e-153	Mast_CPA3	TIE1
MTCL1	1.08454e-157	0.451989	0.114	0.001	3.56715e-153	Mast_CPA3	MTCL1
KIF13B	2.15195e-157	1.05201	0.359	0.112	7.07797e-153	Mast_CPA3	KIF13B
HBEGF	2.37868e-157	-1.49038	0.007	0.329	7.82371e-153	Mast_CPA3	HBEGF
NFE2L3	1.74373e-156	0.911426	0.309	0.081	5.73531e-152	Mast_CPA3	NFE2L3
PAQR5	1.7283e-155	0.453384	0.122	0.003	5.68454e-151	Mast_CPA3	PAQR5
IL1RAPL1	2.83515e-155	0.468139	0.11	0.001	9.3251e-151	Mast_CPA3	IL1RAPL1
ARL4C	4.7315e-155	-1.45704	0.059	0.405	1.55624e-150	Mast_CPA3	ARL4C
PROM1	5.23843e-155	0.492876	0.11	0.001	1.72297e-150	Mast_CPA3	PROM1
IER2	8.02568e-154	1.01202	0.777	0.527	2.63973e-149	Mast_CPA3	IER2
MAPRE3	1.09682e-153	0.603213	0.178	0.02	3.60757e-149	Mast_CPA3	MAPRE3
H2AFY	4.19278e-153	-1.15563	0.209	0.546	1.37905e-148	Mast_CPA3	H2AFY
AL390957.1	4.35075e-153	0.783572	0.199	0.027	1.431e-148	Mast_CPA3	AL390957.1
ITGA9	5.62318e-153	0.813381	0.243	0.047	1.84952e-148	Mast_CPA3	ITGA9
HMOX1	1.08711e-152	-1.76622	0.012	0.329	3.57561e-148	Mast_CPA3	HMOX1
CD63	5.43836e-152	0.742624	0.916	0.72	1.78873e-147	Mast_CPA3	CD63
TMOD1	2.27102e-151	0.469187	0.122	0.004	7.4696e-147	Mast_CPA3	TMOD1
PRKCA	3.07456e-151	1.07413	0.314	0.088	1.01125e-146	Mast_CPA3	PRKCA
AL731557.1	6.21129e-151	0.431533	0.105	0	2.04295e-146	Mast_CPA3	AL731557.1
ACTN1	1.94801e-150	-1.20032	0.015	0.329	6.40721e-146	Mast_CPA3	ACTN1
CSF2RA	2.23251e-150	-1.16336	0.006	0.316	7.34296e-146	Mast_CPA3	CSF2RA
CSF3R	4.56212e-150	-2.17412	0.004	0.312	1.50053e-145	Mast_CPA3	CSF3R
EPB41L3	2.5265e-149	-0.992021	0.002	0.308	8.30992e-145	Mast_CPA3	EPB41L3
SLC25A37	3.06249e-149	-2.13921	0.085	0.413	1.00728e-144	Mast_CPA3	SLC25A37
IFITM3	4.3929e-149	-1.61207	0.539	0.777	1.44487e-144	Mast_CPA3	IFITM3
SEMA7A	5.98155e-149	0.756292	0.216	0.036	1.96739e-144	Mast_CPA3	SEMA7A
TTLL7	7.57237e-149	0.450742	0.111	0.002	2.49063e-144	Mast_CPA3	TTLL7
RAC1	1.03452e-148	-1.01348	0.576	0.752	3.40265e-144	Mast_CPA3	RAC1
AC020916.1	1.47559e-148	1.29493	0.565	0.293	4.85336e-144	Mast_CPA3	AC020916.1
EFNB2	1.49778e-148	0.566407	0.133	0.007	4.92636e-144	Mast_CPA3	EFNB2
THEMIS2	2.10709e-148	-1.09684	0.052	0.383	6.93044e-144	Mast_CPA3	THEMIS2
ARHGAP6	3.36133e-148	0.719731	0.213	0.034	1.10557e-143	Mast_CPA3	ARHGAP6
CHST12	4.65103e-148	0.778404	0.267	0.062	1.52977e-143	Mast_CPA3	CHST12
FCGR3A	5.64523e-148	-1.51391	0.003	0.307	1.85677e-143	Mast_CPA3	FCGR3A
IL5RA	1.13509e-147	0.411691	0.108	0.001	3.73342e-143	Mast_CPA3	IL5RA
SNHG8	4.78235e-147	1.04154	0.529	0.264	1.57296e-142	Mast_CPA3	SNHG8
SLC43A2	5.309e-147	-1.21199	0.027	0.344	1.74618e-142	Mast_CPA3	SLC43A2
HEG1	1.35855e-146	0.675224	0.199	0.03	4.46839e-142	Mast_CPA3	HEG1
GIHCG	2.25601e-146	0.577999	0.169	0.018	7.42024e-142	Mast_CPA3	GIHCG
ITGA2B	3.19189e-146	0.51395	0.105	0.001	1.04984e-141	Mast_CPA3	ITGA2B
RPS12	6.16362e-146	0.540024	0.99	0.868	2.02728e-141	Mast_CPA3	RPS12
KMT2E	6.73096e-146	0.932981	0.589	0.32	2.21388e-141	Mast_CPA3	KMT2E
LITAF	1.55147e-145	-1.67629	0.475	0.724	5.10293e-141	Mast_CPA3	LITAF
LINC00672	1.68589e-145	0.423134	0.114	0.003	5.54506e-141	Mast_CPA3	LINC00672
PLSCR1	2.60428e-145	-1.17046	0.101	0.443	8.56573e-141	Mast_CPA3	PLSCR1
HNMT	6.74353e-145	-0.940239	0.003	0.303	2.21801e-140	Mast_CPA3	HNMT
CLEC4E	9.08157e-145	-1.56396	0.001	0.299	2.98702e-140	Mast_CPA3	CLEC4E
LGALS2	1.04452e-144	-1.38805	0.006	0.307	3.43553e-140	Mast_CPA3	LGALS2
TNFRSF1A	1.38049e-144	-1.17302	0.009	0.311	4.54057e-140	Mast_CPA3	TNFRSF1A
LILRB2	1.60343e-144	-1.12497	0.04	0.361	5.27384e-140	Mast_CPA3	LILRB2
PRELID2	1.5506e-143	0.563274	0.159	0.016	5.10008e-139	Mast_CPA3	PRELID2
AGAP1	6.33039e-143	0.568362	0.117	0.004	2.08213e-138	Mast_CPA3	AGAP1
BLVRB	1.83279e-142	-1.21674	0.099	0.431	6.02824e-138	Mast_CPA3	BLVRB
TANC1	2.03058e-142	0.417275	0.111	0.003	6.67879e-138	Mast_CPA3	TANC1
SLC7A7	4.35296e-142	-0.965644	0.009	0.307	1.43173e-137	Mast_CPA3	SLC7A7
PROCR	8.46828e-142	0.752626	0.268	0.064	2.7853e-137	Mast_CPA3	PROCR
KRT19	1.20329e-141	0.701304	0.223	0.039	3.95773e-137	Mast_CPA3	KRT19
EFHD2	2.08738e-141	-1.14949	0.38	0.678	6.86562e-137	Mast_CPA3	EFHD2
HNRNPA2B1	2.14352e-141	0.784851	0.855	0.678	7.05025e-137	Mast_CPA3	HNRNPA2B1
CCL3L1	3.41481e-141	-2.98765	0.007	0.303	1.12316e-136	Mast_CPA3	CCL3L1
B4GALT5	4.47054e-141	0.864223	0.448	0.18	1.47041e-136	Mast_CPA3	B4GALT5
CLCN3	5.33163e-141	0.727811	0.245	0.053	1.75363e-136	Mast_CPA3	CLCN3
HLA-B	2.97218e-140	-0.766225	0.896	0.951	9.7758e-136	Mast_CPA3	HLA-B
PLAUR	5.85902e-140	-1.86479	0.422	0.679	1.92709e-135	Mast_CPA3	PLAUR
SOX13	4.33311e-139	0.414337	0.112	0.004	1.4252e-134	Mast_CPA3	SOX13
FHL1	6.47955e-139	0.515161	0.138	0.01	2.13119e-134	Mast_CPA3	FHL1
INKA1	1.79844e-138	0.465553	0.121	0.006	5.91526e-134	Mast_CPA3	INKA1
GK	1.99153e-138	-1.76275	0.133	0.455	6.55034e-134	Mast_CPA3	GK
ST3GAL4	2.06662e-138	0.685254	0.216	0.039	6.79733e-134	Mast_CPA3	ST3GAL4
SLC31A2	3.89985e-138	-0.939369	0.016	0.313	1.2827e-133	Mast_CPA3	SLC31A2
HS3ST1	4.70754e-138	0.923277	0.285	0.075	1.54836e-133	Mast_CPA3	HS3ST1
CATSPER1	2.19933e-137	0.729093	0.256	0.059	7.23381e-133	Mast_CPA3	CATSPER1
GPX1P1	2.61364e-137	-1.43272	0.651	0.736	8.59653e-133	Mast_CPA3	GPX1P1
MAPK1	3.1995e-137	0.982109	0.478	0.227	1.05235e-132	Mast_CPA3	MAPK1
TSPYL1	9.28661e-137	0.907766	0.345	0.116	3.05446e-132	Mast_CPA3	TSPYL1
JDP2	1.00882e-136	-1.23183	0.028	0.329	3.3181e-132	Mast_CPA3	JDP2
PRPS2	9.62581e-136	0.895643	0.266	0.068	3.16603e-131	Mast_CPA3	PRPS2
STX3	1.25271e-135	0.665022	0.309	0.087	4.1203e-131	Mast_CPA3	STX3
BID	2.32888e-135	-1.13102	0.083	0.405	7.65993e-131	Mast_CPA3	BID
DDX5	5.49439e-135	0.875776	0.836	0.664	1.80716e-130	Mast_CPA3	DDX5
THBD	1.55726e-134	-1.41678	0.002	0.284	5.122e-130	Mast_CPA3	THBD
RPL22	1.83021e-134	0.641091	0.949	0.775	6.01973e-130	Mast_CPA3	RPL22
CFLAR	3.65179e-134	-1.23888	0.163	0.495	1.20111e-129	Mast_CPA3	CFLAR
FABP5	6.0437e-134	-1.87824	0.09	0.399	1.98783e-129	Mast_CPA3	FABP5
REPS1	8.18918e-134	0.766096	0.25	0.059	2.6935e-129	Mast_CPA3	REPS1
PFKFB3	8.38056e-134	-1.62102	0.099	0.414	2.75645e-129	Mast_CPA3	PFKFB3
ISG20	8.14931e-133	-1.50544	0.05	0.355	2.68039e-128	Mast_CPA3	ISG20
LILRB3	1.60704e-132	-1.14572	0.001	0.277	5.28573e-128	Mast_CPA3	LILRB3
KYNU	6.04185e-132	-1.00739	0.021	0.31	1.98722e-127	Mast_CPA3	KYNU
PLA2G7	8.37736e-132	-1.26537	0.002	0.279	2.7554e-127	Mast_CPA3	PLA2G7
RPL26	9.34661e-132	0.617789	0.968	0.836	3.07419e-127	Mast_CPA3	RPL26
FYN	1.78639e-131	0.855243	0.341	0.111	5.8756e-127	Mast_CPA3	FYN
AQP9	1.80769e-131	-1.98313	0.003	0.281	5.94566e-127	Mast_CPA3	AQP9
ARPC1B	2.11322e-131	-0.997675	0.556	0.732	6.95058e-127	Mast_CPA3	ARPC1B
BEX4	3.61208e-131	0.878735	0.407	0.169	1.18805e-126	Mast_CPA3	BEX4
SLC8A1	5.96296e-131	-1.32869	0.002	0.277	1.96128e-126	Mast_CPA3	SLC8A1
HINT1	1.44168e-130	-1.08881	0.3	0.598	4.74185e-126	Mast_CPA3	HINT1
CLIC1	2.09408e-130	0.606758	0.93	0.793	6.88765e-126	Mast_CPA3	CLIC1
TSTD1	2.17748e-130	0.726333	0.364	0.13	7.16196e-126	Mast_CPA3	TSTD1
RPS5	8.53675e-130	0.621963	0.923	0.766	2.80782e-125	Mast_CPA3	RPS5
PTPN7	9.7127e-130	0.811038	0.334	0.11	3.1946e-125	Mast_CPA3	PTPN7
VCAN	1.0817e-129	-1.73213	0.002	0.275	3.55783e-125	Mast_CPA3	VCAN
NFKBIA	1.83053e-129	0.62448	0.952	0.834	6.02079e-125	Mast_CPA3	NFKBIA
BMPR1A	1.90895e-129	0.467102	0.131	0.01	6.27874e-125	Mast_CPA3	BMPR1A
IRF8	2.02922e-129	-0.996669	0.005	0.28	6.67429e-125	Mast_CPA3	IRF8
EIF4A2	1.01452e-128	0.995368	0.531	0.284	3.33685e-124	Mast_CPA3	EIF4A2
TDRD3	1.20666e-128	0.604916	0.173	0.025	3.96882e-124	Mast_CPA3	TDRD3
RASSF4	2.67214e-127	-0.939401	0.005	0.276	8.78894e-123	Mast_CPA3	RASSF4
ST3GAL3	4.10944e-127	0.457411	0.127	0.01	1.35164e-122	Mast_CPA3	ST3GAL3
PPIF	1.4761e-126	-1.66667	0.078	0.378	4.85506e-122	Mast_CPA3	PPIF
NFIA	4.01825e-126	0.648129	0.18	0.028	1.32164e-121	Mast_CPA3	NFIA
RHBDD2	4.22696e-126	0.920416	0.438	0.194	1.39029e-121	Mast_CPA3	RHBDD2
CCNI	6.59428e-126	0.78602	0.78	0.597	2.16893e-121	Mast_CPA3	CCNI
RNASET2	1.10895e-125	-1.1736	0.299	0.584	3.64745e-121	Mast_CPA3	RNASET2
ODF3B	2.14586e-125	-0.969395	0.076	0.379	7.05796e-121	Mast_CPA3	ODF3B
AHR	2.5062e-125	1.17866	0.504	0.269	8.24314e-121	Mast_CPA3	AHR
ATP6V1B2	5.38723e-125	-1.04919	0.089	0.398	1.77191e-120	Mast_CPA3	ATP6V1B2
SKP1	7.51839e-125	0.760659	0.758	0.553	2.47287e-120	Mast_CPA3	SKP1
VPS37B	8.27053e-125	0.70971	0.433	0.176	2.72026e-120	Mast_CPA3	VPS37B
LPCAT2	8.27958e-125	0.81806	0.36	0.135	2.72324e-120	Mast_CPA3	LPCAT2
NPC2	2.75183e-124	-1.21429	0.633	0.735	9.05104e-120	Mast_CPA3	NPC2
FGR	2.94408e-124	-1.2502	0.074	0.371	9.68337e-120	Mast_CPA3	FGR
HCLS1	1.08967e-123	-1.17764	0.329	0.611	3.58402e-119	Mast_CPA3	HCLS1
RPL17	1.90142e-123	0.655736	0.905	0.748	6.25396e-119	Mast_CPA3	RPL17
CYTH3	2.3423e-123	0.56344	0.163	0.023	7.70404e-119	Mast_CPA3	CYTH3
MMP19	4.46906e-123	-1.3681	0.001	0.261	1.46992e-118	Mast_CPA3	MMP19
GALNT3	4.86527e-123	0.517037	0.165	0.023	1.60024e-118	Mast_CPA3	GALNT3
DTNBP1	5.47039e-123	0.998929	0.32	0.111	1.79927e-118	Mast_CPA3	DTNBP1
DAB2	5.58608e-123	-1.22767	0.04	0.321	1.83732e-118	Mast_CPA3	DAB2
GSE1	8.31617e-123	0.791142	0.226	0.052	2.73527e-118	Mast_CPA3	GSE1
YES1	1.00543e-122	0.485265	0.131	0.012	3.30696e-118	Mast_CPA3	YES1
ANKRD44	2.77662e-122	0.883119	0.415	0.177	9.13257e-118	Mast_CPA3	ANKRD44
TNFAIP3	3.63343e-122	1.14324	0.788	0.641	1.19507e-117	Mast_CPA3	TNFAIP3
LY86	6.46861e-122	-0.787555	0.003	0.264	2.12759e-117	Mast_CPA3	LY86
IL1R2	7.88009e-122	-3.02172	0.006	0.267	2.59184e-117	Mast_CPA3	IL1R2
LILRA5	8.36502e-122	-1.13134	0.002	0.261	2.75134e-117	Mast_CPA3	LILRA5
NR4A2	8.43372e-122	1.10923	0.701	0.479	2.77393e-117	Mast_CPA3	NR4A2
FDX1	8.90295e-122	1.32006	0.443	0.216	2.92827e-117	Mast_CPA3	FDX1
LRP1	1.08404e-121	-0.864219	0.004	0.265	3.56551e-117	Mast_CPA3	LRP1
EEF2	1.59143e-121	0.739119	0.805	0.62	5.23436e-117	Mast_CPA3	EEF2
DAD1	3.11231e-121	0.84856	0.656	0.427	1.02367e-116	Mast_CPA3	DAD1
KIAA1147	6.33051e-121	0.700316	0.225	0.051	2.08217e-116	Mast_CPA3	KIAA1147
CCDC18-AS1	7.47529e-121	0.720503	0.227	0.053	2.4587e-116	Mast_CPA3	CCDC18-AS1
ATOX1	1.82637e-120	-1.20804	0.241	0.539	6.00711e-116	Mast_CPA3	ATOX1
PPM1H	1.94553e-120	0.531191	0.143	0.016	6.39903e-116	Mast_CPA3	PPM1H
CD93	5.77774e-120	-1.02014	0.002	0.257	1.90036e-115	Mast_CPA3	CD93
RPL31	6.76072e-120	1.11188	0.848	0.667	2.22367e-115	Mast_CPA3	RPL31
RPS15A	9.61757e-120	0.49244	0.978	0.861	3.16331e-115	Mast_CPA3	RPS15A
RASGRP4	9.7778e-120	0.545791	0.247	0.061	3.21602e-115	Mast_CPA3	RASGRP4
TTC39B	1.44744e-119	0.475716	0.144	0.017	4.76077e-115	Mast_CPA3	TTC39B
MPEG1	1.52654e-119	-0.905075	0.001	0.255	5.02096e-115	Mast_CPA3	MPEG1
SMAD3	1.71228e-119	0.629054	0.206	0.042	5.63186e-115	Mast_CPA3	SMAD3
ELF1	7.62664e-119	0.68861	0.619	0.375	2.50848e-114	Mast_CPA3	ELF1
SQSTM1	1.32372e-118	0.708443	0.806	0.605	4.35385e-114	Mast_CPA3	SQSTM1
WASH4P	4.66284e-118	1.11057	0.171	0.029	1.53366e-113	Mast_CPA3	WASH4P
FAM49A	5.68278e-118	-1.04621	0.058	0.344	1.86912e-113	Mast_CPA3	FAM49A
MS4A4A	8.79377e-118	-1.2477	0.033	0.304	2.89236e-113	Mast_CPA3	MS4A4A
ADA2	3.41049e-117	-0.819884	0.002	0.253	1.12174e-112	Mast_CPA3	ADA2
IL13RA1	5.34888e-117	-0.798596	0.004	0.256	1.7593e-112	Mast_CPA3	IL13RA1
CTSA	7.90855e-117	-1.03616	0.074	0.357	2.6012e-112	Mast_CPA3	CTSA
CLEC4A	1.44571e-116	-0.910114	0.002	0.252	4.75507e-112	Mast_CPA3	CLEC4A
SVIP	2.16899e-116	0.746223	0.241	0.063	7.13403e-112	Mast_CPA3	SVIP
FCN1	5.27503e-116	-1.68115	0	0.247	1.73501e-111	Mast_CPA3	FCN1
TTI1	1.0562e-115	0.579431	0.145	0.018	3.47396e-111	Mast_CPA3	TTI1
MRC1	1.80712e-115	-1.1319	0.001	0.248	5.94381e-111	Mast_CPA3	MRC1
SMCO4	2.44884e-115	-0.77549	0.017	0.277	8.05448e-111	Mast_CPA3	SMCO4
ATF3	3.39271e-115	-1.14744	0.168	0.477	1.1159e-110	Mast_CPA3	ATF3
AC068587.4	3.7916e-115	0.653593	0.184	0.034	1.24709e-110	Mast_CPA3	AC068587.4
PIK3C2B	5.70521e-115	0.408017	0.112	0.008	1.8765e-110	Mast_CPA3	PIK3C2B
ID2	6.43802e-115	1.47024	0.531	0.283	2.11753e-110	Mast_CPA3	ID2
BNC2	1.00166e-114	0.649947	0.16	0.024	3.29455e-110	Mast_CPA3	BNC2
FBXO34	1.88118e-114	0.760667	0.335	0.12	6.1874e-110	Mast_CPA3	FBXO34
SH3PXD2B	2.7032e-114	-0.817278	0.002	0.248	8.89111e-110	Mast_CPA3	SH3PXD2B
EEF1B2	4.36863e-114	0.648588	0.871	0.678	1.43688e-109	Mast_CPA3	EEF1B2
PIK3R5	5.5617e-114	-1.23109	0.023	0.283	1.8293e-109	Mast_CPA3	PIK3R5
PCNX4	9.76977e-114	0.85766	0.28	0.087	3.21338e-109	Mast_CPA3	PCNX4
EEF1G	2.19072e-113	0.756644	0.739	0.518	7.20549e-109	Mast_CPA3	EEF1G
PHF20	4.41722e-113	0.716819	0.497	0.254	1.45287e-108	Mast_CPA3	PHF20
RASSF5	7.72788e-113	0.844612	0.432	0.202	2.54178e-108	Mast_CPA3	RASSF5
SLC1A5	3.54378e-112	0.805706	0.29	0.096	1.16558e-107	Mast_CPA3	SLC1A5
CD44	4.04444e-112	0.575899	0.852	0.624	1.33026e-107	Mast_CPA3	CD44
CXCL3	6.07563e-112	-2.67322	0.032	0.287	1.99833e-107	Mast_CPA3	CXCL3
CFP	7.10754e-112	-0.97704	0.002	0.244	2.33774e-107	Mast_CPA3	CFP
VAT1	1.025e-111	0.84067	0.387	0.162	3.37132e-107	Mast_CPA3	VAT1
NLRP3	1.49779e-111	-2.00632	0.086	0.362	4.92637e-107	Mast_CPA3	NLRP3
ARMCX3	3.13846e-111	0.822408	0.359	0.148	1.03227e-106	Mast_CPA3	ARMCX3
APLP2	2.06575e-110	-1.06339	0.173	0.465	6.79445e-106	Mast_CPA3	APLP2
ELOVL5	5.25592e-110	0.782284	0.409	0.182	1.72873e-105	Mast_CPA3	ELOVL5
ABI3	1.0234e-109	-0.783752	0.007	0.249	3.36606e-105	Mast_CPA3	ABI3
IL10RA	1.81404e-109	-0.802927	0.036	0.299	5.96657e-105	Mast_CPA3	IL10RA
NEK1	2.26214e-109	0.605608	0.198	0.043	7.44041e-105	Mast_CPA3	NEK1
GNB2	2.56721e-109	-0.976793	0.32	0.598	8.4438e-105	Mast_CPA3	GNB2
ARRB2	3.22884e-109	-1.01866	0.237	0.534	1.062e-104	Mast_CPA3	ARRB2
ZNF385A	3.36343e-109	-0.678787	0.002	0.238	1.10627e-104	Mast_CPA3	ZNF385A
ABCB8	3.48715e-109	0.558993	0.203	0.046	1.14696e-104	Mast_CPA3	ABCB8
CD4	4.9149e-109	-0.813204	0.044	0.308	1.61656e-104	Mast_CPA3	CD4
DOCK4	8.3158e-109	-1.59112	0.003	0.24	2.73515e-104	Mast_CPA3	DOCK4
RAB20	8.94049e-109	-1.01802	0.105	0.389	2.94062e-104	Mast_CPA3	RAB20
BEX2	1.99804e-108	0.460723	0.116	0.01	6.57174e-104	Mast_CPA3	BEX2
RPL9	5.71187e-108	0.800435	0.919	0.762	1.87869e-103	Mast_CPA3	RPL9
OGFRL1	6.25616e-108	-0.937684	0.032	0.287	2.05771e-103	Mast_CPA3	OGFRL1
RENBP	1.03498e-107	0.800845	0.431	0.208	3.40416e-103	Mast_CPA3	RENBP
METTL21A	1.76362e-107	0.833532	0.261	0.08	5.80072e-103	Mast_CPA3	METTL21A
ALDH1A1	4.10759e-107	0.648014	0.284	0.09	1.35103e-102	Mast_CPA3	ALDH1A1
TWISTNB	4.23823e-107	0.743304	0.36	0.14	1.394e-102	Mast_CPA3	TWISTNB
EREG	3.45663e-106	-1.81729	0.036	0.285	1.13692e-101	Mast_CPA3	EREG
NFIL3	9.86025e-106	-1.01934	0.055	0.319	3.24313e-101	Mast_CPA3	NFIL3
CERS4	1.16656e-105	0.46438	0.144	0.021	3.83695e-101	Mast_CPA3	CERS4
MAGED2	1.82737e-105	0.717978	0.279	0.094	6.01041e-101	Mast_CPA3	MAGED2
ADAP2	7.00586e-105	-0.708184	0.003	0.232	2.3043e-100	Mast_CPA3	ADAP2
HSD17B12	6.84789e-104	0.779094	0.319	0.123	2.25234e-99	Mast_CPA3	HSD17B12
RNF149	7.66397e-104	-1.63548	0.246	0.531	2.52076e-99	Mast_CPA3	RNF149
BASP1	8.44069e-104	-1.61121	0.222	0.493	2.77623e-99	Mast_CPA3	BASP1
NCL	2.10291e-103	0.775498	0.645	0.434	6.91669e-99	Mast_CPA3	NCL
C11orf49	2.32284e-103	0.553339	0.183	0.039	7.64004e-99	Mast_CPA3	C11orf49
TCIRG1	6.31714e-103	-0.94507	0.154	0.441	2.07777e-98	Mast_CPA3	TCIRG1
NDEL1	7.23497e-103	0.640179	0.394	0.17	2.37965e-98	Mast_CPA3	NDEL1
FYB1	1.623e-102	-1.23194	0.159	0.434	5.3382e-98	Mast_CPA3	FYB1
SLC9A1	3.80086e-102	0.503887	0.178	0.036	1.25014e-97	Mast_CPA3	SLC9A1
PRELID1	4.4072e-102	-1.03441	0.277	0.543	1.44957e-97	Mast_CPA3	PRELID1
FPR3	1.74086e-101	-0.731068	0.005	0.231	5.72585e-97	Mast_CPA3	FPR3
PARP4	1.81662e-101	0.75913	0.315	0.121	5.97504e-97	Mast_CPA3	PARP4
FGL2	3.89212e-101	-1.1539	0.141	0.41	1.28016e-96	Mast_CPA3	FGL2
RPS9	5.38465e-101	-0.64587	0.885	0.913	1.77106e-96	Mast_CPA3	RPS9
FAM46A	5.5174e-101	0.708657	0.118	0.013	1.81473e-96	Mast_CPA3	FAM46A
RHOB	8.21475e-101	-1.34929	0.159	0.432	2.70191e-96	Mast_CPA3	RHOB
PLBD1	8.36779e-101	-0.752836	0.003	0.225	2.75225e-96	Mast_CPA3	PLBD1
FGD4	1.12593e-100	-1.35247	0.005	0.229	3.70329e-96	Mast_CPA3	FGD4
HRH2	1.3613e-100	-0.853051	0.002	0.223	4.47747e-96	Mast_CPA3	HRH2
NDST2	1.56595e-100	0.73063	0.243	0.072	5.15057e-96	Mast_CPA3	NDST2
ALDH2	1.63024e-100	-0.897031	0.092	0.358	5.36203e-96	Mast_CPA3	ALDH2
RGCC	5.0729e-100	-1.31948	0.065	0.319	1.66853e-95	Mast_CPA3	RGCC
ANPEP	7.99076e-100	-1.14889	0.059	0.308	2.62824e-95	Mast_CPA3	ANPEP
RPL7	9.04147e-100	1.10269	0.823	0.653	2.97383e-95	Mast_CPA3	RPL7
CCL4L2	1.91229e-99	-2.78157	0.11	0.369	6.28971e-95	Mast_CPA3	CCL4L2
UBE2E2	3.25029e-99	-0.67045	0.012	0.239	1.06905e-94	Mast_CPA3	UBE2E2
S100A12	3.42932e-99	-1.98983	0.001	0.218	1.12794e-94	Mast_CPA3	S100A12
CD300E	3.56355e-99	-1.16338	0.001	0.217	1.17209e-94	Mast_CPA3	CD300E
GCA	4.14382e-99	-1.26832	0.104	0.376	1.36294e-94	Mast_CPA3	GCA
GPNMB	5.19602e-99	-1.23889	0.01	0.233	1.70902e-94	Mast_CPA3	GPNMB
MSRA	5.99139e-99	0.705761	0.347	0.148	1.97063e-94	Mast_CPA3	MSRA
SLAMF8	6.84403e-99	-0.665014	0.001	0.218	2.25107e-94	Mast_CPA3	SLAMF8
PTK2	1.8529e-98	0.452097	0.144	0.023	6.09437e-94	Mast_CPA3	PTK2
AOAH	2.81447e-98	-0.816906	0.005	0.223	9.25707e-94	Mast_CPA3	AOAH
ADARB1	3.43127e-98	0.517877	0.183	0.04	1.12858e-93	Mast_CPA3	ADARB1
PPDPF	5.34776e-98	0.698926	0.736	0.543	1.75893e-93	Mast_CPA3	PPDPF
RPL10A	8.43748e-98	0.633594	0.866	0.699	2.77517e-93	Mast_CPA3	RPL10A
GIMAP4	2.71136e-97	-0.833192	0.012	0.234	8.91792e-93	Mast_CPA3	GIMAP4
HNRNPA1	3.58688e-97	0.748582	0.778	0.593	1.17976e-92	Mast_CPA3	HNRNPA1
OLR1	4.33873e-97	-1.19508	0.002	0.217	1.42705e-92	Mast_CPA3	OLR1
CD36	4.90515e-97	-0.81856	0.002	0.216	1.61335e-92	Mast_CPA3	CD36
PAPSS2	8.5025e-97	-1.03952	0.02	0.246	2.79656e-92	Mast_CPA3	PAPSS2
EGR1	1.04833e-96	1.21633	0.442	0.213	3.44805e-92	Mast_CPA3	EGR1
HYI	4.98889e-96	0.604894	0.226	0.066	1.6409e-91	Mast_CPA3	HYI
ARID1B	5.92319e-96	0.822156	0.334	0.14	1.9482e-91	Mast_CPA3	ARID1B
TNFRSF4	6.60908e-96	0.592842	0.203	0.051	2.17379e-91	Mast_CPA3	TNFRSF4
CKLF	1.13096e-95	0.593905	0.647	0.414	3.71984e-91	Mast_CPA3	CKLF
PHC2	1.50257e-95	-1.03491	0.08	0.336	4.94212e-91	Mast_CPA3	PHC2
SKIL	1.99123e-95	0.679238	0.455	0.233	6.54934e-91	Mast_CPA3	SKIL
IFNGR2	3.5013e-95	-0.974241	0.274	0.539	1.15161e-90	Mast_CPA3	IFNGR2
BCL2A1	4.73074e-95	-1.67982	0.429	0.66	1.55599e-90	Mast_CPA3	BCL2A1
PRKD3	6.25185e-95	0.597557	0.222	0.063	2.0563e-90	Mast_CPA3	PRKD3
ZFP36L2	1.61678e-94	1.06954	0.698	0.504	5.31774e-90	Mast_CPA3	ZFP36L2
RPL13	2.29052e-94	0.474007	0.989	0.867	7.53376e-90	Mast_CPA3	RPL13
ZNF664	4.57524e-94	0.708572	0.198	0.051	1.50484e-89	Mast_CPA3	ZNF664
CRBN	6.86997e-94	0.693152	0.244	0.078	2.2596e-89	Mast_CPA3	CRBN
ATP2B1	7.52897e-94	-1.11598	0.08	0.327	2.47635e-89	Mast_CPA3	ATP2B1
SIRPA	9.19929e-94	-0.774279	0.052	0.294	3.02574e-89	Mast_CPA3	SIRPA
ARPC5	1.43081e-93	-0.875667	0.418	0.65	4.70606e-89	Mast_CPA3	ARPC5
VSIG4	3.35293e-93	-0.842581	0.002	0.208	1.10281e-88	Mast_CPA3	VSIG4
JUNB	6.33109e-93	0.805176	0.9	0.778	2.08236e-88	Mast_CPA3	JUNB
AHI1	7.93432e-93	0.630542	0.221	0.064	2.60968e-88	Mast_CPA3	AHI1
GSTM3	4.14077e-92	0.748867	0.178	0.041	1.36194e-87	Mast_CPA3	GSTM3
PDZD8	5.30575e-92	0.588487	0.241	0.075	1.74511e-87	Mast_CPA3	PDZD8
AP1S3	8.63173e-92	0.487181	0.138	0.023	2.83906e-87	Mast_CPA3	AP1S3
ZFP36	9.57092e-92	0.771753	0.91	0.818	3.14797e-87	Mast_CPA3	ZFP36
BTN3A2	1.13549e-91	0.608439	0.237	0.075	3.73473e-87	Mast_CPA3	BTN3A2
GSTO1	1.20307e-91	-0.910168	0.346	0.588	3.95703e-87	Mast_CPA3	GSTO1
JAML	1.39785e-91	-1.02192	0.004	0.209	4.59768e-87	Mast_CPA3	JAML
BRD2	1.5533e-91	0.901942	0.505	0.312	5.10897e-87	Mast_CPA3	BRD2
ZBTB16	2.2723e-91	0.551909	0.29	0.102	7.47382e-87	Mast_CPA3	ZBTB16
MAP2K1	3.43336e-91	-0.948398	0.084	0.334	1.12927e-86	Mast_CPA3	MAP2K1
SDS	3.61291e-91	-1.31406	0.002	0.205	1.18832e-86	Mast_CPA3	SDS
RBM39	1.08021e-90	0.641823	0.659	0.46	3.55292e-86	Mast_CPA3	RBM39
PIM2	1.18986e-90	0.718169	0.262	0.089	3.91357e-86	Mast_CPA3	PIM2
NOP10	1.48413e-90	-0.935681	0.36	0.611	4.88145e-86	Mast_CPA3	NOP10
ATP10A	2.04981e-90	0.467301	0.13	0.02	6.74203e-86	Mast_CPA3	ATP10A
SEMA4D	5.71705e-90	0.660068	0.35	0.152	1.88039e-85	Mast_CPA3	SEMA4D
JPT1	8.35852e-90	-0.925532	0.122	0.378	2.7492e-85	Mast_CPA3	JPT1
CHD7	1.60287e-89	0.44721	0.201	0.052	5.27201e-85	Mast_CPA3	CHD7
TRERF1	1.60987e-89	0.495067	0.156	0.032	5.29503e-85	Mast_CPA3	TRERF1
CXCR4	1.76253e-89	-1.24956	0.171	0.437	5.79713e-85	Mast_CPA3	CXCR4
REL	3.01499e-89	0.733307	0.685	0.488	9.91659e-85	Mast_CPA3	REL
SLC1A3	3.52734e-89	-0.705569	0.002	0.2	1.16018e-84	Mast_CPA3	SLC1A3
PTPN12	7.93946e-89	-0.906545	0.086	0.333	2.61137e-84	Mast_CPA3	PTPN12
PNRC1	1.27701e-88	-1.11985	0.705	0.798	4.20021e-84	Mast_CPA3	PNRC1
FCGR2B	1.29999e-88	-0.85798	0.009	0.212	4.27578e-84	Mast_CPA3	FCGR2B
GLRX	1.74183e-88	-0.850023	0.13	0.391	5.72905e-84	Mast_CPA3	GLRX
LAPTM4B	1.99786e-88	0.480681	0.144	0.027	6.57116e-84	Mast_CPA3	LAPTM4B
GABPB1	2.33699e-88	0.674189	0.278	0.103	7.6866e-84	Mast_CPA3	GABPB1
C1orf54	3.92971e-88	-0.744306	0.013	0.218	1.29252e-83	Mast_CPA3	C1orf54
LILRB1	4.00362e-88	-0.624372	0	0.195	1.31683e-83	Mast_CPA3	LILRB1
ELL2	4.27755e-88	0.50579	0.617	0.392	1.40693e-83	Mast_CPA3	ELL2
RHOA	4.45819e-88	-0.712229	0.699	0.798	1.46634e-83	Mast_CPA3	RHOA
THBS1	6.06629e-88	-1.67263	0.093	0.336	1.99526e-83	Mast_CPA3	THBS1
SLC4A8	6.48483e-88	0.439303	0.119	0.017	2.13293e-83	Mast_CPA3	SLC4A8
YWHAH	6.78271e-88	-1.01755	0.183	0.439	2.2309e-83	Mast_CPA3	YWHAH
EXD3	1.09859e-87	0.480867	0.144	0.027	3.61337e-83	Mast_CPA3	EXD3
RNASE1	1.30014e-87	-2.78164	0.029	0.24	4.2763e-83	Mast_CPA3	RNASE1
PDXK	1.99507e-87	-0.815648	0.133	0.386	6.56199e-83	Mast_CPA3	PDXK
TEC	3.40548e-87	0.504945	0.145	0.028	1.1201e-82	Mast_CPA3	TEC
ATP8B4	3.87046e-87	0.707441	0.227	0.072	1.27303e-82	Mast_CPA3	ATP8B4
HIPK2	6.22772e-87	0.810803	0.373	0.178	2.04836e-82	Mast_CPA3	HIPK2
SLC15A3	8.93466e-87	-0.68034	0.024	0.236	2.9387e-82	Mast_CPA3	SLC15A3
RPS6	1.12822e-86	0.729733	0.923	0.799	3.71082e-82	Mast_CPA3	RPS6
TFRC	1.22618e-86	-0.904426	0.039	0.257	4.03302e-82	Mast_CPA3	TFRC
MLF1	1.40787e-86	0.416135	0.103	0.012	4.63064e-82	Mast_CPA3	MLF1
GNAI2	1.42438e-86	-0.818318	0.514	0.694	4.68492e-82	Mast_CPA3	GNAI2
LEPROTL1	1.64782e-86	0.728266	0.449	0.25	5.41983e-82	Mast_CPA3	LEPROTL1
RAPGEF2	2.54766e-86	0.706365	0.318	0.13	8.37952e-82	Mast_CPA3	RAPGEF2
CREG1	2.8606e-86	-1.04998	0.17	0.414	9.40881e-82	Mast_CPA3	CREG1
EIF3E	4.13339e-86	0.896981	0.562	0.379	1.35951e-81	Mast_CPA3	EIF3E
DPY19L1	6.95891e-86	0.433965	0.146	0.029	2.28886e-81	Mast_CPA3	DPY19L1
RASA2	1.42945e-85	0.586377	0.296	0.114	4.70161e-81	Mast_CPA3	RASA2
CD302	1.60633e-85	-0.804548	0.071	0.308	5.28338e-81	Mast_CPA3	CD302
MCUB	3.80037e-85	-0.611638	0.02	0.226	1.24998e-80	Mast_CPA3	MCUB
PSAP	5.04608e-85	-1.09509	0.79	0.801	1.65971e-80	Mast_CPA3	PSAP
PECAM1	6.95591e-85	-0.845599	0.028	0.238	2.28787e-80	Mast_CPA3	PECAM1
LAP3	8.23522e-85	-0.81082	0.13	0.377	2.70865e-80	Mast_CPA3	LAP3
PDE7B	1.52544e-84	0.409763	0.104	0.012	5.01733e-80	Mast_CPA3	PDE7B
UBE2D1	2.25847e-84	-0.858585	0.097	0.339	7.42835e-80	Mast_CPA3	UBE2D1
EEF1D	3.33327e-84	0.493359	0.897	0.747	1.09634e-79	Mast_CPA3	EEF1D
CNIH1	3.8728e-84	0.804516	0.406	0.22	1.2738e-79	Mast_CPA3	CNIH1
RALA	4.82207e-84	-0.779628	0.108	0.35	1.58603e-79	Mast_CPA3	RALA
MMP9	8.82572e-84	-1.95436	0.002	0.191	2.90287e-79	Mast_CPA3	MMP9
SARAF	9.06065e-84	0.844759	0.615	0.465	2.98014e-79	Mast_CPA3	SARAF
KCNQ1OT1	9.59435e-84	0.502726	0.135	0.025	3.15568e-79	Mast_CPA3	KCNQ1OT1
RILPL2	1.36597e-83	-1.15099	0.296	0.541	4.4928e-79	Mast_CPA3	RILPL2
CORO1A	1.51149e-83	-1.04579	0.26	0.495	4.97143e-79	Mast_CPA3	CORO1A
ADM	1.58881e-83	-1.55814	0.006	0.198	5.22576e-79	Mast_CPA3	ADM
SQOR	1.91886e-83	-0.728412	0.052	0.275	6.31133e-79	Mast_CPA3	SQOR
PDK4	2.22126e-83	-1.31565	0.018	0.217	7.30594e-79	Mast_CPA3	PDK4
EIF4B	2.80519e-83	0.773917	0.484	0.3	9.22654e-79	Mast_CPA3	EIF4B
NUTM2A-AS1	6.19776e-83	0.707585	0.323	0.144	2.03851e-78	Mast_CPA3	NUTM2A-AS1
HBS1L	9.32458e-83	0.612724	0.203	0.061	3.06695e-78	Mast_CPA3	HBS1L
ATP6V0B	1.07899e-82	-0.826448	0.496	0.673	3.54891e-78	Mast_CPA3	ATP6V0B
FLNB	2.30853e-82	0.560917	0.214	0.066	7.59298e-78	Mast_CPA3	FLNB
SMAP2	2.75073e-82	-1.19748	0.316	0.567	9.04743e-78	Mast_CPA3	SMAP2
FAIM	3.00936e-82	0.456923	0.146	0.031	9.8981e-78	Mast_CPA3	FAIM
PDCD4	6.36404e-82	0.605083	0.357	0.168	2.0932e-77	Mast_CPA3	PDCD4
UQCR11	6.44197e-82	-0.867888	0.402	0.611	2.11883e-77	Mast_CPA3	UQCR11
IVNS1ABP	7.09542e-82	-1.57995	0.146	0.386	2.33376e-77	Mast_CPA3	IVNS1ABP
KLF4	1.6661e-81	-0.845329	0.152	0.404	5.47998e-77	Mast_CPA3	KLF4
CRLF2	1.69966e-81	0.425609	0.139	0.027	5.59035e-77	Mast_CPA3	CRLF2
SPHK1	1.81874e-81	-0.747038	0.031	0.236	5.98201e-77	Mast_CPA3	SPHK1
NFATC2	1.88796e-81	0.599562	0.206	0.063	6.2097e-77	Mast_CPA3	NFATC2
CD40	2.87407e-81	-0.692549	0.016	0.211	9.45311e-77	Mast_CPA3	CD40
PLTP	3.39047e-81	-1.34662	0.012	0.202	1.11516e-76	Mast_CPA3	PLTP
RPS18	3.79686e-81	0.522603	0.961	0.837	1.24883e-76	Mast_CPA3	RPS18
RPL4	1.41268e-80	0.57186	0.816	0.647	4.64643e-76	Mast_CPA3	RPL4
SLC16A10	1.65502e-80	-0.783486	0.001	0.181	5.44354e-76	Mast_CPA3	SLC16A10
GLTSCR2	1.74914e-80	1.14012	0.201	0.061	5.7531e-76	Mast_CPA3	GLTSCR2
RHBDF2	2.21808e-80	-0.589182	0.02	0.218	7.29547e-76	Mast_CPA3	RHBDF2
RAB33A	3.22134e-80	0.488157	0.15	0.033	1.05953e-75	Mast_CPA3	RAB33A
ANKRD27	5.03711e-80	0.48071	0.149	0.033	1.65676e-75	Mast_CPA3	ANKRD27
ZNF445	8.79399e-80	0.46136	0.151	0.033	2.89243e-75	Mast_CPA3	ZNF445
GBP1	1.41848e-79	-1.04484	0.027	0.225	4.66552e-75	Mast_CPA3	GBP1
APP	3.36131e-79	-0.584608	0.017	0.211	1.10557e-74	Mast_CPA3	APP
LYL1	6.90347e-79	0.723414	0.307	0.135	2.27062e-74	Mast_CPA3	LYL1
ATP13A3	6.96908e-79	-0.941981	0.105	0.334	2.2922e-74	Mast_CPA3	ATP13A3
FGD2	1.24097e-78	-0.519972	0.005	0.187	4.08168e-74	Mast_CPA3	FGD2
PTEN	1.55644e-78	-1.31221	0.157	0.398	5.11929e-74	Mast_CPA3	PTEN
REEP3	2.08674e-78	-0.528451	0.013	0.2	6.8635e-74	Mast_CPA3	REEP3
TPM3	2.45284e-78	-0.763799	0.547	0.716	8.06763e-74	Mast_CPA3	TPM3
IL4I1	3.99228e-78	-0.722729	0.01	0.195	1.3131e-73	Mast_CPA3	IL4I1
H3F3A	5.08908e-78	-0.691861	0.891	0.907	1.67385e-73	Mast_CPA3	H3F3A
PRDM1	6.1126e-78	-0.728333	0.021	0.213	2.0105e-73	Mast_CPA3	PRDM1
MEF2C	6.90627e-78	-0.614016	0.005	0.184	2.27154e-73	Mast_CPA3	MEF2C
HMGN1	1.0338e-77	0.644106	0.609	0.421	3.40027e-73	Mast_CPA3	HMGN1
TTC7B	1.21948e-77	0.516976	0.142	0.031	4.01101e-73	Mast_CPA3	TTC7B
TREM2	1.31939e-77	-0.87375	0.001	0.175	4.33961e-73	Mast_CPA3	TREM2
SECTM1	1.39038e-77	-0.683484	0.005	0.184	4.57311e-73	Mast_CPA3	SECTM1
SERPINB9	1.46269e-77	-1.11167	0.164	0.396	4.81095e-73	Mast_CPA3	SERPINB9
MFSD12	1.58445e-77	-0.534424	0.024	0.218	5.2114e-73	Mast_CPA3	MFSD12
SERPING1	2.10964e-77	-0.794527	0.017	0.205	6.93882e-73	Mast_CPA3	SERPING1
TESC	2.94983e-77	0.598943	0.254	0.093	9.70229e-73	Mast_CPA3	TESC
ENO2	2.98228e-77	0.413934	0.149	0.033	9.80902e-73	Mast_CPA3	ENO2
RPL18A	3.44224e-77	0.425047	0.963	0.829	1.13219e-72	Mast_CPA3	RPL18A
ATP6V0C	4.12036e-77	-0.908697	0.492	0.644	1.35523e-72	Mast_CPA3	ATP6V0C
MSR1	6.42733e-77	-0.614309	0	0.173	2.11401e-72	Mast_CPA3	MSR1
NDUFA4	9.95888e-77	0.663615	0.771	0.602	3.27558e-72	Mast_CPA3	NDUFA4
FCGR1A	1.4639e-76	-0.607738	0.001	0.174	4.81492e-72	Mast_CPA3	FCGR1A
PLGRKT	1.5199e-76	0.751212	0.335	0.164	4.9991e-72	Mast_CPA3	PLGRKT
EHBP1L1	2.89514e-76	-0.662963	0.065	0.28	9.52239e-72	Mast_CPA3	EHBP1L1
FAM49B	2.90319e-76	-1.08053	0.261	0.508	9.54888e-72	Mast_CPA3	FAM49B
PSME2	3.30277e-76	-0.909699	0.402	0.597	1.08631e-71	Mast_CPA3	PSME2
SMAD7	4.4797e-76	0.656682	0.22	0.074	1.47342e-71	Mast_CPA3	SMAD7
RALGAPA1	6.99837e-76	0.465826	0.213	0.068	2.30183e-71	Mast_CPA3	RALGAPA1
SNX29	7.74257e-76	0.735928	0.318	0.146	2.54661e-71	Mast_CPA3	SNX29
IL7R	1.31345e-75	-1.19476	0.035	0.231	4.32005e-71	Mast_CPA3	IL7R
2024-03-01	1.50253e-75	-0.487812	0.003	0.177	4.94198e-71	Mast_CPA3	2024-03-01
CLEC10A	2.5156e-75	-0.816659	0.001	0.172	8.27407e-71	Mast_CPA3	CLEC10A
SUMO2	3.62542e-75	0.543736	0.79	0.621	1.19244e-70	Mast_CPA3	SUMO2
MAP4K5	5.19374e-75	0.589921	0.214	0.073	1.70827e-70	Mast_CPA3	MAP4K5
SLC25A3	6.97349e-75	0.65186	0.724	0.569	2.29365e-70	Mast_CPA3	SLC25A3
ELOB	7.05851e-75	-0.844258	0.46	0.641	2.32162e-70	Mast_CPA3	ELOB
PEA15	7.37551e-75	-0.665553	0.092	0.315	2.42588e-70	Mast_CPA3	PEA15
HNRNPA0	7.49047e-75	0.67483	0.563	0.388	2.46369e-70	Mast_CPA3	HNRNPA0
ATP2B1-AS1	7.63806e-75	-1.06979	0.04	0.235	2.51223e-70	Mast_CPA3	ATP2B1-AS1
EIF5	8.27848e-75	0.680417	0.582	0.411	2.72288e-70	Mast_CPA3	EIF5
RHOQ	1.7729e-74	-0.624186	0.061	0.272	5.83126e-70	Mast_CPA3	RHOQ
RBPJ	2.31569e-74	-0.817013	0.137	0.37	7.61653e-70	Mast_CPA3	RBPJ
PRDX6	2.78333e-74	0.659293	0.589	0.423	9.15466e-70	Mast_CPA3	PRDX6
SDC2	7.61007e-74	-0.67425	0.002	0.17	2.50303e-69	Mast_CPA3	SDC2
GAPDH	1.02523e-73	-0.88725	0.923	0.868	3.37209e-69	Mast_CPA3	GAPDH
NPL	1.23038e-73	-0.671534	0.009	0.183	4.04683e-69	Mast_CPA3	NPL
GNG10	1.28156e-73	-0.816654	0.102	0.326	4.21519e-69	Mast_CPA3	GNG10
DNAJC9	1.31938e-73	0.515226	0.179	0.052	4.33958e-69	Mast_CPA3	DNAJC9
BLOC1S1	5.7374e-73	-0.7131	0.235	0.484	1.88709e-68	Mast_CPA3	BLOC1S1
GRB2	1.01442e-72	-0.826733	0.339	0.57	3.33652e-68	Mast_CPA3	GRB2
CLK1	1.01634e-72	0.637346	0.465	0.273	3.34283e-68	Mast_CPA3	CLK1
PPA1	1.47879e-72	-0.991051	0.111	0.325	4.86389e-68	Mast_CPA3	PPA1
ESYT1	1.69199e-72	0.577692	0.229	0.084	5.56513e-68	Mast_CPA3	ESYT1
SELENOP	2.0946e-72	-2.49734	0.013	0.186	6.88934e-68	Mast_CPA3	SELENOP
EEF1A1P5	4.57192e-72	1.13042	0.458	0.282	1.50375e-67	Mast_CPA3	EEF1A1P5
CIITA	5.28819e-72	-0.525787	0.008	0.179	1.73934e-67	Mast_CPA3	CIITA
ITPR1	5.98005e-72	0.655315	0.263	0.109	1.9669e-67	Mast_CPA3	ITPR1
TOM1	7.58459e-72	-1.08904	0.1	0.315	2.49465e-67	Mast_CPA3	TOM1
LTBR	8.08864e-72	-0.514116	0.025	0.209	2.66044e-67	Mast_CPA3	LTBR
BST2	8.84119e-72	0.687928	0.637	0.458	2.90796e-67	Mast_CPA3	BST2
HLA-DOA	9.11353e-72	-0.461075	0.001	0.164	2.99753e-67	Mast_CPA3	HLA-DOA
USP53	1.16848e-71	0.636274	0.202	0.066	3.84326e-67	Mast_CPA3	USP53
FPR2	1.22482e-71	-1.16213	0.002	0.166	4.02857e-67	Mast_CPA3	FPR2
TRAPPC5	1.25866e-71	-0.639808	0.119	0.347	4.13984e-67	Mast_CPA3	TRAPPC5
ATG3	1.85508e-71	-0.694851	0.141	0.376	6.10154e-67	Mast_CPA3	ATG3
LAMP2	1.99644e-71	-0.649797	0.052	0.252	6.5665e-67	Mast_CPA3	LAMP2
ENTPD1	2.17709e-71	-0.614916	0.012	0.184	7.16068e-67	Mast_CPA3	ENTPD1
C1orf122	2.40678e-71	-0.844374	0.097	0.312	7.91614e-67	Mast_CPA3	C1orf122
ENG	2.60996e-71	-0.549854	0.041	0.236	8.58442e-67	Mast_CPA3	ENG
SAP30	2.81565e-71	-0.917616	0.125	0.342	9.26095e-67	Mast_CPA3	SAP30
SERINC3	3.06182e-71	0.532717	0.38	0.201	1.00706e-66	Mast_CPA3	SERINC3
EPB41L4A-AS1	4.13731e-71	0.580608	0.201	0.066	1.3608e-66	Mast_CPA3	EPB41L4A-AS1
SRGAP2	4.37205e-71	-0.76608	0.031	0.217	1.43801e-66	Mast_CPA3	SRGAP2
ARL6IP5	5.41528e-71	0.660546	0.591	0.416	1.78114e-66	Mast_CPA3	ARL6IP5
TMEM255B	6.35496e-71	0.515401	0.194	0.062	2.09021e-66	Mast_CPA3	TMEM255B
MMP14	9.3422e-71	-0.581011	0.011	0.181	3.07274e-66	Mast_CPA3	MMP14
MORF4L1	1.31341e-70	0.586354	0.658	0.497	4.31994e-66	Mast_CPA3	MORF4L1
FHL3	1.61875e-70	0.57266	0.281	0.12	5.32425e-66	Mast_CPA3	FHL3
RPL23	1.72654e-70	0.84019	0.731	0.584	5.67876e-66	Mast_CPA3	RPL23
CALHM6	2.05004e-70	-0.857331	0.052	0.245	6.74279e-66	Mast_CPA3	CALHM6
TMEM51	2.13048e-70	-0.436164	0.002	0.163	7.00735e-66	Mast_CPA3	TMEM51
TMEM220	2.86506e-70	0.514265	0.178	0.053	9.42347e-66	Mast_CPA3	TMEM220
IL18	3.02502e-70	0.655229	0.426	0.241	9.94959e-66	Mast_CPA3	IL18
SLC39A11	3.18723e-70	0.672689	0.23	0.087	1.04831e-65	Mast_CPA3	SLC39A11
CCL20	7.51874e-70	-2.29517	0.011	0.178	2.47299e-65	Mast_CPA3	CCL20
CTR9	8.68324e-70	0.588976	0.228	0.085	2.856e-65	Mast_CPA3	CTR9
SSR4	1.01132e-69	0.615434	0.745	0.601	3.32633e-65	Mast_CPA3	SSR4
FDXR	1.44663e-69	0.415863	0.105	0.018	4.75811e-65	Mast_CPA3	FDXR
MARCKSL1	2.7151e-69	-1.05506	0.085	0.288	8.93024e-65	Mast_CPA3	MARCKSL1
UNC93B1	2.75493e-69	-0.52322	0.046	0.24	9.06123e-65	Mast_CPA3	UNC93B1
SELENOK	3.27411e-69	0.942214	0.541	0.384	1.07689e-64	Mast_CPA3	SELENOK
TNS3	3.53605e-69	-0.487326	0.007	0.171	1.16304e-64	Mast_CPA3	TNS3
MCOLN1	4.77169e-69	-0.663054	0.04	0.227	1.56946e-64	Mast_CPA3	MCOLN1
PID1	5.16933e-69	-0.724264	0.001	0.158	1.70024e-64	Mast_CPA3	PID1
PIK3AP1	5.54647e-69	-0.712464	0.059	0.257	1.82429e-64	Mast_CPA3	PIK3AP1
HSBP1	8.74415e-69	-0.708962	0.256	0.494	2.87604e-64	Mast_CPA3	HSBP1
GSTM2	1.27529e-68	0.491255	0.154	0.041	4.19455e-64	Mast_CPA3	GSTM2
SCPEP1	1.31757e-68	-0.549396	0.035	0.218	4.33363e-64	Mast_CPA3	SCPEP1
IGF2R	1.77461e-68	-0.848654	0.046	0.235	5.83686e-64	Mast_CPA3	IGF2R
RAB32	1.80851e-68	0.711153	0.493	0.326	5.94837e-64	Mast_CPA3	RAB32
RBM8A	2.17919e-68	0.643271	0.602	0.445	7.16756e-64	Mast_CPA3	RBM8A
PGC	2.48305e-68	0.720203	0.246	0.095	8.16699e-64	Mast_CPA3	PGC
NUDT16	2.59106e-68	-0.734352	0.105	0.319	8.52224e-64	Mast_CPA3	NUDT16
SCIMP	2.91519e-68	-0.433165	0.001	0.156	9.58834e-64	Mast_CPA3	SCIMP
EXOC6B	3.23545e-68	0.421289	0.116	0.023	1.06417e-63	Mast_CPA3	EXOC6B
RPS10	3.47032e-68	0.585853	0.773	0.621	1.14142e-63	Mast_CPA3	RPS10
GLIPR2	6.10723e-68	-0.781221	0.147	0.371	2.00873e-63	Mast_CPA3	GLIPR2
LYN	7.05966e-68	-1.17564	0.259	0.484	2.32199e-63	Mast_CPA3	LYN
PITPNA	9.32177e-68	-0.830307	0.091	0.299	3.06602e-63	Mast_CPA3	PITPNA
CXCL1	9.91464e-68	-2.23015	0.009	0.169	3.26103e-63	Mast_CPA3	CXCL1
HLA-DQA2	1.32623e-67	-0.814777	0.014	0.179	4.3621e-63	Mast_CPA3	HLA-DQA2
ATP5MPL	1.33819e-67	-0.675541	0.194	0.426	4.40143e-63	Mast_CPA3	ATP5MPL
RBMX	1.40043e-67	0.788159	0.419	0.254	4.60615e-63	Mast_CPA3	RBMX
PMEPA1	1.72621e-67	0.524637	0.222	0.08	5.67767e-63	Mast_CPA3	PMEPA1
GAA	1.76597e-67	-0.528611	0.043	0.23	5.80847e-63	Mast_CPA3	GAA
RIN2	1.92463e-67	-0.565465	0.005	0.163	6.3303e-63	Mast_CPA3	RIN2
ITGAX	1.99873e-67	-1.14727	0.167	0.384	6.57404e-63	Mast_CPA3	ITGAX
GPR183	2.01406e-67	-1.31874	0.308	0.503	6.62444e-63	Mast_CPA3	GPR183
VSIR	2.10554e-67	-1.1101	0.195	0.41	6.92534e-63	Mast_CPA3	VSIR
AC015912.3	3.46557e-67	-1.19283	0.012	0.175	1.13986e-62	Mast_CPA3	AC015912.3
MYO1F	3.51135e-67	-0.852481	0.09	0.299	1.15492e-62	Mast_CPA3	MYO1F
TPT1	3.76057e-67	-0.492648	0.961	0.963	1.23689e-62	Mast_CPA3	TPT1
SPCS1	3.91293e-67	0.619595	0.56	0.396	1.287e-62	Mast_CPA3	SPCS1
LUCAT1	4.01844e-67	-1.34012	0.01	0.171	1.3217e-62	Mast_CPA3	LUCAT1
FUOM	8.75884e-67	-0.563875	0.092	0.303	2.88087e-62	Mast_CPA3	FUOM
MIR24-2	1.27545e-66	0.75637	0.138	0.034	4.19508e-62	Mast_CPA3	MIR24-2
PTPRJ	1.73637e-66	-0.678088	0.026	0.2	5.71109e-62	Mast_CPA3	PTPRJ
CLEC5A	2.1731e-66	-0.705087	0	0.151	7.14756e-62	Mast_CPA3	CLEC5A
RNF115	3.41983e-66	0.66793	0.282	0.13	1.12482e-61	Mast_CPA3	RNF115
PIP4K2A	3.77113e-66	0.694464	0.352	0.188	1.24036e-61	Mast_CPA3	PIP4K2A
SEMA6B	5.7012e-66	-0.555219	0.003	0.157	1.87518e-61	Mast_CPA3	SEMA6B
NR3C1	9.74911e-66	0.619097	0.417	0.241	3.20658e-61	Mast_CPA3	NR3C1
BET1L	1.55256e-65	0.567192	0.229	0.089	5.10652e-61	Mast_CPA3	BET1L
YBX3	1.63431e-65	-0.704259	0.182	0.409	5.37541e-61	Mast_CPA3	YBX3
MCEMP1	2.00421e-65	-0.892452	0.001	0.152	6.59204e-61	Mast_CPA3	MCEMP1
RPS26	2.18606e-65	0.569657	0.909	0.803	7.19017e-61	Mast_CPA3	RPS26
IL1R1	2.38059e-65	-0.772153	0.002	0.152	7.83e-61	Mast_CPA3	IL1R1
UMPS	2.51724e-65	0.414861	0.134	0.033	8.27946e-61	Mast_CPA3	UMPS
BCKDK	3.51059e-65	-0.536622	0.061	0.255	1.15467e-60	Mast_CPA3	BCKDK
SNRPN	4.40382e-65	0.593169	0.24	0.098	1.44846e-60	Mast_CPA3	SNRPN
LHFPL2	5.34116e-65	-0.552603	0.022	0.188	1.75676e-60	Mast_CPA3	LHFPL2
CCNG1	5.92385e-65	0.586241	0.254	0.108	1.94841e-60	Mast_CPA3	CCNG1
HDAC4	6.57011e-65	0.517662	0.202	0.07	2.16097e-60	Mast_CPA3	HDAC4
TRIM24	1.28962e-64	0.438928	0.15	0.041	4.24168e-60	Mast_CPA3	TRIM24
FLNA	3.47422e-64	-0.820907	0.214	0.435	1.14271e-59	Mast_CPA3	FLNA
OTUD1	3.72144e-64	-0.582494	0.01	0.166	1.22402e-59	Mast_CPA3	OTUD1
LGALS9	4.05662e-64	-0.702195	0.214	0.432	1.33426e-59	Mast_CPA3	LGALS9
INSIG1	4.76925e-64	-1.1459	0.13	0.327	1.56865e-59	Mast_CPA3	INSIG1
PDIA3	8.4038e-64	0.653294	0.607	0.452	2.7641e-59	Mast_CPA3	PDIA3
SPECC1	1.36339e-63	0.591216	0.227	0.09	4.48432e-59	Mast_CPA3	SPECC1
ATF5	1.66271e-63	-0.549045	0.04	0.217	5.4688e-59	Mast_CPA3	ATF5
G3BP2	1.86504e-63	0.699592	0.36	0.199	6.1343e-59	Mast_CPA3	G3BP2
SELK	2.07656e-63	1.21598	0.191	0.067	6.83e-59	Mast_CPA3	SELK
CUTA	2.16856e-63	0.62636	0.508	0.345	7.13259e-59	Mast_CPA3	CUTA
SCARB2	3.10525e-63	-0.592892	0.061	0.248	1.02135e-58	Mast_CPA3	SCARB2
SUMO3	3.34831e-63	-0.555642	0.126	0.342	1.10129e-58	Mast_CPA3	SUMO3
AC245297.3	3.69874e-63	0.439105	0.135	0.033	1.21655e-58	Mast_CPA3	AC245297.3
NAPSB	3.73066e-63	-0.780028	0.003	0.15	1.22705e-58	Mast_CPA3	NAPSB
SAMD4A	3.98353e-63	0.457496	0.148	0.041	1.31022e-58	Mast_CPA3	SAMD4A
SWAP70	4.12929e-63	0.667298	0.352	0.193	1.35816e-58	Mast_CPA3	SWAP70
HOXB2	6.34608e-63	0.44007	0.149	0.041	2.08729e-58	Mast_CPA3	HOXB2
RCN2	6.45474e-63	0.539826	0.226	0.091	2.12303e-58	Mast_CPA3	RCN2
FNDC3B	8.81321e-63	-1.13645	0.161	0.371	2.89875e-58	Mast_CPA3	FNDC3B
LINC01578	1.01137e-62	0.84309	0.499	0.356	3.3265e-58	Mast_CPA3	LINC01578
COLGALT1	1.02452e-62	-0.469112	0.019	0.181	3.36976e-58	Mast_CPA3	COLGALT1
NFKBID	1.74225e-62	0.766046	0.42	0.255	5.73044e-58	Mast_CPA3	NFKBID
SIGLEC9	1.80457e-62	-0.410599	0.002	0.148	5.9354e-58	Mast_CPA3	SIGLEC9
TP53BP1	1.98217e-62	0.413524	0.151	0.042	6.51957e-58	Mast_CPA3	TP53BP1
DENND3	2.41395e-62	-0.822696	0.041	0.214	7.93972e-58	Mast_CPA3	DENND3
PAG1	3.30839e-62	0.574924	0.368	0.198	1.08816e-57	Mast_CPA3	PAG1
ITGB1	3.60053e-62	-0.610119	0.14	0.357	1.18425e-57	Mast_CPA3	ITGB1
SHTN1	3.80322e-62	-0.421139	0.005	0.151	1.25092e-57	Mast_CPA3	SHTN1
HSP90B1	4.30445e-62	0.647017	0.681	0.532	1.41578e-57	Mast_CPA3	HSP90B1
CNDP2	4.61499e-62	-0.536391	0.092	0.292	1.51792e-57	Mast_CPA3	CNDP2
TSC22D2	4.91064e-62	0.707831	0.29	0.137	1.61516e-57	Mast_CPA3	TSC22D2
SEC14L1	5.6678e-62	-1.03127	0.133	0.34	1.8642e-57	Mast_CPA3	SEC14L1
DHRS7	9.61613e-62	0.550431	0.445	0.279	3.16284e-57	Mast_CPA3	DHRS7
TMX4	1.05408e-61	0.625458	0.269	0.121	3.46697e-57	Mast_CPA3	TMX4
NFATC3	1.28556e-61	0.486606	0.194	0.069	4.22834e-57	Mast_CPA3	NFATC3
UQCR10	1.35759e-61	-0.699961	0.426	0.613	4.46524e-57	Mast_CPA3	UQCR10
MT-ND4L	2.20141e-61	0.691694	0.817	0.714	7.24066e-57	Mast_CPA3	MT-ND4L
SPP1	2.39511e-61	-2.79112	0.002	0.145	7.87775e-57	Mast_CPA3	SPP1
MT-CYB	3.29627e-61	0.462413	0.965	0.861	1.08418e-56	Mast_CPA3	MT-CYB
RPL15	3.72318e-61	0.522157	0.922	0.799	1.22459e-56	Mast_CPA3	RPL15
FAM110A	5.1433e-61	0.637678	0.297	0.143	1.69168e-56	Mast_CPA3	FAM110A
NFATC1	7.50064e-61	0.695293	0.219	0.087	2.46704e-56	Mast_CPA3	NFATC1
SON	7.97551e-61	0.563659	0.628	0.475	2.62323e-56	Mast_CPA3	SON
KLF6	8.1598e-61	0.589649	0.85	0.695	2.68384e-56	Mast_CPA3	KLF6
RGL1	8.51892e-61	-0.484483	0.007	0.153	2.80196e-56	Mast_CPA3	RGL1
RPL37A	1.14129e-60	1.01381	0.874	0.742	3.75381e-56	Mast_CPA3	RPL37A
SLAMF7	1.15482e-60	-0.521659	0.003	0.145	3.79831e-56	Mast_CPA3	SLAMF7
EPSTI1	1.24897e-60	-0.638675	0.093	0.291	4.10799e-56	Mast_CPA3	EPSTI1
ARHGAP26	1.28031e-60	-1.47136	0.096	0.282	4.21105e-56	Mast_CPA3	ARHGAP26
DBNDD2	1.30817e-60	-0.46873	0.043	0.217	4.3027e-56	Mast_CPA3	DBNDD2
STK4	1.43194e-60	0.493848	0.463	0.288	4.7098e-56	Mast_CPA3	STK4
TSPAN33	2.58729e-60	-0.448953	0.003	0.145	8.50986e-56	Mast_CPA3	TSPAN33
VMO1	2.79319e-60	-0.717744	0.02	0.174	9.18708e-56	Mast_CPA3	VMO1
DOK2	8.06579e-60	-0.563556	0.115	0.321	2.65292e-55	Mast_CPA3	DOK2
TFDP2	1.08774e-59	0.484238	0.181	0.062	3.57768e-55	Mast_CPA3	TFDP2
IKZF1	1.25603e-59	0.674002	0.334	0.18	4.1312e-55	Mast_CPA3	IKZF1
RAB5C	1.28179e-59	-0.685021	0.26	0.471	4.21593e-55	Mast_CPA3	RAB5C
GPSM3	2.00817e-59	-0.810063	0.319	0.537	6.60508e-55	Mast_CPA3	GPSM3
SYK	2.12853e-59	-0.583006	0.103	0.302	7.00093e-55	Mast_CPA3	SYK
FOLR2	2.23496e-59	-1.04222	0.007	0.15	7.351e-55	Mast_CPA3	FOLR2
TGM2	2.33545e-59	-0.690458	0.005	0.147	7.68154e-55	Mast_CPA3	TGM2
BCL6	3.42984e-59	-1.08206	0.037	0.201	1.12811e-54	Mast_CPA3	BCL6
SULF2	4.0461e-59	-0.51195	0.009	0.154	1.3308e-54	Mast_CPA3	SULF2
SPN	6.5101e-59	0.582082	0.217	0.088	2.14124e-54	Mast_CPA3	SPN
TLR4	6.79234e-59	-0.660765	0.009	0.152	2.23407e-54	Mast_CPA3	TLR4
RIC1	7.38053e-59	0.644829	0.235	0.1	2.42753e-54	Mast_CPA3	RIC1
GAS6	8.7556e-59	-0.450266	0.011	0.157	2.8798e-54	Mast_CPA3	GAS6
ATP5MD	9.22789e-59	-0.679232	0.319	0.525	3.03514e-54	Mast_CPA3	ATP5MD
RGS16	1.07957e-58	0.54654	0.108	0.023	3.55081e-54	Mast_CPA3	RGS16
PHTF2	1.1004e-58	0.595521	0.217	0.088	3.61932e-54	Mast_CPA3	PHTF2
TMEM167A	1.59196e-58	-0.558026	0.137	0.348	5.23613e-54	Mast_CPA3	TMEM167A
PHTF1	2.00966e-58	0.414827	0.165	0.053	6.60997e-54	Mast_CPA3	PHTF1
PRNP	2.78845e-58	0.590647	0.417	0.25	9.17149e-54	Mast_CPA3	PRNP
APOBEC3A	3.0495e-58	-1.18587	0.002	0.139	1.00301e-53	Mast_CPA3	APOBEC3A
ASGR1	4.27639e-58	-0.413311	0.003	0.14	1.40655e-53	Mast_CPA3	ASGR1
OPN3	4.29207e-58	-0.437243	0.02	0.172	1.4117e-53	Mast_CPA3	OPN3
PLAC8	6.02314e-58	-0.909045	0.012	0.155	1.98107e-53	Mast_CPA3	PLAC8
GNB2L1	8.10837e-58	1.15857	0.235	0.097	2.66692e-53	Mast_CPA3	GNB2L1
GBP2	1.40571e-57	-0.769975	0.076	0.258	4.62351e-53	Mast_CPA3	GBP2
C19orf38	1.53283e-57	-0.48473	0.003	0.138	5.04165e-53	Mast_CPA3	C19orf38
AP1B1	1.71469e-57	-0.525706	0.071	0.252	5.63979e-53	Mast_CPA3	AP1B1
PLEKHF2	1.79242e-57	0.506809	0.228	0.095	5.89546e-53	Mast_CPA3	PLEKHF2
KCNMA1	2.35893e-57	-0.548031	0	0.132	7.75876e-53	Mast_CPA3	KCNMA1
ARPC4	2.42394e-57	-0.60495	0.145	0.353	7.97257e-53	Mast_CPA3	ARPC4
ASAP1	3.17922e-57	-0.65521	0.052	0.222	1.04568e-52	Mast_CPA3	ASAP1
TNFAIP8	3.3215e-57	0.582622	0.42	0.253	1.09248e-52	Mast_CPA3	TNFAIP8
OSM	3.87912e-57	-1.66877	0.061	0.226	1.27588e-52	Mast_CPA3	OSM
DENND4C	4.60681e-57	0.643211	0.268	0.128	1.51523e-52	Mast_CPA3	DENND4C
SFPQ	5.81575e-57	0.709447	0.516	0.373	1.91286e-52	Mast_CPA3	SFPQ
ST13	6.05292e-57	0.588238	0.567	0.426	1.99087e-52	Mast_CPA3	ST13
CCL18	6.29189e-57	-2.49575	0.009	0.147	2.06946e-52	Mast_CPA3	CCL18
F13A1	6.36195e-57	-1.12284	0.001	0.133	2.09251e-52	Mast_CPA3	F13A1
SLC4A2	6.79682e-57	0.468731	0.195	0.073	2.23554e-52	Mast_CPA3	SLC4A2
CASP1	7.8975e-57	-0.638348	0.143	0.347	2.59757e-52	Mast_CPA3	CASP1
HNRNPDL	8.5344e-57	0.558631	0.652	0.505	2.80705e-52	Mast_CPA3	HNRNPDL
SIGLEC1	8.84162e-57	-0.466785	0	0.131	2.9081e-52	Mast_CPA3	SIGLEC1
BCAT1	9.0953e-57	-0.594974	0.059	0.23	2.99154e-52	Mast_CPA3	BCAT1
PDE4DIP	9.48331e-57	-0.548824	0.064	0.24	3.11916e-52	Mast_CPA3	PDE4DIP
SOD1	1.12515e-56	0.569	0.565	0.414	3.70072e-52	Mast_CPA3	SOD1
ARHGAP25	1.29499e-56	0.434218	0.234	0.099	4.25935e-52	Mast_CPA3	ARHGAP25
ANXA11	1.59943e-56	0.469228	0.583	0.435	5.26069e-52	Mast_CPA3	ANXA11
TACC1	2.02439e-56	0.648906	0.461	0.311	6.65843e-52	Mast_CPA3	TACC1
CIAO2A	2.86235e-56	-0.594035	0.141	0.338	9.41454e-52	Mast_CPA3	CIAO2A
RNF213	3.24964e-56	-0.746663	0.215	0.435	1.06884e-51	Mast_CPA3	RNF213
EIF3L	3.54431e-56	0.563029	0.524	0.366	1.16576e-51	Mast_CPA3	EIF3L
PPP1CC	4.09679e-56	0.585399	0.365	0.216	1.34747e-51	Mast_CPA3	PPP1CC
DENND1B	4.20004e-56	0.565469	0.226	0.096	1.38144e-51	Mast_CPA3	DENND1B
CD33	5.69536e-56	0.599467	0.296	0.152	1.87326e-51	Mast_CPA3	CD33
IL1RAP	5.78564e-56	-1.12936	0.026	0.175	1.90296e-51	Mast_CPA3	IL1RAP
SNHG7	5.94906e-56	0.792868	0.345	0.2	1.9567e-51	Mast_CPA3	SNHG7
RAI1	6.74214e-56	0.415608	0.138	0.04	2.21756e-51	Mast_CPA3	RAI1
SELL	9.67161e-56	-1.11865	0.013	0.152	3.18109e-51	Mast_CPA3	SELL
JAK1	1.09031e-55	-0.75457	0.254	0.464	3.58614e-51	Mast_CPA3	JAK1
GNA13	1.40939e-55	-0.7599	0.16	0.357	4.63564e-51	Mast_CPA3	GNA13
NTAN1	1.42263e-55	-0.432843	0.037	0.196	4.67917e-51	Mast_CPA3	NTAN1
PHACTR1	1.54418e-55	-1.14839	0.123	0.312	5.07895e-51	Mast_CPA3	PHACTR1
TXN	1.63003e-55	-1.31062	0.624	0.71	5.36135e-51	Mast_CPA3	TXN
AXL	1.63034e-55	-0.42912	0.002	0.132	5.36234e-51	Mast_CPA3	AXL
PSMA7	1.94086e-55	-0.635056	0.51	0.659	6.38369e-51	Mast_CPA3	PSMA7
GNB4	2.1239e-55	-0.41697	0.028	0.181	6.98572e-51	Mast_CPA3	GNB4
CCR1	2.52899e-55	-0.479146	0.002	0.132	8.31811e-51	Mast_CPA3	CCR1
USP48	2.67007e-55	0.528788	0.239	0.105	8.78214e-51	Mast_CPA3	USP48
RPL23A	2.74792e-55	0.732202	0.852	0.72	9.03818e-51	Mast_CPA3	RPL23A
TNFAIP6	2.84172e-55	-1.2919	0.003	0.133	9.34669e-51	Mast_CPA3	TNFAIP6
TMEM66	4.12729e-55	0.850958	0.187	0.07	1.35751e-50	Mast_CPA3	TMEM66
RANBP2	4.26321e-55	0.802776	0.429	0.271	1.40221e-50	Mast_CPA3	RANBP2
SRP14	6.18156e-55	0.42199	0.843	0.689	2.03318e-50	Mast_CPA3	SRP14
C4orf3	6.3844e-55	-0.776473	0.41	0.607	2.09989e-50	Mast_CPA3	C4orf3
TOMM7	6.99455e-55	0.592207	0.726	0.603	2.30058e-50	Mast_CPA3	TOMM7
DDX24	8.71779e-55	0.619332	0.507	0.355	2.86737e-50	Mast_CPA3	DDX24
CIB1	9.34001e-55	-0.669295	0.322	0.524	3.07202e-50	Mast_CPA3	CIB1
PLXDC2	1.00789e-54	-0.797487	0.134	0.33	3.31506e-50	Mast_CPA3	PLXDC2
TBPL1	1.18994e-54	0.490824	0.177	0.064	3.91382e-50	Mast_CPA3	TBPL1
MERTK	1.63252e-54	-0.482762	0.012	0.149	5.36953e-50	Mast_CPA3	MERTK
CREB3L2	1.87479e-54	0.499086	0.208	0.085	6.16636e-50	Mast_CPA3	CREB3L2
AGFG1	1.90283e-54	-0.622749	0.061	0.228	6.2586e-50	Mast_CPA3	AGFG1
RACK1	3.43171e-54	0.573684	0.712	0.677	1.12872e-49	Mast_CPA3	RACK1
LINC00996	3.74676e-54	0.463657	0.159	0.052	1.23235e-49	Mast_CPA3	LINC00996
USP11	3.86944e-54	0.512282	0.21	0.086	1.2727e-49	Mast_CPA3	USP11
PKM	5.38739e-54	-0.686079	0.504	0.646	1.77197e-49	Mast_CPA3	PKM
RAB10	5.98926e-54	-0.597608	0.184	0.391	1.96993e-49	Mast_CPA3	RAB10
CENPC	7.16351e-54	0.495278	0.18	0.066	2.35615e-49	Mast_CPA3	CENPC
HK3	7.41749e-54	-0.421928	0	0.125	2.43969e-49	Mast_CPA3	HK3
CNBP	7.81119e-54	0.430091	0.67	0.521	2.56918e-49	Mast_CPA3	CNBP
FOSL2	8.65692e-54	0.662083	0.565	0.415	2.84735e-49	Mast_CPA3	FOSL2
KCNAB2	1.11712e-53	-0.471197	0.043	0.204	3.6743e-49	Mast_CPA3	KCNAB2
LPAR6	1.4737e-53	-0.42412	0.015	0.153	4.84715e-49	Mast_CPA3	LPAR6
BABAM2	1.68811e-53	0.547973	0.248	0.115	5.55235e-49	Mast_CPA3	BABAM2
COMMD6	1.76712e-53	0.473025	0.744	0.601	5.81223e-49	Mast_CPA3	COMMD6
SNAI1	1.81115e-53	-0.499203	0.006	0.135	5.95704e-49	Mast_CPA3	SNAI1
MARCO	1.97576e-53	-0.732234	0	0.124	6.49847e-49	Mast_CPA3	MARCO
EDEM2	2.03959e-53	0.520298	0.242	0.113	6.70841e-49	Mast_CPA3	EDEM2
IL4R	2.06461e-53	0.524997	0.344	0.189	6.79072e-49	Mast_CPA3	IL4R
TNFRSF9	2.15963e-53	0.470799	0.132	0.038	7.10325e-49	Mast_CPA3	TNFRSF9
PHF1	3.32616e-53	0.502714	0.202	0.081	1.09401e-48	Mast_CPA3	PHF1
RALB	3.67254e-53	0.419985	0.327	0.176	1.20794e-48	Mast_CPA3	RALB
HSPA5	4.30818e-53	0.617323	0.557	0.4	1.41701e-48	Mast_CPA3	HSPA5
RNASEH2B	4.48365e-53	0.614161	0.296	0.159	1.47472e-48	Mast_CPA3	RNASEH2B
NR1H3	7.10016e-53	-0.591452	0.013	0.146	2.33531e-48	Mast_CPA3	NR1H3
DENND4A	8.37226e-53	0.56594	0.257	0.119	2.75372e-48	Mast_CPA3	DENND4A
PYCARD	8.73474e-53	-0.738298	0.415	0.572	2.87294e-48	Mast_CPA3	PYCARD
ALCAM	1.05923e-52	-0.465743	0.038	0.191	3.48392e-48	Mast_CPA3	ALCAM
SNX10	1.69232e-52	-0.740018	0.195	0.393	5.56621e-48	Mast_CPA3	SNX10
COX7C	2.06439e-52	0.47347	0.793	0.666	6.79e-48	Mast_CPA3	COX7C
MIR3945HG	2.12376e-52	-0.990613	0.002	0.125	6.98526e-48	Mast_CPA3	MIR3945HG
TRIB1	2.32705e-52	-1.06186	0.062	0.222	7.6539e-48	Mast_CPA3	TRIB1
SEC11A	2.37618e-52	0.549536	0.582	0.441	7.81548e-48	Mast_CPA3	SEC11A
DEXI	2.50912e-52	0.417288	0.142	0.044	8.25275e-48	Mast_CPA3	DEXI
CCL4	2.60475e-52	-1.1881	0.197	0.387	8.5673e-48	Mast_CPA3	CCL4
NPM1	2.89307e-52	0.473375	0.739	0.583	9.51561e-48	Mast_CPA3	NPM1
MFSD1	3.70232e-52	-0.643257	0.18	0.372	1.21773e-47	Mast_CPA3	MFSD1
CAMLG	4.02189e-52	0.629029	0.296	0.159	1.32284e-47	Mast_CPA3	CAMLG
EEFSEC	4.59686e-52	0.48364	0.175	0.065	1.51195e-47	Mast_CPA3	EEFSEC
MMP12	5.06545e-52	-2.3789	0.002	0.125	1.66608e-47	Mast_CPA3	MMP12
PDCL	6.76721e-52	0.449851	0.165	0.059	2.2258e-47	Mast_CPA3	PDCL
FXR1	7.20618e-52	0.575367	0.309	0.17	2.37018e-47	Mast_CPA3	FXR1
LIPF	9.19486e-52	0.590081	0.13	0.037	3.02428e-47	Mast_CPA3	LIPF
IL10	1.148e-51	-0.653303	0.001	0.121	3.7759e-47	Mast_CPA3	IL10
LRRC25	1.30618e-51	-0.446416	0.043	0.197	4.29616e-47	Mast_CPA3	LRRC25
SNRPD2	1.82103e-51	0.506796	0.688	0.556	5.98956e-47	Mast_CPA3	SNRPD2
RAB5IF	1.84987e-51	-0.682432	0.142	0.331	6.08439e-47	Mast_CPA3	RAB5IF
NADK	1.9132e-51	-0.670823	0.036	0.183	6.2927e-47	Mast_CPA3	NADK
SNX5	2.14486e-51	0.605393	0.405	0.26	7.05467e-47	Mast_CPA3	SNX5
GMFG	3.55196e-51	-0.740033	0.423	0.616	1.16827e-46	Mast_CPA3	GMFG
OSBPL8	4.15291e-51	0.479265	0.438	0.287	1.36593e-46	Mast_CPA3	OSBPL8
CPM	4.85149e-51	0.841324	0.398	0.257	1.59571e-46	Mast_CPA3	CPM
NT5DC2	4.87544e-51	0.406943	0.164	0.058	1.60358e-46	Mast_CPA3	NT5DC2
SYPL1	5.04822e-51	0.604177	0.3	0.163	1.66041e-46	Mast_CPA3	SYPL1
LAT2	5.37483e-51	0.502603	0.394	0.241	1.76783e-46	Mast_CPA3	LAT2
ABHD5	5.86239e-51	-0.992627	0.054	0.208	1.9282e-46	Mast_CPA3	ABHD5
UTS2	6.06429e-51	0.648078	0.12	0.033	1.9946e-46	Mast_CPA3	UTS2
SUSD1	7.55384e-51	0.462707	0.178	0.067	2.48453e-46	Mast_CPA3	SUSD1
ELMO1	9.62475e-51	0.535526	0.349	0.199	3.16568e-46	Mast_CPA3	ELMO1
CPSF6	1.07442e-50	0.543344	0.243	0.117	3.53387e-46	Mast_CPA3	CPSF6
PGD	1.59379e-50	-0.708103	0.196	0.386	5.24212e-46	Mast_CPA3	PGD
PPIA	1.64707e-50	-0.526654	0.783	0.777	5.41739e-46	Mast_CPA3	PPIA
PELI1	1.69616e-50	-1.50821	0.167	0.341	5.57885e-46	Mast_CPA3	PELI1
ASRGL1	2.70803e-50	0.455008	0.157	0.055	8.90698e-46	Mast_CPA3	ASRGL1
ATP5MF	3.07223e-50	-0.617382	0.361	0.537	1.01049e-45	Mast_CPA3	ATP5MF
DPYD	3.36143e-50	-0.703256	0.1	0.275	1.10561e-45	Mast_CPA3	DPYD
TMOD3	3.59267e-50	0.633842	0.427	0.286	1.18167e-45	Mast_CPA3	TMOD3
IRAK2	3.8051e-50	-0.758128	0.032	0.171	1.25153e-45	Mast_CPA3	IRAK2
ATP5PD	5.4482e-50	-0.601677	0.28	0.477	1.79197e-45	Mast_CPA3	ATP5PD
SNX9	7.21307e-50	-0.566821	0.131	0.315	2.37245e-45	Mast_CPA3	SNX9
MX2	1.09101e-49	-1.09354	0.059	0.213	3.58843e-45	Mast_CPA3	MX2
SETD5	1.16265e-49	0.487932	0.256	0.126	3.82406e-45	Mast_CPA3	SETD5
STAB1	1.86041e-49	-1.03034	0.12	0.287	6.11907e-45	Mast_CPA3	STAB1
PLIN2	2.16854e-49	0.426349	0.663	0.488	7.13255e-45	Mast_CPA3	PLIN2
MAPRE1	3.24928e-49	0.512947	0.412	0.27	1.06872e-44	Mast_CPA3	MAPRE1
VPS13A	3.79339e-49	0.413241	0.13	0.039	1.24768e-44	Mast_CPA3	VPS13A
EIF4EBP1	3.8854e-49	-0.44931	0.108	0.29	1.27795e-44	Mast_CPA3	EIF4EBP1
PRPSAP2	4.1336e-49	0.441194	0.154	0.054	1.35958e-44	Mast_CPA3	PRPSAP2
LRMDA	4.87609e-49	0.839674	0.356	0.219	1.60379e-44	Mast_CPA3	LRMDA
TIPARP	5.95914e-49	0.649978	0.386	0.243	1.96002e-44	Mast_CPA3	TIPARP
SRSF7	8.60003e-49	0.685661	0.476	0.337	2.82864e-44	Mast_CPA3	SRSF7
NAP1L4	1.06297e-48	0.568721	0.277	0.146	3.49621e-44	Mast_CPA3	NAP1L4
SRGAP2B	1.17048e-48	-0.526563	0.01	0.133	3.84984e-44	Mast_CPA3	SRGAP2B
PSMB3	1.42397e-48	-0.603814	0.378	0.569	4.68359e-44	Mast_CPA3	PSMB3
LDHA	1.45556e-48	-0.839639	0.428	0.58	4.7875e-44	Mast_CPA3	LDHA
CARD16	1.64931e-48	-0.725483	0.319	0.521	5.42474e-44	Mast_CPA3	CARD16
RERE	2.33054e-48	0.478899	0.271	0.136	7.66538e-44	Mast_CPA3	RERE
RAB13	2.37356e-48	-0.683267	0.126	0.299	7.80687e-44	Mast_CPA3	RAB13
RETN	2.65563e-48	-0.754225	0	0.112	8.73462e-44	Mast_CPA3	RETN
PCMT1	3.05984e-48	0.555432	0.336	0.201	1.00641e-43	Mast_CPA3	PCMT1
BCAS2	3.17365e-48	0.551486	0.318	0.178	1.04385e-43	Mast_CPA3	BCAS2
MYD88	3.41388e-48	-0.500868	0.067	0.226	1.12286e-43	Mast_CPA3	MYD88
SMS	4.30302e-48	-0.50497	0.13	0.311	1.4153e-43	Mast_CPA3	SMS
ARGLU1	5.30333e-48	0.604098	0.427	0.287	1.74432e-43	Mast_CPA3	ARGLU1
HCST	5.94818e-48	-0.613291	0.341	0.535	1.95641e-43	Mast_CPA3	HCST
HPSE	7.56683e-48	-0.438231	0.001	0.114	2.48881e-43	Mast_CPA3	HPSE
LRRK2	9.61587e-48	-0.707209	0.003	0.118	3.16276e-43	Mast_CPA3	LRRK2
MATR3.1	1.08161e-47	0.576613	0.244	0.12	3.55753e-43	Mast_CPA3	MATR3.1
NAIP	1.1603e-47	-0.430583	0.015	0.14	3.81634e-43	Mast_CPA3	NAIP
2024-09-07	1.45602e-47	0.538582	0.447	0.311	4.789e-43	Mast_CPA3	2024-09-07
INTS6	1.57955e-47	0.52041	0.228	0.105	5.1953e-43	Mast_CPA3	INTS6
FMN1	1.75719e-47	-0.537738	0.047	0.194	5.77957e-43	Mast_CPA3	FMN1
PGLS	1.83533e-47	-0.532875	0.255	0.453	6.03659e-43	Mast_CPA3	PGLS
PNN	2.31231e-47	0.571073	0.302	0.169	7.60543e-43	Mast_CPA3	PNN
TAF10	4.19438e-47	-0.635188	0.36	0.543	1.37958e-42	Mast_CPA3	TAF10
CORO1C	5.76942e-47	-0.44199	0.071	0.23	1.89762e-42	Mast_CPA3	CORO1C
SLC40A1	6.84604e-47	-1.15696	0.061	0.205	2.25173e-42	Mast_CPA3	SLC40A1
RXRA	1.30054e-46	-0.494756	0.016	0.139	4.27762e-42	Mast_CPA3	RXRA
HERC1	1.33877e-46	0.56961	0.239	0.117	4.40336e-42	Mast_CPA3	HERC1
HIST1H4C	1.85718e-46	0.629021	0.401	0.263	6.10844e-42	Mast_CPA3	HIST1H4C
MAF	2.07114e-46	-0.429208	0.022	0.15	6.81218e-42	Mast_CPA3	MAF
PLA2G16	2.08049e-46	0.421494	0.222	0.1	6.84295e-42	Mast_CPA3	PLA2G16
CCNH	2.49208e-46	0.411812	0.467	0.315	8.1967e-42	Mast_CPA3	CCNH
CD84	2.79728e-46	0.588169	0.324	0.19	9.20053e-42	Mast_CPA3	CD84
NECTIN2	2.88294e-46	-0.458142	0.082	0.242	9.48227e-42	Mast_CPA3	NECTIN2
TTYH3	3.03966e-46	-0.439093	0.069	0.223	9.99773e-42	Mast_CPA3	TTYH3
FMNL3	4.95291e-46	0.561495	0.237	0.117	1.62906e-41	Mast_CPA3	FMNL3
AGO3	5.36575e-46	0.443658	0.209	0.093	1.76485e-41	Mast_CPA3	AGO3
LILRB5	6.1089e-46	-0.492997	0.001	0.11	2.00928e-41	Mast_CPA3	LILRB5
PLEC	6.17293e-46	-0.494368	0.087	0.25	2.03034e-41	Mast_CPA3	PLEC
YWHAB	6.18824e-46	-0.566758	0.468	0.624	2.03538e-41	Mast_CPA3	YWHAB
RSL24D1	6.77824e-46	0.604433	0.405	0.275	2.22943e-41	Mast_CPA3	RSL24D1
C9orf72	8.32582e-46	-1.03688	0.085	0.24	2.73844e-41	Mast_CPA3	C9orf72
SRSF5	9.39863e-46	0.612244	0.551	0.426	3.0913e-41	Mast_CPA3	SRSF5
DNPH1	1.21523e-45	-0.516427	0.13	0.303	3.99702e-41	Mast_CPA3	DNPH1
ACER3	1.35586e-45	0.634845	0.284	0.157	4.45955e-41	Mast_CPA3	ACER3
CLTA	1.50807e-45	-0.589159	0.332	0.511	4.96021e-41	Mast_CPA3	CLTA
RNF130	1.62863e-45	0.47633	0.689	0.555	5.35673e-41	Mast_CPA3	RNF130
SLC39A8	1.84779e-45	-0.69876	0.047	0.186	6.07758e-41	Mast_CPA3	SLC39A8
TMEM123	2.20947e-45	-0.487744	0.148	0.331	7.26718e-41	Mast_CPA3	TMEM123
SBDS	3.07277e-45	0.609967	0.338	0.208	1.01067e-40	Mast_CPA3	SBDS
MKNK1	3.23677e-45	-0.570851	0.059	0.207	1.06461e-40	Mast_CPA3	MKNK1
PIK3IP1	4.34122e-45	0.534508	0.208	0.095	1.42787e-40	Mast_CPA3	PIK3IP1
LY6E	5.17793e-45	-0.69779	0.238	0.42	1.70307e-40	Mast_CPA3	LY6E
TRIM22	5.18044e-45	-0.604813	0.075	0.23	1.7039e-40	Mast_CPA3	TRIM22
PSTPIP1	5.44402e-45	-0.427954	0.012	0.128	1.79059e-40	Mast_CPA3	PSTPIP1
TNFSF13	5.77722e-45	-0.462176	0.036	0.17	1.90019e-40	Mast_CPA3	TNFSF13
ABHD12	6.27493e-45	-0.430954	0.08	0.237	2.06389e-40	Mast_CPA3	ABHD12
TXNDC17	6.44797e-45	-0.514686	0.194	0.384	2.1208e-40	Mast_CPA3	TXNDC17
C20orf27	6.48963e-45	-0.420067	0.071	0.224	2.1345e-40	Mast_CPA3	C20orf27
RARRES3	7.12461e-45	0.524641	0.383	0.235	2.34336e-40	Mast_CPA3	RARRES3
DDX3Y	7.66786e-45	0.415894	0.237	0.114	2.52204e-40	Mast_CPA3	DDX3Y
PLD4	9.20225e-45	-0.502888	0.002	0.109	3.02671e-40	Mast_CPA3	PLD4
ARPC3	9.74684e-45	-0.43282	0.81	0.81	3.20583e-40	Mast_CPA3	ARPC3
LSG1	1.54825e-44	0.412498	0.149	0.054	5.09236e-40	Mast_CPA3	LSG1
MYDGF	1.78669e-44	-0.520514	0.146	0.318	5.87661e-40	Mast_CPA3	MYDGF
NBEAL1	1.98221e-44	0.47581	0.212	0.098	6.51967e-40	Mast_CPA3	NBEAL1
FADS3	2.01126e-44	0.46954	0.165	0.065	6.61522e-40	Mast_CPA3	FADS3
HMGA1	2.28676e-44	-0.484144	0.111	0.279	7.52139e-40	Mast_CPA3	HMGA1
CCRL2	2.44548e-44	-0.537699	0.043	0.179	8.04344e-40	Mast_CPA3	CCRL2
ANKRD9	3.34354e-44	0.608116	0.238	0.118	1.09972e-39	Mast_CPA3	ANKRD9
ATP5G2	4.43914e-44	0.716804	0.206	0.089	1.46008e-39	Mast_CPA3	ATP5G2
CXCL5	7.17295e-44	-2.80024	0.001	0.104	2.35925e-39	Mast_CPA3	CXCL5
MAN2A1	8.06041e-44	0.561126	0.218	0.104	2.65115e-39	Mast_CPA3	MAN2A1
RPS27	8.54776e-44	0.732925	0.954	0.853	2.81144e-39	Mast_CPA3	RPS27
CDA	9.37799e-44	-0.840603	0.003	0.108	3.08451e-39	Mast_CPA3	CDA
ZNF706	9.96996e-44	-0.53766	0.339	0.52	3.27922e-39	Mast_CPA3	ZNF706
PNISR	1.07294e-43	0.583243	0.341	0.21	3.52902e-39	Mast_CPA3	PNISR
NANS	1.62e-43	-0.406908	0.123	0.295	5.32835e-39	Mast_CPA3	NANS
VAMP5	2.23178e-43	-0.754598	0.158	0.325	7.34053e-39	Mast_CPA3	VAMP5
HNRNPU	2.41495e-43	0.501055	0.673	0.556	7.94302e-39	Mast_CPA3	HNRNPU
TOP1	2.88029e-43	-0.622594	0.195	0.379	9.47356e-39	Mast_CPA3	TOP1
CD81	4.18719e-43	0.539854	0.671	0.542	1.37721e-38	Mast_CPA3	CD81
ANXA4	5.87136e-43	0.530346	0.353	0.222	1.93115e-38	Mast_CPA3	ANXA4
CYP27A1	6.05014e-43	-0.46916	0.001	0.103	1.98995e-38	Mast_CPA3	CYP27A1
ADAMDEC1	6.27505e-43	-0.480975	0.002	0.104	2.06393e-38	Mast_CPA3	ADAMDEC1
ASPH	7.00816e-43	-0.575461	0.048	0.184	2.30505e-38	Mast_CPA3	ASPH
EXOSC8	8.65666e-43	0.460696	0.192	0.086	2.84726e-38	Mast_CPA3	EXOSC8
SDC4	8.78303e-43	-0.407052	0.022	0.142	2.88883e-38	Mast_CPA3	SDC4
DRAP1	8.8186e-43	0.474745	0.624	0.505	2.90052e-38	Mast_CPA3	DRAP1
DAPP1	1.11187e-42	-0.482897	0.012	0.122	3.65706e-38	Mast_CPA3	DAPP1
CAPZB	1.20423e-42	-0.605179	0.511	0.642	3.96082e-38	Mast_CPA3	CAPZB
MMP24OS	1.37913e-42	-0.549627	0.179	0.359	4.5361e-38	Mast_CPA3	MMP24OS
LRRC75A-AS1	1.60056e-42	0.655405	0.569	0.469	5.2644e-38	Mast_CPA3	LRRC75A-AS1
MPHOSPH8	2.10258e-42	0.54194	0.339	0.211	6.9156e-38	Mast_CPA3	MPHOSPH8
DNASE1L3	2.55531e-42	-1.01982	0.002	0.102	8.40467e-38	Mast_CPA3	DNASE1L3
RASSF1	2.93798e-42	0.523593	0.229	0.115	9.66331e-38	Mast_CPA3	RASSF1
RCAN1	3.1574e-42	-0.448124	0.02	0.136	1.0385e-37	Mast_CPA3	RCAN1
ZEB2	3.3614e-42	0.466337	0.631	0.512	1.1056e-37	Mast_CPA3	ZEB2
ANAPC11	3.72249e-42	-0.546493	0.335	0.512	1.22436e-37	Mast_CPA3	ANAPC11
RNF13	4.05327e-42	-0.600105	0.152	0.326	1.33316e-37	Mast_CPA3	RNF13
FKBP1A	5.82798e-42	-0.601311	0.387	0.559	1.91688e-37	Mast_CPA3	FKBP1A
VAV3	5.8895e-42	0.51238	0.233	0.115	1.93712e-37	Mast_CPA3	VAV3
TMCC3	6.44817e-42	-0.639395	0.015	0.127	2.12087e-37	Mast_CPA3	TMCC3
CISD3	1.06727e-41	-0.465995	0.131	0.298	3.51034e-37	Mast_CPA3	CISD3
ZC3H12A	1.218e-41	0.91284	0.342	0.217	4.00611e-37	Mast_CPA3	ZC3H12A
TNRC6B	1.29651e-41	0.416433	0.267	0.142	4.26435e-37	Mast_CPA3	TNRC6B
SH3BP2	1.64917e-41	-0.463902	0.078	0.225	5.42429e-37	Mast_CPA3	SH3BP2
S100B	1.76666e-41	-0.777786	0.004	0.105	5.81073e-37	Mast_CPA3	S100B
RNH1	1.80339e-41	-0.520659	0.321	0.49	5.93154e-37	Mast_CPA3	RNH1
POMP	2.00681e-41	-0.558385	0.495	0.635	6.6006e-37	Mast_CPA3	POMP
AMPD2	2.03697e-41	-0.630346	0.06	0.197	6.6998e-37	Mast_CPA3	AMPD2
SLCO2B1	2.07388e-41	-0.52482	0.065	0.205	6.82121e-37	Mast_CPA3	SLCO2B1
LPP	2.79547e-41	-0.736249	0.079	0.225	9.19456e-37	Mast_CPA3	LPP
GPX1	3.07966e-41	-0.74409	0.418	0.592	1.01293e-36	Mast_CPA3	GPX1
EIF3D	3.15482e-41	0.536851	0.433	0.311	1.03765e-36	Mast_CPA3	EIF3D
CCDC85B	3.61718e-41	0.52159	0.383	0.252	1.18973e-36	Mast_CPA3	CCDC85B
HM13	4.64048e-41	-0.485623	0.173	0.346	1.5263e-36	Mast_CPA3	HM13
SOX4	4.88762e-41	0.51121	0.238	0.119	1.60759e-36	Mast_CPA3	SOX4
GGTA1P	5.89666e-41	-0.589399	0.062	0.198	1.93947e-36	Mast_CPA3	GGTA1P
ATP5D	6.37721e-41	0.457557	0.138	0.049	2.09753e-36	Mast_CPA3	ATP5D
NKTR	6.63013e-41	0.522651	0.25	0.133	2.18072e-36	Mast_CPA3	NKTR
KHDRBS1	8.03398e-41	0.516882	0.48	0.36	2.64246e-36	Mast_CPA3	KHDRBS1
TERF2IP	8.67418e-41	0.478459	0.366	0.238	2.85303e-36	Mast_CPA3	TERF2IP
PCM1	9.03677e-41	0.568463	0.318	0.193	2.97228e-36	Mast_CPA3	PCM1
TRA2B	9.26599e-41	0.566998	0.479	0.357	3.04768e-36	Mast_CPA3	TRA2B
TRAF5	9.90549e-41	0.425111	0.138	0.05	3.25801e-36	Mast_CPA3	TRAF5
ELOC	1.06694e-40	-0.519693	0.186	0.364	3.50927e-36	Mast_CPA3	ELOC
CDKN2AIP	1.16897e-40	0.405468	0.135	0.048	3.84486e-36	Mast_CPA3	CDKN2AIP
KIDINS220	1.70667e-40	0.443173	0.205	0.097	5.6134e-36	Mast_CPA3	KIDINS220
TRIO	2.221e-40	0.532927	0.221	0.109	7.3051e-36	Mast_CPA3	TRIO
GTF2B	2.77822e-40	0.592462	0.318	0.195	9.13784e-36	Mast_CPA3	GTF2B
MGLL	3.40481e-40	-0.450742	0.039	0.163	1.11988e-35	Mast_CPA3	MGLL
XPO6	3.93654e-40	-0.999202	0.041	0.165	1.29477e-35	Mast_CPA3	XPO6
FAM129A	3.99083e-40	-0.744158	0.04	0.164	1.31262e-35	Mast_CPA3	FAM129A
ATXN10	4.65176e-40	0.505181	0.252	0.138	1.53001e-35	Mast_CPA3	ATXN10
PPP4C	4.67162e-40	-0.509211	0.246	0.435	1.53654e-35	Mast_CPA3	PPP4C
EMP1	4.74427e-40	-0.465052	0.01	0.113	1.56044e-35	Mast_CPA3	EMP1
VOPP1	5.81822e-40	-0.468334	0.112	0.268	1.91367e-35	Mast_CPA3	VOPP1
HNRNPL	6.08706e-40	0.555335	0.421	0.299	2.0021e-35	Mast_CPA3	HNRNPL
ATP6V1C1	6.60485e-40	-0.456109	0.1	0.254	2.1724e-35	Mast_CPA3	ATP6V1C1
SPINT2	6.77415e-40	0.434467	0.474	0.335	2.22809e-35	Mast_CPA3	SPINT2
MUM1	7.01247e-40	0.409927	0.154	0.062	2.30647e-35	Mast_CPA3	MUM1
COPS9	8.0916e-40	-0.473184	0.18	0.355	2.66141e-35	Mast_CPA3	COPS9
POLR3GL	8.22069e-40	0.493599	0.277	0.16	2.70387e-35	Mast_CPA3	POLR3GL
WARS	8.4629e-40	-0.625963	0.123	0.278	2.78353e-35	Mast_CPA3	WARS
ESYT2	1.10112e-39	0.506874	0.283	0.162	3.62168e-35	Mast_CPA3	ESYT2
TWF2	1.24007e-39	-0.433006	0.186	0.364	4.07871e-35	Mast_CPA3	TWF2
NORAD	1.30775e-39	0.596144	0.261	0.145	4.30132e-35	Mast_CPA3	NORAD
VPS28	1.73892e-39	0.484616	0.558	0.442	5.71949e-35	Mast_CPA3	VPS28
NUTM2B-AS1	1.96157e-39	0.507375	0.202	0.096	6.45179e-35	Mast_CPA3	NUTM2B-AS1
RFX2	2.315e-39	0.42844	0.176	0.075	7.61426e-35	Mast_CPA3	RFX2
BPTF	2.47586e-39	0.547748	0.304	0.185	8.14336e-35	Mast_CPA3	BPTF
QSOX1	2.59105e-39	-0.462473	0.085	0.231	8.52222e-35	Mast_CPA3	QSOX1
OAS1	2.7303e-39	-0.40994	0.028	0.144	8.98022e-35	Mast_CPA3	OAS1
DIRC2	2.75821e-39	-0.467286	0.013	0.117	9.07204e-35	Mast_CPA3	DIRC2
MGST3	2.99834e-39	-0.513205	0.228	0.402	9.86182e-35	Mast_CPA3	MGST3
SLA	3.37493e-39	-0.896081	0.198	0.367	1.11005e-34	Mast_CPA3	SLA
TES	3.46819e-39	-0.444323	0.094	0.243	1.14072e-34	Mast_CPA3	TES
ACTR2	3.90141e-39	-0.522221	0.335	0.518	1.28321e-34	Mast_CPA3	ACTR2
FLT1	4.06762e-39	-0.603142	0.004	0.1	1.33788e-34	Mast_CPA3	FLT1
NOP53	6.62818e-39	0.603339	0.407	0.289	2.18007e-34	Mast_CPA3	NOP53
IRF7	7.3688e-39	-0.586545	0.109	0.262	2.42367e-34	Mast_CPA3	IRF7
B3GNT5	1.0909e-38	-0.624533	0.079	0.218	3.58809e-34	Mast_CPA3	B3GNT5
ATP5ME	1.10592e-38	-0.547314	0.25	0.429	3.63748e-34	Mast_CPA3	ATP5ME
PMPCB	1.27708e-38	0.465832	0.235	0.125	4.20044e-34	Mast_CPA3	PMPCB
RAPGEF1	1.48428e-38	-0.569643	0.13	0.289	4.88193e-34	Mast_CPA3	RAPGEF1
HNRNPK	1.52418e-38	0.414848	0.635	0.521	5.01318e-34	Mast_CPA3	HNRNPK
LSM2	1.52909e-38	0.55795	0.342	0.221	5.02933e-34	Mast_CPA3	LSM2
LTA4H	2.00685e-38	-0.429275	0.081	0.222	6.60074e-34	Mast_CPA3	LTA4H
CYTOR	2.05851e-38	-0.617394	0.104	0.251	6.77064e-34	Mast_CPA3	CYTOR
AGPS	2.10731e-38	0.446505	0.174	0.077	6.93117e-34	Mast_CPA3	AGPS
KLHL6	2.16708e-38	0.521518	0.265	0.148	7.12775e-34	Mast_CPA3	KLHL6
ATP6V0D1	2.83498e-38	-0.578604	0.304	0.48	9.32455e-34	Mast_CPA3	ATP6V0D1
SH3BGRL3	3.72398e-38	-0.492018	0.931	0.882	1.22485e-33	Mast_CPA3	SH3BGRL3
ZFYVE16	4.07086e-38	-0.42649	0.045	0.169	1.33895e-33	Mast_CPA3	ZFYVE16
GPR137B	4.24204e-38	-0.471868	0.107	0.254	1.39525e-33	Mast_CPA3	GPR137B
COX6B1	4.43826e-38	-0.464894	0.676	0.745	1.45979e-33	Mast_CPA3	COX6B1
METRNL	5.76769e-38	-0.730432	0.416	0.563	1.89705e-33	Mast_CPA3	METRNL
HIPK1	7.95782e-38	0.460972	0.225	0.116	2.61741e-33	Mast_CPA3	HIPK1
PURA	8.62018e-38	0.482104	0.221	0.115	2.83526e-33	Mast_CPA3	PURA
RPL41	8.62341e-38	0.779724	0.94	0.845	2.83633e-33	Mast_CPA3	RPL41
N4BP1	9.83261e-38	-0.739583	0.059	0.186	3.23404e-33	Mast_CPA3	N4BP1
HERPUD1	1.00176e-37	-0.750248	0.335	0.489	3.29489e-33	Mast_CPA3	HERPUD1
GBP5	1.02768e-37	-0.615545	0.02	0.126	3.38014e-33	Mast_CPA3	GBP5
DNAJC1	1.10715e-37	0.534311	0.312	0.194	3.64154e-33	Mast_CPA3	DNAJC1
CHKA	1.18744e-37	0.465265	0.243	0.13	3.90563e-33	Mast_CPA3	CHKA
ZFAND1	1.37221e-37	0.430274	0.164	0.071	4.51332e-33	Mast_CPA3	ZFAND1
PLEKHB2	1.54305e-37	-0.542418	0.179	0.343	5.07524e-33	Mast_CPA3	PLEKHB2
LGALS8	1.81057e-37	0.428471	0.217	0.111	5.95513e-33	Mast_CPA3	LGALS8
IL3RA	1.91631e-37	-0.51237	0.04	0.156	6.30293e-33	Mast_CPA3	IL3RA
PRKAR1A	2.57062e-37	0.433868	0.485	0.361	8.45502e-33	Mast_CPA3	PRKAR1A
SSH2	3.27026e-37	-0.847248	0.133	0.283	1.07562e-32	Mast_CPA3	SSH2
YWHAQ	4.15437e-37	0.453354	0.43	0.311	1.36641e-32	Mast_CPA3	YWHAQ
ATP5L	6.18142e-37	0.500989	0.206	0.093	2.03313e-32	Mast_CPA3	ATP5L
GABARAPL1	6.35252e-37	-0.575706	0.11	0.254	2.08941e-32	Mast_CPA3	GABARAPL1
TPD52L2	6.54001e-37	-0.495433	0.077	0.214	2.15107e-32	Mast_CPA3	TPD52L2
ABHD14B	7.10255e-37	0.449489	0.22	0.115	2.3361e-32	Mast_CPA3	ABHD14B
JOSD2	7.4418e-37	-0.420345	0.126	0.28	2.44768e-32	Mast_CPA3	JOSD2
N4BP2L2	8.23838e-37	0.534504	0.349	0.229	2.70968e-32	Mast_CPA3	N4BP2L2
SSR2	9.83459e-37	0.449511	0.566	0.448	3.23469e-32	Mast_CPA3	SSR2
BNIP3	1.11016e-36	-0.453165	0.01	0.105	3.65143e-32	Mast_CPA3	BNIP3
RBBP8	1.19398e-36	0.485488	0.16	0.069	3.92712e-32	Mast_CPA3	RBBP8
LGALS3	1.31955e-36	-0.839853	0.584	0.659	4.34014e-32	Mast_CPA3	LGALS3
NUPR1	1.35744e-36	-0.627468	0.007	0.1	4.46474e-32	Mast_CPA3	NUPR1
DRAM1	1.51226e-36	-0.420158	0.061	0.189	4.97399e-32	Mast_CPA3	DRAM1
TPP1	1.70492e-36	-0.41373	0.188	0.36	5.60766e-32	Mast_CPA3	TPP1
PARP14	2.27338e-36	-0.473308	0.058	0.183	7.47737e-32	Mast_CPA3	PARP14
DDAH2	2.39985e-36	0.540658	0.397	0.281	7.89336e-32	Mast_CPA3	DDAH2
CLEC2B	3.34085e-36	-0.614043	0.161	0.323	1.09884e-31	Mast_CPA3	CLEC2B
SPAG9	3.5685e-36	-0.836809	0.199	0.359	1.17372e-31	Mast_CPA3	SPAG9
CLNS1A	3.59817e-36	0.521362	0.345	0.232	1.18347e-31	Mast_CPA3	CLNS1A
DUSP4	3.66885e-36	-0.501857	0.043	0.159	1.20672e-31	Mast_CPA3	DUSP4
GPCPD1	4.72391e-36	-0.660495	0.162	0.314	1.55374e-31	Mast_CPA3	GPCPD1
TMEM176A	4.91398e-36	-0.788008	0.26	0.4	1.61626e-31	Mast_CPA3	TMEM176A
A2M	7.06623e-36	-0.664	0.074	0.2	2.32415e-31	Mast_CPA3	A2M
COX7B	8.98889e-36	-0.483804	0.409	0.572	2.95654e-31	Mast_CPA3	COX7B
PDCD5	9.37559e-36	-0.417988	0.153	0.314	3.08372e-31	Mast_CPA3	PDCD5
RPL13A	9.56688e-36	1.00537	0.737	0.652	3.14664e-31	Mast_CPA3	RPL13A
MYO1G	9.70381e-36	-0.485131	0.121	0.264	3.19168e-31	Mast_CPA3	MYO1G
DENND5A	1.11244e-35	-0.839315	0.101	0.235	3.65894e-31	Mast_CPA3	DENND5A
MAPK6	1.28214e-35	0.500039	0.26	0.149	4.2171e-31	Mast_CPA3	MAPK6
TAF1D	1.86671e-35	0.574988	0.387	0.274	6.1398e-31	Mast_CPA3	TAF1D
NUDT14	2.37574e-35	0.544874	0.266	0.157	7.81404e-31	Mast_CPA3	NUDT14
TPM4	2.38434e-35	-0.643989	0.512	0.65	7.84234e-31	Mast_CPA3	TPM4
RPL21	3.0653e-35	0.864986	0.85	0.75	1.00821e-30	Mast_CPA3	RPL21
DMXL2	3.08069e-35	-0.464393	0.104	0.244	1.01327e-30	Mast_CPA3	DMXL2
FBRS	3.15157e-35	0.450429	0.209	0.107	1.03658e-30	Mast_CPA3	FBRS
HEXIM1	3.36706e-35	0.49334	0.169	0.076	1.10746e-30	Mast_CPA3	HEXIM1
PEF1	3.40374e-35	0.422155	0.216	0.113	1.11952e-30	Mast_CPA3	PEF1
MYO15B	3.43765e-35	0.43821	0.176	0.081	1.13068e-30	Mast_CPA3	MYO15B
SBNO2	3.58835e-35	-0.47546	0.032	0.14	1.18025e-30	Mast_CPA3	SBNO2
MX1	3.60261e-35	-0.541099	0.064	0.19	1.18493e-30	Mast_CPA3	MX1
ARHGDIA	3.89894e-35	-0.495711	0.326	0.5	1.2824e-30	Mast_CPA3	ARHGDIA
FTX	4.59937e-35	0.411872	0.157	0.067	1.51278e-30	Mast_CPA3	FTX
SRI	6.22664e-35	0.481112	0.435	0.32	2.04801e-30	Mast_CPA3	SRI
PPP1CA	8.21159e-35	-0.417761	0.308	0.48	2.70087e-30	Mast_CPA3	PPP1CA
IL17RA	8.48916e-35	-0.424826	0.053	0.174	2.79217e-30	Mast_CPA3	IL17RA
RNF19B	9.89907e-35	-0.75257	0.086	0.215	3.2559e-30	Mast_CPA3	RNF19B
GUK1	1.58442e-34	-0.527183	0.484	0.62	5.21131e-30	Mast_CPA3	GUK1
ID3	1.63793e-34	-0.51523	0.035	0.144	5.38733e-30	Mast_CPA3	ID3
NR4A3	2.29032e-34	0.520929	0.433	0.303	7.5331e-30	Mast_CPA3	NR4A3
HIVEP2	2.9598e-34	-0.484409	0.022	0.123	9.73507e-30	Mast_CPA3	HIVEP2
ANXA7	3.23009e-34	0.472558	0.371	0.258	1.06241e-29	Mast_CPA3	ANXA7
MIER1	3.3351e-34	0.41591	0.278	0.164	1.09695e-29	Mast_CPA3	MIER1
RBM38	4.0467e-34	0.434264	0.174	0.082	1.331e-29	Mast_CPA3	RBM38
B4GALT1	7.0959e-34	-0.514111	0.148	0.299	2.33391e-29	Mast_CPA3	B4GALT1
POLR2L	7.47357e-34	-0.518075	0.433	0.578	2.45813e-29	Mast_CPA3	POLR2L
RAB1A	1.17073e-33	-0.643627	0.206	0.37	3.85066e-29	Mast_CPA3	RAB1A
C19orf43	1.30533e-33	0.523677	0.162	0.072	4.29336e-29	Mast_CPA3	C19orf43
MIR155HG	1.33625e-33	-0.598391	0.031	0.134	4.39505e-29	Mast_CPA3	MIR155HG
APBB1IP	1.42127e-33	-0.574734	0.123	0.266	4.6747e-29	Mast_CPA3	APBB1IP
TKT	1.94509e-33	-0.627724	0.311	0.469	6.39761e-29	Mast_CPA3	TKT
GRAMD1A	1.98677e-33	-0.595977	0.106	0.241	6.53468e-29	Mast_CPA3	GRAMD1A
SLC7A5	1.99936e-33	0.604156	0.292	0.176	6.57611e-29	Mast_CPA3	SLC7A5
RNF181	2.22067e-33	-0.463781	0.307	0.473	7.304e-29	Mast_CPA3	RNF181
PLEKHO2	2.22247e-33	-0.418385	0.029	0.132	7.30993e-29	Mast_CPA3	PLEKHO2
MAP1LC3B	2.88004e-33	-0.719881	0.359	0.523	9.47276e-29	Mast_CPA3	MAP1LC3B
DBNL	3.0906e-33	-0.435836	0.183	0.34	1.01653e-28	Mast_CPA3	DBNL
ZC3HAV1	3.74726e-33	0.496136	0.303	0.186	1.23251e-28	Mast_CPA3	ZC3HAV1
PTMS	3.77735e-33	-0.540841	0.211	0.364	1.24241e-28	Mast_CPA3	PTMS
HSD17B4	3.80411e-33	0.445681	0.275	0.168	1.25121e-28	Mast_CPA3	HSD17B4
HSPA6	4.17018e-33	-0.631541	0.058	0.177	1.37161e-28	Mast_CPA3	HSPA6
CNIH4	7.53985e-33	-0.406557	0.122	0.264	2.47993e-28	Mast_CPA3	CNIH4
AZI2	7.78957e-33	-0.407188	0.071	0.194	2.56207e-28	Mast_CPA3	AZI2
TSEN34	9.59535e-33	-0.56736	0.106	0.244	3.15601e-28	Mast_CPA3	TSEN34
RASSF3	1.1309e-32	-0.488667	0.047	0.158	3.71963e-28	Mast_CPA3	RASSF3
CSDE1	1.42141e-32	0.436643	0.491	0.39	4.67516e-28	Mast_CPA3	CSDE1
AP2M1	1.56304e-32	0.423951	0.516	0.412	5.14099e-28	Mast_CPA3	AP2M1
PYGL	2.25658e-32	-0.500124	0.04	0.147	7.42212e-28	Mast_CPA3	PYGL
IQSEC1	2.66197e-32	-0.507261	0.036	0.14	8.75548e-28	Mast_CPA3	IQSEC1
PHF3	3.04213e-32	0.432994	0.265	0.16	1.00059e-27	Mast_CPA3	PHF3
COMT	3.48942e-32	-0.466383	0.259	0.413	1.1477e-27	Mast_CPA3	COMT
DNAJB9	3.76508e-32	0.50848	0.231	0.129	1.23837e-27	Mast_CPA3	DNAJB9
BAG3	5.47186e-32	-0.740249	0.051	0.161	1.79975e-27	Mast_CPA3	BAG3
RPL36A	8.667e-32	0.739371	0.661	0.578	2.85066e-27	Mast_CPA3	RPL36A
WWOX	1.14453e-31	0.496622	0.118	0.045	3.76447e-27	Mast_CPA3	WWOX
EIF3F	1.55544e-31	0.406984	0.552	0.449	5.11598e-27	Mast_CPA3	EIF3F
EID1	2.01869e-31	0.459998	0.493	0.391	6.63968e-27	Mast_CPA3	EID1
NUP214	2.28761e-31	-0.480015	0.078	0.2	7.52418e-27	Mast_CPA3	NUP214
ENO1	2.85252e-31	-0.52152	0.563	0.65	9.38223e-27	Mast_CPA3	ENO1
NDRG1	2.92517e-31	-0.491212	0.055	0.165	9.62117e-27	Mast_CPA3	NDRG1
TFF2	3.27226e-31	0.472478	0.168	0.077	1.07628e-26	Mast_CPA3	TFF2
FUNDC2	3.66892e-31	0.50551	0.356	0.253	1.20674e-26	Mast_CPA3	FUNDC2
SESN2	3.89373e-31	-0.411581	0.017	0.105	1.28069e-26	Mast_CPA3	SESN2
MSRB1	3.96332e-31	-0.51676	0.032	0.131	1.30358e-26	Mast_CPA3	MSRB1
RSRC2	4.01089e-31	0.519818	0.332	0.228	1.31922e-26	Mast_CPA3	RSRC2
PHIP	4.27336e-31	0.431956	0.271	0.166	1.40555e-26	Mast_CPA3	PHIP
RGS18	4.50941e-31	-0.450579	0.018	0.107	1.48319e-26	Mast_CPA3	RGS18
HAX1	4.63846e-31	0.519193	0.339	0.237	1.52564e-26	Mast_CPA3	HAX1
PARP1	4.80017e-31	0.476878	0.296	0.191	1.57883e-26	Mast_CPA3	PARP1
RAD21	5.04141e-31	0.469104	0.328	0.221	1.65817e-26	Mast_CPA3	RAD21
LUC7L3	5.99924e-31	0.48239	0.267	0.163	1.97321e-26	Mast_CPA3	LUC7L3
CRIP1	6.19891e-31	-1.31269	0.457	0.553	2.03888e-26	Mast_CPA3	CRIP1
BZW1	6.26116e-31	0.43142	0.452	0.345	2.05936e-26	Mast_CPA3	BZW1
ECH1	1.05594e-30	0.488529	0.399	0.3	3.47309e-26	Mast_CPA3	ECH1
WTAP	1.30962e-30	-0.77101	0.31	0.456	4.30746e-26	Mast_CPA3	WTAP
C9orf16	1.36412e-30	0.433218	0.526	0.426	4.48674e-26	Mast_CPA3	C9orf16
GADD45B	1.6715e-30	0.541067	0.639	0.538	5.49772e-26	Mast_CPA3	GADD45B
BTG3	2.40125e-30	0.44256	0.279	0.173	7.89795e-26	Mast_CPA3	BTG3
RB1	2.76599e-30	-0.456256	0.141	0.281	9.09761e-26	Mast_CPA3	RB1
CAMK1D	4.04019e-30	-1.07182	0.085	0.203	1.32886e-25	Mast_CPA3	CAMK1D
ANXA6	4.37329e-30	0.415165	0.329	0.217	1.43842e-25	Mast_CPA3	ANXA6
FP236383.1	4.97964e-30	-2.2267	0.213	0.311	1.63785e-25	Mast_CPA3	FP236383.1
GRK2	5.47226e-30	0.498308	0.32	0.216	1.79988e-25	Mast_CPA3	GRK2
RSRP1	5.92284e-30	0.442694	0.361	0.25	1.94808e-25	Mast_CPA3	RSRP1
PTPRC	6.03408e-30	-0.678795	0.352	0.503	1.98467e-25	Mast_CPA3	PTPRC
COX8A	6.92306e-30	-0.437102	0.612	0.685	2.27706e-25	Mast_CPA3	COX8A
CXCL16	1.05374e-29	-0.620488	0.359	0.491	3.46584e-25	Mast_CPA3	CXCL16
PARVB	1.58057e-29	0.464415	0.427	0.323	5.19864e-25	Mast_CPA3	PARVB
MBD4	1.78853e-29	0.466794	0.265	0.166	5.88266e-25	Mast_CPA3	MBD4
ALG13	1.87777e-29	0.531431	0.238	0.143	6.17618e-25	Mast_CPA3	ALG13
C3AR1	1.88685e-29	-0.461036	0.115	0.244	6.20605e-25	Mast_CPA3	C3AR1
ISG15	2.58088e-29	-0.972652	0.247	0.387	8.48877e-25	Mast_CPA3	ISG15
SYF2	4.8406e-29	0.463884	0.393	0.292	1.59212e-24	Mast_CPA3	SYF2
LIPA	4.93808e-29	-0.777059	0.145	0.266	1.62418e-24	Mast_CPA3	LIPA
NSMCE3	5.31853e-29	0.407636	0.166	0.082	1.74932e-24	Mast_CPA3	NSMCE3
RABGGTA	7.66366e-29	0.422343	0.15	0.072	2.52065e-24	Mast_CPA3	RABGGTA
PLEKHA2	8.57642e-29	0.454223	0.243	0.145	2.82087e-24	Mast_CPA3	PLEKHA2
PCBP1	1.156e-28	-0.475733	0.445	0.576	3.80221e-24	Mast_CPA3	PCBP1
PMAIP1	1.36776e-28	-0.496207	0.053	0.154	4.4987e-24	Mast_CPA3	PMAIP1
ERGIC1	2.44182e-28	-0.60246	0.164	0.299	8.03137e-24	Mast_CPA3	ERGIC1
CBX3	3.43617e-28	0.42093	0.435	0.334	1.13019e-23	Mast_CPA3	CBX3
ATRX	3.61165e-28	0.440336	0.277	0.178	1.18791e-23	Mast_CPA3	ATRX
EIF2S3	4.2622e-28	0.408587	0.334	0.232	1.40188e-23	Mast_CPA3	EIF2S3
UBE2R2	4.32546e-28	-0.432742	0.112	0.239	1.42269e-23	Mast_CPA3	UBE2R2
WDR1	5.13777e-28	-0.467709	0.281	0.432	1.68986e-23	Mast_CPA3	WDR1
KIAA1551	5.21281e-28	-0.767922	0.072	0.181	1.71454e-23	Mast_CPA3	KIAA1551
LCP1	6.03534e-28	-0.643287	0.505	0.649	1.98508e-23	Mast_CPA3	LCP1
EIF2AK1	6.70358e-28	0.443883	0.222	0.131	2.20487e-23	Mast_CPA3	EIF2AK1
IFI6	1.00329e-27	-0.412607	0.225	0.37	3.29993e-23	Mast_CPA3	IFI6
CASP4	1.1264e-27	-0.559909	0.159	0.295	3.70485e-23	Mast_CPA3	CASP4
FKBP5	1.19358e-27	-0.618266	0.348	0.497	3.9258e-23	Mast_CPA3	FKBP5
UBALD2	1.23051e-27	-0.558876	0.291	0.442	4.04727e-23	Mast_CPA3	UBALD2
NCOR1	1.39924e-27	0.432492	0.329	0.232	4.60225e-23	Mast_CPA3	NCOR1
UCP2	1.72713e-27	-0.520094	0.359	0.494	5.68072e-23	Mast_CPA3	UCP2
ALDOA	2.47431e-27	-0.556722	0.705	0.719	8.13825e-23	Mast_CPA3	ALDOA
WDR45B	2.90616e-27	0.492466	0.281	0.182	9.55866e-23	Mast_CPA3	WDR45B
MEGF9	3.36433e-27	-0.595888	0.035	0.124	1.10656e-22	Mast_CPA3	MEGF9
CDK4	3.91652e-27	0.426754	0.255	0.162	1.28818e-22	Mast_CPA3	CDK4
CALM1	4.75141e-27	-0.594024	0.693	0.728	1.56279e-22	Mast_CPA3	CALM1
CMPK1	6.43883e-27	0.464789	0.321	0.228	2.1178e-22	Mast_CPA3	CMPK1
NRIP1	7.68427e-27	0.457406	0.247	0.151	2.52743e-22	Mast_CPA3	NRIP1
GNB1	8.80057e-27	-0.463028	0.346	0.503	2.8946e-22	Mast_CPA3	GNB1
ILF3	9.14297e-27	0.458664	0.319	0.224	3.00721e-22	Mast_CPA3	ILF3
WDFY3	1.19413e-26	-0.411903	0.02	0.1	3.9276e-22	Mast_CPA3	WDFY3
DEK	1.20158e-26	-0.428526	0.301	0.454	3.95211e-22	Mast_CPA3	DEK
HNRNPH1	1.87502e-26	0.537712	0.378	0.281	6.16714e-22	Mast_CPA3	HNRNPH1
PER1	1.87762e-26	0.429255	0.45	0.351	6.17569e-22	Mast_CPA3	PER1
JAZF1	1.92072e-26	0.417718	0.198	0.11	6.31745e-22	Mast_CPA3	JAZF1
CPD	2.50744e-26	-1.58349	0.133	0.244	8.24721e-22	Mast_CPA3	CPD
FUCA1	2.71587e-26	-0.467663	0.05	0.146	8.93276e-22	Mast_CPA3	FUCA1
LAPTM5	5.63754e-26	-0.429867	0.798	0.822	1.85424e-21	Mast_CPA3	LAPTM5
ATP5O	7.13509e-26	0.433474	0.144	0.068	2.3468e-21	Mast_CPA3	ATP5O
ZNF428	7.59716e-26	0.415239	0.282	0.19	2.49878e-21	Mast_CPA3	ZNF428
SHMT2	1.16745e-25	0.407775	0.188	0.106	3.83986e-21	Mast_CPA3	SHMT2
DHX36	1.39253e-25	0.480511	0.284	0.193	4.58016e-21	Mast_CPA3	DHX36
NOP58	1.79591e-25	0.42007	0.246	0.154	5.90693e-21	Mast_CPA3	NOP58
ATG2A	2.73534e-25	-0.534143	0.028	0.109	8.9968e-21	Mast_CPA3	ATG2A
ANP32E	3.0387e-25	0.4251	0.217	0.131	9.99458e-21	Mast_CPA3	ANP32E
FERMT3	3.28879e-25	-0.437231	0.251	0.39	1.08172e-20	Mast_CPA3	FERMT3
ABRACL	3.97197e-25	0.551826	0.455	0.374	1.30642e-20	Mast_CPA3	ABRACL
PPP1R18	4.16659e-25	-0.486912	0.218	0.356	1.37043e-20	Mast_CPA3	PPP1R18
ADIPOR1	6.27374e-25	-0.408056	0.183	0.32	2.06349e-20	Mast_CPA3	ADIPOR1
GSTP1	9.37399e-25	-0.443632	0.751	0.733	3.0832e-20	Mast_CPA3	GSTP1
PGS1	9.59867e-25	-0.704583	0.056	0.148	3.1571e-20	Mast_CPA3	PGS1
SF3B1	9.99384e-25	0.410537	0.391	0.302	3.28708e-20	Mast_CPA3	SF3B1
BCLAF1	1.17642e-24	0.434345	0.327	0.236	3.86937e-20	Mast_CPA3	BCLAF1
DNAJC19	1.63197e-24	0.444327	0.22	0.135	5.36772e-20	Mast_CPA3	DNAJC19
TRIM25	1.72171e-24	-0.473461	0.039	0.125	5.66288e-20	Mast_CPA3	TRIM25
UBXN2B	1.80619e-24	-0.47612	0.028	0.107	5.94075e-20	Mast_CPA3	UBXN2B
LIMS1	2.57193e-24	-0.457043	0.385	0.515	8.45934e-20	Mast_CPA3	LIMS1
CYTH1	3.62278e-24	-0.41176	0.163	0.293	1.19157e-19	Mast_CPA3	CYTH1
RPL35	4.85948e-24	0.448988	0.896	0.777	1.59833e-19	Mast_CPA3	RPL35
SERPINF1	6.48533e-24	-0.41215	0.05	0.139	2.13309e-19	Mast_CPA3	SERPINF1
POLR2A	6.75949e-24	0.406557	0.273	0.182	2.22326e-19	Mast_CPA3	POLR2A
MT1E	8.91728e-24	-1.11248	0.085	0.183	2.93298e-19	Mast_CPA3	MT1E
ITGA5	9.16364e-24	-0.421586	0.074	0.173	3.01401e-19	Mast_CPA3	ITGA5
TNFRSF21	9.19117e-24	0.486638	0.213	0.127	3.02307e-19	Mast_CPA3	TNFRSF21
KLF13	1.36456e-23	0.408939	0.215	0.13	4.48816e-19	Mast_CPA3	KLF13
HOOK2	1.42673e-23	0.40669	0.308	0.211	4.69265e-19	Mast_CPA3	HOOK2
MEAF6	1.56153e-23	0.414736	0.253	0.168	5.13604e-19	Mast_CPA3	MEAF6
ADAM8	2.26852e-23	-0.473454	0.107	0.216	7.46139e-19	Mast_CPA3	ADAM8
NCF1	2.31456e-23	-0.598107	0.13	0.24	7.61283e-19	Mast_CPA3	NCF1
IFNGR1	2.66229e-23	-0.509799	0.252	0.383	8.75653e-19	Mast_CPA3	IFNGR1
NSA2	2.9144e-23	0.435455	0.381	0.297	9.58574e-19	Mast_CPA3	NSA2
TUBA4A	2.95446e-23	-0.598498	0.032	0.11	9.71753e-19	Mast_CPA3	TUBA4A
SMIM3	3.43517e-23	0.524487	0.364	0.268	1.12986e-18	Mast_CPA3	SMIM3
ZNF638	5.08015e-23	0.407795	0.209	0.127	1.67091e-18	Mast_CPA3	ZNF638
SLC16A3	6.34743e-23	-0.546728	0.289	0.421	2.08773e-18	Mast_CPA3	SLC16A3
USP22	9.07262e-23	0.407142	0.25	0.165	2.98407e-18	Mast_CPA3	USP22
NDUFA1	1.06554e-22	-0.435562	0.519	0.62	3.50467e-18	Mast_CPA3	NDUFA1
OXSR1	1.25194e-22	-0.507073	0.08	0.177	4.11774e-18	Mast_CPA3	OXSR1
TNIP1	1.3009e-22	-0.577775	0.201	0.32	4.2788e-18	Mast_CPA3	TNIP1
ACP5	1.81472e-22	-1.02918	0.313	0.399	5.96879e-18	Mast_CPA3	ACP5
NT5C2	2.25981e-22	-0.454339	0.049	0.135	7.43273e-18	Mast_CPA3	NT5C2
TSPO	2.6263e-22	-0.593568	0.563	0.613	8.63816e-18	Mast_CPA3	TSPO
ATG7	2.68595e-22	-0.469068	0.067	0.16	8.83436e-18	Mast_CPA3	ATG7
CRTAP	2.85987e-22	0.426162	0.392	0.304	9.40638e-18	Mast_CPA3	CRTAP
FNBP4	3.5642e-22	0.406063	0.244	0.16	1.1723e-17	Mast_CPA3	FNBP4
APEX1	3.82845e-22	0.425749	0.327	0.244	1.25922e-17	Mast_CPA3	APEX1
HSF1	3.87555e-22	0.405821	0.248	0.167	1.27471e-17	Mast_CPA3	HSF1
WAS	3.88349e-22	-0.486346	0.241	0.378	1.27732e-17	Mast_CPA3	WAS
DOCK10	4.7164e-22	0.500427	0.277	0.194	1.55127e-17	Mast_CPA3	DOCK10
SYNGR2	5.22322e-22	-0.496496	0.353	0.469	1.71797e-17	Mast_CPA3	SYNGR2
CCT8	5.50564e-22	0.421947	0.346	0.262	1.81086e-17	Mast_CPA3	CCT8
DNAJA1	8.83806e-22	0.5879	0.541	0.474	2.90693e-17	Mast_CPA3	DNAJA1
BEST1	1.61099e-21	-0.671855	0.232	0.354	5.29872e-17	Mast_CPA3	BEST1
PRKCH	1.69267e-21	-0.436021	0.028	0.1	5.56737e-17	Mast_CPA3	PRKCH
C1orf162	1.82893e-21	-0.509902	0.355	0.466	6.01553e-17	Mast_CPA3	C1orf162
HEXB	1.83992e-21	-0.425541	0.239	0.361	6.05167e-17	Mast_CPA3	HEXB
SRSF10	2.10712e-21	0.494482	0.314	0.234	6.93052e-17	Mast_CPA3	SRSF10
CNN2	2.2598e-21	-0.544751	0.208	0.33	7.4327e-17	Mast_CPA3	CNN2
IL32	2.43314e-21	-0.434199	0.062	0.149	8.00285e-17	Mast_CPA3	IL32
LTB	3.3594e-21	-0.732145	0.043	0.12	1.10494e-16	Mast_CPA3	LTB
NCF1C	3.54649e-21	-0.483324	0.057	0.141	1.16648e-16	Mast_CPA3	NCF1C
MT1G	4.18708e-21	-2.24645	0.06	0.141	1.37717e-16	Mast_CPA3	MT1G
VASP	5.84316e-21	-0.555481	0.265	0.387	1.92187e-16	Mast_CPA3	VASP
AKR1B1	1.0115e-20	-0.421999	0.187	0.3	3.32693e-16	Mast_CPA3	AKR1B1
ARAP1	1.29155e-20	-0.474047	0.13	0.237	4.24803e-16	Mast_CPA3	ARAP1
ILF2	1.30857e-20	0.406279	0.36	0.282	4.30402e-16	Mast_CPA3	ILF2
VAMP8	1.31322e-20	-0.51561	0.587	0.619	4.31931e-16	Mast_CPA3	VAMP8
HIST1H2AC	1.35339e-20	-0.625807	0.039	0.113	4.45142e-16	Mast_CPA3	HIST1H2AC
SIL1	3.18536e-20	0.464662	0.23	0.155	1.0477e-15	Mast_CPA3	SIL1
PSMD1	3.43803e-20	0.405475	0.267	0.188	1.1308e-15	Mast_CPA3	PSMD1
FP671120.1	3.57849e-20	-1.38512	0.209	0.289	1.177e-15	Mast_CPA3	FP671120.1
DDX60L	4.5619e-20	-0.749179	0.073	0.158	1.50045e-15	Mast_CPA3	DDX60L
USP16	6.34796e-20	0.410955	0.224	0.148	2.08791e-15	Mast_CPA3	USP16
TIMP1	6.35821e-20	-2.27716	0.783	0.707	2.09128e-15	Mast_CPA3	TIMP1
ITGAE	8.69599e-20	0.547818	0.201	0.127	2.8602e-15	Mast_CPA3	ITGAE
PICALM	9.56971e-20	-0.529357	0.229	0.356	3.14757e-15	Mast_CPA3	PICALM
STAT1	9.93497e-20	-0.419898	0.197	0.312	3.26771e-15	Mast_CPA3	STAT1
TANK	1.19974e-19	-0.467509	0.134	0.24	3.94607e-15	Mast_CPA3	TANK
AMD1	1.252e-19	0.454046	0.275	0.197	4.11796e-15	Mast_CPA3	AMD1
ZNF267	1.60137e-19	-0.447915	0.184	0.301	5.26705e-15	Mast_CPA3	ZNF267
ZNF331	1.66185e-19	0.587469	0.457	0.369	5.46598e-15	Mast_CPA3	ZNF331
RPS29	2.76342e-19	1.08757	0.694	0.653	9.08916e-15	Mast_CPA3	RPS29
ACBD3	2.831e-19	0.428262	0.277	0.199	9.31144e-15	Mast_CPA3	ACBD3
NUMB	2.87431e-19	-0.471963	0.139	0.244	9.45388e-15	Mast_CPA3	NUMB
RPS20	2.90137e-19	1.07285	0.494	0.448	9.5429e-15	Mast_CPA3	RPS20
SEC61G	3.2967e-19	-0.432578	0.45	0.565	1.08432e-14	Mast_CPA3	SEC61G
EFCAB14	5.16727e-19	0.411498	0.252	0.175	1.69957e-14	Mast_CPA3	EFCAB14
TCEAL3	5.57038e-19	0.412914	0.207	0.134	1.83215e-14	Mast_CPA3	TCEAL3
UBE2B	6.22496e-19	-0.615223	0.339	0.469	2.04745e-14	Mast_CPA3	UBE2B
NFKB1	8.17925e-19	0.432177	0.456	0.369	2.69024e-14	Mast_CPA3	NFKB1
TUT7	1.04314e-18	-0.420332	0.075	0.16	3.43101e-14	Mast_CPA3	TUT7
NCF1B	1.51194e-18	-0.463925	0.067	0.149	4.97294e-14	Mast_CPA3	NCF1B
QKI	1.75071e-18	-0.458692	0.324	0.459	5.75826e-14	Mast_CPA3	QKI
PDLIM7	3.31111e-18	-0.413648	0.089	0.174	1.08906e-13	Mast_CPA3	PDLIM7
ATP2A2	3.84903e-18	0.535554	0.282	0.209	1.26599e-13	Mast_CPA3	ATP2A2
GSN	4.11462e-18	-0.589886	0.39	0.473	1.35334e-13	Mast_CPA3	GSN
ZFP36L1	5.40167e-18	-0.442639	0.501	0.602	1.77666e-13	Mast_CPA3	ZFP36L1
LAMTOR4	6.17692e-18	-0.489195	0.549	0.648	2.03165e-13	Mast_CPA3	LAMTOR4
C6orf48	7.01119e-18	0.415318	0.172	0.105	2.30605e-13	Mast_CPA3	C6orf48
RAB7A	7.66462e-18	-0.697716	0.435	0.551	2.52097e-13	Mast_CPA3	RAB7A
CCDC12	8.40655e-18	0.427852	0.246	0.176	2.765e-13	Mast_CPA3	CCDC12
MIIP	1.12158e-17	0.496459	0.203	0.136	3.689e-13	Mast_CPA3	MIIP
POLR2K	1.17267e-17	0.426968	0.282	0.212	3.85702e-13	Mast_CPA3	POLR2K
TUBB4B	1.32573e-17	0.420913	0.399	0.33	4.36046e-13	Mast_CPA3	TUBB4B
FOS	1.58301e-17	0.614218	0.796	0.779	5.20669e-13	Mast_CPA3	FOS
CHST15	2.18591e-17	-0.560231	0.058	0.129	7.18967e-13	Mast_CPA3	CHST15
MIF	4.11468e-17	-0.729861	0.688	0.715	1.35336e-12	Mast_CPA3	MIF
APOC1	4.21653e-17	-2.17858	0.259	0.326	1.38686e-12	Mast_CPA3	APOC1
AKAP9	5.52141e-17	0.416479	0.258	0.186	1.81605e-12	Mast_CPA3	AKAP9
DOCK8	1.5772e-16	-0.480443	0.185	0.293	5.18758e-12	Mast_CPA3	DOCK8
TAGAP	3.26816e-16	-0.53269	0.171	0.27	1.07493e-11	Mast_CPA3	TAGAP
GAB2	6.36959e-16	-0.678335	0.118	0.204	2.09502e-11	Mast_CPA3	GAB2
LPCAT1	8.88117e-16	-0.513739	0.112	0.196	2.9211e-11	Mast_CPA3	LPCAT1
TMCC1	2.49668e-15	-0.445808	0.053	0.12	8.21185e-11	Mast_CPA3	TMCC1
CD53	2.94966e-15	-0.484096	0.375	0.485	9.70172e-11	Mast_CPA3	CD53
VIM-AS1	3.85949e-15	0.408516	0.198	0.133	1.26942e-10	Mast_CPA3	VIM-AS1
MTCO1P12	4.28017e-15	0.811196	0.193	0.124	1.40779e-10	Mast_CPA3	MTCO1P12
SBF2	4.67594e-15	-0.466607	0.08	0.154	1.53796e-10	Mast_CPA3	SBF2
STK10	6.79652e-15	-0.434734	0.12	0.204	2.23544e-10	Mast_CPA3	STK10
PLAU	7.61308e-15	-0.560693	0.084	0.158	2.50402e-10	Mast_CPA3	PLAU
MED13L	9.4759e-15	-0.477265	0.135	0.221	3.11672e-10	Mast_CPA3	MED13L
RIPOR2	1.21663e-14	-1.15494	0.103	0.171	4.0016e-10	Mast_CPA3	RIPOR2
SIPA1L1	1.41791e-14	-0.717008	0.194	0.281	4.66363e-10	Mast_CPA3	SIPA1L1
MT2A	1.72968e-14	-1.66962	0.559	0.608	5.68909e-10	Mast_CPA3	MT2A
SEMA4A	2.32877e-14	0.517872	0.175	0.118	7.65955e-10	Mast_CPA3	SEMA4A
MAP2K3	4.0454e-14	-0.448721	0.162	0.25	1.33057e-09	Mast_CPA3	MAP2K3
AC090498.1	4.52747e-14	0.809096	0.218	0.155	1.48913e-09	Mast_CPA3	AC090498.1
TALDO1	3.77777e-13	-0.472558	0.541	0.611	1.24255e-08	Mast_CPA3	TALDO1
PGK1	4.44776e-13	-0.419575	0.51	0.578	1.46291e-08	Mast_CPA3	PGK1
USP36	1.15414e-12	-0.448364	0.104	0.176	3.79609e-08	Mast_CPA3	USP36
HSPB1	1.26233e-12	-0.731563	0.43	0.492	4.15193e-08	Mast_CPA3	HSPB1
PLD3	1.68907e-11	-0.782073	0.321	0.371	5.55551e-07	Mast_CPA3	PLD3
MT1X	2.15257e-11	-1.43374	0.237	0.309	7.08e-07	Mast_CPA3	MT1X
WDR83OS	4.45941e-11	0.415633	0.22	0.169	1.46675e-06	Mast_CPA3	WDR83OS
RPL38	9.00325e-11	0.688893	0.692	0.669	2.96126e-06	Mast_CPA3	RPL38
XIST	3.00798e-10	0.4799	0.164	0.117	9.89354e-06	Mast_CPA3	XIST
CST7	4.23813e-10	-0.613051	0.117	0.179	1.39396e-05	Mast_CPA3	CST7
IFITM1	5.47041e-10	-1.02991	0.232	0.296	1.79927e-05	Mast_CPA3	IFITM1
MIR4435-2HG	2.35614e-09	-0.555933	0.199	0.269	7.74957e-05	Mast_CPA3	MIR4435-2HG
ZSWIM6	6.27638e-09	-0.603453	0.173	0.239	0.000206437	Mast_CPA3	ZSWIM6
IFI27	4.66222e-08	-0.891108	0.11	0.158	0.00153345	Mast_CPA3	IFI27
DOCK5	9.66175e-08	-0.554851	0.122	0.176	0.00317785	Mast_CPA3	DOCK5
ABTB1	1.42825e-07	-0.47326	0.093	0.141	0.00469765	Mast_CPA3	ABTB1
SORL1	2.84907e-07	-0.687379	0.114	0.162	0.00937089	Mast_CPA3	SORL1
MAP4K4	6.1972e-07	-0.514616	0.131	0.179	0.0203832	Mast_CPA3	MAP4K4
CTSD	3.89552e-06	-0.834327	0.516	0.52	0.128127	Mast_CPA3	CTSD
TXNIP	5.59001e-06	-0.810618	0.425	0.468	0.183861	Mast_CPA3	TXNIP
IFITM2	3.29379e-05	-2.03196	0.779	0.691	1	Mast_CPA3	IFITM2
MCTP1	4.47989e-05	-0.533642	0.176	0.224	1	Mast_CPA3	MCTP1
IGLV1-40	6.17433e-05	0.701778	0.116	0.086	1	Mast_CPA3	IGLV1-40
ICAM1	6.18757e-05	-0.433462	0.379	0.441	1	Mast_CPA3	ICAM1
UBAP1	0.000181991	-0.446166	0.146	0.186	1	Mast_CPA3	UBAP1
ANP32A	0.000250562	-0.625198	0.344	0.404	1	Mast_CPA3	ANP32A
RPL41P1	0.000410594	-0.891154	0.182	0.203	1	Mast_CPA3	RPL41P1
EHD1	0.00284526	-0.476637	0.171	0.197	1	Mast_CPA3	EHD1
HIF1A	0.0030154	-0.417242	0.544	0.566	1	Mast_CPA3	HIF1A
APOE	0.00301706	-1.97368	0.356	0.333	1	Mast_CPA3	APOE
KATNBL1	0.00349828	-0.535595	0.097	0.125	1	Mast_CPA3	KATNBL1
YPEL3	0.00778959	-0.649641	0.296	0.329	1	Mast_CPA3	YPEL3
IFITM2.1	0	4.79805	0.984	0.674	0	Neu_IL1R1	IFITM2
IL1R2.1	0	4.60843	0.761	0.143	0	Neu_IL1R1	IL1R2
G0S2.1	0	4.00599	0.973	0.367	0	Neu_IL1R1	G0S2
CPD.1	0	3.81356	0.694	0.16	0	Neu_IL1R1	CPD
CSF3R.1	0	3.80022	0.763	0.182	0	Neu_IL1R1	CSF3R
FCGR3B	0	3.70478	0.57	0.015	0	Neu_IL1R1	FCGR3B
IFITM1.1	0	3.53712	0.765	0.221	0	Neu_IL1R1	IFITM1
ACSL1.1	0	3.49857	0.776	0.339	0	Neu_IL1R1	ACSL1
NAMPT.1	0	3.4664	0.985	0.598	0	Neu_IL1R1	NAMPT
CXCL8.1	0	3.45659	0.795	0.322	0	Neu_IL1R1	CXCL8
CMTM2	0	3.31137	0.459	0.007	0	Neu_IL1R1	CMTM2
RIPOR2.1	0	3.21911	0.56	0.105	0	Neu_IL1R1	RIPOR2
S100A8.1	0	3.11003	0.906	0.381	0	Neu_IL1R1	S100A8
S100A9.1	0	3.02353	0.934	0.49	0	Neu_IL1R1	S100A9
CXCR2	0	2.70977	0.327	0.005	0	Neu_IL1R1	CXCR2
LITAF.1	0	2.64059	0.882	0.644	0	Neu_IL1R1	LITAF
ADGRG3	0	2.6292	0.339	0.006	0	Neu_IL1R1	ADGRG3
AL049651.1	0	2.59106	0.246	0.008	0	Neu_IL1R1	AL049651.1
ALDH1A2	0	2.5507	0.312	0.021	0	Neu_IL1R1	ALDH1A2
FP236383.1.1	0	1.7441	0.852	0.219	0	Neu_IL1R1	FP236383.1
RPL28	0	-1.92801	0.497	0.988	0	Neu_IL1R1	RPL28
RPL30.1	0	-1.94479	0.409	0.976	0	Neu_IL1R1	RPL30
RPL37	0	-2.07551	0.267	0.957	0	Neu_IL1R1	RPL37
RPS5.1	0	-2.27127	0.105	0.888	0	Neu_IL1R1	RPS5
PPIA.1	0	-2.30803	0.08	0.867	0	Neu_IL1R1	PPIA
RPL24.1	0	-2.31747	0.118	0.91	0	Neu_IL1R1	RPL24
YBX1	0	-2.35241	0.073	0.844	0	Neu_IL1R1	YBX1
RPS21	0	-2.36231	0.133	0.927	0	Neu_IL1R1	RPS21
RPL39	0	-2.45601	0.314	0.98	0	Neu_IL1R1	RPL39
RPS25.1	0	-2.46038	0.148	0.927	0	Neu_IL1R1	RPS25
RPLP0	0	-2.49978	0.119	0.922	0	Neu_IL1R1	RPLP0
RPL9.1	0	-2.52035	0.1	0.883	0	Neu_IL1R1	RPL9
RPS27.1	0	-2.53392	0.248	0.953	0	Neu_IL1R1	RPS27
RPS15A.1	0	-2.54258	0.224	0.97	0	Neu_IL1R1	RPS15A
RPS3.1	0	-2.5427	0.197	0.952	0	Neu_IL1R1	RPS3
RPLP1	0	-2.54555	0.449	0.994	0	Neu_IL1R1	RPLP1
RPL10A.1	0	-2.55288	0.053	0.82	0	Neu_IL1R1	RPL10A
RPL35.1	0	-2.60519	0.067	0.896	0	Neu_IL1R1	RPL35
RPS27A.1	0	-2.61055	0.255	0.968	0	Neu_IL1R1	RPS27A
RPS7.1	0	-2.63269	0.134	0.948	0	Neu_IL1R1	RPS7
RPL23A.1	0	-2.65796	0.055	0.835	0	Neu_IL1R1	RPL23A
RPL8.1	0	-2.67453	0.182	0.966	0	Neu_IL1R1	RPL8
RPS19	0	-2.69331	0.198	0.965	0	Neu_IL1R1	RPS19
RPL22.1	0	-2.69374	0.067	0.906	0	Neu_IL1R1	RPL22
RPL18.1	0	-2.69983	0.141	0.958	0	Neu_IL1R1	RPL18
RPS6.1	0	-2.70324	0.127	0.914	0	Neu_IL1R1	RPS6
RPL36	0	-2.71743	0.108	0.949	0	Neu_IL1R1	RPL36
RPS3A.1	0	-2.74558	0.147	0.935	0	Neu_IL1R1	RPS3A
RPL3.1	0	-2.74575	0.089	0.893	0	Neu_IL1R1	RPL3
RPL35A.1	0	-2.74746	0.131	0.944	0	Neu_IL1R1	RPL35A
RPS14	0	-2.76948	0.206	0.966	0	Neu_IL1R1	RPS14
RPL12.1	0	-2.7853	0.175	0.974	0	Neu_IL1R1	RPL12
RPL14.1	0	-2.79019	0.106	0.92	0	Neu_IL1R1	RPL14
RPS28	0	-2.80491	0.247	0.984	0	Neu_IL1R1	RPS28
RPS2	0	-2.81977	0.126	0.926	0	Neu_IL1R1	RPS2
RPS12.1	0	-2.82052	0.193	0.982	0	Neu_IL1R1	RPS12
RPS15	0	-2.82061	0.187	0.977	0	Neu_IL1R1	RPS15
RPS24	0	-2.82264	0.192	0.971	0	Neu_IL1R1	RPS24
RPL7A.1	0	-2.82948	0.136	0.952	0	Neu_IL1R1	RPL7A
RPS18.1	0	-2.83046	0.161	0.952	0	Neu_IL1R1	RPS18
RPL37A.1	0	-2.834	0.058	0.86	0	Neu_IL1R1	RPL37A
RPL29.1	0	-2.86063	0.134	0.944	0	Neu_IL1R1	RPL29
RPLP2	0	-2.87122	0.117	0.95	0	Neu_IL1R1	RPLP2
RPL15.1	0	-2.89175	0.094	0.918	0	Neu_IL1R1	RPL15
RPL18A.1	0	-2.89788	0.137	0.949	0	Neu_IL1R1	RPL18A
RPS13	0	-2.91184	0.171	0.968	0	Neu_IL1R1	RPS13
RPL6.1	0	-2.91997	0.088	0.926	0	Neu_IL1R1	RPL6
RPL5.1	0	-2.93606	0.061	0.863	0	Neu_IL1R1	RPL5
RPL32.1	0	-2.94747	0.21	0.975	0	Neu_IL1R1	RPL32
VIM.1	0	-2.96303	0.311	0.956	0	Neu_IL1R1	VIM
RPS8.1	0	-2.98463	0.16	0.971	0	Neu_IL1R1	RPS8
TMSB10.1	0	-3.02789	0.381	0.988	0	Neu_IL1R1	TMSB10
PTMA.1	0	-3.02872	0.19	0.977	0	Neu_IL1R1	PTMA
RPL19.1	0	-3.03109	0.193	0.977	0	Neu_IL1R1	RPL19
RPL34.1	0	-3.07998	0.209	0.968	0	Neu_IL1R1	RPL34
LGALS1.1	0	-3.08378	0.083	0.831	0	Neu_IL1R1	LGALS1
RPL11.1	0	-3.1184	0.192	0.974	0	Neu_IL1R1	RPL11
RPL13.1	0	-3.17915	0.185	0.982	0	Neu_IL1R1	RPL13
RPL26.1	0	-3.26317	0.132	0.957	0	Neu_IL1R1	RPL26
RPS23.1	0	-3.33353	0.131	0.972	0	Neu_IL1R1	RPS23
CST3.1	0	-3.41753	0.154	0.906	0	Neu_IL1R1	CST3
S100A10.1	0	-3.46691	0.062	0.808	0	Neu_IL1R1	S100A10
RPS4X.1	0	-3.49887	0.082	0.945	0	Neu_IL1R1	RPS4X
EEF1A1.1	0	-3.53495	0.202	0.978	0	Neu_IL1R1	EEF1A1
RPL10.1	0	-3.62995	0.211	0.988	0	Neu_IL1R1	RPL10
CD74.1	0	-4.35379	0.241	0.886	0	Neu_IL1R1	CD74
HLA-DRB1.1	0	-4.87286	0.022	0.761	0	Neu_IL1R1	HLA-DRB1
PROK2	5.09055e-303	2.86567	0.252	0.01	1.67433e-298	Neu_IL1R1	PROK2
CTSB.1	4.4273e-302	-3.85891	0.024	0.758	1.45618e-297	Neu_IL1R1	CTSB
RPS16	3.33774e-298	-2.29597	0.124	0.879	1.09782e-293	Neu_IL1R1	RPS16
AQP9.1	3.60677e-298	3.18519	0.616	0.173	1.1863e-293	Neu_IL1R1	AQP9
NACA.1	4.06778e-296	-2.11133	0.171	0.909	1.33793e-291	Neu_IL1R1	NACA
RPL31.1	4.44068e-296	-2.4587	0.041	0.789	1.46059e-291	Neu_IL1R1	RPL31
RPL17.1	5.5009e-291	-2.12098	0.11	0.866	1.8093e-286	Neu_IL1R1	RPL17
BCL2A1.1	9.01429e-291	2.49445	0.88	0.577	2.96489e-286	Neu_IL1R1	BCL2A1
RPL21.1	1.26013e-289	-2.71204	0.11	0.855	4.14469e-285	Neu_IL1R1	RPL21
SRGN	3.56637e-289	1.51344	0.988	0.947	1.17301e-284	Neu_IL1R1	SRGN
HLA-DRA.1	1.48209e-288	-4.51224	0.054	0.754	4.87473e-284	Neu_IL1R1	HLA-DRA
RPL27	2.98103e-288	-2.29584	0.055	0.798	9.80491e-284	Neu_IL1R1	RPL27
GSTP1.1	4.4681e-288	-2.20705	0.07	0.821	1.4696e-283	Neu_IL1R1	GSTP1
EEF1B2.1	4.93824e-287	-2.15009	0.056	0.803	1.62424e-282	Neu_IL1R1	EEF1B2
GAPDH.1	9.59035e-287	-2.26188	0.319	0.95	3.15436e-282	Neu_IL1R1	GAPDH
TREM1.1	1.82026e-283	2.98619	0.701	0.281	5.98702e-279	Neu_IL1R1	TREM1
COX7C.1	3.27089e-283	-2.06775	0.04	0.776	1.07583e-278	Neu_IL1R1	COX7C
RPL41.1	3.89427e-283	-2.40553	0.258	0.942	1.28086e-278	Neu_IL1R1	RPL41
RNF149.1	1.48073e-282	3.0927	0.774	0.433	4.87026e-278	Neu_IL1R1	RNF149
RPL7.1	2.66783e-280	-2.651	0.044	0.77	8.77475e-276	Neu_IL1R1	RPL7
PFDN5	1.0299e-279	-1.91104	0.168	0.91	3.38745e-275	Neu_IL1R1	PFDN5
AC084871.1	1.06335e-279	2.67057	0.279	0.018	3.49746e-275	Neu_IL1R1	AC084871.1
FPR1.1	2.05461e-279	2.85746	0.732	0.329	6.75783e-275	Neu_IL1R1	FPR1
COX4I1	4.58476e-279	-1.84026	0.143	0.902	1.50797e-274	Neu_IL1R1	COX4I1
GPX4	7.56538e-279	-2.14212	0.069	0.806	2.48833e-274	Neu_IL1R1	GPX4
RPL4.1	3.70468e-277	-2.24831	0.042	0.764	1.21851e-272	Neu_IL1R1	RPL4
HLA-DPA1.1	5.30177e-274	-4.25966	0.017	0.708	1.7438e-269	Neu_IL1R1	HLA-DPA1
FXYD5.1	5.12962e-271	-2.14012	0.043	0.761	1.68718e-266	Neu_IL1R1	FXYD5
H3F3B	2.02107e-269	1.7463	0.955	0.944	6.64749e-265	Neu_IL1R1	H3F3B
NPC2.1	1.0418e-268	-2.31613	0.08	0.794	3.42658e-264	Neu_IL1R1	NPC2
RPSA.1	4.98503e-265	-2.19289	0.061	0.773	1.63963e-260	Neu_IL1R1	RPSA
RACK1.1	5.70455e-265	-2.58147	0.075	0.761	1.87628e-260	Neu_IL1R1	RACK1
BTF3	1.94761e-264	-1.93131	0.071	0.796	6.40587e-260	Neu_IL1R1	BTF3
HLA-DPB1.1	9.19492e-264	-4.22838	0.006	0.683	3.0243e-259	Neu_IL1R1	HLA-DPB1
RPL38.1	1.77392e-263	-2.29536	0.049	0.753	5.83461e-259	Neu_IL1R1	RPL38
SLC25A6	1.58708e-262	-2.20428	0.018	0.706	5.22008e-258	Neu_IL1R1	SLC25A6
SAT1.1	2.01233e-259	1.79681	0.984	0.943	6.61876e-255	Neu_IL1R1	SAT1
CAPG.1	1.94837e-258	-2.5503	0.032	0.714	6.40838e-254	Neu_IL1R1	CAPG
HSD11B1-AS1	2.38647e-256	2.22934	0.239	0.013	7.84934e-252	Neu_IL1R1	HSD11B1-AS1
ATP6V1F	1.20043e-255	-1.9689	0.051	0.75	3.94834e-251	Neu_IL1R1	ATP6V1F
VAMP8.1	8.36146e-253	-2.28284	0.017	0.688	2.75017e-248	Neu_IL1R1	VAMP8
HNRNPA1.1	1.26426e-251	-2.10519	0.03	0.708	4.15828e-247	Neu_IL1R1	HNRNPA1
ANXA1.1	2.7247e-251	-2.66093	0.049	0.728	8.9618e-247	Neu_IL1R1	ANXA1
RPS26.1	8.86366e-246	-1.79944	0.208	0.903	2.91535e-241	Neu_IL1R1	RPS26
RPS29.1	7.01236e-244	-2.68003	0.061	0.737	2.30643e-239	Neu_IL1R1	RPS29
LGALS3.1	5.57078e-243	-2.39889	0.049	0.719	1.83228e-238	Neu_IL1R1	LGALS3
NDUFB2	7.31197e-243	-1.98945	0.018	0.677	2.40498e-238	Neu_IL1R1	NDUFB2
RPS10.1	2.72084e-241	-2.12929	0.056	0.729	8.94911e-237	Neu_IL1R1	RPS10
GPX1P1.1	2.52437e-240	-2.4839	0.156	0.789	8.30289e-236	Neu_IL1R1	GPX1P1
RPL13A.1	2.42245e-237	-2.72683	0.071	0.746	7.96768e-233	Neu_IL1R1	RPL13A
EIF3K	3.86212e-236	-1.7027	0.063	0.746	1.27029e-231	Neu_IL1R1	EIF3K
RPL36A.1	9.22604e-236	-2.34413	0.022	0.668	3.03454e-231	Neu_IL1R1	RPL36A
PKM.1	3.85831e-235	-2.03968	0.035	0.69	1.26904e-230	Neu_IL1R1	PKM
KCNJ15	9.40702e-232	2.45273	0.275	0.026	3.09406e-227	Neu_IL1R1	KCNJ15
NDUFA4.1	2.58914e-231	-1.7688	0.049	0.712	8.51593e-227	Neu_IL1R1	NDUFA4
RGS10	1.95699e-230	-2.00458	0.012	0.646	6.43675e-226	Neu_IL1R1	RGS10
PRDX1	4.62677e-228	-2.19677	0.034	0.674	1.52179e-223	Neu_IL1R1	PRDX1
FP671120.1.1	7.26018e-228	1.19022	0.728	0.214	2.38795e-223	Neu_IL1R1	FP671120.1
MT-CO2	4.69827e-227	-1.29755	0.582	0.982	1.54531e-222	Neu_IL1R1	MT-CO2
CD81.1	5.29302e-227	-2.48327	0.013	0.639	1.74093e-222	Neu_IL1R1	CD81
SAMSN1	9.11527e-227	2.55132	0.805	0.624	2.9981e-222	Neu_IL1R1	SAMSN1
NPM1.1	9.18414e-226	-1.80764	0.042	0.689	3.02075e-221	Neu_IL1R1	NPM1
DBI	8.44655e-225	-1.78117	0.052	0.706	2.77816e-220	Neu_IL1R1	DBI
ANXA5.1	5.51518e-224	-1.93267	0.061	0.713	1.814e-219	Neu_IL1R1	ANXA5
SSR4.1	5.84747e-223	-1.58737	0.05	0.705	1.92329e-218	Neu_IL1R1	SSR4
COX6C	5.01179e-222	-1.64873	0.029	0.663	1.64843e-217	Neu_IL1R1	COX6C
ARHGAP26.1	6.02059e-220	3.04989	0.571	0.201	1.98023e-215	Neu_IL1R1	ARHGAP26
AL034397.3	1.09395e-218	2.49871	0.299	0.036	3.59812e-214	Neu_IL1R1	AL034397.3
RPL23.1	1.12635e-218	-1.96397	0.05	0.687	3.70467e-214	Neu_IL1R1	RPL23
CXCR1	2.23688e-218	1.59864	0.144	0.001	7.35733e-214	Neu_IL1R1	CXCR1
SERF2.1	6.94594e-218	-1.47744	0.443	0.965	2.28459e-213	Neu_IL1R1	SERF2
HSP90AB1.1	2.13742e-217	-1.81764	0.111	0.778	7.03019e-213	Neu_IL1R1	HSP90AB1
MT-ATP6	2.92923e-217	-1.62788	0.306	0.928	9.63454e-213	Neu_IL1R1	MT-ATP6
ATP5MC2	1.77034e-216	-1.99767	0.082	0.721	5.82282e-212	Neu_IL1R1	ATP5MC2
TIMP1.1	2.67094e-216	-3.15045	0.156	0.795	8.785e-212	Neu_IL1R1	TIMP1
MIF.1	4.12675e-216	-1.72103	0.114	0.785	1.35733e-211	Neu_IL1R1	MIF
EEF2.1	1.52293e-215	-1.68237	0.079	0.732	5.00908e-211	Neu_IL1R1	EEF2
SNRPD2.1	2.67424e-215	-1.55406	0.029	0.654	8.79584e-211	Neu_IL1R1	SNRPD2
TOMM7.1	4.91645e-215	-1.53793	0.057	0.702	1.61707e-210	Neu_IL1R1	TOMM7
RPS11	8.62313e-214	-1.74418	0.133	0.803	2.83623e-209	Neu_IL1R1	RPS11
ALPL	6.88277e-213	1.70685	0.146	0.002	2.26381e-208	Neu_IL1R1	ALPL
SLC25A5	1.47304e-211	-1.82311	0.03	0.647	4.84496e-207	Neu_IL1R1	SLC25A5
NEAT1	2.05246e-211	1.74604	0.897	0.828	6.75074e-207	Neu_IL1R1	NEAT1
TUBA1B	1.7005e-210	-2.15756	0.066	0.691	5.59311e-206	Neu_IL1R1	TUBA1B
EEF1G.1	1.86656e-210	-1.87753	0.025	0.633	6.13932e-206	Neu_IL1R1	EEF1G
ENO1.1	3.52405e-210	-1.6463	0.064	0.704	1.1591e-205	Neu_IL1R1	ENO1
NME2	3.58626e-210	-1.98319	0.053	0.677	1.17956e-205	Neu_IL1R1	NME2
IL18RAP	1.63144e-208	1.68044	0.159	0.004	5.36596e-204	Neu_IL1R1	IL18RAP
MT-CO1	4.66247e-208	-1.13646	0.581	0.986	1.53353e-203	Neu_IL1R1	MT-CO1
TPI1	4.71753e-207	-1.49008	0.113	0.778	1.55164e-202	Neu_IL1R1	TPI1
NDUFS5	7.06922e-207	-1.57202	0.024	0.629	2.32514e-202	Neu_IL1R1	NDUFS5
CD63.1	1.11421e-206	-1.64786	0.184	0.835	3.66476e-202	Neu_IL1R1	CD63
PPDPF.1	4.73031e-206	-1.66607	0.039	0.652	1.55585e-201	Neu_IL1R1	PPDPF
PELI1.1	5.60711e-206	2.91847	0.617	0.264	1.84423e-201	Neu_IL1R1	PELI1
TNFRSF10C	1.07836e-204	1.79752	0.182	0.008	3.54682e-200	Neu_IL1R1	TNFRSF10C
OST4	4.27504e-203	-1.22699	0.113	0.786	1.4061e-198	Neu_IL1R1	OST4
UQCRB	1.37244e-202	-1.37876	0.087	0.735	4.51409e-198	Neu_IL1R1	UQCRB
SELL.1	5.71501e-202	2.64596	0.402	0.087	1.87973e-197	Neu_IL1R1	SELL
NDUFB11	5.86036e-201	-1.56658	0.022	0.614	1.92753e-196	Neu_IL1R1	NDUFB11
ANXA2.1	1.72565e-200	-2.39746	0.036	0.624	5.67582e-196	Neu_IL1R1	ANXA2
SEC61B	7.81763e-200	-1.51259	0.069	0.696	2.5713e-195	Neu_IL1R1	SEC61B
RPL27A	8.93533e-200	-2.59851	0.041	0.635	2.93892e-195	Neu_IL1R1	RPL27A
CD99	9.72861e-200	-1.86034	0.013	0.594	3.19984e-195	Neu_IL1R1	CD99
HSP90B1.1	4.07967e-199	-1.79722	0.034	0.63	1.34184e-194	Neu_IL1R1	HSP90B1
UBB.1	7.27032e-199	-1.4469	0.156	0.82	2.39128e-194	Neu_IL1R1	UBB
AP2S1.1	3.50252e-196	-1.69475	0.038	0.634	1.15201e-191	Neu_IL1R1	AP2S1
HCAR3	3.23999e-195	2.797	0.3	0.043	1.06567e-190	Neu_IL1R1	HCAR3
HLA-DQB1.1	1.98707e-194	-3.15512	0.022	0.588	6.53566e-190	Neu_IL1R1	HLA-DQB1
PPIB	9.20258e-191	-1.51591	0.09	0.714	3.02682e-186	Neu_IL1R1	PPIB
SEC61G.1	2.57283e-190	-1.5998	0.028	0.606	8.4623e-186	Neu_IL1R1	SEC61G
CALR	5.3686e-190	-1.86104	0.036	0.614	1.76579e-185	Neu_IL1R1	CALR
EDF1	1.0883e-189	-1.26809	0.058	0.664	3.57951e-185	Neu_IL1R1	EDF1
COMMD6.1	4.8664e-189	-1.26355	0.08	0.701	1.60061e-184	Neu_IL1R1	COMMD6
PLIN2.1	5.41718e-189	-2.08385	0.023	0.589	1.78176e-184	Neu_IL1R1	PLIN2
HLA-DQA1.1	2.91472e-188	-3.45385	0.008	0.557	9.58679e-184	Neu_IL1R1	HLA-DQA1
AHNAK.1	3.3574e-188	-2.16172	0.015	0.575	1.10428e-183	Neu_IL1R1	AHNAK
PSAP.1	2.1218e-187	-1.76937	0.279	0.865	6.9788e-183	Neu_IL1R1	PSAP
OSM.1	2.18703e-186	3.2235	0.487	0.154	7.19336e-182	Neu_IL1R1	OSM
LUCAT1.1	5.24282e-186	2.83405	0.412	0.102	1.72442e-181	Neu_IL1R1	LUCAT1
MXD1.1	9.53961e-186	2.79234	0.628	0.317	3.13767e-181	Neu_IL1R1	MXD1
HIGD2A	2.68788e-185	-1.41159	0.038	0.617	8.84071e-181	Neu_IL1R1	HIGD2A
COX5A	4.70306e-182	-1.46605	0.031	0.597	1.54688e-177	Neu_IL1R1	COX5A
CRIP1.1	5.54577e-182	-2.64697	0.038	0.595	1.82406e-177	Neu_IL1R1	CRIP1
LYZ.1	5.00936e-177	-2.86486	0.082	0.633	1.64763e-172	Neu_IL1R1	LYZ
SMCHD1	6.56896e-176	2.98183	0.56	0.242	2.1606e-171	Neu_IL1R1	SMCHD1
LMNA.1	6.60304e-176	-2.82404	0.015	0.547	2.17181e-171	Neu_IL1R1	LMNA
DYNLL1	6.73715e-176	-1.36386	0.048	0.614	2.21592e-171	Neu_IL1R1	DYNLL1
EMP3	1.26453e-175	-1.39733	0.143	0.758	4.15915e-171	Neu_IL1R1	EMP3
POLR2L.1	3.53944e-175	-1.3404	0.047	0.611	1.16416e-170	Neu_IL1R1	POLR2L
RPL36AL.1	3.67279e-175	-1.10156	0.167	0.821	1.20802e-170	Neu_IL1R1	RPL36AL
CTSZ.1	1.16267e-174	-2.28972	0.058	0.608	3.82414e-170	Neu_IL1R1	CTSZ
MT-ND3	1.12189e-173	-1.36079	0.291	0.904	3.69001e-169	Neu_IL1R1	MT-ND3
MME	1.16527e-173	1.45508	0.13	0.003	3.83268e-169	Neu_IL1R1	MME
HSPA8	1.46437e-173	-1.53327	0.104	0.695	4.81645e-169	Neu_IL1R1	HSPA8
UQCRH	5.31835e-173	-1.12823	0.092	0.694	1.74926e-168	Neu_IL1R1	UQCRH
UBA52	1.44628e-172	-1.27597	0.297	0.908	4.75697e-168	Neu_IL1R1	UBA52
RGS1.1	3.33789e-172	-2.74848	0.016	0.543	1.09786e-167	Neu_IL1R1	RGS1
GPX1.1	5.02977e-172	-1.67655	0.058	0.619	1.65434e-167	Neu_IL1R1	GPX1
CHCHD2	8.40675e-172	-1.11674	0.139	0.778	2.76506e-167	Neu_IL1R1	CHCHD2
C4orf48	9.74174e-172	-1.41673	0.037	0.586	3.20416e-167	Neu_IL1R1	C4orf48
APRT	5.15893e-171	-1.50703	0.008	0.53	1.69682e-166	Neu_IL1R1	APRT
HLA-DRB5.1	5.59292e-171	-2.99677	0.003	0.52	1.83957e-166	Neu_IL1R1	HLA-DRB5
NR4A1.1	8.3372e-171	-2.18329	0.023	0.554	2.74219e-166	Neu_IL1R1	NR4A1
SUMO2.1	1.48929e-170	-1.09411	0.111	0.725	4.89843e-166	Neu_IL1R1	SUMO2
RAN	1.52756e-170	-1.379	0.031	0.575	5.02431e-166	Neu_IL1R1	RAN
NDUFA13	1.84435e-170	-1.30232	0.027	0.567	6.06624e-166	Neu_IL1R1	NDUFA13
XPO6.1	5.40275e-170	2.62964	0.4	0.105	1.77702e-165	Neu_IL1R1	XPO6
ARL6IP4	1.27893e-169	-1.24465	0.031	0.574	4.20654e-165	Neu_IL1R1	ARL6IP4
LCP2	1.57003e-169	2.64129	0.724	0.557	5.16397e-165	Neu_IL1R1	LCP2
NDUFB4	4.28016e-169	-1.23339	0.032	0.574	1.40779e-164	Neu_IL1R1	NDUFB4
GSTO1.1	7.50044e-168	-1.40958	0.048	0.598	2.46697e-163	Neu_IL1R1	GSTO1
GPR183.1	9.02646e-168	-2.42283	0.006	0.519	2.96889e-163	Neu_IL1R1	GPR183
KRTCAP2	1.40101e-166	-1.26109	0.035	0.574	4.60807e-162	Neu_IL1R1	KRTCAP2
TUBB	4.30859e-166	-1.59505	0.034	0.567	1.41714e-161	Neu_IL1R1	TUBB
UCP2.1	6.24316e-166	-1.75407	0.01	0.523	2.05344e-161	Neu_IL1R1	UCP2
MT2A.1	4.67725e-165	-3.5627	0.117	0.658	1.53839e-160	Neu_IL1R1	MT2A
PLEK.1	5.29003e-165	2.96056	0.673	0.429	1.73994e-160	Neu_IL1R1	PLEK
DUSP1	5.32484e-164	1.76195	0.887	0.856	1.75139e-159	Neu_IL1R1	DUSP1
COX8A.1	9.77152e-164	-1.01718	0.126	0.738	3.21395e-159	Neu_IL1R1	COX8A
HLA-DMA.1	1.1189e-163	-2.1555	0.019	0.531	3.68017e-159	Neu_IL1R1	HLA-DMA
HNRNPDL.1	1.66017e-163	-1.22584	0.051	0.597	5.46046e-159	Neu_IL1R1	HNRNPDL
PLAUR.1	2.0691e-163	2.0416	0.778	0.606	6.80546e-159	Neu_IL1R1	PLAUR
MTDH	7.43282e-163	-1.2004	0.038	0.573	2.44473e-158	Neu_IL1R1	MTDH
PSME2.1	5.18776e-162	-1.44372	0.067	0.617	1.70631e-157	Neu_IL1R1	PSME2
ATP1B3	8.87512e-162	-1.58295	0.038	0.564	2.91911e-157	Neu_IL1R1	ATP1B3
COX7A2	2.39841e-161	-1.01512	0.102	0.693	7.88861e-157	Neu_IL1R1	COX7A2
HCAR2	4.77633e-161	2.60214	0.286	0.049	1.57098e-156	Neu_IL1R1	HCAR2
PARK7	6.00342e-161	-1.29847	0.026	0.546	1.97459e-156	Neu_IL1R1	PARK7
TMEM258	7.4679e-161	-1.01903	0.074	0.639	2.45627e-156	Neu_IL1R1	TMEM258
EIF3F.1	1.13384e-160	-1.3496	0.017	0.528	3.72931e-156	Neu_IL1R1	EIF3F
HINT1.1	4.45503e-159	-1.38481	0.056	0.596	1.4653e-154	Neu_IL1R1	HINT1
GNAS	5.11299e-159	-1.1423	0.143	0.749	1.68171e-154	Neu_IL1R1	GNAS
CD68.1	2.44003e-158	-1.99849	0.031	0.543	8.02551e-154	Neu_IL1R1	CD68
BST2.1	5.72798e-158	-1.37145	0.035	0.554	1.88399e-153	Neu_IL1R1	BST2
PABPC1	1.80475e-157	-1.08481	0.201	0.825	5.93599e-153	Neu_IL1R1	PABPC1
SRP14.1	1.58566e-156	-0.983946	0.162	0.792	5.2154e-152	Neu_IL1R1	SRP14
TMEM176B	1.97231e-156	-2.1687	0.011	0.504	6.48713e-152	Neu_IL1R1	TMEM176B
MT-ND2	3.89037e-156	-1.22339	0.307	0.907	1.27958e-151	Neu_IL1R1	MT-ND2
NAP1L1	8.44064e-156	-1.54284	0.006	0.496	2.77621e-151	Neu_IL1R1	NAP1L1
UQCRQ	1.04032e-155	-1.04551	0.063	0.607	3.4217e-151	Neu_IL1R1	UQCRQ
LDHA.1	1.64254e-155	-1.32238	0.068	0.608	5.40248e-151	Neu_IL1R1	LDHA
SLC25A37.1	6.89749e-155	2.22173	0.618	0.309	2.26865e-150	Neu_IL1R1	SLC25A37
CYCS	2.28869e-154	-1.54909	0.017	0.514	7.52774e-150	Neu_IL1R1	CYCS
FAU.1	3.49797e-154	-0.971078	0.637	0.975	1.15052e-149	Neu_IL1R1	FAU
EEF1D.1	3.55014e-154	-1.03963	0.218	0.85	1.16768e-149	Neu_IL1R1	EEF1D
RPS20.1	1.05502e-153	-2.33894	0.021	0.513	3.47006e-149	Neu_IL1R1	RPS20
AC092746.1	1.45835e-153	1.28458	0.101	0.001	4.79667e-149	Neu_IL1R1	AC092746.1
RNH1.1	2.80503e-153	-1.394	0.016	0.51	9.22602e-149	Neu_IL1R1	RNH1
EPHB1	2.97065e-153	1.47928	0.118	0.003	9.77076e-149	Neu_IL1R1	EPHB1
ATP5MC3	3.0851e-153	-1.54082	0.024	0.525	1.01472e-148	Neu_IL1R1	ATP5MC3
ST13.1	5.09844e-153	-1.30923	0.017	0.511	1.67693e-148	Neu_IL1R1	ST13
ALOX5AP.1	2.66445e-152	1.87052	0.749	0.512	8.76363e-148	Neu_IL1R1	ALOX5AP
EIF3H	2.96773e-152	-1.14208	0.03	0.536	9.76117e-148	Neu_IL1R1	EIF3H
MS4A7.1	3.10867e-151	-2.12378	0.001	0.475	1.02247e-146	Neu_IL1R1	MS4A7
ZNF706.1	7.51634e-151	-1.20742	0.034	0.539	2.4722e-146	Neu_IL1R1	ZNF706
PDE4B.1	6.17381e-150	3.38392	0.588	0.319	2.03063e-145	Neu_IL1R1	PDE4B
GRN.1	1.26431e-149	-1.56996	0.093	0.624	4.15843e-145	Neu_IL1R1	GRN
RPS27L	2.10127e-149	-1.27305	0.035	0.537	6.91127e-145	Neu_IL1R1	RPS27L
CTSH.1	2.30741e-149	-1.71262	0.006	0.482	7.58932e-145	Neu_IL1R1	CTSH
ATOX1.1	2.13125e-148	-1.49033	0.034	0.532	7.00989e-144	Neu_IL1R1	ATOX1
PDIA3.1	1.18599e-147	-1.24357	0.039	0.541	3.90083e-143	Neu_IL1R1	PDIA3
HCST.1	1.57894e-147	-1.40352	0.045	0.551	5.19329e-143	Neu_IL1R1	HCST
LAPTM4A.1	4.57996e-147	-1.53465	0.044	0.544	1.50639e-142	Neu_IL1R1	LAPTM4A
MZT2B	4.88108e-147	-1.2218	0.025	0.514	1.60544e-142	Neu_IL1R1	MZT2B
AC022498.1	1.93717e-146	1.31508	0.105	0.002	6.37153e-142	Neu_IL1R1	AC022498.1
LRRC75A-AS1.1	3.54206e-146	-1.37097	0.045	0.547	1.16502e-141	Neu_IL1R1	LRRC75A-AS1
EIF3G	3.98729e-146	-1.18139	0.021	0.503	1.31146e-141	Neu_IL1R1	EIF3G
SMDT1	8.83738e-146	-1.27852	0.009	0.48	2.9067e-141	Neu_IL1R1	SMDT1
TMEM71	2.66079e-145	1.95133	0.211	0.026	8.7516e-141	Neu_IL1R1	TMEM71
CSTB.1	3.43105e-145	-1.61931	0.17	0.725	1.12851e-140	Neu_IL1R1	CSTB
SOD1.1	2.40648e-144	-1.2433	0.021	0.499	7.91517e-140	Neu_IL1R1	SOD1
CALM1.1	2.95058e-144	-1.11248	0.195	0.787	9.70475e-140	Neu_IL1R1	CALM1
HLA-B.1	5.9649e-144	1.02607	0.945	0.939	1.96191e-139	Neu_IL1R1	HLA-B
HSPB1.1	1.57036e-143	-1.93261	0.044	0.534	5.16507e-139	Neu_IL1R1	HSPB1
MINOS1	2.35632e-143	-0.993178	0.055	0.566	7.75016e-139	Neu_IL1R1	MINOS1
EIF3E.1	1.63302e-142	-1.46433	0.008	0.469	5.37118e-138	Neu_IL1R1	EIF3E
PSMA7.1	1.64095e-141	-0.876106	0.124	0.691	5.39724e-137	Neu_IL1R1	PSMA7
TBCA	2.81702e-141	-1.03752	0.042	0.536	9.26547e-137	Neu_IL1R1	TBCA
SYNGR2.1	1.42186e-140	-1.42772	0.025	0.498	4.67663e-136	Neu_IL1R1	SYNGR2
CIRBP.1	1.61417e-140	-1.02064	0.069	0.583	5.30915e-136	Neu_IL1R1	CIRBP
CDKN1A	2.09467e-140	-1.3531	0.051	0.543	6.88958e-136	Neu_IL1R1	CDKN1A
NCL.1	1.00537e-139	-1.07935	0.043	0.533	3.30677e-135	Neu_IL1R1	NCL
RBX1	1.2926e-139	-1.1046	0.026	0.5	4.2515e-135	Neu_IL1R1	RBX1
UBXN1	1.3205e-139	-1.00493	0.041	0.53	4.34325e-135	Neu_IL1R1	UBXN1
LDHB.1	2.79544e-139	-1.52059	0.014	0.473	9.19448e-135	Neu_IL1R1	LDHB
SEM1	2.92292e-139	-1.20928	0.019	0.486	9.61379e-135	Neu_IL1R1	SEM1
ROMO1	7.21423e-139	-1.04331	0.051	0.546	2.37283e-134	Neu_IL1R1	ROMO1
RBM3	1.25026e-138	-1.15176	0.024	0.494	4.11223e-134	Neu_IL1R1	RBM3
CHCHD10	2.92785e-138	-1.44391	0.017	0.478	9.62998e-134	Neu_IL1R1	CHCHD10
IVNS1ABP.1	4.47234e-138	2.83402	0.566	0.306	1.471e-133	Neu_IL1R1	IVNS1ABP
ATP5F1D	8.83216e-138	-1.18569	0.053	0.546	2.90498e-133	Neu_IL1R1	ATP5F1D
MT-ND4	1.09136e-137	-1.09162	0.404	0.935	3.58959e-133	Neu_IL1R1	MT-ND4
HMGN1.1	1.47165e-136	-1.04204	0.037	0.514	4.84042e-132	Neu_IL1R1	HMGN1
ATP5MG	2.72808e-135	-1.15281	0.126	0.663	8.97294e-131	Neu_IL1R1	ATP5MG
SH3BGRL	3.43404e-135	-0.997746	0.051	0.538	1.12949e-130	Neu_IL1R1	SH3BGRL
S100P	1.41341e-134	2.39062	0.278	0.057	4.64886e-130	Neu_IL1R1	S100P
SKP1.1	1.93722e-134	-0.788777	0.113	0.658	6.37171e-130	Neu_IL1R1	SKP1
PTGES3	2.06367e-134	-1.09986	0.027	0.49	6.78761e-130	Neu_IL1R1	PTGES3
NDUFB9	3.01391e-134	-1.04293	0.026	0.487	9.91307e-130	Neu_IL1R1	NDUFB9
IL1RAP.1	4.44709e-134	2.54351	0.376	0.114	1.46269e-129	Neu_IL1R1	IL1RAP
SEC11A.1	9.64957e-134	-0.899791	0.044	0.524	3.17384e-129	Neu_IL1R1	SEC11A
MS4A6A.1	1.16463e-132	-2.14452	0.024	0.471	3.83059e-128	Neu_IL1R1	MS4A6A
UQCR10.1	1.84917e-132	-0.86189	0.104	0.633	6.08209e-128	Neu_IL1R1	UQCR10
CD52.1	4.23508e-132	-1.92979	0.004	0.439	1.39296e-127	Neu_IL1R1	CD52
PSMB6	4.58379e-132	-0.987361	0.036	0.502	1.50765e-127	Neu_IL1R1	PSMB6
EID1.1	9.78509e-132	-1.10694	0.016	0.463	3.21841e-127	Neu_IL1R1	EID1
YPEL3.1	1.61008e-131	2.64098	0.545	0.294	5.29571e-127	Neu_IL1R1	YPEL3
VDAC2	2.4586e-131	-1.07556	0.019	0.468	8.08659e-127	Neu_IL1R1	VDAC2
FTH1.1	4.90232e-131	0.704645	0.997	0.997	1.61242e-126	Neu_IL1R1	FTH1
TGFBI.1	3.85195e-130	-1.88804	0.001	0.429	1.26695e-125	Neu_IL1R1	TGFBI
LSM7	1.2545e-129	-1.14886	0.013	0.451	4.12618e-125	Neu_IL1R1	LSM7
MRPL52	1.36653e-129	-1.15092	0.023	0.47	4.49466e-125	Neu_IL1R1	MRPL52
C19orf53	4.75974e-129	-0.968037	0.037	0.498	1.56553e-124	Neu_IL1R1	C19orf53
CDC37	4.9064e-129	-0.944313	0.056	0.535	1.61376e-124	Neu_IL1R1	CDC37
ANAPC11.1	6.31076e-129	-0.908949	0.053	0.528	2.07567e-124	Neu_IL1R1	ANAPC11
CANX	7.22567e-129	-1.00961	0.038	0.499	2.37659e-124	Neu_IL1R1	CANX
TRIB1.1	1.39875e-128	2.50425	0.425	0.159	4.60061e-124	Neu_IL1R1	TRIB1
ACP5.1	1.83723e-128	-2.05744	0.003	0.428	6.04283e-124	Neu_IL1R1	ACP5
HSPE1	2.22725e-128	-1.44093	0.052	0.517	7.32566e-124	Neu_IL1R1	HSPE1
CSNK2B	7.88181e-128	-0.835761	0.06	0.539	2.59241e-123	Neu_IL1R1	CSNK2B
P4HB	8.22534e-128	-1.13093	0.035	0.489	2.7054e-123	Neu_IL1R1	P4HB
RPS17	1.03533e-127	-1.13754	0.023	0.466	3.40529e-123	Neu_IL1R1	RPS17
[truncated: 9,366 more rows]

## Sheet: Supplemental table S6
Supplementary Table S6, the top 30 DEGs of 6 malignant epithelium cell subclusters
[truncated: 5,326 more rows]

[truncated: 3 more sheets: Supplemental table S7, Supplemental table S8, Supplemental table S9]
